# Supplementary material for: The Yeast Transcription Factor Crz1 Is Activated by Light in a Ca2+/Calcineurin-Dependent and PKA-Independent Manner
Source: PLoS One. 2013 Jan 15;8(1):e53404. doi: 10.1371/journal.pone.0053404 (PMC3546054; doi:10.1371/journal.pone.0053404)
Supplement: Datasheet S2 — Experimental data. Nuclear localization trajectories for individual cells. (XLSX) [file pone.0053404.s008.xlsx]

## Sheet: Crz1 CaCl2
Nuclear localization trajectory
	Light intensity (μW):	115	115	115	115	115	115	115	115	115	115	115	115	115	115	115	115	115	115	115	115	115	115	115	115	115	115	115	115	115	115	115	115	115	115	115	115	115	115	115	115	115	115	115	115	115	115	115	115
	Ca2+ (mM):	0.0008	0.0008	0.0008	0.0008	0.0008	0.0008	0.0008	0.0008	0.0008	0.0008	0.0008	0.0008	0.0008	0.0008	0.0008	0.0008	0.0008	0.0008	0.0008	0.0008	0.0008	0.0008	0.0008	0.0008	0.0008	0.0008	0.0008	0.0008	0.0008	0.0008	0.0008	0.0008	0.0008	0.0008	0.0008	0.0008	0.0008	0.0008	0.0008	0.0008	0.0008	0.0008	0.0008	0.0008	0.0008	0.0008	0.0008	0.0008
	Strain:	wt	wt	wt	wt	wt	wt	wt	wt	wt	wt	wt	wt	wt	wt	wt	wt	wt	wt	wt	wt	wt	wt	wt	wt	wt	wt	wt	wt	wt	wt	wt	wt	wt	wt	wt	wt	wt	wt	wt	wt	wt	wt	wt	wt	wt	wt	wt	wt
Frame:	Cell:
1		0.0130268	0.130206	-0.0193906	0.00813592	0.198209	0.169461	0.105187	0.0398406	0.124954	0.053862	0.108139	0.168221	0.0820779	0.098519	-0.00477961	0.076087	0.128143	0.147925	0.00701978	0.0624434	0.183673	0.00992411	-0.0608466	0.0495191	0.01	0.094768	0.147504	0.0175439	0.0658413	0.216916	0.145682	0.0425717	0.0339204	0.0406852	0.198903	0.0957576	0.0654028	0.0768013	0.107884	0.0570342	0.168922	0.00639854	0.158255	0.111057	-0.014862	0.181749	0.0920314	0.0184539
2		0.0354158	0.114439	0.0510304	0.0350704	0.207857	0.160361	0.0850909	0.0313779	0.0630631	0.115042	0.0898123	0.199228	0.0678777	0.111399	0.0249458	0.0488499	0.184411	0.159849	-0.0183007	0.0976059	0.175966	0.0297376	-0.00943396	0.0961678	0.202539	0.156283	0.128721	-0.0337323	0.0240223	0.24947	0.0883055	0.048913	0.119048	0.0673235	0.234667	0.202059	0.0118721	0.0460526	0.0737705	0.0785164	0.151462	-0.002331	0.137396	0.0919652	-0.025247	0.155767	0.0529311	-0.0245399
3		0.0296869	0.0757849	0.0524767	0.0495909	0.142508	0.191075	0.0686792	0.0168067	0.0932722	0.0962644	0.145561	0.159478	0.0472392	0.101116	0.0535616	0.00663717	0.207277	0.126167	-0.0758355	0.0419385	0.166667	-0.00722022	-0.0431706	0.072974	0.184377	0.131441	0.109761	0.0545455	0.0415954	0.182393	0.132918	0.0507246	0.147229	0.132013	0.215462	0.0332103	0.0597303	0.136556	0.159516	0.0589396	0.212393	0.0848401	0.134412	0.117618	0.0247748	0.113785	0.0264789	0.196945
4		0.0880963	0.0710081	0.0241935	0.0210726	0.169498	0.182573	0.0326005	0.127007	0.169352	0.102372	0.106816	0.157183	0.047908	0.115242	-0.0449251	-0.0155231	0.16025	0.125618	0.0040107	0.0772201	0.19577	-0.0267062	0.028777	0.0272315	0.146356	0.100211	0.0865835	0.133971	0.0530565	0.205025	0.114103	0.046729	0.147229	0.0879552	0.158171	0.0591327	0.129159	0.121746	0.155556	0.111057	0.18219	0.0318896	0.128116	0.0983422	-0.0549451	0.138254	0.0321101	0.0042735
5		0.0945534	0.0590717	0.0196672	-0.0360041	0.180727	0.229924	0.0512624	0.060276	0.154589	0.0989092	0.0896169	0.186893	-0.0163147	0.123776	-0.0472396	0.059415	0.179675	0.183381	-0.0499325	0.0409914	0.133162	-0.0406213	-0.0724638	0.0404153	0.113014	0.146769	0.130292	0.16368	0.0578704	0.182555	0.0820365	0.0537229	0.0798249	0.0414395	0.193828	0.0562092	0.0896818	0.125951	0.111607	0.127446	0.217033	0.0588798	0.130231	0.0674931	0.0259887	0.13376	0.0747826	-0.0637849
6		0.0394295	0.144332	0.0464396	-0.0559948	0.271321	0.246291	-0.00933126	0.113278	0.208674	0.109773	0.129766	0.15768	0.0637689	0.17353	0.0689452	-0.00710846	0.174741	0.155302	0.0290344	-0.0155039	0.169259	0.044072	-0.175037	-0.0476551	0.0736127	0.129702	0.0552	0.0866911	0.109244	0.18582	0.103151	0.0380228	0.189882	0.172889	0.143205	0.0651042	0.158426	0.124024	0.047619	0.199398	0.16548	0.0307911	0.154296	0.130876	0.0327684	0.102942	0.0722749	0.129032
7		0.0633245	0.111324	0.0104058	0.0160974	0.279955	0.225977	0.00240577	0.135385	0.157202	0.0899128	0.136314	0.0654052	0.0533884	0.114958	0.0438389	-0.0517594	0.165381	0.239603	-0.0791269	0.00491642	0.117744	-0.00429711	-0.0529501	0.0305677	0.123529	0.182784	0.0491271	0.0209618	0.122871	0.172586	0.108862	0.167665	0.13278	0.096	0.171583	0.120219	-0.0455005	0.212066	-0.00333704	0.193044	0.195652	0.00826446	0.108326	0.137337	-0.0688073	0.106484	0.0447059	-0.0277186
8		0.064632	0.10645	0.063197	0.00929615	0.244302	0.268029	0.0544872	0.0642202	0.0958904	0.132982	0.162808	0.0756803	0.0149899	0.122968	-0.0679837	-0.0189164	0.183951	0.241148	0.0498946	0.0312815	0.0862394	0.0263819	-0.0724638	-0.104651	0.117914	0.134736	0.0576606	-0.00987654	0.0879518	0.167329	0.0395417	-0.0172084	0.137931	0.00507614	0.153903	0.0711297	0.053719	0.144404	0.0838117	0.174265	0.188172	0.0416667	0.119076	0.142572	-0.0728929	0.10413	0.052506	-0.0617801
9		0.0796541	0.149123	0.0597826	0.0341444	0.277695	0.282731	0.0114566	-0.0598939	0.0812395	0.117168	0.183689	0.0550107	0.0122197	0.0990099	0.037929	-0.0323336	0.0912725	0.305046	-0.0473538	0.0677452	0.101802	-0.0148148	-0.0511628	0.0051731	0.1	0.140069	-0.00810373	-0.0933661	0.0495413	0.228976	0.11248	0.112438	0.107444	-0.0147059	0.203129	0.0608696	0.101957	0.108132	0.00332963	0.193548	0.219467	0.0444553	0.0925622	0.181755	-0.0607477	0.0389775	0.0913491	0.0108814
10		0.0803738	0.114904	0.0184255	-0.0368577	0.231892	0.317099	0.112583	0.146752	0.115105	0.111857	0.0942238	0.0260572	0.038609	0.108089	-0.161747	-0.0264089	0.180237	0.270992	0.0290987	0.0399181	0.112145	0.0242347	0.0806065	0.0202301	0.0244457	0.117849	0.151128	-0.0339623	0.144785	0.219911	0.128326	0.047619	0.137491	0.0250569	0.195122	0.0534979	0.0725552	0.154827	0.111617	0.175549	0.120321	0.049952	0.13114	0.165878	0.0635294	0.0517153	-0.0434265	0.180365
11		0.0262418	0.121017	0.0620538	-0.0478385	0.265887	0.278383	0.00668338	0.0556439	0.0544831	0.109827	0.14954	0.0413437	0.00426117	0.15253	-0.0141538	0.0152259	0.143942	0.217156	-0.0211268	0.0943396	0.127463	0.0580728	0.106591	0.0299595	0.150886	0.0792541	0.080597	0.101673	0.170792	0.214409	0.123908	0.0795918	0.0951872	-0.0103211	0.167043	0.0247253	0.0883919	0.190783	0.0954064	0.170669	0.141008	0.0301556	0.139563	0.185073	-0.0352113	0.0777934	0.110972	-0.0220905
12		0.0610105	0.122112	0.0541761	0.0162387	0.106826	0.239888	0.0517388	0.0791599	0.0803493	0.0782562	0.14159	0.0181661	0.0626469	0.128508	-0.043206	-0.0501809	0.147887	0.210071	-0.0198968	0.0423992	0.0844488	0.0732951	-0.0771654	0.00933821	0.192831	0.109412	0.00628931	-0.00662252	0.138404	0.128011	0.120861	0.0870445	0.151994	0.0808023	0.179461	0	0.0994536	0.0874317	0.0561283	0.17424	0.157103	0.0029513	0.111179	0.0484158	-0.0835322	0.109609	0.0738007	-0.0647091
13		0.0267176	0.119764	0.100116	0.0461495	0.241973	0.216994	0.14969	0.110557	0.099868	0.109352	0.136821	0.0392411	0.0661806	0.100656	-0.0316967	-0.00318471	0.0819113	0.250794	0.00215363	0.126882	0.0827142	0.023612	0.146508	-0.00738916	0.173267	0.095702	0.0532141	-0.0734177	0.147151	0.202849	0.0940973	0.0835073	0.17438	0.00532229	0.188869	0.0409027	0.13369	0.181474	0.094959	0.231771	0.222277	0.0641026	0.101817	0.225156	-0.049763	0.0605187	0.0923947	0.146399
14		0.0716724	0.126234	0.0668216	0.0744226	0.206531	0.249057	-0.0137221	0.102649	0.118174	0.0767754	0.174374	0.0458554	0.041517	0.119585	0.00389105	-0.0118256	0.176346	0.21253	0.00363108	0.00537057	0.0528667	0.159841	-0.0743134	0.00622665	0.131422	0.107637	0.0756376	0.0116732	0.0500951	0.140342	0.079835	0.0643154	0.205347	0.0670588	0.2171	0.0727532	0.00659341	0.128788	0.0636792	0.204946	0.146067	0.0204082	0.0980392	0.199049	-0.135889	0.0331959	0.0665837	0.149616
15		0.0599901	0.069489	0.0350877	0.0887523	0.265849	0.247406	0.0699364	0.0824742	0.12147	0.0987136	0.172078	0.0330062	0.0340566	0.115399	0.00784314	-0.0329724	0.163854	0.286351	0.0566616	0.0283843	0.0445013	0.0555919	-0.0979757	-0.0274146	0.166871	0.02	0.0421903	0.00962861	0.135787	0.170284	0.0359325	0.0636079	0.108874	0.0383029	0.174669	0.012987	0.0199557	0.175373	0.0395349	0.174595	0.109005	0.0696517	0.0776478	0.208127	0.00973236	0.0764302	0.119896	0.119527
16		0.058296	0.0769231	0.10574	0.0815526	0.241147	0.232609	0.115315	0.0748528	0.0821733	0.0457641	0.13641	0.0290568	0.0359587	0.0750462	0.0212492	0.0161772	0.138252	0.246048	-0.0158014	0.107062	0.0552866	0.0200401	0.0230179	0.00939769	0.0580645	0.103904	0.0765766	-0.025641	0.126761	0.143993	0.0520937	0.0777311	0.127206	-0.0217391	0.18957	0.112094	0.0307018	0.172414	0.0346476	0.168481	0.132075	0.109617	0.0750149	0.14605	-0.0845411	0.0721428	0.109702	0.046875
17		-0.0153694	0.0674603	0.038961	0.0777232	0.208872	0.316733	0.0558559	0.115318	0.0758808	0.0770088	0.124001	0.0694507	0.0121933	0.00258589	0.0155239	0.0733417	0.154207	0.24856	0.0653344	0.0615385	0.0413811	0.0794923	-0.178895	0.0445695	-0.0110375	0.145122	0.0539823	-0.00962861	0.128991	0.146849	0.0717478	0.0349947	0.155256	-0.00596659	0.161734	0.11353	0.00444444	0.111323	0.059952	0.251527	0.075428	0.0140421	0.106429	0.190767	-0.0911243	0.0515371	0.077597	0.0247934
18		0.0262481	0.0647072	0.11236	0.0935903	0.236715	0.263608	0.0637119	0.104895	0.101093	0.0864446	0.213314	0.0340807	0.0263158	0.130267	0.0242305	0.0327869	0.193478	0.258606	0.0327994	0.0601336	0.0258959	0.0843373	-0.147059	0.00728676	0.0359551	0.0704739	0.0644283	0.0655271	0.0318389	0.138808	0.0893357	0.0681081	0.181308	0.0152532	0.177717	0.0403587	0.010101	0.236111	0.110294	0.181866	0.100336	0.0296221	0.113793	0.163446	-0.0219146	-0.0959089	0.0948167	0.209803
19		0.00823893	0.0644307	0.0199396	0.105645	0.298937	0.241092	0.077484	0.121693	0.106832	0.0806334	0.147837	0.0381125	0.0153297	0.147654	0.0675497	0.0722551	0.151714	0.215063	-0.0260611	0.0728929	0.115385	0.0288397	-0.172237	-0.0181034	0.0961428	0.082397	0.0738377	0.0207469	0.133807	0.142886	0.0991746	0.0338983	0.145344	0.032858	0.181623	0.15969	0	0.148259	0.0746269	0.183174	0.139155	0.0710213	0.096251	0.147838	-0.00496278	-0.0956062	0.0793854	-0.0284123
20		0.0806794	0.0717204	0.049697	0.109674	0.0334736	0.252772	0.0272813	0.133929	0.105729	0.0906158	0.135966	0.0240145	0.0570697	0.104478	0.0274247	0.0768836	0.168228	0.31637	0.0600156	0.0309051	0.0604278	0.0348525	0.0918544	0.0765529	0.0470788	0.164669	0.0671677	-0.0700809	0.0849421	0.146975	0.0940669	0.0618893	0.119459	0.0384615	0.161874	0.0425532	-0.0573678	0.193227	0.0746269	0.132753	0.10073	0.0386001	0.106702	0.152876	0.00865266	0.0414922	0.0382925	0.0226612
21		0.0251046	0.0923042	0.0327044	0.106914	0.201062	0.302208	0.0462701	0.0928962	0.122905	0.0821028	0.234635	0.0567605	0.0572166	0.125392	0.0618627	0.0875743	0.172731	0.255237	0.0238278	0.0479376	0.05764	0.0639456	-0.167224	0.0931395	0.0635104	0.187863	0.0858752	-0.0681818	0.112861	0.138955	0.0781512	0.0796074	0.148078	0	0.222222	0.0540958	0.028169	0.192423	0.054321	0.191524	0.177284	0.058642	0.161534	0.187402	-0.11655	-0.0480397	0.0669291	0.130072
22		0.04772	0.0873653	0.0765338	0.0929177	-0.0555335	0.285164	0.0148423	0.0709091	0.109628	0.0850588	0.251409	0.0392891	0.0493218	0.119462	-0.0688963	-0.00815146	0.189507	0.307562	0.0379147	0.00794552	0.0423592	0.164014	0.0314136	0.124661	0.00582072	0.118926	0.0469986	-0.0873239	0.0903098	0.190486	0.0563272	0.0672451	0.185875	0.0547264	0.172846	-0.0507463	0.0379747	0.027451	0.0517024	0.153785	0.148438	0.0320248	0.135392	0.161806	-0.00246914	-0.0739613	0.0971429	-0.00799087
23		0.0331551	0.0981494	0.0821133	0.0506082	0.101614	0.279336	0.117135	0.157994	0.0913485	0.0886648	0.242405	0.0283554	0.00542552	0.0968513	0.0870166	0.0372539	0.189756	0.287146	-0.0434783	0.0785973	0.115353	0.0337525	-0.210978	0.160904	0.023118	0.113681	0.0836466	-0.0114286	0.162791	0.141511	0.0970785	0.0725275	0.1965	0.0959079	0.15812	0.125	0.0350467	0.183099	0.0646766	0.188856	0.130221	0.067491	0.132229	0.138227	-0.121175	-0.111352	0.037224	0.00569476
24		0.0526316	0.0781287	0.0774194	0.0966744	-0.0403209	0.268205	-0.0447471	0.0430797	0.0957552	0.015618	0.215398	0.00696702	0.0251209	0.160113	0.124915	0.075983	0.101315	0.307863	-0.0165746	-0.0104773	0.092613	0.060166	0.0362319	0.114739	0.0830325	0.145553	-0.0357641	0.0293255	0.0929319	0.138044	0.0795794	0.0043956	0.204429	0.0120177	0.130552	0.1296	0.0117371	0.165445	0.0855683	0.223929	0.0767717	0.0277632	0.0933037	0.174335	-0.124088	-0.124355	0.0848523	-0.0443548
25		0.0241546	0.0786734	0.0744337	0.0857232	0.123606	0.311828	0.0896552	0.171484	0.0328185	0.0701942	0.242848	0.0424638	0.0339115	0.139871	0.0296896	0.0102014	0.166802	0.289146	0.0101801	0.0114943	0.0856042	0.071525	-0.250429	0.10316	0.0577259	0.131833	0.0265982	0.0204678	0.154309	0.142261	0.064225	0.0143646	0.157812	-0.010296	0.150619	-0.0382848	0.0477327	0.194245	0.0692308	0.196765	0.124573	0.0356768	0.100174	0.161201	0.0213836	-0.0974836	0.0188189	0.095122
26		-0.00808625	0.0256049	0.0974633	0.0971717	0.181375	0.354996	0.0878906	0.125364	0.012488	0.0446841	0.230222	0.00469484	0.0274535	0.135091	0.0965092	-0.018389	0.133201	0.334815	0.011236	0.107317	0.0844749	0.0745429	0.019678	0.109583	0.0394814	0.066273	0.0790743	-0.0147059	0.149965	0.165305	0.0848757	0.0886364	0.196819	0.0803109	0.175104	0.1875	-0.0498812	0.114201	0.111111	0.198704	0.133764	0.0352076	0.0786875	0.177124	-0.0420792	-0.126246	0.100857	-0.00413956
27		0.0844193	0.144526	0.065057	0.062726	0.224471	0.242333	-0.0188679	0.0474383	0.00934579	0.0597062	0.230981	0.0259117	-0.0095057	0.166873	0.111111	0.0428266	0.172641	0.296313	0.00247729	-0.0159119	0.106602	0.140636	-0.173451	0.0892279	0.111645	0.224518	0.1073	-0.0178042	0.0997305	0.144401	0.0657165	0.0624291	0.173931	0.0223072	0.1916	0.00963082	-0.0086741	0.122699	0.095176	0.186267	0.0571715	-0.0346275	0.091581	0.132292	-0.2494	-0.143315	0.0142303	0.13256
28		0.0320366	0.133235	0.0613621	0.0870117	0.174857	0.205572	0.0953347	0.0529355	0.0486855	0.0273823	0.0628495	0.0142586	-0.0104563	0.103967	0.0309704	0.0372936	0.157637	0.271233	0.0434084	0.00737101	0.0858455	0.0310988	0.0243024	0.165781	0.113787	0.146739	0.1231	-0.112409	0.15189	0.112066	0.0931997	0.0271493	0.197092	-0.00125786	0.153436	0.089404	0.0536585	0.139918	0.0810811	0.165165	0.120923	-0.0149716	0.120583	0.152143	-0.0203046	-0.132463	0.0701058	-0.0380623
29		0.0458613	0.118204	0.0303439	0.0884553	0.188022	0.270164	0.0368852	0.0652386	0.0282651	0.0738964	0.210095	0.0412518	-0.00699968	0.0626841	0.0595655	-0.0359946	0.157676	0.316247	-0.00977199	0.025641	0.0902256	0.0136006	-0.191451	0.175728	0.0993939	0.136799	0.152791	0.0153374	0.130495	0.145872	0.0770256	0.184241	0.0999201	-0.0236573	0.137465	0.0503356	0.128911	0.15778	0.121252	0.193352	0.17002	0.0485744	0.112391	0.134089	-0.0897756	-0.163849	0.0718085	-0.052879
30		0.0112233	0.0978234	0.0568883	0.0846964	0.228798	0.323697	0.0368034	0.0766169	0.000486145	0.0464556	0.195836	0.0544218	-0.0250199	0.16289	0.0662021	0.0121392	0.129925	0.255339	0.0218121	0.00757576	0.100885	0.0644258	0.0671642	0.126494	0.0903686	0.126389	0.0798594	0.108696	0.153165	0.117685	0.0890929	0.134703	0.0702314	0.0471761	0.116578	-0.0100671	0.0788804	0.215042	0.0379085	0.186253	0.13102	-0.0021164	0.0933026	0.179062	-0.157764	-0.156435	0.0475553	0.0502693
31		-0.00600765	0.132802	0.080163	0.121182	0.156272	0.27213	0.0734824	0.089613	-0.0145218	0.0604636	0.298689	0.00239349	0.0201321	0.109577	-0.00212917	0.0262152	0.154819	0.286054	0.0291734	-0.0780669	0.075179	0.064861	-0.178634	0.231384	0.0532544	0.112971	0.126425	-0.050536	0.0329218	0.160579	0.0407746	0.165888	0.107843	0.0477454	0.201158	-0.0394737	0.00392157	0.100629	0.0671835	0.18551	0.0700447	-0.0470588	0.130251	0.171279	-0.0709838	0.0569278	0.0644068	0.0494931
32		-0.0206819	0.0640993	0.0523338	0.10474	0.214775	0.287711	0.0991736	0.0868687	0.056213	0.0658952	0.29862	-0.0382409	0.00695006	0.154648	0.0534459	-0.0489057	0.209483	0.241379	0.0616034	-0.047619	0.0620934	0.122132	0.0425926	0.101118	0.0502924	0.135943	0.124937	0.0602782	0.0458971	0.134417	0.0779366	0.147161	0.189234	0.0395257	0.213124	0.0541872	0.0881988	0.234088	0.11413	0.162714	0.195855	0.00748663	0.116849	0.151119	0.00648508	0.0668859	0.0447154	0.0054878
33		0.0681168	0.00377169	0.0592384	0.0574028	0.158957	0.252551	0.0324607	0.102646	0.0674157	0.0894229	0.252432	0.022048	0.0207989	0.127679	0.0581395	0.038025	0.198575	0.242224	0.0730868	-0.0812808	0.0495169	0.106291	0.118081	0.176292	0.0577933	0.156964	0.15139	-0.0519878	0.178845	0.143496	0.0179723	0.133178	0.105482	-0.0298013	0.187573	0.168	0.0458488	0.164835	0.136552	0.189235	0.205958	-0.0461049	0.0866402	0.111908	0.0150754	0.0301818	0.018133	0.00551809
34		0.0364372	0.101857	0.0163701	0.104974	0.0779938	0.268615	-0.00431965	0.144319	-0.00152362	0.0424498	0.29968	0.0249004	0.0443333	0.148497	0.0948148	0.0217931	0.155142	0.235741	-0.0209908	0.0636605	0.0846626	0.0320285	-0.131579	0.156663	0.0918791	0.192806	0.18893	0.0459588	0.113287	0.161327	0.0812711	0.0992908	0.144891	0.0584192	0.165442	0.0115702	0.0963705	0.136364	0.142045	0.244229	0.0245368	0.075399	0.104762	0.162419	-0.0216561	-0.00214746	0.0346703	0.0455105
35		0.0870871	0.109861	0.115696	0.126602	0.14073	0.291117	0.0141458	0.200422	0.112494	0.0501388	0.221598	0.0468127	0.0333333	0.148231	0.0335071	0.00646976	0.191103	0.231211	-0.0210615	0.0976864	0.0789474	0.0921053	0.0430712	0.207745	0.107584	0.147164	0.146444	0.0128205	0.0998584	0.0992211	0.115585	0.0945626	0.127651	0.0776632	0.187612	-0.110922	0.0462725	0.207763	0.0591549	0.217391	0.132275	0.0125341	0.136503	0.166365	-0.0577664	0.00588678	0.171449	-0.0503067
36		0.0707657	0.0316184	0.049676	0.104244	0.220577	0.239965	-0.0575693	0.0810811	0.114686	0.0988314	0.285181	-0.0193611	0.0778585	0.0853273	0.0523169	-0.0302521	0.154255	0.270543	0.0190641	-0.0139771	0.0656613	0.0165826	-0.129646	0.198093	0.0471753	0.178624	0.142562	-0.0418006	0.107143	0.15809	0.0374212	0.0117371	0.10944	-0.00548697	0.156932	0.0461538	-0.0668348	0.127733	0.0434783	0.165354	0.21383	0.0172228	0.142377	0.179516	-0.126615	-0.0114973	-0.00619408	0.0953295
37		0.025974	0.0658241	0.0943953	0.0863519	0.147516	0.262669	-0.0423729	0.0963597	0.14555	0.0498583	0.248398	0.0223992	0.0681895	0.140351	-0.0133136	-0.0195412	0.168879	0.263923	-0.0604805	0.0860077	0.0625391	0.113809	0.0808271	0.183307	0.101432	0.168889	0.127749	-0.0129032	0.0947293	0.128849	0.0951344	0.17284	0.103272	0.0755495	0.157518	0.00689655	0.047619	0.239105	0.0676056	0.25576	0.202122	0.0217865	0.101652	0.15413	-0.0824468	-0.0398429	0.0394366	0.0259901
38		0.0872483	0.0150457	0.0337243	0.130631	0.225	0.293034	0.0740741	0.101075	0.152488	0.0810632	0.25665	0.0177755	0.0983523	0.136717	0.00294551	-0.0310034	0.133636	0.218735	0.027027	0.00398406	0.0455814	0.0620384	-0.0871143	0.0735219	0.119904	0.258634	0.0939112	-0.031348	0.057423	0.089652	0.129191	0.0542453	0.154858	0.0414617	0.111838	0.0618182	0.0304636	0.222349	0.0633284	0.231658	0.228147	-0.0555861	0.0540541	0.0991093	-0.088042	-0.00891617	0.0526316	-0.073913
39		0.0647308	0.0383673	0.0402341	0.13001	0.163599	0.336514	0.016835	0.122004	0.0896328	0.0530799	0.288686	0.00493097	0.0982935	0.142592	0.0423792	0.0165939	0.223597	0.264865	-0.00251046	-0.0351105	-0.00563204	0.0556777	0.0266667	0.132669	0.0714715	0.138643	0.155391	0.0846906	0.107955	0.108574	0.0585494	0.0844553	0.136021	-0.0074124	0.13415	0.0831858	0.0626632	0.221321	0.0186514	0.233703	0.147419	0.00624645	0.0938401	0.161616	-0.0233196	-0.0271756	0.00852273	0.0711139
40		0.036643	0.0365084	0.10459	0.109635	0.161769	0.247894	-0.0445434	0.122807	0.169067	0.0731053	0.232739	0.065701	0.12304	0.131899	0.0133531	0.0351819	0.170418	0.232063	-0.0272169	0.088	0.0474663	0.113905	-0.0912477	0.185105	0.0860849	0.190656	0.0584551	-0.0266876	0.125904	0.114158	0.0714286	0.00834327	0.153003	0.0119298	0.166163	0.151515	0.117486	0.00896861	0.117816	0.191011	0.171566	-0.0324748	0.164771	0.187054	-0.0550336	0.00842709	0.0294329	0.0467649
41		0.0948905	0.0650521	0.0699462	0.122795	0.0492976	0.289388	0.116071	0.058698	0.0758472	0.0631218	0.213546	0.0476689	0.11858	0.162369	-0.0179828	-0.0318874	0.208413	0.237374	-0.00779221	0.103164	0.0714286	0.0526316	0.0488281	0.282271	0.103387	0.0544061	0.156936	-0.00340136	0.0571837	0.109958	0.0806357	0.0682927	0.159394	-0.0504492	0.114715	0.157303	-0.0404172	0.18932	-0.0324401	0.0650069	0.0710498	0.0355161	0.153092	0.112143	0.0396717	0.00186418	0.0696023	-0.0490798
42		0.0661626	0.032636	0.117284	0.101226	0.0819588	0.282135	0.0434783	0.119649	0.177778	0.0789876	0.266839	-0.0175258	0.0975651	0.16555	-0.0137615	0.0573892	0.229305	0.224822	-0.0356212	-0.0354796	0.0788705	0.0201149	-0.116367	0.206174	0.1093	0.195635	0.0940355	0.00494234	0.118335	0.105137	0.100357	0.0533981	0.0913043	0.0516039	0.130838	0.0125673	0.0765101	0.134396	0.105185	0.117681	0.0442765	0.0237288	0.136129	0.139273	-0.0626632	0.0188173	0.0158046	-0.0247462
43		0.0877839	0.0634744	0.0956389	0.159316	0.125934	0.237829	-0.0293083	0.133858	0.182784	0.0322471	0.296173	-0.00810537	0.0903215	0.162385	-0.0640543	-0.00928613	0.129001	0.27151	-0.0452962	0.122363	0.0308399	0.107623	0.101843	0.274424	0.0554231	0.196217	0.0485333	0.0733333	0.111661	0.118965	0.0679087	0.0755668	0.105573	0.00785153	0.177832	0.0273224	0.105405	0.119767	-0.0101597	0.153868	0.173984	0.0373349	0.181478	0.193686	-0.0162162	0.0257052	0.0629471	-0.0236422
44		0.0207824	0.00472616	0.0793893	0.125292	0.185268	0.346734	0.0492958	0.118451	0.165247	0.0686785	0.242525	0.0520723	0.115819	0.137179	0.00766871	0.00176574	0.178055	0.224323	0.00450857	0.104225	0.0801325	0.0579179	-0.092803	0.196458	0.0699881	0.192632	0.0590786	-0.0286678	0.0566572	0.133808	0.0865556	0.168142	0.115523	-0.047619	0.180838	0.0664207	0.0598053	0.0531178	0.179331	0.146644	0.122845	0.0490868	0.126987	0.184171	0.00687758	-0.00408682	-0.0165349	-0.0512983
45		0.114583	0.0936608	0.131723	0.0860927	0.119734	0.322767	0.00575374	0.106043	0.134463	0.0549026	0.240125	-0.00954401	0.0935128	0.158722	-0.0319564	-0.0127634	0.169201	0.209653	-0.0262919	0.0209205	0.0497828	0.0453858	-0.0606061	0.164835	0.0797546	0.110085	0.058127	0.0635452	0.114708	0.113259	0.0870943	0.143911	0.0545291	0.122628	0.16812	0.120755	0.133144	0.21059	0.185299	0.157147	0.174833	0.0158192	0.191249	0.168663	0.00282486	0.0321158	0.0606061	0.00127714
46		0.0687898	0.0639401	0.0719258	0.101751	0.149093	0.251575	0.110048	0.176056	0.220023	0.0456693	0.291166	-0.0820021	0.0834502	0.128405	-0.0457413	-0.00269139	0.191273	0.141098	-0.070018	0.0771429	0.0278804	0.0876085	-0.0297398	0.197105	0.0660377	0.128044	0.125	-0.00866551	0.0984195	0.109765	0.0811306	0.199488	0.0681199	0.050462	0.160383	-0.0192308	0.0154712	0.19197	0.138756	0.177533	0.118739	0.00623229	0.123148	0.120195	0.0365169	0.00308486	-0.0216028	0.107672
47		0.00695762	0.0527211	0.112676	0.129356	0.110494	0.298764	0.0504808	0.163803	0.191638	0.102741	0.29898	-0.0685077	0.121387	0.141882	0.0595711	-0.0280319	0.126425	0.181586	-0.0570136	0.0808511	0.0564242	0.0564263	-0.0444234	0.201533	0.0972389	0.164286	0.118268	-0.153213	0.0748396	0.132396	0.0956709	0.121569	0.0905781	0.0868629	0.185018	0.196154	0.100437	0.0671378	0.125392	0.173925	0.115616	0.00677966	0.15882	0.138304	0.00136054	0.0598585	0.148748	-0.0660502
48		0.0403531	0.0741379	0.0916149	0.137698	0.174986	0.321429	-0.0204082	0.0971302	0.223707	0.0778422	0.238754	-0.0106496	0.0984875	0.179022	0.0291109	-0.0381431	0.174619	0.17757	-0.0296496	0.0822511	0.0518468	0.0613208	0.0229226	0.203125	0.0675676	0.112069	0.0679934	0.00516351	0.0733096	0.111672	0.0854859	0.0694626	0.0252874	0.000738007	0.190216	0.0207156	0.0615165	0.00931315	-0.0103093	0.227706	0.0295082	0.0746791	0.175979	0.15398	0.00680272	0.063613	0.0681159	0.013089
49		0.0396975	0.0589945	0.0980707	0.0975924	0.170201	0.229433	0.00615006	0.118203	0.211584	0.0573293	0.319764	0.00488334	0.116008	0.111003	-0.0545455	-0.0220744	0.113682	0.215915	-0.0255474	-0.0118343	0.105972	0.109677	-0.0304183	0.195095	0.0901391	0.121309	0.0454545	0.0836237	0.154192	0.13815	0.0904321	0.043257	0.0321678	0.165543	0.138889	-0.019305	0.0125874	0.182278	0.0107527	0.159247	0.27052	-0.00801833	0.178154	0.160123	0.0691114	0.094162	0.0377358	-0.0241357
50		0.0342599	-0.0241198	0.0175579	0.120386	0.0837004	0.25	-0.00244499	0.089372	0.153353	0.056678	0.257842	-0.0235875	0.108604	0.145602	-0.0712608	0.0039382	0.105398	0.170394	-0.0246126	0.162577	0.0751956	0.129902	0.0507812	0.152429	0.0840491	0.143083	0.12422	-0.0104167	0.141902	0.0852792	0.104379	0.0987342	0.112782	0.0584752	0.154793	0.105368	0.0434783	0.156055	0.165563	0.204973	0.183445	0.0265387	0.175371	0.139637	0.00141044	0.0681	0.10597	-0.0164799
51		0.0471272	0.0647904	0.0430279	0.138995	0.172077	0.227485	-0.00869565	0.0661765	0.271752	0.0971555	0.258654	-0.00776915	0.105928	0.0996529	-0.0595711	0.0239117	0.163559	0.158285	0.0153846	-0.0706215	0.0575514	0.0764381	-0.0271055	0.186127	0.114764	0.103774	0.0410023	-0.0446735	0.108889	0.0943689	0.0630404	0.0666667	0.0624409	0.114829	0.10016	0.153846	-0.076259	0.03125	0.0816993	0.214953	0.178286	0.015634	0.143313	0.166826	0.0116618	0.0292015	0.0756914	0.0328299
52		0.0751143	0.0876986	0.0996678	0.152254	0.162005	0.302598	0.109948	0.0689238	0.21599	0.0994152	0.242408	-0.0318332	0.112569	0.181363	-0.0182106	0.0129557	0.15493	0.209034	-0.0185185	0.0741301	0.0613793	0.106315	-0.105706	0.159587	0.18583	0.0995185	0.0155799	0.0505415	0.0958801	0.107965	0.104124	0.106383	0.104196	0.058193	0.15095	0.0121951	0.0146199	0.1341	0.0500808	0.151256	0.187961	-0.0248987	0.162354	0.180369	0.0289017	0.0184255	0.0650888	-0.0216678
53		0.00711054	0.142857	0.0536278	0.144762	0.134459	0.29802	0.102464	0.0714286	0.234731	0.0735161	0.231872	-0.0214168	0.0839506	0.15838	-0.0248199	0.0198634	0.148649	0.174076	-0.0339138	0.0162482	0.0739437	0.16545	0.017341	0.183465	0.125153	0.154459	0.137232	0.0827338	0.0726872	0.124045	0.0791344	0.048	0.143961	0.0044843	0.149685	0.0671937	0.00435414	0.0664994	0.15	0.173139	0.259217	0.0490082	0.153557	0.122481	-0.0625	0.0336855	0.108251	-0.0411413
54		0.0467413	0.105911	0.0413907	0.114182	0.141007	0.348849	0.0327654	0.152625	0.220811	0.10544	0.275164	-0.0207283	0.10868	0.160519	-0.0446067	-0.0221675	0.157838	0.143915	0.0451977	0.0694006	0.102158	0.143796	0.0478049	0.202388	0.151939	0.122267	0.178276	0.00357143	0.0905797	0.132132	0.098986	0.121751	0.150849	0.125984	0.112639	0.159041	-0.0129496	0.0523627	0.0401338	0.195001	0.211628	0.0153664	0.154218	0.125818	-0.0292072	0.0392976	0.063197	0.0201954
55		0.0849057	0.0962241	0.169099	0.103894	0.199267	0.299845	-0.0322581	0.041769	0.290162	0.103383	0.221577	-0.0535714	0.0914689	0.160809	-0.0268511	0.0379117	0.0859873	0.212719	-0.0262664	0.0611621	0.0474122	0.111111	0.0246792	0.156627	0.157107	0.078203	0.198317	-0.0638298	0.156181	0.0972359	0.13157	0.0592885	0.104569	0.076175	0.168901	0.17284	-0.103448	0.0597403	0.101974	0.160301	0.182834	-0.00657501	0.189941	0.162618	-0.0126939	0.0135895	0.0826508	0.00401606
56		0.0163043	0.0871143	0.101329	0.115851	0.158946	0.335586	0.0945946	0.0307503	0.240569	0.105293	0.256344	-0.0011274	0.063932	0.115724	-0.0317848	0.0542373	0.0859291	0.145514	-0.00378788	0.162791	0.02533	0.101401	0.190148	0.152622	0.0854859	0.123355	0.116587	0.021978	0.15138	0.128542	0.108898	0.112994	0.15327	0.0380952	0.115739	0.0570825	0.0287356	-0.0509804	0.21562	0.180308	0.169088	0.00884956	0.137206	0.153907	-0.0176991	-0.00678158	0.0814928	-0.116919
57		0.0734694	0.0901865	0.15529	0.157192	0.169174	0.27027	-0.103448	0.172414	0.232486	0.10626	0.275102	0.0253165	0.0985075	0.169892	0	0.0309343	0.222159	0.199326	0.0760346	0.187097	0.10734	0.0272	0.0528376	0.160073	0.052568	0.0764174	0.144745	0.0203327	0.134228	0.118104	0.0852122	0.122563	0.053307	0.113985	0.167064	0.0995671	0.0489914	0.0989011	0.154229	0.143275	0.173365	0.00476758	0.154617	0.10028	-0.0841655	-0.046044	0.0147275	-0.0278515
58		0.0566298	0.118748	0.0231405	0.138412	0.14824	0.241614	-0.0545939	0.117048	0.30179	0.130635	0.247429	-0.0393975	0.0895837	0.131192	-0.035473	0.0230673	0.0750816	0.154535	-0.0457143	0.0858086	0.104281	0.13195	0.134208	0.168207	0.252241	0.130795	0.114094	0.120755	0.148984	0.0927602	0.0751001	0.0836879	0.131524	0.0639344	0.138001	0.1125	-0.0722892	0.129213	0.0642504	0.180601	0.246959	-0.0153031	0.112259	0.165304	-0.00288184	-0.0167362	0.0379939	-0.0408573
59		0.121127	0.0290221	0.0940767	0.141164	0.08626	0.279851	-0.0447761	0.131443	0.291485	0.132194	0.267981	0.0607991	0.0876309	0.105148	-0.0374787	0.0748428	0.161992	0.228751	0.0428164	0.0954774	0.0305709	0.127036	0.0174419	0.191195	0.169151	0.121311	0.13054	0.0522388	0.121662	0.159048	0.0767932	0.0277008	0.0894142	0.0659072	0.156133	0.186147	0.047041	0.0627615	0.149826	0.191654	0.128783	0.0321407	0.171269	0.132197	0.00892857	-0.0153728	0.0895296	-0.0101833
60		0.03678	0.103339	0.205575	0.14951	0.148172	0.258427	0.00271003	0.0298507	0.240125	0.0944423	0.262599	-0.0392157	0.0769827	0.187535	-0.0083612	0.0518283	0.165997	0.12	-0.149404	0.0324675	0.0677026	0.118151	-0.0447193	0.229299	0.142502	0.118812	0.176904	-0.037037	0.145293	0.168418	0.104866	0.159091	0.051243	-0.0122449	0.150911	0.276018	0.075	0.176978	0.026936	0.214837	0.192857	-0.0263158	0.0985865	0.186282	-0.0396476	-0.0296293	0.0591806	0.00211268
61		0.0069735	0.08608	0.278629	0.165902	0.114976	0.220421	-0.139785	0.0979381	0.256845	0.121176	0.223907	0.0352805	0.0618097	0.10231	-0.0118443	0.000623636	0.155272	0.161697	-0.00473037	0.0827815	0.137387	-0.00484262	0.0228401	0.291156	0.101789	0.166529	0.179227	0.075188	0.27417	0.168684	0.0814865	0.110795	0.0278351	0.0809444	0.133569	0.193473	0.0294574	0.189911	0.0815603	0.142521	0.161483	0.0368098	0.131136	0.185643	0.038806	-0.0126642	0.0874525	-0.164761
62		0.0419929	0.0624	0.137358	0.189884	0.162399	0.28234	0	0.208614	0.231076	0.0851439	0.250795	-0.00118483	0.0765941	0.109896	0.00084674	-0.00428397	0.111758	0.209007	-0.0230769	0.0416667	0.129008	0.07251	0.0992063	0.220382	0.171666	0.0811245	0.0465995	0.0964083	0.193595	0.161822	0.0884609	0.179641	0.105401	0.128645	0.18915	0.203661	0.0387597	0.159509	0.0225303	0.227879	0.194527	-0.00762463	0.0885529	0.121011	-0.0710227	0.03589	-0.011994	0.00344116
63		0.0369844	0.048835	0.184116	0.160783	0.177691	0.239505	-0.0109589	0.161725	0.203679	0.121825	0.232845	-0.0045977	0.109008	0.0878754	-0.105882	-0.033478	0.17613	0.16447	-0.0291262	0.111864	0.0791855	0.0880254	0.0569745	0.130489	0.19457	0.0727273	0.114233	-0.021978	0.277047	0.176559	0.0884986	0.112717	0.0749869	0.11414	0.171165	0.105727	-0.00940439	0.0611664	0.1019	0.143451	0.195652	0.0293589	0.108657	0.141193	-0.0286533	0.0134732	0.0551302	-0.00138122
64		0.0183099	0.0910846	0.160403	0.159798	0.187105	0.234065	-0.0607287	0.0642202	0.154707	0.111896	0.235053	0.00413467	0.0963285	0.122905	-0.0268398	0.0134839	0.165694	0.146651	-0.0247148	0.0769231	0.0642479	0.14377	0.0699507	0.266234	0.0677541	0.102649	0.100814	0.136276	0.127798	0.139181	0.0785861	0.0352941	0.0820189	0.192771	0.114165	0.0829493	0.126023	0.136164	0.136986	0.226273	0.198079	0.0342298	0.0998914	0.189071	-0.0161054	-0.0169426	0.0967251	-0.061445
65		0.0508721	0.055037	0.0699301	0.212761	0.114786	0.252966	-0.0659341	0.123324	0.170984	0.115576	0.240529	-0.0233645	0.0928571	0.163128	-0.0255144	0.0298129	0.155889	0.126304	-0.0578199	0.0886525	0.179546	0.0241352	0.0820669	0.211514	0.121019	0.183743	0.16646	0.12334	0.363572	0.180523	0.0540171	0.10275	0.0752351	0.0665543	0.132327	0.151659	-0.0432	0.115727	0.0777385	0.184187	0.166256	0.00787402	0.103725	0.207739	-0.123167	-0.091627	0.060698	0.0705882
66		0.0905141	0.0621762	0.200358	0.133361	0.1323	0.36967	-0.0246575	0.103896	0.205195	0.117682	0.213797	0.0464839	0.0500596	0.173591	-0.00584795	-0.0185476	0.113793	0.198157	0.00682927	0.12585	0.129637	0.0995951	0.192688	0.18926	0.0964912	0.0264901	0.187146	0.0282486	0.263808	0.145843	0.0893292	-0.0977654	0.055615	0.077686	0.113879	0.0900901	-0.105919	0.076259	0.0780142	0.229565	0.162011	0.0454545	0.164013	0.135484	-0.0352941	-0.0247699	0.0658307	0.0292276
67		0.0378682	0.0768233	0.247432	0.157917	0.130719	0.255491	0.0424597	0.0659489	0.188703	0.121536	0.234411	-0.0836278	0.0616357	0.163347	0.0552677	-0.0116572	0.171811	0.185912	0.0221328	0.103093	0.059764	0.103781	0.105477	0.196451	0.104413	0.133936	0.0691748	0.0480769	0.465627	0.121365	0.0741249	0.224784	0.0993022	0.0666667	0.154979	0.250585	-0.0108527	0.146789	0.0921986	0.166414	0.158084	0.00374532	0.0484467	0.113669	-0.100145	-0.0438041	0.0658208	-0.152635
68		0.0490196	0.0632184	0.222025	0.182285	0.143328	0.273756	0.0619718	-0.0127551	0.190661	0.0985241	0.210826	0.0264423	0.0868805	0.202741	-0.0584307	0.0252845	0.0792719	0.144502	0.0285714	0.285714	0.0163221	0.0608333	0.305035	0.21116	0.150908	0.0661157	0.283951	0.0588235	0.339007	0.139814	0.084763	0.0376812	0.106247	0.0893761	0.147353	0.154023	0.0268562	0.100287	0.147425	0.146081	0.140277	0.0427245	0.142165	0.12649	-0.0368189	-0.0367121	0.0927673	-0.118644
69		0.0326705	0.0582902	0.239819	0.183665	0.124877	0.31083	0.139501	0.0619236	0.205864	0.0608867	0.270371	-0.0531287	0.0367803	0.148526	-0.00171233	0.018403	0.143527	0.154865	-0.0295858	0.0719178	0.088685	0.0383048	0.119961	0.216164	0.0366232	0.134728	0.190505	0.0697674	0.174487	0.152426	0.0725184	0.0817236	0.0632369	0.0195759	0.177498	0.253521	0.0143541	0.048433	-0.0119454	0.18446	0.222222	-0.0259662	0.0697934	0.14052	-0.117117	-0.000887749	0.077044	-0.103448
70		0.0877944	0.0758886	0.19892	0.167096	0.155732	0.246489	0.0773639	0.119792	0.163754	0.0855211	0.188285	0.00789314	0.0512771	0.134378	0.0715503	-0.0256005	0.180964	0.146213	-0.00785855	0.0434783	0.0795326	0.102482	0.265265	0.202268	0.113892	0.129707	0.132282	0.00190476	0.328571	0.139798	0.0798623	0.0421348	0.0923318	0.0639386	0.186837	0.0762527	0.0110585	0.16932	0.1777	0.183107	0.177192	-0.0529557	0.0704435	0.164562	-0.0688141	-0.00465629	0.0063593	-0.0571222
71		0.128531	0.057846	0.212598	0.151918	0.161039	0.215952	0.0659026	0.111111	0.2394	0.0768322	0.247318	-0.104617	0.0831234	0.182796	0.0863121	0.0417451	0.137626	0.180807	-0.104816	0.122689	0.0923018	0.0458333	-0.018078	0.159148	0.15201	0.162869	0.201727	0.0757282	0.21466	0.113348	0.102995	0.119082	0.0721103	0.111298	0.122976	0.226852	-0.0826833	0.138418	0.0336283	0.199629	0.217228	0.00879397	0.0982329	0.215195	-0.0617647	-0.0663339	0.0392314	-0.00431344
72		0.0411724	0.0943517	0.16158	0.163016	0.147421	0.306549	-0.0112045	0.00795756	0.266968	0.0771951	0.221526	0.0323741	0.0584314	0.129032	-0.00750626	0.0437141	0.179457	0.110333	0.00986193	0.0358306	0.0608436	0.0994152	0.305689	0.268844	0.0851202	0.152397	0.151231	-0.0433145	0.497801	0.120443	0.0684149	0.113703	0.0656168	0.0450751	0.112212	0.208989	-0.0298273	0.0854701	0.0458404	0.225	0.162676	0.0189873	0.0963581	0.183813	-0.0380518	-0.0215727	0.0774246	-0.060276
73		0.0892351	0.069031	0.14461	0.172735	0.138253	0.25088	0.109195	0.0832232	0.19873	0.0885284	0.201004	-0.0657277	0.0602457	0.196388	-0.0743802	0.011509	0.157053	0.141865	-0.0907298	0.134021	0.107238	0.203627	0.050495	0.232399	0.11332	0.0926407	0.210942	-0.0546875	0.410426	0.123514	0.0899761	0.113043	0.0874486	0.0255102	0.176259	0.220721	-0.0315091	0.104435	0.194946	0.210543	0.144121	0.0606061	0.0953823	0.162503	0.00636943	-0.0655041	0.0404531	0.0893812
74		0.0422145	0.068323	0.180243	0.129521	0.177056	0.277528	0.0629371	0.0334672	0.219144	0.0534995	0.188495	-0.012926	0.0160796	0.192568	0.0463692	0.050237	0.150766	0.146886	0.011976	-0.189274	0.0370102	0.129139	0.158824	0.112615	0.0936088	0.166518	0.201187	0.0725191	0.273273	0.133947	0.10007	0.132565	0.0981818	0.0374688	0.158964	0.0666667	-0.124611	0.0753912	0.130435	0.158264	0.186032	-0.050995	0.127537	0.184609	-0.0403727	0.0777699	0.0916335	0.0725505
75		0.0336134	0.0936613	0.0548885	0.222198	0.188797	0.322769	0.0401146	0.0657895	0.249685	0.0756041	0.26526	0.0253623	0.0304646	0.16639	0.0822281	-0.0611057	0.0981492	0.131395	0.00988142	0.0644628	0.0835519	0.041425	0.0353982	0.192916	0.127673	0.06847	0.200969	0.0193424	0.406273	0.112507	0.100034	0.0713246	0.110993	0.0453782	0.127298	0.149321	-0.0015949	0.11855	0.114923	0.191874	0.207818	0.0579897	0.117523	0.143599	-0.0609756	-0.059389	0.0652353	-0.0598977
76		0.0626703	0.045568	0.107424	0.189201	0.0752071	0.305794	-0.0204678	0.102703	0.19826	0.0664873	0.140621	0.0207962	0.0622292	0.121979	0.088968	-0.0063857	0.155984	0.144543	0	-0.0292599	0.124668	0.127273	-0.0307845	0.177522	0.0969856	0.114286	0.155131	0.0170455	0.514541	0.148154	0.0837065	0.111765	0.0425311	0.0630473	0.129534	0.11804	-0.0430622	0.0341064	0.156194	0.213892	0.185621	-0.00510856	0.0866693	0.167231	0.0124224	0.0464714	0.0982941	0.0885886
77		0.0341064	0.0743541	0.138354	0.207899	0.182947	0.311667	-0.158038	0.0986667	0.153119	0.097669	0.204727	0.0157576	0.0835962	0.145577	0.0299401	0.0086594	0.132462	0.141003	-0.0485437	0.0584416	0.123545	0.0860034	-0.0778443	0.184906	0.188202	0.144075	0.100058	-0.0115385	0.41629	0.0926387	0.107619	0.0903874	0.0696492	0.0496215	0.213885	-0.185501	0.00156986	0.163324	0.108772	0.205692	0.163431	0.000644745	0.120606	0.144964	-0.0306748	0.0652487	0.0243902	-0.123795
78		0.0953717	0.0508055	0.178947	0.187778	0.207674	0.313752	0.00808625	0.104195	0.157373	0.0415639	0.273543	0.0209455	0.0561146	0.0926234	0.0209556	0.0631922	0.122286	0.151728	-0.0149254	-0.0497592	0.0893054	0.227599	0.0234146	0.210526	0.0990033	0.12693	0.249553	-0.145488	0.355908	0.0980962	0.0844354	0.0824891	0.114315	0.128834	0.185933	0.062635	0.0339506	0.133523	0.229706	0.136035	0.180645	-0.0077821	0.159717	0.147768	-0.0143541	0.0512281	-0.0197044	-0.0237548
79		0.00895934	0.10665	0.213904	0.175916	0.153669	0.292615	-0.0153417	-0.0430809	0.197262	0.106283	0.232915	-0.0192771	0.0373349	0.135965	0.0506757	-0.0121251	0.125212	0.151943	-0.018393	-0.00494234	0.0494608	0.0968801	-0.00486855	0.300258	0.156436	0.151877	0.150798	-0.0134357	0.285714	0.130728	0.102325	0.0321678	0.138116	0.100253	0.101706	0.087963	-0.0965732	0.00591716	0.108475	0.228814	0.133504	-0.0109184	0.108973	0.106352	-0.00949367	0.111712	0.0348343	0.0999225
80		-0.0209885	0.00331825	0.108772	0.20339	0.122614	0.30061	0.00571429	0.0916129	0.211337	0.102663	0.267366	-0.0209205	0.0572135	0.152599	0.0834753	0.0148053	0.168876	0.138298	0.0149254	0.0706076	0.0611028	0.115029	0.0109671	0.16129	0.185455	0.0322034	0.141705	-0.00571429	0.294479	0.147793	0.113082	0.0847953	0.0929635	0.0325342	0.129219	0.163636	-0.0917874	-0.0284939	0.107527	0.185016	0.218709	-0.017341	0.0808809	0.159556	-0.0479233	0.0777598	0.0980392	0.0479817
81		0.0623306	0.0357793	0.166084	0.248847	0.140859	0.300902	0.0261348	-0.0382653	0.189189	0.0884275	0.191914	0.0431611	0.0252449	0.109244	0.073294	0.0239095	0.0600227	0.163615	0.0287984	0.0344828	0.0392793	0.126538	-0.0480864	0.198989	0.126359	0.134764	0.109195	0.0368932	0.209567	0.157255	0.0932874	0.163959	0.0377261	0.111859	0.150209	0.0454545	-0.0252366	0.0322148	0.145798	0.180793	0.207647	-0.0521628	0.126301	0.136276	0.022293	0.0942199	0.0280374	0.00456621
82		-0.0074983	0.055916	0.213175	0.191798	0.127981	0.268092	0.101744	0.135417	0.198502	0.106209	0.267387	0.000592768	0.0499146	0.115449	-0.0203735	-0.0195576	0.146877	0.116528	-0.0726916	0.0808081	0.0187707	0.134251	0.0220441	0.256558	0.111556	0.120733	0.202662	-0.129094	0.226749	0.100805	0.0494037	0.142037	0.0307773	0.0292599	0.151515	0.24537	-0.0361068	0.0945559	0.0666667	0.1787	0.203934	-0.0578298	0.108298	0.131505	-0.122481	0.0900233	0.0616776	-0.034965
83		0.0237467	0.0950477	0.113656	0.214824	0.0790312	0.283532	0.0883978	0.0752394	0.197775	0.0272135	0.2804	0.0273159	0.0283781	0.105522	0.0178723	0.0305564	0.157303	0.12198	0.0268123	0.0333333	0.0330639	0.130508	-0.107075	0.221384	0.0993746	0.0692568	0.106918	0.0563107	0.303147	0.0656304	0.0824654	0.0817791	0.109497	0.156794	0.160924	0.2287	-0.0773994	0.0110497	0.0171821	0.157237	0.131406	0.0309973	0.122244	0.188696	-0.0638978	0.0684761	-0.0275689	0.0647482
84		0.0541667	0.138094	0.141379	0.176471	0.139347	0.333149	0.00864553	0.155616	0.198556	0.0682171	0.278281	0.018641	0.0463154	0.115427	-0.0150754	0.0307145	0.126398	0.19646	0.035124	0.0868056	0.101545	0.185714	0.0579268	0.196262	0.111551	0.0852321	0.155889	0.00396825	0.271595	0.104469	0.068907	0.0182328	0.146652	0.126197	0.177531	0.18018	0.0337079	0.0235784	-0.0135135	0.134884	0.191235	0.0269906	0.0672032	0.128977	-0.00321543	0.0832481	0.0280851	-0.00949367
85		0.0113258	0.0967148	0.120281	0.197112	0.153694	0.288045	0.118065	0.0828877	0.189763	0.0770706	0.292867	0.0197905	0.0413193	0.207843	0.127178	0.0630689	0.202999	0.145199	-0.062753	0.0968801	0.0509483	0.13181	0.0730731	0.162178	-0.032571	0.117498	0.216216	0.0632411	0.266259	0.118216	0.0902873	0.115607	0.12268	0.0980052	0.0777856	0.203579	-0.094703	0.129944	0.0238095	0.119086	0.204375	0	0.108004	0.154271	-0.0677419	0.0940883	0.035443	-0.11271
86		0.0378007	0.0858015	0.120975	0.194456	0.138643	0.260223	0.145833	0.215789	0.174017	0.0808446	0.252861	0.0299824	0.10013	0.146328	0.106599	-0.00512492	0.123437	0.112281	-0.0766208	0.0921273	0.0482059	0.106667	0.000984252	0.152709	0.174946	0.14359	0.10828	0.00384615	0.295652	0.10642	0.0155116	-0.0155148	0.0936061	0.129678	0.115345	0.232816	-0.0744849	0.0947666	0.117857	0.159008	0.212567	-0.00198807	0.153956	0.172505	-0.0305085	0.0664984	0.0633131	-0.0493344
87		0.0708447	0.104186	0.106126	0.163062	0.0550488	0.280065	0.132948	0.0568475	0.111768	0.0780866	0.273025	0.0401396	0.0320349	0.146754	0.0223325	-0.0432817	0.148127	0.162872	0.0503018	0.00487805	0.0551351	0.0194585	-0.011846	0.152828	0.142256	0.118846	0.14024	-0.0499002	0.321848	0.114759	0.0922947	0.138418	0.0506912	0.0834065	0.156537	0.116883	0.00308642	0.00265957	-0.0207612	0.185705	0.244595	0.0223426	0.110976	0.143677	-0.0605565	0.0685988	0.0667838	-0.00236407
88		0.0253333	0.0790419	0.152042	0.206723	0.160052	0.337745	-0.0876712	0.147849	0.156945	0.071224	0.318093	-0.0453242	0.0401025	0.0944662	0.0220713	0.0117188	0.183352	0.180896	-0.043956	-0.0673575	0.0291472	0.0702055	0.000996016	0.115942	0.0391506	0.149525	0.118316	-0.0263158	0.295686	0.111338	0.0867347	0.187773	0.119537	0.0817717	0.127311	0.192825	0.104478	0.159341	0.157522	0.133467	0.195138	-0.0300546	0.0839048	0.141637	-0.0734095	0.0490328	0.0783615	-0.0574163
89		0.00135685	0.0905288	0.163572	0.176059	0.116476	0.276256	0.0840336	0.111688	0.175652	0.0744741	0.261453	-0.00921659	0.0367392	0.112472	0.0142977	-0.0104918	0.147836	0.113835	-0.00876339	-0.078905	0.0811605	0.0158996	-0.0643275	0.189448	0.154167	0.160136	0.13083	-0.0936902	0.417384	0.116478	0.0786249	-0.0331492	0.067214	0.0267472	0.0579019	0.0508475	0.0015748	0.17852	0.0152284	0.133131	0.183196	-0.0697674	0.113211	0.169736	0.0331126	0.087852	0.0210526	-0.0167331
90		-0.0137345	0.0916717	0.132819	0.195228	0.0914887	0.264509	0.0583215	0.102757	0.141317	0.0815939	0.205647	-0.0131805	0.0136637	0.0679825	0.0520134	-0.0656841	0.0845987	0.111496	0.0467662	0.0684039	0.0367139	0.0596085	-0.0502463	0.174171	0.0405046	0.211141	0.0764967	-0.0594796	0.332801	0.107095	0.0855387	0.111111	0.0591208	0.0302013	0.190377	0.0550847	-0.0287443	0.221591	-0.0502431	0.13096	0.253793	-0.0100739	0.102796	0.139571	-0.103448	0.120239	0.0547703	0.0550534
91		0.0506156	0.0536044	0.143847	0.172959	0.126554	0.31087	0.121037	0.125668	0.122936	0.0804155	0.296161	-0.0856481	0.0460922	0.152412	0.0704698	0.0202482	0.187572	0.197861	-0.0218069	0.0679934	0.144227	0.0864528	-0.0538071	0.141183	0.0228532	0.108936	0.0420639	-0.0134357	0.174297	0.119709	0.109292	0.152047	0.0285714	0.0558899	0.167257	0.18931	0.00321543	0.104828	0.14652	0.138408	0.0259136	-0.00681199	0.119152	0.125223	-0.010453	0.109205	0.0894737	-0.059919
92		0	0.0689549	0.0950764	0.12222	0.222585	0.219836	0.113043	0.161804	0.118203	0.0528938	0.262576	0.00926999	0.0184382	0.179825	-0.044898	0.0148579	0.138514	0.111502	-0.0525273	0.00689655	0.12172	0.0553191	-0.159804	0.228975	0.0209601	0.130667	0.0561674	0.0585938	0.218225	0.113028	0.0911546	0.00289017	0.0119979	0.0333618	0.166549	0.195506	-0.0593607	0.0589849	0.0877797	0.159189	0.183702	0.00608519	0.125333	0.150494	-0.0553746	0.127943	-0.0195035	0.057047
93		0.047619	0.116948	0.0532446	0.167665	0.124307	0.236898	0.0886767	0.0580645	0.199284	0.0600924	0.223069	-0.0129432	0.0793474	0.218662	-0.0252649	-0.0436782	0.142369	0.161816	-0.0669291	0.0285714	0.050396	0.158079	-0.0568862	0.115663	0.0499287	0.110162	0.0951586	0.0374753	0.334125	0.0554827	0.08835	0.0630372	0.10363	0.0946065	0.0867294	0.167401	-0.100304	0.138418	0.145299	0.140333	0.180807	-0.0451787	0.0649141	0.147763	-0.00684932	0.149907	-0.0224138	0.00482315
94		0.0240642	0.141615	0.0871441	0.167739	0.14026	0.210583	0.0140449	0.109067	0.194444	0.0903767	0.221156	0.00115207	0.0664452	0.174085	0.0824129	-0.0648508	0.106622	0.191539	-0.0243408	-0.00500835	0.0504018	0.128295	-0.0776794	0.135673	0.016415	0.0677966	0.0968109	-0.00571429	0.35815	0.146671	0.118002	0.066092	0.0807388	0.12234	0.106823	-0.0460526	-0.0917431	0.127778	0.0413793	0.209655	0.187332	0.0178817	0.11609	0.161525	-0.0721649	0.104927	0.0122592	-0.0402629
95		0.00672948	0.112898	0.00425532	0.174644	0.192737	0.208797	0.066482	0.132316	0.153055	0.0528736	0.218932	-0.0223496	0.0567812	0.115385	0.0438379	0.0601747	0.149554	0.164875	0.0684647	-0.033557	0.0630176	0.053407	-0.111221	0.103211	0.0732394	0.18811	0.0899944	0.0268199	0.218153	0.11893	0.0993778	-0.0281879	0.0356958	0.0344219	0.0984348	0.124726	-0.0247678	0.0574099	0.105925	0.10573	0.138833	-0.0601758	0.0648925	0.0865578	-0.0834753	0.132409	0.0781671	-0.0344249
96		-0.00596421	0.0691785	0.0853242	0.195638	0.168814	0.246353	0.0491329	0.0487484	0.124036	0.0578418	0.275119	-0.00289519	0.106446	0.133221	0.0586265	-0.0700514	0.111857	0.11919	0.0587002	0.13468	0.0152174	0.0465729	-0.0517241	0.0826011	0.0351482	0.191529	0.121759	-0.0383142	0.445418	0.143028	0.0737434	0.139633	0.0437072	0.105579	0.0945715	0.271028	-0.1146	0.0729023	0.0241379	0.174747	0.111421	-0.030843	0.139511	0.167335	-0.0577933	0.110837	0.0645161	0.0177815
97		-0.0204082	0.0712546	0.177318	0.146862	0.19276	0.259076	-0.0069735	0.0570652	0.135167	0.0755725	0.282121	0.0303384	0.0543037	0.107641	0.0792839	-0.0151956	0.16953	0.15625	-0.00613497	0.0795848	0.0425379	0.0216998	0.0241206	0.220133	0.105762	0.216771	0.146259	0.140039	0.366174	0.116763	0.0798991	0.0301291	-0.0312997	0.0829016	0.100829	0.0825688	-0.0795107	0.0629371	0.0618557	0.132423	0.129897	-0.00814111	0.0918094	0.138106	-0.00840336	0.0989844	0.0983607	-0.0378913
98		0.0431849	0.0441889	0.135462	0.140564	0.189103	0.169501	-0.0599455	0.036635	0.13769	0.058067	0.210848	0.0429159	0.0697589	0.094195	0.0408674	0	0.101842	0.16866	-0.0430328	0.13961	0.112477	0.0960352	-0.154762	0.179487	0.129591	0.207414	0.174785	0.00924214	0.379777	0.11734	0.0705408	0.0469417	-0.0167715	0.0843585	0.151408	0.121622	0.0610932	0.146479	-0.0149254	0.128847	0.169574	0.0550847	0.114959	0.199182	-0.118056	0.111726	0.0314233	-0.0489221
99		0.00986193	0.0850476	0.176268	0.14102	0.220328	0.213459	0.0168539	0.102426	0.134524	0.105385	0.271745	-0.0213011	0.0749817	0.107641	0.079967	0.0280862	0.127869	0.150898	0.00203252	0.0440457	0.0877944	0.0289982	-0.105108	0.142857	0.175872	0.189041	0.109589	0.0268199	0.422185	0.157457	0.0946404	0.092219	-0.0178384	0.0376068	0.126009	0.0818182	0	0.0965035	0.0225303	0.173437	0.192442	0.0233838	0.124589	0.184662	-0.0994941	0.124349	0.0968326	0.0989583
100		0.0666667	0.0759804	0.0491257	0.183997	0.19279	0.18611	0.0293706	0.00129032	0.0876351	0.0864526	0.23669	-0.00928074	0.0691778	0.131019	0.0168675	-0.0135048	0.179318	0.117096	-0.0255885	0.101639	0.164103	0.127753	0.0234216	0.187952	0.115674	0.131532	0.0680923	-0.0134357	0.255777	0.133511	0.0772906	0.0606488	-0.0221286	-0.0356832	0.101653	0.143498	-0.0676923	0.111409	0.0842491	0.147303	0.102351	0.0200415	0.11405	0.193402	0.0205479	0.129834	0.04	0.0641574
101		-0.0142303	0.126648	0.0599156	0.244562	0.0912596	0.209817	-0.00831025	0.0906631	0.158824	0.0268431	0.180907	0.041816	0.112691	0.180442	0.0566968	0.028206	0.214206	0.0933014	-0.0208333	0.0550918	0.0886894	0.0770609	0.00501505	0.183116	0.0986745	0.0831099	0.046603	-0.0568182	0.338849	0.118207	0.109365	0.105413	0.065252	0.0625	0.103331	0.108046	-0.0323625	0.143243	0.112263	0.180546	0.132924	0.0271399	0.107808	0.222222	-0.049236	0.0835278	0.00740741	-0.003367
102		0.0078329	0.0594331	0.0524563	0.233246	0.159767	0.137996	0.08	0.0241287	0.141504	0.07098	0.276948	-0.0350877	0.0742024	0.0141612	0.0473029	0.0638012	0.111597	0.104179	-0.0458333	0.0315091	0.0947748	0.138967	-0.0367347	0.172414	0.029533	0.165455	0.0634371	-0.150735	0.406352	0.10514	0.104681	0.00859599	-0.0122536	0.00174825	0.14712	0.143519	-0.0430622	0.0472222	0.0606586	0.147461	0.152235	0.0147368	0.134985	0.176592	-0.110744	0.063685	0.0764925	0.0649573
103		0.0551905	0.0401949	0	0.197332	0.194813	0.186395	0.0505618	0.151915	0.113703	0.0593432	0.262069	0.0409836	0.0771727	0.159977	0.0113636	0.0243261	0.136925	0.0972222	0.00525762	-0.0327869	0.137001	0.0283688	-0.0763285	0.0301597	0.102256	0.0615385	0.156517	0	0.442088	0.155728	0.0694772	0.136364	0.0774059	-0.0109336	0.133148	0.101512	-0.0689127	0.12381	0.0356537	0.180952	0.139258	-0.0195804	0.097817	0.177863	-0.0955631	0.0889826	0	0.0696309
104		0.0441661	0.0994188	0.0458404	0.209792	0.0986988	0.197814	0.0493653	0.111111	0.152818	0.0532975	0.249401	0.00287191	0.0801794	0.162069	0.0379538	0.0467197	0.18408	0.163484	-0.0684647	-0.00657895	0.0837509	0.0585009	-0.0884422	0.101675	0.0444601	0.167558	0.0836699	-0.037594	0.431596	0.169431	0.0688668	0.0605187	0	0.0147441	0.107888	0.207729	0.0015949	0.0909091	0.0747826	0.112864	0.164306	0.061693	0.082397	0.119722	-0.137056	0.080183	0.081106	-0.04
105		0.0121717	-0.019328	0.110169	0.141771	0.157328	0.240884	0.0308989	0.13307	0.163121	0.0466933	0.176893	0.00882872	0.0770905	0.0743243	0.0902954	0.0604559	0.147778	0.109175	-0.0123711	0.134948	0.10192	0.149489	-0.0374494	0.174123	0.0541516	0.095698	0.045025	-0.0269231	0.501213	0.157957	0.0882553	0.12931	0.080786	0.0865299	0.0952045	0.144144	-0.0783699	0.0632911	0.0696095	0.159368	0.0955679	0.0354108	0.129968	0.146441	-0.00875657	0.111038	0.0539033	-0.00513699
106		0.12689	-0.0105202	0.0499562	0.208611	-0.133294	0.228595	0.0677966	0.0143791	0.06613	0.0483994	0.231656	-0.0456674	0.108206	0.184935	0.032636	0.0119522	0.141304	0.0932106	0.0408602	0.0283806	0.0786042	0.146089	-0.16092	0.0961877	0.0643154	0.16129	0.126728	0.0664062	0.59557	0.134205	0.0734177	0.10365	0.0931744	-0.033101	0.127522	0.0421286	0.0175439	0.00135501	0.117949	0.104056	0.185507	0.00287356	0.188213	0.198396	-0.0216606	0.0895981	0.0782779	-0.0395956
107		0.0347044	0.0740631	0.0645161	0.234767	0.16019	0.264292	-0.0181818	0.201072	0.0715123	0.0414498	0.217252	-0.0503764	0.0588026	0.152446	0.0607083	-0.0402619	0.156916	0.124337	-0.0790021	0.0378913	0.0838345	0.116652	-0.104016	0.161137	0.0985724	0.140271	0.081422	-0.0496183	0.440705	0.122709	0.0393596	0.065123	0.115824	0.101604	0.118917	0.195402	-0.105919	0.113889	-0.0689655	0.166135	0.0609418	0.0118138	0.140074	0.184259	0.0268336	0.0919412	-0.0356473	-0.0733788
108		0.0241042	0.095224	0.0236887	0.204618	0.0796899	0.248058	-0.0186514	0.0390625	0.0483871	0.0757663	0.222399	0.0462633	0.0788609	0.126745	0.0125945	-0.015832	0.190899	0.112941	-0.0518672	-0.037415	0.0541228	0.0766355	-0.15748	0.163337	0.0182309	0.164444	0.152386	-0.0664137	0.442997	0.154568	0.0716689	0.0403458	0.0791053	0.106498	0.130156	0.167048	0.0189274	0.00414938	0.0274914	0.132762	0.142651	0.0474168	0.117191	0.146776	-0.0696864	0.106922	0.0437209	-0.138815
109		0.0303422	0.149481	-0.0175439	0.227214	0.0588235	0.200771	0.0468085	0.10616	0.108605	0.051472	0.1932	-0.0487665	0.0573638	0.118818	0.039529	0.0288867	0.162891	0.100406	-0.0251572	-0.00334448	0.0600782	0.071753	-0.10099	0.171377	0.0429363	0.129663	0.160227	-0.0493097	0.451876	0.148296	0.120302	0.0983146	0.0545455	0.0426458	0.114326	-0.0829694	-0.0311526	0.0726552	0.0790378	0.0935714	0.130496	0.0394922	0.133963	0.158672	0.0437956	0.0542781	0.114898	-0.0170404
110		0.0755208	0.135825	0.0781116	0.178857	0.110564	0.210324	0.0352941	0.113757	0.0346788	0.0693224	0.231638	0.0300885	0.0476876	0.0870536	-0.0176322	0.0129702	0.167206	0.0903721	0.0212089	0.0294627	0.0769784	0.03125	0.0154162	0.17063	0.0653951	0.100358	0.183033	0.0301811	0.529317	0.150616	0.0573013	0.00872093	0.0668103	0.0637916	0.108128	0.0748899	-0.14375	0.027248	-0.00175131	0.120603	0.0961263	-0.00140845	0.0927524	0.161967	-0.062167	0.0376389	0.0548723	0.0143113
111		0.0594452	0.195033	0.114583	0.237404	0.135916	0.167019	-0.0287278	-0.0603015	0.0440324	0.0652974	0.270588	0.0195382	0.0510844	0.118943	0.0558376	0.0971808	0.134844	0.145933	-0.0175801	0.0496689	0.054258	0.132597	-0.116371	0.126341	0.0416667	0.0907473	0.130878	-0.0389105	0.5168	0.169896	0.0949645	0.131852	0.129207	0.0754386	0.108967	0.0607477	-0.0202808	0.0262069	0.0601093	0.157593	0.0659107	0.0329041	0.121636	0.151665	-0.0654545	0.00985678	0.0985626	0.0508167
112		-0.00452489	0.102077	-0.0191827	0.19905	0.0566417	0.127399	-0.0220994	0.058663	0.101685	0.087057	0.204999	-0.122063	0.0611369	0.137853	0.0450751	0.0520194	0.144681	0.0926999	-0.00630252	0.0152801	0.103901	0.102262	-0.0998043	0.0696095	0.0524843	0.0786914	0.105499	-0.0229885	0.544058	0.125338	0.0612591	0.0809249	0.0405983	0.0142602	0.110166	-0.0313152	-0.105023	0.0501319	0.153846	0.161781	-0.127479	0.066474	0.131985	0.164673	0.00546448	-0.0164761	0.0851888	-0.0141093
113		0.0136808	0.117891	0.0985915	0.22646	0.192283	0.23366	-0.0247934	0.0863874	0.194727	0.0722404	0.0942797	-0.0220674	0.104634	0.137656	-0.00502513	-0.0749838	0.138246	0.108922	-0.0209205	0.0430464	0.0761974	0.118519	-0.0474308	0.153396	0.0355191	0.0679612	0.11828	-0.0171756	0.5136	0.128675	0.039038	0.0817791	0.0206522	-0.0210526	0.122832	0.0810811	-0.0479233	-0.0146082	0.0191972	0.193933	0.0614693	0	0.0393068	0.197732	0.0912477	0.00560768	0.0801187	0.108656
114		0.0356448	0.112951	0.057725	0.255012	0.138196	0.130576	-0.0955056	-0.00131406	0.203359	0.0623539	0.221187	-0.0788863	0.0524608	0.127109	-0.012285	-0.0461737	0.109333	0.045957	-0.0134995	0.00338983	0.137396	0.0838651	-0.122469	0.169451	0.0508711	0.107939	0.189785	0.0255403	0.622533	0.159321	0.0349835	-0.00439239	0.126449	0.0625567	0.070743	0.0480549	-0.025641	0.0248366	-0.0276817	0.142341	0.11437	0.0222541	0.0839532	0.197431	-0.0187266	0.0556046	0.00587084	-0.0535558
115		-0.0112063	0.0374742	0.0229885	0.211609	0.0358346	0.218615	-0.0670315	0.0605653	0.183962	0.0118095	0.205914	0.104029	0.0584058	0.166475	0.0634391	-0.0116589	0.165677	0.0931459	0.0116897	0.02589	0.121612	0.110909	-0.174825	0.230224	0.0745209	0.0611888	0.181714	0.00594059	0.550712	0.134815	0.045447	-0.00557103	0.0113945	0.0604148	0.111031	0.032967	-0.0664606	0.12076	-0.0222985	0.144111	0.174271	0.0561151	0.133855	0.180052	-0.0116279	0.0271436	0.102692	-0.0388437
116		-0.028123	0.129349	0.0507309	0.198285	0.0988751	0.198795	-0.00711238	0.0989305	0.19764	0.0236787	0.214248	-0.0128205	0.0412353	0.167617	0.0351759	0.000656168	0.135602	0.0337602	-0.0123711	-0.0135135	0.121577	0.0841908	-0.0995935	0.119104	-0.0083045	0.127337	0.214161	0.131474	0.589619	0.135231	0.0995133	0.0890805	0.101862	0.114667	0.125852	-0.0528541	-0.0410095	0.0262069	-0.0274914	0.110631	0.133086	0.0237924	0.150649	0.161833	-0.0164534	0.026044	0.191992	0.0719557
117		0.0300704	0.128743	0.0786325	0.197743	0.152326	0.20796	-0.0326241	0.12381	0.0848057	-0.00113507	0.214648	-0.0202622	0.0752423	0.200921	0.00429923	-0.00886117	0.128595	0.0714701	0.0448718	-0.013245	0.0638298	0.102954	0.0751073	0.106184	0.02764	0.112108	0.139284	-0.111546	0.540765	0.162447	0.0227198	0.0632184	0.071085	0.0558659	0.174071	0.0669746	-0.00632911	-0.0604891	-0.0490018	0.177065	0.109105	0.0525537	0.0933333	0.170859	0.0264151	0.00402093	0.135025	-0.0182815
118		0.00858086	0.0987507	0.101124	0.20043	0.15104	0.164571	0.0678211	0.149457	0.100618	0.0435613	0.171294	-0.0728242	0.0669243	0.136287	-0.0267559	-0.0519224	0.0760928	0.077193	-0.0136126	-0.0372771	0.140422	0.136861	-0.106786	0.119131	0.0578985	0.0949821	0.22093	-0.0554493	0.4911	0.143026	0.0293548	-0.00847458	0.0840611	0.0183727	0.123243	0.0232558	-0.0733229	0.0159574	-0.00888099	0.12253	0.115124	-0.0382979	0.0858762	0.165114	-0.104972	0.0805013	0.156923	-0.025878
119		-0.0248883	0.0470238	0.0505226	0.222511	0.192561	0.194135	0.0608204	0.0311688	0.105691	0.0576077	0.179129	-0.0393423	0.0669291	0.1435	-0.0359231	-0.0763708	0.104541	0.0578231	-0.031893	-0.049505	0.115244	0.113553	0.0142566	0.104839	-0.0340042	0.0292294	0.130884	-0.0453649	0.562859	0.181791	0.0524934	0.103858	0.0915216	0.0506329	0.160819	0.0135135	-0.0529695	-0.121372	0.0645724	0.151757	0.10073	0.0634573	0.0724638	0.178201	-0.0259259	0.0398747	0.0782178	-0.156966
120		0.0467532	0.17969	0.0718039	0.233232	0.14877	0.153281	0.0201149	0.172131	0.073368	0.0426504	0.0817244	0.0225653	0.0576102	0.063571	-0.000843882	-0.0429309	0.183432	0.0274372	0.0393013	-0.00500835	0.0964207	0.0603843	0.0150754	0.0760302	0.0593705	0.15669	0.170448	-0.054902	0.434466	0.141051	0.0155089	0.146589	0.13564	0.0482257	0.12	0.0223214	-0.0126582	0.033241	0.040293	0.105513	0.179289	0.0669643	0.0878497	0.182891	-0.148624	0.0812033	0.0656863	-0.0327869
121		0.0375648	0.125528	0.0689362	0.259554	0.168125	0.209607	0.0715328	0.0921053	0.107832	0.0030349	0.163265	-0.0219065	0.0717209	0.12479	0.063228	-0.00699068	0.154821	0.0591614	-0.0431125	0.0423012	0.118681	0.0875233	0.0887949	0.0344432	0.091922	0.108179	0.120231	-0.0438247	0.585346	0.0936709	0.0429809	0.035868	0.127479	0.00711744	0.105187	0	0	0.0244565	-0.0314685	0.0580029	0.300161	0.0366643	0.0451389	0.165866	0.0135922	0.046091	0.0225873	-0.0777676
122		0.0731383	0.0991909	0.0500835	0.221932	0.241645	0.19567	-0.0697013	0.188679	0.0573034	0.0347648	0.176685	0.0166865	0.0859516	0.137255	0.0354978	-0.0880999	0.163577	0.0724985	-0.0289389	-0.0167785	0.108918	0.0934066	-0.214649	0.0789779	0.002772	0.0581093	0.100517	-0.0826772	0.479933	0.124469	0.0577852	-0.0114943	0.0665176	0.0638298	0.110469	0.119266	-0.0402576	0.0501393	0.0922242	0.125691	0.208398	-0.0611511	0.0885463	0.178211	-0.0715596	0.0713228	0.133544	-0.0564663
123		0.0038961	0.128083	0.0538194	0.236594	0.205063	0.144993	0.0126582	0.0684211	0.0788429	0.0512099	0.137255	0.0459492	0.0599929	0.110864	0.0572917	0.0103627	0.101402	0.039489	-0.0626993	0.00684932	0.0869095	-0.00841908	0.0965665	0.0816445	0.0475524	0.0763766	0.207746	0.0120968	0.614094	0.107873	0.0335526	0.00584795	0.0241493	0.0597826	0.0838756	0.0272727	-0.0548387	0.0107239	0.12204	0.176816	0.209155	0.0371991	0.0830214	0.133113	-0.137255	0.0830748	0.126117	-0.0920354
124		0.019685	0.137538	0.0404127	0.256969	0.104908	0.16056	-0.0231214	0.115903	0.0864339	0.0503928	0.214286	0.00660661	0.106932	0.054525	-0.00511073	-0.0314465	0.151348	-0.00347625	0.028754	-0.0202703	0.130783	0.0793072	0.0497835	0.139896	-0.000696379	0.155235	0.229865	-0.00587084	0.688725	0.163942	0.0741483	0.158055	0.0629139	0.091922	0.0798088	0.171429	-0.0251572	0.0583446	0.0584071	0.130435	0.209454	-0.00507614	0.050212	0.152067	0	0.0483061	0.0676085	0.102197
125		0.0199468	0.127896	0.108963	0.265519	0.150199	0.154884	0.0499287	-0.039267	0.110583	0.0576336	0.0676572	0.0200608	0.075519	0.140251	-0.0271647	-0.0462351	0.17988	0.0238636	-0.0170576	-0.0274914	0.108861	0.12594	-0.119048	0.0596252	0.0462833	0.141083	0.21729	-0.0717131	0.696702	0.14343	0.0132057	0.0192024	0.039604	0.0061674	0.0703717	-0.0401786	-0.111465	0.157319	-0.00544465	0.15215	0.234727	-0.0319465	-0.00866474	0.159535	0.0213592	0.100285	0.167343	0.0656371
126		0.0688963	0.132031	0.0343643	0.27104	0.215019	0.190489	0.0502959	0.0871935	0.129088	0.0389317	0.166487	-0.0429003	0.0952722	0.149347	0.0947368	0.0751312	0.115092	0.0664336	-0.0141458	0.0669014	0.075703	0.124294	-0.0103734	0.167658	0.0277778	0.123576	0.172825	0.0204918	0.561389	0.11319	0.0648498	0.0491803	0.0994941	0.0863971	0.141489	0.133971	-0.176839	-0.042641	0.0420475	0.16844	0.113725	0.0458992	0.0673529	0.153131	-0.0155039	0.055915	-0.0106075	0.100379
127		0.0435931	0.135247	0.0678414	0.267073	0.1806	0.142318	0.00292398	0.105556	0.0414067	0.017636	0.0818898	-0.0168472	0.136339	0.128702	0.0702055	-0.0227948	0.122087	0.0237406	-0.0454545	0.00333333	0.126781	0.042898	-0.140121	0.0815155	0.120118	0.0327144	0.211202	0.0165289	0.641148	0.0851323	0.0706603	0.0785498	0.118421	0.0719557	0.0722406	0.117783	-0.0291262	-0.0489418	0.0123894	0.0755265	0.0741024	0.00595238	0.0946163	0.152593	-0.0877193	0.0914478	0.142857	-0.0838095
128		-0.00711054	0.0997015	0.0351328	0.262946	0.154238	0.150589	0.0710059	0.0591398	0.133566	0.053874	0.206638	-0.0465257	0.0626557	0.195962	0.0418118	0.0922559	0.133518	0.0135693	0.0492881	-0.0186125	0.0803929	0.138227	0.0520723	0.0849598	-0.00634697	0.0956211	0.116914	-0.00208768	0.638774	0.144961	0.00815661	0.0437406	0.10022	0.0597015	0.0800874	0.0208817	-0.102107	-0.0175439	0.0645161	0.149925	0.12176	0.0607903	0.0752152	0.1448	0.0923077	0.102057	0.0694301	0.122137
129		-0.0175896	0.114889	-0.0497051	0.25147	0.193904	0.179084	0.0100719	0.0948509	0.0972053	0.0761596	0.189867	0.00489596	0.101583	0.147708	-0.061296	0.0275908	0.152979	0.0167533	-0.0888889	-0.0328152	0.127898	0.128913	0.0934479	0.149038	0.00420463	0.140255	0.212158	-0.0356394	0.82546	0.140109	0.0526662	0.0739065	0.074115	0.131332	0.0920335	0.0497512	-0.0167785	0.0500677	0.0224719	0.111356	0.192338	0.0764618	0.0637044	0.18783	-0.00578035	0.0832137	0.0643863	-0.0674157
130		0.00723208	0.0815675	-0.0142096	0.261088	0.140277	0.161574	-0.00600601	0.191667	0.106306	0.0538669	0.220899	-0.0430171	0.106751	0.248362	0.0161002	-0.0297226	0.0817334	-0.0100771	0.00327869	-0.062069	0.0918257	0.0852273	0.0877573	0.0796253	0.0118632	0.111913	0.246291	-0.0208333	0.636587	0.125485	0.0814419	-0.130045	0.116227	0.0847145	0.0887816	0.0536585	-0.0394737	0.0921596	0.161049	0.135503	0.203484	0.0289193	0.0643354	0.20005	0.00193424	0.140573	0.121212	-0.0099728
131		0.00998004	0.0406504	0.0216076	0.260638	0.192219	0.159946	0.156442	0.0747922	0.0626118	0.0824207	0.216396	-0.0323368	0.101506	0.113879	-0.04	-0.0118969	0.148459	0.0135693	-0.0482315	-0.0855148	0.0656399	-0.00740741	-0.00217865	0.0708383	0.0412587	0.181159	0.200238	-0.0580913	0.847826	0.13691	0.0710098	0.0568356	0.0476731	0.107407	0.0870206	0.0121655	-0.0693739	0.0541311	0.156309	0.142003	0.208267	0	0.0581263	0.213157	0.0238095	0.0859063	0.0378323	-0.0514286
132		0.0488294	0.0699565	0.0529974	0.161542	0.165105	0.118162	-0.0175439	0.109354	0.0322581	0.0590944	0.17027	-0.0231144	0.105187	0.224787	0.0297723	-0.00831117	0.126235	0.0190703	-0.0891515	-0.170139	0.116108	0.142593	0.0107066	0.145833	0.0363636	0.102862	0.19349	-0.0661157	0.61312	0.14435	0.0518494	-0.0372578	0.0463801	0.003663	0.0979098	0.104072	0.0462046	0.042524	0.148855	0.147541	0.126715	0.0778816	0.0480814	0.215557	-0.03125	0.0798413	0.0662526	-0.0116054
133		0.0545213	0.0636417	0.116321	0.250329	0.204466	0.114549	-0.00574713	0.0564516	0.0405244	0.0699557	0.176409	-0.0489596	0.0913978	0.180737	-0.00346021	-0.0478375	0.0032538	-0.00978699	-0.00109529	0.0328152	0.0878877	0.0735849	0.0980392	0.0316638	0.0542083	0.0482456	0.154896	-0.0343434	0.741026	0.144969	0.0635185	0.0830861	0.0832868	0.0520548	0.0988523	0.0214797	-0.0373984	0.0028169	-0.0092081	0.11531	0.164763	0.0323552	0.0896714	0.154118	0.0136452	0.0822914	0.00505561	-0.108593
134		-0.0541272	0.0284207	0.0884354	0.208462	0.176587	0.121171	0.0272597	0.135501	0.0600707	0.0480549	0.174447	-0.0282555	0.12313	0.16221	-0.0395189	-0.037	0.0674582	-0.017524	-0.0152838	-0.121622	0.0405007	0.109665	0.0879479	0.127144	0.105783	0.16726	0.229548	0.00623701	0.845047	0.180302	0.124118	0.0948012	0.076223	0.0273723	0.178259	0.118329	-0.0226537	0.0728291	0.137615	0.143638	0.175788	0.0673813	0.101145	0.203581	-0.0257426	0.103914	0.037422	-0.0223048
135		-0.0134228	0.0369048	0.0752879	0.269785	0.193591	0.159589	0.0964912	0.109875	-0.0274372	0.0497322	0.189278	-0.0489771	0.131593	0.0793651	0.0625551	-0.00235215	0.122087	0.00352526	-0.0676692	-0.107692	0.0421286	0.0803059	0.0720524	0.062029	0.0429185	0.11426	0.155985	-0.0398323	0.767123	0.151399	0.117748	0.13125	0.120829	0.0127273	0.0703183	0.0917874	-0.0564784	0.119883	0.0996016	0.0944613	0.19611	0.0316456	0.1298	0.226184	-0.0439771	0.0955935	0.106522	0.0461847
136		0.00468855	0.0897628	0.154982	0.263842	0.116608	0.135816	-0.0678466	-0.00680272	0.0783242	0.0263056	0.197931	-0.02	0.0989848	0.124925	0.0441696	-0.0562643	0.106453	0.0519481	-0.0322928	-0.104377	0.0369004	0.0557129	-0.072479	0.0772861	0.0317125	0.070018	0.162291	-0.147773	0.820449	0.107889	0.117607	0.113497	0.0945559	-0.00636943	0.150436	-0.0321101	-0.0159744	-0.0576923	-0.00722022	0.137579	0.236515	0	0.0184077	0.179925	0.114286	0.140685	0.174006	0.0333016
137		-0.00472654	0.0450075	0.0544157	0.25157	0.158782	0.156362	0.0341753	0.0543933	0.0100413	0.0134512	0.149111	-0.0621118	0.0748962	0.185275	0.0371681	0.0299562	0.128291	0.0377804	-0.0922747	0.0159292	0.0438952	0.141199	-0.138365	0.0670487	0.0733096	0.129118	0.16066	-0.0217391	0.698888	0.131197	0.0957684	-0.00914634	0.0531023	0.0148148	0.171998	0.264781	-0.0807249	0.0906555	0.127413	0.103421	0.168465	0.00623053	0.0675105	0.196438	0.0843882	0.108313	0.131959	-0.0642648
138		0.056101	-0.0222089	0.0767857	0.261926	-0.0411711	0.0941504	-0.0397644	0.120332	0.001772	0.0464348	0.0779014	-0.0204588	0.091074	0.1279	0.0800352	-0.0726968	0.154913	0.0351819	-0.00679502	-0.0253623	0.0622656	0.0674264	0.0226293	0.0783242	0.0966811	0.0490633	0.135398	0.012766	0.825193	0.131693	0.10416	0.0120482	0.091419	0.0202206	0.091528	0.0271605	-0.114754	0.0811594	0.0891841	0.151324	0.22753	0.0869212	0.0786309	0.182692	0.0965092	0.114995	0	-0.119924
139		0.0121951	0.138713	0.138462	0.225552	0.137318	0.121897	0.0214067	0.0529172	-0.03561	0.101185	0.149457	0.00251889	0.0793885	0.148527	0.0379747	-0.0211388	0.118083	0.0740518	0.0422857	0.0607143	0.0401753	0.03861	-0.0647858	0.0720562	0.0549607	0.0748422	0.113241	-0.0482456	0.635135	0.185209	0.126867	0.0197869	0.0454042	0.0220183	0.100674	0.181818	-0.0897227	0.0236439	0.0393996	0.134729	0.201954	0.0355987	0.0966825	0.186684	-0.0224949	0.134895	0.0873362	0.0267943
140		-0.014966	0.0996134	0.125448	0.285778	0.121202	0.190584	0.0429448	0.182584	0.0740291	0.056973	0.174257	-0.0196078	0.0521361	0.125225	0.0483729	-0.105949	0.0453274	0.0575409	0.00566251	-0.053913	0.111449	0.133588	-0.0209644	0.15	0.0683945	0.121771	0.187932	-0.112474	0.901015	0.11423	0.120708	0.0509554	-0.0193548	0.0422535	0.124903	0.0449173	-0.0136054	0.0823864	0.0368932	0.127522	0.209226	0.0846395	0.0736138	0.168401	-0.0247934	0.120077	-0.00107066	0.00684262
141		-0.00809717	0.111179	0.141825	0.263274	0.190492	0.095777	0.00895522	0.142458	0.040146	0.0434955	0.208469	-0.0646388	0.0818414	0.12626	0.0542222	0.0694259	0.0508096	0.0671551	-0.0886918	0.0297723	0.0675676	0.156159	-0.0525188	0.0921986	-0.0154278	0.0640569	0.0906921	0.0364026	0.57265	0.128054	0.129088	-0.0391236	0.0611778	-0.0182815	0.0966744	0.065	-0.0454545	0.0397727	0.0684411	0.125299	0.191745	0.0432692	0.114149	0.204108	0.0848861	0.0978457	0.00113766	-0.0509615
142		0.0339674	0.08742	0.020372	0.186262	0.201964	0.152448	0.0626866	0	0.0156627	0.0678233	0.229638	-0.0307982	0.0609645	0.124384	-0.0362511	0.0627154	0.103604	0.00948992	0.0528634	-0.189916	0.0428944	0.152896	-0.0246253	0.0946992	0.126185	0.050173	0.149494	-0.0322581	0.966841	0.146545	0.123953	0.119497	0.0194769	0.0214753	0.0883895	0	0.0334448	-0.0515464	0.0331384	0.0928571	0.160069	0.0585443	0.06569	0.161808	0.0472279	0.121556	0.103911	-0.0299807
143		-0.056195	0.062954	0.0729073	0.260713	0.136738	0.14588	0.0757576	0.0743802	0.146505	0.079151	0.219016	-0.0113208	0.099635	0.109102	-0.00914077	-0.0631684	0.131429	0.089451	-0.0432852	0.0427046	0.114019	0.118156	0.0260022	0.0486936	-0.0113154	0.1141	0.169005	-0.00659341	0.76219	0.134694	0.166081	0.0850722	0	0.0378578	0.123552	0.00261097	-0.00664452	0.0169014	0.10495	0.072837	0.0960265	0.082391	0.099858	0.171046	-0.138075	0.0893403	0.126106	0.0455426
144		0.113506	0.13138	-0.0180505	0.280418	0.0461947	0.113517	-0.036036	0.146628	0.0165485	0.0569969	0.228816	0.00253485	0.0976778	0.160418	0.0392694	-0.0596562	0.0673289	-0.0280932	-0.0500556	-0.132867	0.0832702	0.0920304	0.00545852	0.106357	0.0406977	0.146893	0.106715	0.0242826	0.897854	0.104003	0.121248	0.0407524	0.0464716	0	0.0616808	-0.057072	-0.0190641	-0.0394161	0.0498084	0.118245	0.136986	0.0432	0.0877026	0.189989	-0.018711	0.159688	0.142857	-0.0146484
145		0.046832	0.0798915	0.0815217	0.24835	0.14531	0.135452	-0.111272	0.110799	0.138821	0.079031	0.20044	-0.0403023	0.0455904	0.156671	-0.0107143	-0.0239622	0.145339	0.0458937	-0.0649065	-0.132867	0.0856292	0.0488281	-0.0387931	0.0730198	0.0323508	0.0491803	0.169533	-0.123644	0.561059	0.1225	0.114138	0.0664557	0.0205714	0.151685	0.163296	0.194103	-0.00680272	-0.0526316	0.0441459	0.145774	0.189374	0.0226904	0.110575	0.173547	-0.0308008	0.144965	0.0899123	-0.0673367
146		0.0359613	0.098217	0.104371	0.242081	0.12569	0.0982787	-0.0121951	0.110795	0.13087	0.0379697	0.186337	0.00446713	0.0689144	0.12858	0.0198198	0.0524535	0.120917	0.0747375	-0.113122	0.00562852	0.0800299	0.0645161	-0.111342	0.141127	-0.0197513	0.0561178	0.0376776	0.0684327	0.904557	0.0890767	0.122801	0.0612903	0.0623557	0.047259	0.156916	0.157623	0.03	-0.167382	-0.102515	0.101723	0.234043	0.0863192	0.126926	0.197245	0.0727651	0.142927	0.0896861	0.0871369
147		-0.0265363	0.0978723	0.0801457	0.263062	0.227527	0.0933558	0.00309598	-0.043956	0.171717	0.0712463	0.142287	-0.0127551	0.0320886	0.144593	-0.0521583	-0.0446518	0.138051	0.0376776	0.0309989	0.00729927	0.0952562	0.176699	0.0274424	0.117183	0.00576369	0.0728597	0.158354	-0.0364026	0.670819	0.111332	0.165403	0.0444444	0.0828986	0.020794	0.0624763	0.0294118	0.0189983	0.0437318	-0.027451	0.129771	0.157179	0.0605565	0.0715835	0.138193	-0.025641	0.0998128	0.00776915	-0.0296827
148		-0.0306834	0.117576	0.100276	0.267001	0.0670927	0.155041	-0.0739645	0.139971	0.0955882	0.0656616	0.150783	0.0715215	0.0786305	0.167079	-0.0146789	-0.0532524	0.130584	0.0215916	-0.00898876	-0.0892532	0.0532588	0.0474806	0.0144124	0.138075	-0.0240113	0.0986175	0.152091	-0.0371991	0.903419	0.0949851	0.103883	0.0379747	0.0453488	-0.0235627	0.169782	-0.0201005	0.0548673	0.0424929	0.083004	0.127931	0.0843373	0.042623	0.1093	0.190712	-0.0658436	0.0869223	0.0307167	-0.0694165
149		0.0391608	0.121362	0.107241	0.21515	0.184755	0.152446	-0.0283159	0.110803	0.0656753	0.0773525	0.183333	-0.00965873	0.0800898	0.125989	-0.0654867	-0.069407	0.103051	0.00120192	0.0282486	0	0.0875093	0.116397	-0.054721	0.12477	0.0730253	0.0955882	0.0487072	-0.0495495	0.792388	0.17821	0.143662	-0.0761905	-0.0151515	0.15507	0.114729	0.163728	-0.0729167	0.00973574	0.0953347	0.120888	0.217235	0.08646	0.0823755	0.164361	0.0191083	0.0762477	0.0444444	0.0103627
150		0.0438413	0.100367	0.104261	0.307317	0.157663	0.125182	-0.00625	0.09299	0.0934809	0.0749004	0.218156	-0.025641	0.106008	0.134496	0.0207021	-0.0421666	0.139401	0.0417966	0.00465116	-0.195804	0.0945427	0.155425	0.0130862	0.0394265	0.0524017	0.0238971	0.0881084	0.0327103	0.93739	0.152221	0.130632	-0.031746	-0.0557185	0.019685	0.140541	-0.0892019	-0.108475	0.0353982	-0.0254403	0.0700165	0.192205	0.0754098	0.124303	0.169301	-0.139442	0.0949748	0.0270856	0.0142857
151		0.0287719	0.125118	0.0548446	0.257925	0.128303	0.079687	0.0195489	0.0704225	0.0969773	0.0965943	0.215006	0.00640205	-0.0129726	0.11883	0.0504125	-0.0280568	0.0869812	0.0614313	0.0380623	-0.113475	0.12	0.141434	-0.0742358	0.139178	0.0379182	0.0471785	0.0885922	-0.0225225	0.713793	0.173639	0.108118	0.149351	0.0968123	0.111776	0.146457	0.128866	-0.0200669	0.085554	0.0781563	0.110553	0.158911	-0.0498774	0.0946206	0.175294	0.0273684	0.0889334	0.00803674	-0.0383065
152		-0.123533	0.111929	0.0589286	0.245646	0.245533	0.0738802	-0.0368664	0.110791	0.103448	0.121157	0.216928	0.00777202	0.0800985	0.161529	-0.0140598	-0.0304899	0.0603102	0.109827	0.027088	0.0984848	0.118644	0.0378274	0.0702948	0.115012	0.105302	0.0769231	0.236068	-0.0456621	0.994012	0.157739	0.151754	0.0937997	0.00715137	0.0502901	0.111717	-0.0574163	-0.0233393	0.0186514	-0.0316206	0.0866274	0.165622	0.0848896	0.108283	0.185061	-0.0897155	0.114033	0.114078	0.0491118
153		-0.00701262	0.100184	0.096475	0.253327	0.245563	0.0738334	0.0349206	0.16	0.0416157	0.143959	0.192083	-0.0557335	0.088081	0.147826	-0.0446194	0.00912281	0.107692	0.00691389	-0.130435	0.0126582	0.112039	0.027027	-0.163198	0.155583	0.00215983	0.0796626	0.105882	-0.0526316	0.8329	0.121385	0.127629	0.145215	0.0519556	0.0532663	0.115446	0.0918635	0.0017331	0.0254958	0.107884	0.0908316	0.166957	-0.012366	0.130329	0.195628	-0.012766	0.113782	0.125146	0.0532787
154		-0.0197952	0.132075	0.128015	0.234983	-0.0116141	0.133591	0.0153374	0.0659026	0.112791	0.126198	0.157951	-0.0301475	0.0724638	0.17764	0.019469	-0.0667599	0.110462	0.100448	-0.0183486	-0.0145455	0.0844582	0.0367063	0.0810185	0.132832	0.048012	0.12758	0.0943396	0.0176991	0.867139	0.124894	0.107961	0.0703764	-0.0666667	-0.0513069	0.169872	-0.100478	-0.121107	0.0666667	0.0769231	0.107311	0.105943	-0.0512821	0.0771484	0.164179	0.0396476	0.0975625	0.0805687	-0.038342
155		0.0275229	0.133758	0.0375235	0.210027	0.0678617	0.117821	-0.0106707	0.263158	0.138558	0.0879905	0.207803	0.00923483	0.0960854	0.0916717	0.00274977	-0.0321903	0.111751	0.0558376	-0.0531287	-0.0656934	0.117512	0.040856	0.0440678	0.111042	0.0159212	0.0793651	0.0681234	-0.0511628	0.818023	0.15	0.118899	0.0578512	0.00888099	0.0416667	0.155715	-0.00249377	-0.0596491	0.0244604	0.0313725	0.0960549	0.110333	0.0173697	0.0900196	0.204722	-0.0280778	0.135095	0.0568319	-0.144667
156		0.0119298	0.120975	0.132216	0.204058	0.222442	0.091018	-0.0262751	0.114659	-0.0134474	0.0732303	0.208943	0.0690335	0.121281	0.158287	0.00720721	-0.00626523	0.149941	0.0925335	-0.154453	-0.00763359	0.100728	0.0702811	-0.0588235	0.11083	-0.0182371	0.124883	0.0834387	0.0580357	0.738747	0.0974411	0.139116	0.0764228	-0.0100771	0.0912698	0.136202	0.160494	0.029877	-0.0487805	0.0717131	0.0922166	0.143354	0.00656814	0.0933137	0.21269	-0.0408602	0.13392	0.0998797	0.0460526
157		-0.00423131	0.105823	0.10325	0.233914	0.0417469	0.129272	0.0194903	-0.0114613	0.0796686	0.104006	0.16235	0.0524917	0.0932331	0.0924891	0.0791629	0.0378151	0.133492	0.0727745	0.0210773	-0.0494297	0.0806016	0.0427011	0.111905	0.0806154	0.104006	0.106742	0.0464081	-0.0138249	1.01056	0.163957	0.141687	-0.00331126	-0.0859564	0.00908174	0.0813953	0.0533981	-0.0662021	0.0564972	0.0728745	0.109699	0.217937	0	0.124596	0.191531	-0.190987	0.12514	0.0607477	-0.0636943
158		0.0372977	0.090399	0.103122	0.238605	0.14869	0.119516	0.131122	0.0778098	0.0613267	0.0875912	0.195	0.0796813	0.0763128	0.0422195	0.000904977	-0.0524488	0.145759	0.0733886	-0.032491	-0.0383142	0.0824981	0.0658683	0.0983982	0.02	0.018546	0.0767841	0.146184	0.00460829	0.816697	0.134576	0.103535	-0.0801964	-0.0325581	-0.0450623	0.0738523	0.104712	0.0918728	0.17134	0.138075	0.0891424	0.224307	-0.00753138	0.117293	0.197387	-0.0886076	0.122835	0.112455	0.0213675
159		-0.0552061	0.0492308	0.128015	0.204949	0.173653	0.109774	0.101911	0.0863836	0.122104	0.0635438	0.208499	0.00668449	0.0952923	0.146699	0.0438675	-0.0510276	0.154306	0.044795	0.0273484	0.0733591	0.0508604	0.043043	0.0225922	0.0463415	0.0721649	0.0796296	0.19057	-0.0352941	0.601656	0.149965	0.0669738	0.0971993	-0.0306306	0.0435644	0.137637	0.108861	-0.0224525	-0.00290698	0.101449	0.108988	0.21147	0.0346577	0.102	0.183697	0.0168067	0.103063	0.0374707	-0.0180276
160		-0.0708215	0.148963	0.0988806	0.214002	0.206434	0.0766478	-0.108067	0.156627	0.108159	0.0751895	0.0902487	-0.00133511	0.11294	0.15874	0.0330882	-0.0836569	0.126506	0.100715	0.0512515	0.0313076	0.0645161	0.0850202	-0.0834273	0.0983506	-0.0512624	0.046832	0.149303	0.109589	0.889925	0.163586	0.134636	-0.0618893	0.052127	0.0307845	0.0749803	0.171717	-0.0404218	0.10951	0.0735586	0.127257	0.130985	-0.00990099	0.0720878	0.120269	0.0512249	0.0995703	0.125763	-0.102128
161		-0.0150322	-0.00940249	0.0378578	0.245979	0.25474	0.130408	-0.0276873	0.0901034	0.0841362	0.0970498	0.1878	0.0302623	0.0723258	0.0273973	-0.01732	-0.0533526	0.139241	0.111989	-0.030303	0.0651341	0.135725	0.0634441	-0.0470852	0.110972	0	0.118299	0.0970626	0.137615	0.798731	0.138181	0.0996217	-0.011236	-0.0439952	0.0488798	0.109257	-0.024	-0.0273973	0.042735	0.0269151	0.104321	0.054386	0.0321489	0.064275	0.147756	-0.130435	0.0910131	0.0873786	-0.107404
162		0.00285307	0.0421217	0.110066	0.240745	0.202822	0.0812934	0.0466238	0.0224719	0.0737387	0.073141	0.184685	-0.0493333	0.0335291	0.0476796	-0.0242537	0.00429492	0.158672	0.0292994	-0.0297265	0.0243902	0.065158	0.107362	0.0400943	0.116221	0.0624025	0.11491	-0.0103493	-0.0139535	0.98916	0.158773	0.124133	0.121464	-0.0179856	0.0983118	0.202293	0.0343008	0	0.0690691	-0.0163265	0.0974225	0.0873786	0.00670017	0.0573441	0.232102	-0.00662252	0.103882	0.0340633	-0.0636943
163		-0.0336134	0.178774	0.144762	0.262035	0.186791	0.0941353	0.101307	0.139013	0.141528	0.0154096	0.138234	-0.0215633	0.0480661	0.0705809	-0.033667	-0.0606379	0.176826	0.0746269	-0.0628571	-0.0391061	0.0816327	0.059387	-0.0388571	0.0761421	-0.00754717	-0.0178404	0.0787956	0.0531178	0.722736	0.1306	0.117815	0.125828	-0.0641872	0.0280561	0.0850722	-0.0335917	-0.10453	0.111446	0.109208	0.0862944	0.135088	0.0368509	0.118034	0.15649	-0.0431034	0.103119	0.0307503	0.10022
164		-0.017316	0.112888	0.0885122	0.255814	0.160152	0.100889	-0.00157978	0.0362845	0.14361	0.0582645	0.19756	-0.0149051	0.101254	0.116719	0.0450782	0.0205505	0.134845	0.0539311	0.0234742	0.0332103	0.0309682	0.0301811	-0.0311419	0.0979644	0.0311284	0.0120259	0.100584	-0.0414747	0.805581	0.16798	0.116514	0.0228013	-0.018641	0.0609874	0.0815085	0.172973	-0.0157068	-0.00842697	0.10559	0.154844	0.0977578	-0.0124896	0.0271643	0.14229	-0.0349345	0.108203	0.122072	-0.055371
165		0.0137981	0.0798969	0.0889541	0.217988	0.0891156	0.152326	-0.0434783	0.0903522	0.210027	0.049525	0.114439	0.0273224	0.106432	0.15836	0.0309278	-0.0993521	0.114929	0.0790698	0.00968523	-0.0630975	0.0553124	0.0834171	-0.0429733	0.0718789	0.0199387	0.0832554	0.0851334	0.0405728	0.569811	0.181595	0.125634	0.120419	-0.00181488	0.0840932	0.037037	0.117647	-0.0855148	0.0508982	0.0566038	0.0882605	0.112664	-0.0349878	0.050899	0.189378	0.0403587	0.103209	0.0918114	-0.0240964
166		0.00221402	0.0448799	0.118217	0.233365	0.0278597	0.127058	-0.030303	0.174114	0.176	0.0645229	0.201886	0.00542741	0.0859375	0.132362	0.0200191	-0.0550091	0.0527578	0.0202747	-0.137441	0.118321	0.0854392	0.024565	-0.086758	0.0536398	-0.0015873	0.173383	0.118689	0.0234742	0.884826	0.151441	0.125617	0.0975207	-0.0135135	0.112277	0.0235153	0.0809399	-0.0467626	0.0439883	0.0740741	0.0827586	0.0725157	0.136519	0.0955316	0.169378	0.0645161	0.144057	0.191763	0.0135135
167		-0.00438596	0.07968	0.0646388	0.238004	0.178273	0.170747	0	0.0412979	0.173497	0.0839439	0.209234	-0.109589	0.104256	0.119798	0.0120037	-0.125625	0.00236407	0.0308197	0.0966184	-0.0877863	0.101276	-0.0182556	-0.0224852	0.106675	0.0379338	0.0561798	0.153034	-0.0232558	0.807763	0.0952631	0.132711	0.013289	0.0462107	0.105425	0.0690776	-0.0880829	-0.158076	0.0247453	-0.0102249	0.0479068	0.125224	0.047373	0.106233	0.218139	0.0465632	0.147322	-0.010989	-0.10846
168		-0.019174	0.0866345	0.0111732	0.20537	0.166258	0.117073	-0.0380165	0.0971599	0.22807	0.0566903	0.150387	-0.117608	0.121611	0.0752688	0.0698565	-0.100579	0.0708181	0.0310078	-0.077381	0.0641509	0.0516693	0.153925	0.00578035	0.0394984	-0.0227095	0.169492	0.0887881	-0.133787	0.953832	0.12319	0.106004	0.0228013	0.0192666	0.0653266	0.0742251	0.0111732	-0.0695187	0.0855457	0.0912779	0.0767911	0.125348	0.0856658	0.0702427	0.203545	-0.0176991	0.0990523	0.103015	-0.0823271
169		0.0131772	0.0824211	0.0901961	0.187902	0.06521	0.18309	0.0015949	0.0060423	0.113456	0.10929	0.133665	-0.0370879	0.0610163	0.0852018	-0.00967118	0.0565611	0.0303767	0.0188925	-0.106079	0.0579151	0.104334	0.0900196	0.00471698	0.0429293	0.116129	0.15739	0.101684	-0.0934579	0.935956	0.170123	0.112019	0	0.0288115	0.0452261	0.0841625	0.146067	0.00189753	0.0574374	0.0714286	0.0523583	0.123118	0.0538721	0.0865034	0.262226	0.0177778	0.0763409	0.185279	-0.122517
170		-0.0141264	0.102187	-0.0103872	0.24514	0.120314	0.123313	-0.082391	0.0626866	0.0669317	0.133487	0.171296	-0.0365769	0.105284	0.123977	0.0621359	-0.0935673	0.0264941	0.0652463	0.034398	0.00963391	0.0478873	0.019019	0.0761671	0.156595	0.0282575	0.0931796	0.0790885	0.147132	0.559259	0.127298	0.118367	-0.00347222	-0.0944976	-0.00308325	0.122195	0.170868	-0.0110701	-0.0549777	0.0982143	0.0616645	0.139823	0.0727903	0.112743	0.165788	-0.0590909	0.0565405	0.051186	-0.0777778
171		0.0036846	0.169666	0.0742527	0.232771	0.170571	0.109787	0.0666667	0.0738462	0.0965564	0.116153	0.146087	-0.0366275	0.143646	0.11283	-0.047081	-0.0347633	0.09125	0.110215	-0.00245098	-0.106299	0.0515794	0.0590551	0.0238949	0.0733542	-0.0156006	0.0420954	0.140397	0.0809524	0.952821	0.129548	0.107888	-0.0386555	-0.0295567	0.00704935	0.0460008	0.159664	0.0536044	0.0058651	-0.0890688	0.0509219	0.135426	0.0179028	0.0681171	0.204651	-0.039627	0.0752869	0.035409	-0.132973
172		0.00301659	0.167424	0.0200573	0.220779	0.136608	0.119509	-0.0502431	0.107256	0.120158	0.0870833	0.144279	-0.101626	0.119062	0.112238	0.0245283	0.0440957	0.0981366	0.0574555	-0.0646766	-0.0635838	0.117	0.131474	0.0665054	0.0666667	0.0619048	0.114878	0.120261	-0.2	0.62212	0.154729	0.0638607	0.0551724	-0.0801223	-0.0151362	0.053005	0.126437	-0.0271248	-0.0392749	0.0646552	0.11267	0.149321	0.0559441	0.120466	0.166261	-0.0762332	0.0453553	0.0316056	-0.0300334
173		0.0127532	0.125522	0.0471607	0.195045	0.148473	0.161063	-0.0554622	0.0173913	0.124236	0.144596	0.157093	-0.04	0.0428655	0.125323	0.0910834	-0.0387947	0.0939086	0.0899108	-0.016129	0.0604839	0.117286	0.0861723	-0.0083632	0.100588	0.0244287	0.079096	0.128484	-0.0870588	1.00089	0.110286	0.0950193	0.118166	-0.00878294	0.0183673	0.086286	-0.0196078	0.0126582	0.011976	0.0808511	0.106887	0.206166	0.105263	0.0939948	0.234294	0.00456621	0.0532165	0.0501836	-0.0798226
174		0.100076	0.145942	0.0365385	0.248627	0.17542	0.15614	0.0689076	0.0856269	0.119723	0.134791	0.176125	-0.0435986	0.1124	0.110537	0.000931966	-0.109963	0.0928482	0.0714286	-0.054678	-0.0298211	0.113029	-0.0174002	-0.0989523	0.0312301	0.0780142	0.0922931	0.0127602	0.002457	0.720293	0.10255	0.158662	0.0190641	0.00252845	0.0769231	0.0316667	0.174419	0.00900901	0.0518293	0.0585683	0.107895	0.0532011	0.0713012	0.0522792	0.164267	-0.0748299	0.0752241	0.00887199	-0.0887185
175		-0.00884956	0.151435	-0.0354331	0.253621	0.1444	0.135048	-0.00486224	0.0548148	0.198013	0.05907	0.210496	0.0069735	0.0882412	0.106959	0.0238322	-0.0060423	0.0812121	0.0327422	0.0698254	-0.163065	0.103114	0.200403	-0.159404	0.0327133	0.134087	0.109448	0.0845839	0.0447059	0.702526	0.188183	0.129267	-0.0868825	-0.0377242	0.0990807	0.080361	0.0388889	-0.0128913	-0.0143678	0.107692	0.132509	0.0875576	0.0207075	0.063463	0.18267	0.088785	0.00883672	0.0899609	0.0229358
176		-0.00975244	0.112275	0.0494665	0.189964	0.148438	0.102171	0.0710572	0.216981	0.154334	0.111627	0.172129	0.0519573	0.0832996	0.135279	0.0736842	-0.0272459	0.107615	-0.0782198	-0.0585305	-0.0325048	0.0645425	0.0456349	0.0890841	0.0343234	0.0600649	0.118447	-0.0073776	-0.0462287	0.84022	0.156334	0.0764107	0.03125	-0.0402516	0.0197095	0.0765391	0.129944	0.0550285	0.0485133	0.0410367	0.0841284	0.0452899	0.0377524	0.0936932	0.239659	0.00943396	0.02294	0.162673	-0.00540541
177		0.0222222	0.125455	-0.0184645	0.216078	0.123404	0.132461	0.0111643	-0.00909091	0.101871	0.145793	0.115137	0.0128205	0.0684169	0.0402556	0.0120482	-0.0394345	0.104232	0.0798635	-0.0248139	0.00198807	0.13033	0.129388	-0.0960854	0.152497	-0.013986	0.116809	0.0026738	-0.0747664	0.585821	0.130764	0.0379234	0.0275862	-0.0782502	0.110169	0.0375427	0.0604396	0.0226415	-0.0490342	-0.0229645	0.112517	0.145738	0.0158172	0.0639854	0.221431	-0.0484988	0.0520216	0.0524968	0
178		0.0091047	0.0824882	-0.033557	0.264859	0.121014	0.0734063	0.0737564	-0.0909091	0.0515759	0.128942	0.112804	-0.0650805	0.0680902	0.0638012	0.0867925	-0.114447	0.119048	0.0480769	-0.0614806	-0.0584677	0.144523	0.0110331	0.0464548	0.101139	0.0317331	0.103846	0.152975	-0.0487805	1.00362	0.165315	0.0683137	-0.0162162	-0.012955	0.0700104	0.0576114	0.0541311	0.0875233	0.0121581	-0.0507726	0.114311	0.0784672	0.0341297	0.107407	0.150207	-0.0917431	0.0713526	0.0536829	-0.0573951
179		0.0478395	0.107166	0.026393	0.258762	0.160708	0.131918	0.0824742	0.0639626	0.0373961	0.0862987	0.190741	-0.0796586	0.0685259	0.0497678	0.13561	-0.0245171	0.0768246	0.0577465	-0.00383142	-0.0205761	0.105132	0.0278884	-0.0512515	-0.00190476	-0.00708104	0.0077821	0.148906	-0.0277778	0.867675	0.151745	0.0868664	-0.238579	-0.031407	-0.0136411	0.0765939	0.144509	-0.042471	0.0670732	0.0425056	0.0615522	0.192884	0.0132861	0.0872698	0.207122	-0.0217918	0.0786023	0.119266	0.0271547
180		0.101382	0.105541	-0.0912621	0.17762	0.134844	0.0995916	0.102521	0.110754	-0.0351617	0.109819	0.138708	0.0313837	0.148321	0.119893	0.0522167	0.0297619	0.114504	0.0122951	0.0291508	-0.053719	0.0816158	0.105425	0.0638298	-0.014791	0.0309194	0.101167	0.0869268	-0.0175439	0.830668	0.163497	0.0763068	-0.0513274	0.0200753	0.0052687	0.0544161	-0.0840108	0.0301887	0.0381679	-0.107692	0.0972973	0.192237	0.0131694	0.0138345	0.127134	-0.0202247	0.0984566	0.169271	-0.0445434
181		0.00612557	0.103836	0.082	0.207311	0.122871	0.0999681	0.0171821	0.0868167	-0.048951	0.14391	0.101345	0.0318021	0.0948875	0.0671053	0.0146915	-0.0164179	0.0911425	0.00699301	-0.031941	-0.122807	0.126466	-0.0647059	0.0059453	0.0783533	-0.0485133	0.124756	-0.0238411	0.0573566	0.8551	0.134199	0.155607	-0.0367776	-0.0773994	0.00851064	0.0958315	0.110482	-0.0592734	0.11353	0.0932755	0.0663058	0.220974	0.0758377	0.0664574	0.194717	-0.0440835	0.11236	0.10616	-0.0247191
182		0.0907656	0.138472	0.0297619	0.273843	0.0592914	0.141931	0.0443686	0.0764431	-0.0364146	0.0867957	0.180158	-0.0077193	0.0629713	0.0473684	0.120792	-0.0377853	0.112811	0.0570021	-0.0151134	-0.102616	0.126466	0.0298507	0.0679852	0.0867876	0.0397405	-0.00189394	0.0884451	-0.0791367	0.471331	0.119956	0.107129	0.0108696	-0.0595533	0.128095	0.0675733	0.0397727	-0.0681818	0.0436187	0.0130435	0.0827206	0.215722	0.0881834	0.0489474	0.172655	-0.127273	0.109507	0.0431373	-0.0845714
183		0.107981	0.0282486	0.0681587	0.20805	0.136685	0.100255	0.0135593	0.0694006	0.0747331	0.11053	0.181021	-0.0576369	0.141272	0.111699	0.138716	-0.00452148	0.0349563	0.127168	0.0428016	-0.0315789	0.0691511	0.0768473	0.0702179	0.117177	0.0334148	0.0196078	0.0590631	-0.0821256	0.990637	0.120275	0.103951	-0.0335097	-0.102804	0.0706638	0.141481	0.159159	-0.244275	-0.00949367	0.0825688	0.0562694	0.202627	0.128945	0.0081859	0.18711	-0.0167064	0.109916	0.0563204	-0.108645
184		-0.0966258	0.0464564	-0.00397614	0.213522	0.098966	0.179538	0.0747331	0.0551948	0.070901	0.0802565	0.177223	-0.0189781	0.110645	0.0619946	0.131334	-0.00788584	0.0970626	0.0887978	0.034134	-0.00198807	0.0836486	0.0257681	-0.0209102	0.167575	0.0162338	0.0489182	0.00880162	0.0419753	0.86087	0.161783	0.0842085	0.0398551	0.02375	0.0649627	0.096171	0.0855457	-0.0718447	-0.0391566	0.0601336	0.0749888	0.203422	0.00347222	0.0541898	0.242919	0	0.12082	0.0942408	-0.0174216
185		0.0967226	0.00567234	0.0212766	0.220722	0.0880411	0.0663249	0.00341297	0.0853462	0.0439093	0.0872981	0.206714	0.0036523	0.082285	0.186207	0.128733	-0.00157978	0.0700315	0.0119298	0.0498084	-0.00411523	0.0455876	0.00205973	0.035	0.120482	-0.00871632	-0.0502901	0.0365854	-0.0469136	0.821012	0.12724	0.078134	-0.0235935	-0.0528999	0.0829694	0.0876736	0.227964	-0.160542	0.0466989	0.064877	0.071103	0.143128	0.0381544	0.0803547	0.139183	0.0619048	0.126207	0.195122	-0.0629371
186		0.0175976	-0.0366911	0.0398323	0.246369	-0.0184092	0.138393	0.027027	0.0253968	0.104433	0.105275	0.211037	0.011544	0.101904	0.102632	0.0925738	-0.0891204	0.0732648	0.0128023	-0.0820106	-0.0365854	0.0376959	0.0863158	0.0175	0.0687419	0.00496689	0.0459082	-0.0198223	-0.0199005	0.584721	0.0890585	0.0769231	-0.0314233	-0.0928617	0.0117647	0.113687	0.0647059	-0.00606061	0.00955414	0.0153173	0.0854317	0.138489	0.0800712	0.114558	0.0897672	-0.00458716	0.0851192	0.0541237	-0.10372
187		0.0466563	0.030085	0.0333988	0.19	0.0264993	0.138999	-0.00863558	0.0170543	0.0247001	0.0571043	0.128779	0.00364697	0.0794909	0.0567282	0.0918473	-0.0345357	0.12276	0.0397767	-0.00129032	-0.0300601	0.107023	-0.0704225	-0.086165	0.087159	0.0188679	0.0839232	0.0129693	-0.0195122	0.604457	0.139793	0.0216895	0.0813743	-0.0948999	-0.0280778	0.13028	-0.00874636	-0.0581162	0.059375	0.0933941	0.0931966	0.12218	0.042735	0.0470016	0.168839	0.00458716	0.0747445	0.110236	-0.190639
188		0.00705882	0.0493541	-0.0150754	0.246547	0.138607	0.141247	0.127928	0.00649351	0.038771	0.069485	0.207086	-0.0174165	0.0633905	0.0963061	0.0750257	-0.0078125	0.104287	0.07	-0.056701	-0.0247934	0.157216	0.108421	-0.113276	0.139154	0.0755034	0.0808679	0.048201	-0.128713	1.02351	0.169219	0.110127	0.0664137	-0.0647208	0.0275028	0.126823	0.179641	-0.176938	0.13302	0.0719258	0.0466786	0.153992	0.0346667	0.0382543	0.142945	-0.0754717	0.113541	0.122283	0.00353774
189		0.0389198	0.0290813	0.0151057	0.184257	0.119259	0.132784	0.00518135	0.0344828	0.0190058	0.0992573	0.273913	0.0412979	0.0492212	0.129844	0.0291667	-0.00936768	0.0540717	-0.0390903	-0.0364583	-0.0539419	0.140917	0.00731452	0.00893997	0.036888	0.0546358	0.0384995	-0.0150273	-0.00759494	0.755183	0.182487	0.0943396	0.1	-0.0907928	0.0352188	0.12624	-0.0570571	-0.0756972	-0.126984	0.139364	0.0657534	0.189704	0.0459874	0.0239651	0.178889	-0.0394432	0.0940345	0.0222222	0.0209102
190		0.0339384	0.0511691	-0.0193286	0.200618	0.110943	0.115541	-0.026362	0.077686	0.0464945	0.0880829	0.193587	-0.00145773	0.0704344	0.103774	-0.0877551	-0.0079713	0.120623	0.0844571	-0.0546379	-0.0167364	0.0773131	0.0357143	-0.0148148	0.0969529	0.109623	0.00589391	0.086771	0.045	0.844278	0.180445	0.0927597	-0.0333333	0.0842734	-0.0651014	0.110022	0.201183	-0.082495	-0.0363349	0.211268	0.0941337	0.207692	0.00178891	0.106336	0.186827	0.0246305	0.102628	0.0934066	-0.0166468
191		0.035686	-0.0158516	-0.0292634	0.192919	0.104859	0.163711	0.0550622	0.165017	0.101124	0.057461	0.188235	-0.0336574	0.0382745	0.13624	0.0702479	0.0350806	0.0736707	0.0143062	-0.0307692	-0.0187891	0.154666	0.105318	0.0540881	0.192806	-0.0151757	0.115189	-0.0131125	0.060686	0.842871	0.171591	0.0495805	0.0833333	0.0549305	-0.0141767	0.136842	0.039039	-0.0722892	-0.0756579	-0.0162413	0.0570902	0.136744	0.0606335	0.100299	0.150634	-0.370044	0.0938877	0.15978	-0.165308
192		0.0213777	0.00373768	0.0070922	0.21266	0.110297	0.128118	-0.0383275	0.0285714	0.0928302	0.0518123	0.0994012	-0.0577778	0.0335939	0.102373	0.0787234	-0.0783773	0.120482	0.117517	0.0409511	0.0444915	0.082373	0.0830705	0.0217949	0.138676	-0.0593979	0.105641	0.013222	0.0406091	0.970789	0.211391	0.0706133	-0.0206379	-0.0523526	0.0854606	0.10613	-0.091954	-0.116732	0.131886	0.11007	0.0693615	0.183286	0.03663	0.156573	0.150765	0.0145631	0.0925798	0.0758808	-0.0210526
193		-0.0645669	0.00748809	-0.0172589	0.249154	0.0781078	0.138832	-0.0017762	-0.00641026	0.083958	0.0493855	0.200244	0.000729395	0.0171284	0.121107	-0.0147679	-0.00730519	0.0117647	-0.0114286	-0.026738	-0.16805	0.0687919	0.0254842	-0.150754	0.0849762	-0.0157807	0.0588235	0.0372453	0.0952381	0.793035	0.169624	0.090371	0.0872727	-0.000637349	0.0372737	0.101595	-0.00275482	-0.0705882	0.0212072	-0.00454545	0.06838	0.158896	0.0335449	0.131409	0.15731	-0.0514019	0.0854044	0.0469613	-0.0278114
194		-0.0546318	0.0295015	-0.0614754	0.230281	0.0334962	0.11516	-0.0105634	0.0550918	0.095952	0.074796	0.249609	-0.027266	0.0127173	0.0978487	0.00215983	0.0256093	0.00524246	0.0331219	-0.143229	0.00636943	0.132124	0.0153218	0.0282776	0.110335	0.0598291	0.0946502	0.130624	0.0986667	1.05697	0.199233	0.0853052	-0.0581818	-0.0601307	0.0387597	0.0779043	0.12462	-0.00636943	0.0974026	0.148741	0.0869765	0.230151	0.0533088	0.116164	0.193671	-0.247573	0.127591	0.0629183	0.156138
195		-0.0485282	0.00507271	-0.00745474	0.19118	0.166475	0.12022	-0.027972	0.0566667	0.0984615	0.0566038	0.186813	0.0135338	0.0248714	0.110805	-0.00320171	0.0173124	0.00975927	0.0565476	-0.0807947	-0.132898	0.0383481	0.0806618	0.027451	0.119444	0.0162602	0.0387755	0.0655977	0.0129199	0.622754	0.217526	0.0718492	0	0.0138981	-0.0750816	0.0931284	0.0958084	-0.178645	-0.0385208	0.0945946	0.0974265	0.0843841	0.0243902	0.0950027	0.177429	0.111639	0.103001	0.119215	0.0229746
196		-0.0603379	0.0179966	0.0710498	0.234325	0.215348	0.0848861	0.118519	0.0424448	0.0722433	0.0423883	0.152248	-0.0428249	-0.0447761	0.105189	0.0493562	0.0491803	-0.0211361	0.0630096	-0.0438247	-0.14405	0.0872142	0.191011	-0.0542929	0.0950355	0.0370066	0.0707497	0.0575693	-0.102564	0.627	0.263074	0.107562	0.0331384	0.0411884	0.0968468	0.0656406	0.00609756	-0.0440252	0.0248756	0.0761905	0.0960037	0.154143	0.0423805	0.0563536	0.190873	-0.029703	0.0969537	0.0739726	0.0693431
197		0.018837	-0.0154162	0.042735	0.251802	0.115942	0.0938804	-0.0437956	0.0918367	-0.00826446	0.0916534	0.214464	0.002185	-0.0335773	0.160702	0.0344828	-0.0278008	0.0810449	0.0781955	0.0119048	-0.052521	0.140882	0.0891515	-0.0853199	0.0519573	0.0442177	0.026749	0.10122	0.0205128	1.10769	0.189581	0.131686	-0.0176125	0.0621622	0.0253025	0.100736	0.00609756	0.0405117	0.0294118	0.0158014	0.0789109	0.272195	0.0602637	0.0914535	0.109413	0.019802	0.13288	-0.0120805	-0.0301932
198		-0.0268949	0.00800557	-0.0206186	0.252967	0.127676	0.138773	0.0246479	0.05	0.11838	0.077063	0.176508	-0.0340136	0.0089383	0.0694158	0.0201058	-0.0224581	0.0490921	0.064759	-0.038822	-0.146939	0.103924	0.0160428	0.013089	0.107692	0.0214521	0.104101	0.0764832	0.0844687	0.907603	0.229195	0.123485	0.0696798	-0.0622951	0.00563698	0.0636569	0.0987654	0	0.00653595	0.113164	-0.0302475	0.16878	0.0354868	0.137574	0.205727	-0.039604	0.161522	0.120666	-0.124246
199		-0.0377834	0.0083682	0.0114226	0.243515	0.158207	0.0224796	0.108209	0.0274914	0.115709	0.0648988	0.141604	-0.0174375	0.046234	0.00556328	0.0170576	0.0220374	0.115932	-0.0304833	0.00543478	-0.104348	0.17581	0.0747562	-0.0253165	0.0947802	0.051495	0.104723	0.0994236	-0.0529101	0.646943	0.153512	0.13626	0.0700389	0.00067981	0.0237826	0.0914884	0.086262	-0.0344828	0.0991304	-0.0195122	0.0457038	0.188854	0.067907	0.0859654	0.190847	0.0697674	0.144825	0.0916905	-0.0361882
200		0.00498339	0.0604027	-0.0320579	0.267353	0.180201	0.148936	0.0420475	0.175221	0.0660661	0.0245343	0.0981728	-0.0791045	0.0104348	0.112813	0.0536278	0.0083682	0.0684385	0.0943396	-0.0146862	-0.169492	0.132898	0.061674	-0.162562	0.0924609	0.0856401	0.0665302	0.0750536	0.0478723	0.788403	0.172684	0.0992647	0.0998043	-0.0867824	-0.0344828	0.123788	0.0395137	-0.241803	0.0790378	0.0935252	0.0716597	0.149268	0.0151921	0.0665933	0.18676	-0.016092	0.158903	0.101648	-0.143201
201		0.00407498	0.0791519	0	0.270861	0.142966	0.145746	0.130112	0.0580205	0.107399	0.0602746	0.149611	-0.047619	0.0333767	0.118248	0.0435707	-0.0403587	0.0754967	0.00595238	-0.0455764	-0.0964912	0.119691	0.0780911	-0.025974	0.0991501	0.00586756	0.110876	0.0598414	0.163842	0.694812	0.0955313	0.0966565	0.0239411	-0.0469169	0.0607477	0.0697987	0.0953846	-0.128	-0.108911	0.0176991	0.0189027	0.051109	-0.0266904	0.0994444	0.142045	0.0118765	0.175407	0.0490463	-0.0251196
202		0.0125523	0.0372952	0.0319149	0.227477	0.14455	0.191747	-0.0755064	0.118881	0.0296412	0.048897	0.171053	-0.110942	-0.00821444	0.104845	0.0404372	0.0407315	0.0365854	0.0598032	-0.12234	-0.164114	0.152155	0.143488	0.0026455	0.148283	0.0244328	0.205913	0.112094	-0.0890052	0.995192	0.15756	0.0871166	-0.0687023	-0.0143149	0.0341686	0.0863343	0.152648	-0.097166	0.0357751	-0.0473934	0.0341328	0.174668	-0.00831025	0.124083	0.2239	-0.0117647	0.190892	0.0833333	-0.159562
203		-0.00578991	0.0669052	0.0394737	0.290635	0.214399	0.132446	-0.0371747	0.030303	0.152	0.060219	0.13107	-0.0775255	-0.0166056	0.210835	-0.0139037	0.0442035	0.0683819	0.0275229	-0.010929	0.0267857	0.095382	-0.00423729	-0.0189189	0.120172	0.0866142	0.102128	-0.00359454	0.0662983	0.68684	0.171555	0.0655738	0.0538922	-0.0231293	0.0592179	0.100977	0.121019	-0.0847458	0.057047	0.109453	0.0707635	0.215064	-0.0713012	0.155241	0.176884	0.076555	0.166327	0.00557103	0.106748
204		-0.0143218	-0.0238689	-0.0231533	0.254246	0.182559	0.112898	0.0546139	0.0716724	0.0833333	0.0960659	0.207572	-0.0633105	0.00677892	0.0919881	-0.0413574	0.00495868	0.0648829	0.114329	-0.0108401	-0.0181818	0.0637555	0.0139935	-0.0680359	0.137546	0.0206363	0.0662393	0.169582	-0.0310881	0.926587	0.189232	0.112411	0.0148699	-0.0342512	0.11345	0.0517086	0.0120482	-0.0857143	-0.0417362	0.0047619	-0.0869565	0.212183	0.0470914	0.0697804	0.173193	0.0827068	0.174796	0.120567	-0.0225
205		0.0404127	0.062635	0.0401737	0.18624	0.122918	0.0266393	-0.12381	0.00527241	0.0885093	0.0488747	0.14421	-0.0314658	0.020381	0.0827179	0.0125	-0.0903093	0.0423103	0.00601504	-0.0393487	-0.064877	0.0743802	0.231818	-0.0346598	0.100074	-0.0128096	0.0413943	0.122542	0.184971	0.870904	0.145484	0.088713	-0.0188679	-0.12678	0.0794393	0.120074	0.0178571	-0.0375	0.0151261	-0.0588235	0.0751773	0.240279	-0.0265811	0.106086	0.191376	0.0149254	0.156627	0.0477569	-0.0315152
206		-0.0195081	0.0742297	0.0353201	0.243024	0.215479	-0.0352861	-0.0850662	0.0484429	0.138662	0.0818327	0.157455	-0.025641	0.0265288	0.138439	0.0107066	0.0366269	0.104377	0.0938215	-0.0853994	-0.248352	0.130858	0.00426439	-0.133159	0.134021	0.158547	0.019979	0.063197	0.0798898	0.662745	0.123147	0.109296	0.123016	0.0142954	0.139508	0.137471	0.105882	-0.230143	0.0183028	0.0837438	0.047619	0.158746	0.00551471	0.12	0.186319	0.0995025	0.162514	0.156835	-0.0926829
207		0.030303	0.0997831	-0.0187431	0.213035	0.180617	0.115789	-0.029304	0.0517241	0.128165	0.0624269	0.198558	-0.0150913	-0.0126252	0.127112	0.0313514	-0.0179739	0.0822873	0.0725076	0.045392	-0.0790068	0.165633	-0.143757	0.0282638	0.0849963	0.0336984	-0.0134159	0.102622	-0.0817942	1.0835	0.0927835	0.101166	-0.0975143	-0.00408719	0.0722611	0.100465	0.152047	-0.116998	0.0365217	-0.198157	0.0362694	0.246673	-0.016791	0.126792	0.193803	0.040201	0.157254	0.116883	-0.0982587
208		0.15529	0.0923636	0.0418079	0.260929	0.102871	0.0205237	-0.0851064	0.00509338	0.024077	0.101134	0.128463	-0.0921875	0.0239427	0.145004	0.0831461	-0.0144312	0.000682594	0.0764572	-0.0321678	-0.107221	0.106383	0.0345572	-0.08	0.104258	0.0560828	0.0215054	0.0364312	-0.102703	1.06793	0.100763	0.139798	-0.0287908	-0.00687758	0.121212	0.0449387	0.0807453	-0.167728	-0.0699187	0.134615	0.0526316	0.0925373	0.0373066	0.108849	0.216629	-0.0212766	0.195906	0.100145	-0.0478589
209		-0.0193766	0.0478934	0.0955556	0.296578	0.0220197	0.0533758	-0.0242086	0.0671378	0.0725806	0.113567	0.201829	-0.0451011	0.0647709	0.125547	0.0981257	-0.052808	0.027137	0.0221543	-0.0807114	-0.0745614	0.155257	0.145497	-0.013459	0.140325	0.0857143	0.065678	0.110278	0.0730337	0.875637	0.126858	0.152593	0.0791075	0.0229326	0.119907	0.034642	-0.0275229	-0.122153	0.0228758	-0.0623557	0.0281354	0.114345	-0.0120706	0.0573106	0.196965	-0.00505051	0.144119	0.155072	0.0583127
210		0.00350263	0.10695	0.0989989	0.277201	0.120065	0.0695839	0.0254403	0.0987433	0.107451	0.090268	0.182733	-0.0454545	0.0454133	0.0218023	-0.0660888	0.0168209	0.118524	0.0610687	-0.0243205	-0.0507726	0.121907	-0.0407938	-0.0611979	0.102941	-0.0238305	0.0481283	0.0691729	-0.0304709	0.922528	0.0679767	0.17642	0.0139721	-0.0517598	-0.0127168	0.0458546	0.158879	-0.144068	0.0365217	0.0845771	0.102614	0.151776	0.0396226	0.108939	0.129642	-0.127451	0.154536	0.113069	-0.0369427
211		-0.00169492	0.0134399	0.0382022	0.205016	0.0906959	0.0923077	0.0711297	0.111913	0.0968775	0.0822016	0.120824	-0.0594679	0.0170633	0.108271	-0.0211864	-0.140234	0.0721358	0.0353303	-0.0661157	0.0363636	0.112619	0.115813	-0.095302	0.15478	-0.0200873	-0.0294118	0.133127	0	0.723849	0.0712401	0.128194	0.095723	-0.0139082	0.110577	0.039664	0.038806	-0.0614035	0.0748299	-0.0676329	0.050815	0.251384	0.0664172	0.0770982	0.139968	0.0295567	0.200695	0.210059	-0.0651341
212		0.0431034	-0.0110992	0.117241	0.267778	0.0851227	0.0604375	0.032	0.122302	0.119691	0.0546148	0.136335	0.0481541	0.0296496	0.0865672	0.0314193	-0.0486082	0.0236769	-0.0496988	0.0217707	-0.128736	0.119681	0.10158	-0.0819246	0.141345	0.093913	0.043573	0.0832049	-0.192308	0.726425	0.0713852	0.141753	0.0845361	0.0271399	0.0207852	0.0879017	0.142857	-0.0681818	0.0443686	-0.0148515	0.0834132	0.24302	0.047259	0.0453393	0.164107	0.0716049	0.194589	0.059854	-0.103145
213		0.0846287	0.0233711	0.104072	0.207835	0.126168	0.0324528	-0.0316206	0.0119658	0.0133543	0.0486694	0.178259	0.079646	0.0489731	0.118797	-0.00431034	0.0391909	0.0583275	-0.00681302	-0.0472103	-0.059081	0.144	0.175538	-0.196871	0.136187	0.0702656	0.0650759	-0.0625483	0.165217	0.628151	0.0750408	0.130713	0.0705394	-0.00984529	0.0741627	0.0590973	0.190031	-0.0982906	-0.0286678	0.0492611	0.0953327	0.236443	0.00832562	0.0748185	0.1875	-0.127451	0.180338	0.136966	-0.0506329
214		-0.00346021	0.0798699	0.0788013	0.266926	0.0601072	0.0336257	0.00601202	0.0335097	0.0662461	0.0305181	0.20287	0.0685805	0.0509554	0.156226	0.045204	0.0574514	0.0660981	-0.0413476	0.0126227	-0.0933941	0.17008	0.205387	-0.0807537	0.0673499	0.0211827	0.0208562	0.0030303	0.0568182	0.804975	0.100289	0.161963	-0.00578035	0.0358902	0.0655542	0.119266	0.0943396	-0.157895	0.037931	0.242268	0.0741463	0.103306	0.0211538	0.0679447	0.139013	0.123762	0.212621	0.0979827	-0.0899873
215		0.0486111	0.066764	0.0898749	0.238095	0.162075	0.0865849	-0.0378151	-0.00516351	-0.028481	0.0408407	0.167543	0.095429	0.00961098	0.147839	0.00650759	-0.00592217	0.066482	0.030256	-0.105997	-0.139269	0.165539	-0.00840336	0.0208333	0.040293	0.0509219	0.0377562	-0.00457317	0.0218579	0.786834	0.0716344	0.149934	0.0750507	0.0148831	0.00358423	0.0868321	0.0397351	-0.112108	0.0590219	0.044665	0.0115053	0.416279	0.0211538	0.0384181	0.186375	-0.259953	0.171071	0.0946746	-0.0559006
216		0.0253718	0.0639854	0.0800451	0.242999	0.0169622	0.0259644	-0.0930693	0.0125224	-0.0424339	0.0446768	0.240584	0.0347003	0.0104481	0.0940819	-0.0978261	0.0117137	0.0782736	-0.0284397	-0.0862801	-0.0688073	0.182448	0.272517	-0.0201072	0.0972644	0.0876882	0.0458515	0.0724409	0.0111111	0.898734	0.0488253	0.0926532	0.0501002	-0.0428571	-0.0199297	0.0691824	0.0415335	-0.00896861	0.143911	-0.028133	0.0750988	0.206417	0.0621915	0.0634286	0.156623	0.005	0.183295	0.170953	-0.0301129
217		0.0763889	0.111927	-0.109497	0.219281	0.029468	-0.0332103	-0.004158	-0.024735	0.125299	0.0823586	0.137177	-0.0619469	0.0400922	0.0560472	0.00111982	0.04424	0.0262009	-0.00852053	0.0448625	0.0238095	0.162575	0.170115	-0.0121786	0.0533537	0.0418483	-0.0189076	0.105058	0.101695	0.852237	0.114394	0.125541	-0.00982318	0.0259366	0.040293	0.130393	0.00645161	-0.0714286	0.0669014	0.0188679	0.0921705	0.279343	0.0169972	0.0766106	0.173466	-0.0309278	0.180784	0.0928144	-0.0906801
218		0.0293333	0.127206	0.162954	0.238282	0.0520548	0.113379	-0.0511247	0.0571429	0.00233827	0.0390588	0.186784	0.0520325	0.0998814	0.0979782	0.00224215	0.00222618	0.0336918	-0.0294352	-0.108571	-0.052381	0.116835	0.161593	-0.00817439	0.130233	0.010989	0.00880088	0.126183	-0.0662824	0.600827	0.118416	0.0736568	0.00803213	-0.0591589	0.0574163	0.101785	0.0219436	-0.0888383	0.0623886	0.110565	0.00440098	0.158006	-0.00286533	0.0956772	0.179283	-0.0460048	0.151025	0.139332	-0.0408685
219		-0.0132159	0.226004	0.123723	0.273604	-0.0799228	0.0582857	-0.0167364	0.136612	0.0895765	0.072784	0.0841795	0.0608273	0.0466466	0.04482	-0.0772627	-0.0109601	0.0394265	-0.0039093	-0.157001	0.0311751	0.197196	0.128997	-0.0136612	0.0972763	-0.00809353	0.0321865	0.0673001	0.0628571	0.870756	0.12037	0.130107	0.00206186	-0.137474	-0.0393325	0.14258	0.0909091	0.03125	0.0307414	0.150617	0.0323213	0.237895	0.0204082	0.0392888	0.214527	-0.0982368	0.169408	0.0713246	-0.0808344
220		0.0781528	0.118168	0.0884041	0.245734	0.130185	0.0109475	-0.0289256	0.0623886	0.0573043	0.0489941	0.170949	0.0930041	0.0651077	0.137079	0.0230011	0.0270861	0.0594203	-0.0016	-0.11522	0.0208333	0.134935	0.0707291	-0.0530612	0.0321839	-0.0490956	0.0979098	0.0215716	-0.138889	0.963077	0.137557	0.147972	0.173554	-0.200567	0.0252101	0.0766651	-0.0855263	-0.121212	0.0437828	0.0473815	0.0160194	0.24302	-0.00948767	0.0595411	0.169977	0.0964467	0.217169	0.21791	-0.0758534
221		0	0.108744	0.0742459	0.251349	0.219167	0.0225904	-0.0863158	0.0856102	0.0518519	0.0188147	0.13948	-0.0174326	0.0569518	0.108926	-0.00342075	0.0261438	0.124183	0.00718276	-0.0554765	-0.142202	0.151963	0.162413	-0.0607287	0.0878274	0.0384952	0.0111607	0.0577223	0.107246	0.745037	0.0904155	0.162605	0.0176125	-0.0785414	0.0949445	0.144543	-0.0914826	-0.0704846	-0.00684932	0.0100503	0.0976698	0.357724	0.0543689	-0.017321	0.200807	-0.055	0.192804	0.141194	-0.0729167
222		0.082637	0.138007	0.136891	0.222222	0.00543267	0.0925784	-0.00413223	0.0198915	0.0336	0.0694275	0.187908	0.0258549	0.0430578	0.122356	-0.0559824	-0.0190147	0.090379	-0.0159744	-0.138374	-0.0204082	0.154169	0.351479	0.0141243	0.11488	0.0955752	-0.0474649	0.023511	-0.00277008	0.787321	0.0614711	0.143357	-0.0357143	-0.0584046	0.176471	-0.0358829	0.0810811	-0.175705	-0.0153846	0.0663265	0.130864	0.134855	-0.00283286	0.0505814	0.204876	-0.131265	0.243362	0.147982	-0.00912647
223		0.0329475	0.0902935	0.0150289	0.251361	0.127419	0.00789771	0.0125	0.0626118	-0.0376176	0.0908644	0.249313	0.012285	0.0835098	0.133433	0.00110011	-0.0582862	0.0994916	0.00546448	-0.0350877	0.0118203	0.131725	0.249715	0.0274964	0.0752351	0.146067	0.0642002	0.105138	0.103448	0.695698	0.0950901	0.0732456	0.111562	-0.0815025	-0.00811124	0.123547	0.111111	-0.206897	0.0304114	-0.112676	0.10152	0.226216	0.0315186	0.0534619	0.212463	-0.251748	0.191156	0.200906	-0.101394
224		0.0174793	0.154762	0.0581395	0.24332	0.154472	0.0394238	-0.0974576	0.0201835	0.0211382	0.0547578	0.197817	-0.0445344	0.104064	0.117421	-0.0283126	-0.0181175	0.109353	-0.0227808	0.00440529	-0.0643564	0.132353	0.255319	-0.0290456	0.0252765	0.0829535	0.0552486	0.093572	-0.0222222	0.848975	0.0789364	0.135792	0.0705394	0.0694239	-0.0660487	0.0754902	0.240924	-0.0643016	0.106306	0.102902	-0.0282376	0.289474	0.0574929	0.0551135	0.228945	-0.196078	0.255511	0.222571	-0.0337838
225		0.0501367	0.161387	-0.00116414	0.262977	0.138799	0.0565015	-0.0502092	0.0621469	0.0904605	0.0845279	0.232094	-0.0268007	0.0952607	-0.00822737	0.0112108	-0.0411077	0.065407	-0.016129	-0.0463768	-0.1	0.150801	0.251781	0.00698324	0.0648944	0.0408163	-0.0243363	-0.0507416	-0.19346	0.942308	0.0590986	0.0872157	0.0373444	-0.0778016	-0.0116822	0.0251694	0.2	-0.105263	0.0912281	0.126984	0.0740029	0.107791	0.0473373	0.0708709	0.116971	-0.0150754	0.222653	0.163885	-0.0443864
226		0.0755064	0.192439	0.0586854	0.239289	0.109195	0.0754645	-0.021097	0.0273224	0.136402	0.0637341	0.21566	-0.0197694	0.0596491	0.0484713	0.036036	0.144804	0.0936107	-0.0677419	-0.0697674	0.0606796	0.094727	0.284382	-0.00143885	0.132016	0.090065	0.0768362	0.0867508	0.0416667	0.878335	0.0779055	0.0882353	-0.0219561	-0.016703	0.0787589	0.0881188	0.155556	-0.140909	-0.00854701	-0.0251256	0.115906	0.20356	0.00980392	0.0304094	0.161119	0.115282	0.256687	0.114504	-0.112821
227		0.0526316	0.12448	0.0655738	0.31476	0.142624	-0.00420972	-0.00610998	0.0382514	0.107289	0.0462144	0.213283	0.0234114	0.0707071	0.0786517	-0.0493963	-0.0717114	0.101859	0.0623974	-0.0297619	0.026764	0.15829	0.309048	-0.125884	0.102729	0.0461121	0.0155556	0.0541633	-0.0315186	1	0.0833153	0.10524	-0.0291667	-0.0950292	0.112485	0.0772297	0.0194805	-0.0765766	-0.00176367	0.0383632	0.083501	0.141316	0.0666667	0.0172062	0.18188	-0.0614251	0.215164	0.095679	-0.115584
228		0.0137489	0.0798598	-0.0277136	0.321503	0.0868465	0.0743349	-0.0280172	-0.00353357	0.0372168	0.064741	0.200274	0.0390041	0.0797947	0.0459941	-0.0443686	0.0392857	0.106928	0.0301548	0.0794118	-0.0494118	0.136278	0.259434	-0.134431	0.119632	0.117431	0.0087146	0.12253	-0.0465116	0.563169	0.0834409	0.106792	0.0639175	-0.0616184	-0.00838323	0.150179	-0.00958466	-0.114833	0.0896552	0.196891	0.0956435	0.242424	-0.00864553	0.100442	0.164775	-0.142169	0.255722	0.153966	-0.00395257
229		0.10987	0.110601	0.0327869	0.252326	0.106873	0.0764381	-0.0462185	0.0333333	0.0726351	0.0270803	0.209381	0.0449251	0.0311338	0.0222883	0.0990783	-0.0215633	0.0848708	0.0327869	-0.0755556	-0.117925	0.181163	0.400943	0.00981767	0.0681284	0.0502793	0.0801317	0.0552846	-0.0639535	0.849018	0.0698281	0.0954505	-0.0230608	-0.051149	0.0279465	0.0507139	0.0996785	-0.105618	0.0335097	0.112245	0.125437	0.243956	0.0870871	0.124105	0.152893	-0.0279898	0.197356	0.21118	0.0408163
230		0.0655271	0.0803089	-0.0487515	0.32494	0.0995968	-0.0231282	-0.0257511	0.168279	0.0525452	0.0554446	0.170897	0.00671141	0.0669506	0.0487062	0.00563698	0.0476611	0.0710059	0.0539629	0.0323529	-0.106383	0.105561	0.401496	-0.0937063	0.141463	0.0406504	0.094382	-0.0556863	-0.0605187	0.805236	0.0710984	0.0995786	0.172557	0	0.0146699	0.0979228	0.171429	-0.180556	0.0424028	0.139108	0.0878173	0.257593	0.0855992	0.0553765	0.198904	0.0862944	0.238192	0.0889236	-0.06469
231		0.0426885	0.128065	0.0333333	0.293446	0.0218239	0.0372695	-0.0863158	0.0313076	0.160578	-0.0076904	0.162651	-0.00339559	0.117816	0.130906	0.0808314	0.0718133	0.0565476	-0.103503	-0.00299401	-0.031401	0.12	0.40266	0.0655022	0.0174051	0.129151	0.0501672	0.066343	-0.2	0.741658	0.0659965	0.213343	0.0808511	0.00222058	-0.0376671	0.0922844	0.0790378	-0.157895	0.0357143	-0.043257	0.093591	0.258101	0.0644531	0.103306	0.125647	-0.0201005	0.220632	0.0428135	-0.0398936
232		0.0207156	0.0911233	-0.0577367	0.249925	-0.0300871	0.0879556	0.0651685	-0.00371747	0.0699242	0.0110276	0.206425	0.0502513	0.0626754	0.116822	0.00453515	0.0466786	0.108251	0.0794979	-0.0392749	-0.107914	0.0985782	0.375	-0.0287356	0.117131	0.047532	0.0055371	0.0883333	-0.0623145	0.92161	0.124234	0.138699	0.0193548	-0.164374	0.0566038	0.0150905	0	-0.0610329	-0.0306306	-0.015873	0.0886203	0.153931	0.13253	0.109204	0.209255	0.116279	0.156281	0.184713	-0.0866667
233		-0.0371714	0.126183	0.0712589	0.282849	0.0769844	0.0594766	-0.0956522	0.00367647	0.0530822	0.0281725	0.17911	0.0888697	0.0760123	0.140613	-0.0269006	-0.0718615	0.112805	-0.0429752	-0.0442748	-0.17734	0.146013	0.325444	-0.103641	0.126023	-0.0225836	0.0483871	0.0726073	-0.00591716	0.638298	0.102547	0.123556	-0.0451613	-0.108538	0.0162297	0.0739809	0.127148	-0.152778	-0.026362	0.241192	0.096505	0.213974	0.0829069	0.0513433	0.138861	0.00515464	0.16597	0.237942	-0.0747664
234		0.00362976	0.14534	0.0288462	0.237729	-0.0148654	0.100121	0.104677	0.0255474	0.102041	0.0282878	0.231038	-0.00762066	0.074994	0.127506	-0.00807382	0.0591304	0.0430267	-0.0831974	0.0122324	-0.0190476	0.0944844	0.412935	-0.0446686	0.0420712	0.0213953	0.0541761	0.0282392	-0.142857	0.666315	0.0786026	0.12225	0.0356394	-0.0324963	0.0257038	0.0521565	0.247312	-0.163551	0.0739437	0.0243902	0.113445	0.14316	0.00389864	0.101649	0.15661	-0.035	0.139004	0.1712	-0.0755735
235		-0.0179754	0.15969	-0.0203593	0.260584	0.0852273	0.103448	-0.12931	-0.0532319	0.103041	0.0565944	0.206908	0.0152801	0.130179	0.061974	0.019883	0.00757238	0.0829493	0.0397295	-0.0489297	-0.120603	0.117335	0.316425	-0.0307918	0.0907618	-0.0102996	-0.012318	0.0643847	-0.0414201	0.842324	0.201778	0.0544489	0.0105708	0.0378215	0.0160296	0.031968	0.201389	-0.125581	0.0693431	0.146739	0.0781169	0.247685	0.084264	0.10828	0.184908	-0.026178	0.137511	0.183144	-0.047749
236		0.00646353	0.113698	0.00486618	0.193757	0.128923	0.1024	-0.196687	0.0588235	0.0362869	-0.030015	0.188782	0.0341297	0.0888405	-0.0340651	-0.0103567	-0.0087184	0.132549	-0.0275081	-0.0104322	-0.171498	0.0951698	0.401937	-0.0600858	-0.0271108	0.0422535	0.0367075	0.0613893	-0.115727	0.764211	0.168923	0.133848	-0.0697674	-0.0225225	0.109415	0.0883864	0.158249	-0.109091	0.045208	-0.108753	0.113717	0.173034	0.0374753	0.017762	0.159401	-0.0314136	0.207117	0.193959	0.0364146
237		0.047081	0.0618918	-0.0197674	0.249626	0.126065	0.102804	-0.0234542	0.0114943	0	0.0682792	0.161709	0.0953631	0.121278	0.105221	-0.0300231	0.0459206	0.0637329	0.013468	0.0212766	-0.135802	0.13427	0.516291	-0.0256776	0.0118765	0.0846512	0.0551876	0.0906096	0.0239521	0.533191	0.148657	0.107762	0.0455531	0.0207214	0.095675	0.0404245	0.0641026	-0.187773	0.048474	0.0824742	0.154574	0.148842	0.0244399	0.0654545	0.14261	0.121053	0.1632	0.159278	0.0136986
238		-0.0393258	0.0959538	-0.0119904	0.258142	0.112158	0.087308	-0.0300429	0.100569	-0.0880399	0.06109	0.0572481	0.0392328	0.123987	0.0510367	-0.0313253	0.0467045	0.129502	-0.0353328	-0.113402	-0.106173	0.121182	0.267231	-0.0373961	0.0845528	0.122873	0.0191657	0.144988	-0.147826	0.80303	0.160295	0.0719186	0.0344828	-0.124528	0.081761	0.0460293	0.142857	-0.106095	0.00172117	0.0708661	0.0601542	0.222097	-0.01069	0.0504808	0.149126	-0.0615385	0.1709	0.0128617	-0.00409277
239		0.0340798	0.0914705	0.0429594	0.285238	0.109292	0.0559157	-0.004329	0.141243	0.0619621	-0.0168317	0.159184	0.00426257	0.0894191	0.0791367	-0.0167064	-0.0163139	0.169112	0	-0.0755287	-0.189573	0.105263	0.515451	-0.0191458	0.0695364	0.038674	-0.0295082	0.11895	0.00628931	0.765079	0.111062	0.0995812	-0.010661	0.0029985	0.0554156	0.0709147	0.204082	-0.178484	-0.00897666	0.0611111	-0.0188295	0.12	0.0944162	0.0635734	0.171843	0.104558	0.202875	0.203098	-0.0755735
240		0.0182167	0.0953678	-0.00945626	0.196031	0.152184	0.0485197	-0.012848	0.0658915	0.0475382	0.0323232	0.210379	0.0750647	0.132221	0.0427764	0.0405728	0.0333478	0.0356331	0.058319	0.0341615	-0.219451	0.160741	0.578815	-0.109353	0.0496689	0.00925926	0.153216	0.10066	0.0798722	0.703075	0.109686	0.121973	-0.0739958	-0.0369811	0.0987013	0.141059	0	-0.0719603	-0.0598291	0.10989	0.0512688	0.265074	0.011811	0.0812443	0.176532	-0.0539846	0.167004	0.190556	-0.0363881
241		0.0957031	0.0479208	-0.0377588	0.216339	0.114886	0.106173	-0.0443975	-0.0651769	-0.0354132	-0.0444501	0.195913	0.0592334	0.0979141	0.0715421	0.0492197	0.00177699	0.0863254	-0.0117845	0.0107198	-0.196078	0.115175	0.44389	-0.119013	0.0953947	0.0646673	-0.01	0.0506224	0	0.841584	0.0799823	0.0825112	0.069869	-0.0489408	0.074401	0.0802501	0.0714286	-0.0526316	0.0541516	-0.037234	0.107333	0.149888	0.0869565	0.0739491	0.146316	0.0625	0.185738	0.114428	-0.0677507
242		-0.0575816	0.0031348	0.0025	0.277138	0.190283	0.0207909	-0.047836	0.0150376	0.0579216	0.0339719	0.129643	0.0789474	0.0894507	0.0996732	0.0142518	0.017071	0.133436	0	-0.0678733	-0.0678392	0.138794	0.430348	-0.0413695	0.0219691	0.0196445	-0.00114286	0.036855	0.0031348	0.932914	0.0999548	0.104591	0.0683761	-0.0420811	0.124031	0.0504844	0.00990099	-0.227384	0	-0.0131926	0.00102354	0.286564	0.0526316	0.0556886	0.206822	0.077748	0.188591	0.124378	-0.0954301
243		0.0536585	0.0600962	-0.0426309	0.271548	0	0.0773616	0.0519481	0.0671785	0.0205832	0.0460509	0.136977	-0.0181504	0.0681873	0.1067	-0.0635294	-0.060511	0.0864198	0.0317052	-0.0153374	-0.0278481	0.138889	0.502591	0.0176991	0.0449251	0.125599	0.0351873	0.176772	-0.0838323	1.26151	0.0914388	0.0815145	-0.0723404	-0.110772	0.0745501	0.0770812	0.227586	-0.113689	0.111111	-0.0501319	0.0830249	0.250288	0.0546956	0.0279868	0.195225	-0.0725389	0.18998	0.170897	-0.0967302
244		-0.0785441	0.0700637	0.0841584	0.263859	0.155203	0.0953545	-0.0174672	0.0166976	0.0746781	0.0205761	0.222663	0.0905861	0.0968529	0.0657051	0.0511628	0.104352	-0.0664653	0.0324277	-0.0666667	-0.157767	0.105627	0.427527	-0.168524	0.0750206	0.0253046	0.0302352	0.0413907	0.0432099	0.905376	0.0851977	0.0837044	0.0332594	-0.0316114	0.101987	0.0922058	0.0943396	-0.211401	0.0539568	-0.0104712	0.0525762	0.171558	0.074	0.0765077	0.149767	0.0986667	0.162089	0.0132013	-0.0107239
245		0.0953307	0.054339	0.102343	0.22858	0.0955302	0.0987159	0.103448	-0.0114504	0.0274914	0.086225	0.200719	0.0238305	0.0647202	-0.0340031	-0.0776256	0.0735971	0.0709275	0.0197764	-0.108761	-0.187032	0.12322	0.516981	0.00895522	0.0514096	0.1387	-0.0242826	0.046589	-0.160221	1.16492	0.0667274	0.0827792	0.0126582	-0.0168196	0.0659898	0.0584383	-0.0851735	-0.208633	-0.0109091	0.175793	0.106127	0.169604	0.0216272	0.06088	0.202994	0.0964187	0.148264	0.203306	-0.0580297
246		0.0854369	0.0481155	0.0767327	0.299601	0.139947	0.0738037	-0.0511111	-0.0194553	0.0577089	0.0524683	0.180863	0.10171	0.0688557	0.133224	0.0165094	0.00675068	0.143987	-0.0506108	-0.0326594	-0.121212	0.106968	0.494898	-0.128058	0.0755483	0.118332	0.0283126	0.0895522	0.038961	0.691478	0.0756226	0.139741	-0.0045045	-0.0401235	0.114249	0.0561566	0.134426	-0.109005	0.195358	-0.055409	0.0799785	0.159817	0.0402542	0.0719033	0.140565	0.0388889	0.128559	0.282609	-0.150407
247		-0.00678952	0.0482815	0.092707	0.304293	0.149801	0.0905383	0.0132159	-0.248577	-0.0375427	0.0178197	0.202629	0.0408341	0.100968	0.0941476	-0.0156062	0.0587147	0.047397	0.0472855	-0.134644	-0.142857	0.156297	0.50828	-0.149059	0.0553691	0.164384	0.0923977	0.078203	-0.0434783	0.661814	0.0667278	0.0826595	0.0742358	0.00311526	0.103979	0.00922131	0.0446735	-0.207637	0.00927644	0.0640669	0.0729387	0.226572	0.0895833	0.0130264	0.167251	0.0806452	0.0900675	0.175468	-0.0991848
248		0.0322581	0.0444533	0.140645	0.327335	-0.0227555	0.0461413	-0.0196078	-0.0446602	0.0909091	0.0597484	0.231651	0.106762	0.0427055	0.0355666	-0.0441001	-0.0227894	0.0463878	-0.0680448	-0.0631741	-0.112782	0.080922	0.544271	-0.138728	0.0848896	0.150339	0.0011274	0.0230179	-0.0196078	0.967356	0.0133393	0.045781	0.0299145	-0.0705521	0.105058	0.0708743	0.0555556	-0.0386473	-0.0718232	-0.0157895	0.0684932	0.183815	0.0209205	0.0542056	0.198444	0.0652174	0.0812563	0.217544	-0.127175
249		-0.0300097	0	0.0648379	0.282819	-0.0733831	0.0333735	-0.0414747	-0.0393701	0.051349	0.0447523	0.228341	-0.0230496	0.0831018	0.108714	0.0831354	-0.0191111	0.115171	0.0297203	-0.145015	-0.0814815	0.0960961	0.552632	-0.0650888	0.155556	0.101156	0.0819672	0.072758	-0.0625	0.885264	0.138147	0.140741	0.137615	-0.0123648	0.0656371	0.0758836	0.03125	-0.219048	0.0223881	0.0778098	0.021097	0.197701	-0.0182556	0.0439116	0.189033	-0.12973	0.0406826	0.0996678	0.0152566
250		0.162462	-0.0131527	0.111389	0.253827	0.000423729	0.0127186	-0.0158014	0.00403226	-0.059315	0.110209	0.143582	-0.0094583	0.0280091	0.0910596	-0.0276775	-0.0645309	0.0589172	-0.0141844	-0.0096	-0.121827	0.110096	0.592053	0.0436747	0.0481928	0.095723	0.0293772	0.0958663	0.0607029	0.831672	0.155976	0.14312	0.0353982	-0.0989867	0.162127	0.120809	0.241379	-0.171569	-0.011194	0.118644	0.0700571	0.0799537	0.0260146	0.0230415	0.18805	0.0722222	0.108878	0.114094	-0.0855978
251		0.024975	0.0351759	0.037323	0.259189	0.0564344	0.0981194	0.0332594	-0.0808679	-0.0472915	0.0701802	0.161802	0.0758252	-0.0145436	0.0854701	-0.0250896	0.0407785	0.0426687	-0.0278527	-0.036566	-0.12782	0.101406	0.499368	-0.114706	0.0528053	-0.00288184	0.0791027	0.0938567	0.0725552	0.920467	0.150402	0.0162235	0.155056	-0.0303975	0.166445	0.0876102	0.281139	-0.0776942	-0.00743494	0.0991501	0.0341566	0.180023	-0.0591182	0.0787302	0.15502	0.0666667	0.162236	0.255245	-0.0876712
252		0.0392749	0.0542118	0.0453401	0.214646	0.181233	0.102316	-0.00458716	0.0772358	-0.00775194	0.078598	0.187271	0.0774775	-0.00430707	0.147485	-0.0859189	-0.0646492	0.0732087	0.0770626	-0.160237	-0.260759	0.144294	0.661417	-0.0398818	0.0558292	0.0645161	0.0374707	0.0713656	-0.18209	0.79085	0.125172	0.133318	-0.00456621	-0.0818898	0.174807	0.0239334	0.0676157	-0.144231	-0.0251451	-0.00821918	0.0588871	0.204651	-0.00206186	0.0201511	0.256608	0	0.106032	0.315603	-0.063745
253		0.0485629	0.0904564	-0.0555556	0.214552	0.163229	0.0388548	0.0318182	-0.0234375	0.0879121	0.0148857	0.162669	0.045045	0.00437355	0.0520134	-0.0344828	-0.00658514	0.122383	0.0305206	0.0405186	-0.0157895	0.0957932	0.55443	-0.0489297	0	0.0595358	-0.00934579	0.135135	-0.0280374	0.846506	0.103083	0.171628	-0.00668151	-0.109708	0.0997305	0.0290965	0.161512	-0.194103	0.00369004	0.182857	0.0545062	0.180328	0.0682303	0.0948858	0.203205	-0.00277008	0.111285	0.189744	-0.142668
254		0.0847804	-0.0533549	0.0843061	0.306492	0.159813	0.0840198	-0.0135747	0.0978044	0.0335449	0.0682687	0.189189	0.0181818	0.0824876	0.0233723	-0.0484262	-0.00784314	0.163842	-0.0575731	-0.0144462	-0.29902	0.146653	0.547804	-0.0556391	0.165794	0.181818	0.113772	0.063979	-0.128049	1.1942	0.158411	0.153917	0.0862471	-0.0366826	0.025641	0.0290758	-0.152542	-0.134328	0.0209524	0.042735	0.0637849	0.193317	0.0708995	0.0966699	0.196621	0.0584958	0.124142	0.226714	-0.150917
255		0.032	0.100381	0.0649682	0.309622	0.167667	-0.0175869	-0.0580357	0.0930693	0.149321	0.00593312	0.183449	0.00621118	-0.0127097	0.108108	-0.0122549	-0.0480816	-0.00691776	0.0352304	0	-0.103896	0.0525263	0.600519	-0.0739645	0.101498	0.151822	0.0604651	-0.0320346	-0.0914634	0.836139	0.143525	0.15268	0.131034	-0.149618	-0.0230769	0.0761955	0.071161	-0.0327456	0.0342205	-0.00561798	0.126623	0.20283	0.0680412	0.0315657	0.214203	0.0165746	0.138967	0.198642	-0.107438
256		0.0579858	0.0246599	0.0491368	0.263327	0.110797	0.0990686	0.0988506	0.0100604	0.0421245	0.0243629	0.164374	-0.003663	0.0649417	0.106346	0.0640394	0.0435203	0.116653	-0.0321396	0.0339257	-0.136	0.122934	0.681159	-0.0866873	0.103863	0.169634	-0.00119474	0.09797	-0.00636943	0.854875	0.141143	0.0706559	-0.0409091	-0.0015625	0.194737	0.0208891	0.254613	-0.0677083	-0.0247619	0.0838323	0.0567875	0.165687	0.0488323	0.107154	0.167014	-0.0425532	0.0777675	0.255172	0.0458971
257		-0.0555556	0.0495903	0.0165184	0.232772	0.0387097	0.0524979	-0.136364	0.0313725	0.0622711	0.0539945	0.165573	0.0327273	0.00154083	0.0995745	-0.0363196	-0.0305344	-0.016	-0.00183486	-0.00473934	-0.292308	0.0918264	0.6781	-0.0477658	0.0573356	0.128257	0.11716	0.0946429	-0.125786	0.85	0.0191083	0.14105	0.0340136	0.00949367	0.177835	0.0132066	0.0490566	0.00505051	0.0363289	0.163934	0.0849813	0.2661	-0.00206612	0.0383632	0.186838	0.0441989	0.0911901	0.210963	0.0431154
258		0.0816733	0.0185497	0.104167	0.248154	-0.0771197	0.0347717	-0.0273973	0.0361446	-0.0246046	0.00296896	0.207101	0.0333033	0.0344476	0.0134003	-0.0553506	0.085086	0.0782609	-0.0347349	0.073955	0.0354223	0.092668	0.640362	0.0366972	0.0921386	0.0967742	0.0408654	-0.0213129	0.169435	0.741071	0.101039	0.0902394	0.0938215	-0.0496894	0.07393	0.0500532	0.115242	-0.0948905	0.0265152	-0.0284091	0.0697168	0.218824	0.0211864	0.0481386	0.229927	0.0324324	0.107008	0.294118	-0.108071
259		-0.0661241	0.0598958	0.0716981	0.175487	0.0638391	0.0760636	-0.169811	0.0597938	0.0172884	-0.0326902	0.131298	0.0618182	0.0306279	0.0303541	0.00737101	0.0201246	0.110931	0.00729927	-0.0340357	-0.0680628	0.0775428	0.760638	-0.0319149	0.0148515	0.124632	0.126202	0.00272975	0.042623	0.875142	0.143406	0.0968185	-0.0022779	-0.0337255	0.149333	0.0731447	0.0571429	-0.0597015	-0.0912548	0.135593	0.053951	0.0606796	0.0481283	0.0630864	0.187732	0.0196078	0.0974487	0.28169	-0.106613
260		0.0285132	0.0692308	-0.030888	0.272215	-0.0263499	0.0582235	0.0239234	0.0580913	0.0319052	0.0121681	0.207357	0.0318471	0.0253911	-0.014419	0.105392	0.0351468	0.0889968	0.0583874	0.0748752	-0.132275	0.138211	0.634667	-0.021309	0.0791993	0.0566038	0.150303	0.0989824	-0.232198	0.671202	0.100165	0.060947	0.0373832	-0.0325139	0.0812903	0.0499737	0.102662	-0.161616	0.0267176	0.031339	0.146476	0.183486	0.04814	-0.0218883	0.195668	0.128655	0.167928	0.304659	0.0176471
261		-0.0584677	0.0343053	-0.0526316	0.241164	0.121907	0.0418803	0.0651163	0.0221328	0.0539568	0.0122917	0.251954	0.00753296	0.0419131	-0.0153322	0.00876095	0.0097229	0.159444	-0.00902527	-0.0146819	-0.008	0.112828	0.653795	-0.144158	0.105862	-0.100768	0.0645554	0.0373002	-0.0709677	0.937634	0.106657	0.123531	-0.0625	-0.0228526	0.0873016	0.0634249	-0.00735294	-0.056701	-0.0791897	0.154762	0.133333	0.177885	0.0630435	-0.0195059	0.23871	0.0647887	0.147869	0.393617	-0.20467
262		0.0423117	0.00380228	-0.101604	0.164746	0.0464801	0.0761863	-0.13615	0.0184049	0.0237226	-0.04682	0.18597	0.119181	0.0613208	0.054576	-0.0382775	0.103088	0.0939318	0.0482498	-0.0292208	-0.112299	0.12	0.579652	-0.07739	0.093913	-0.0102249	0.0780142	-0.0236887	0.0358306	0.83047	0.0726151	0.0507081	0.00705882	0.0549273	0.150273	0.0842217	0.128788	-0.00253165	0.0775348	0.0724638	0.11	0.114286	0.0919037	0.0439883	0.168404	0.123209	0.186638	0.339286	-0.0805556
263		0.0317949	0.0414707	0.0619946	0.161706	0.0580236	0.00253165	0.0140845	0.0950413	0.0485075	0.0177741	0.251484	0.012093	0.067283	0.071066	0.0126582	0.0453437	0.0480848	-0.0596745	0.0326797	-0.211957	0.0964681	0.716216	-0.0443787	0.0909091	0.125911	0.0115473	0.0881017	0.0375427	0.946726	0.0980014	0.0728006	0.155131	-0.00158228	0.0695876	0.0483117	0.0549451	0.033419	0.0650888	0.112392	0.037037	0.188475	0.0617551	-0.0246593	0.0469932	0.182073	0.190654	0.407534	-0.163889
264		0.0224033	-0.0229397	0.012987	0.206389	0.105799	0.129825	-0.034642	-0.0208333	0.019039	0.017033	0.205914	0.0270775	0.045083	-0.00337268	0.0738423	0.0438169	0.133054	0.0108696	-0.0448505	-0.0614525	0.092987	0.596257	-0.0669711	0.0896185	0.116402	0.0729295	0.0769231	-0.10828	0.656885	0.151487	0.0545712	0.0700935	0.0633914	0.174387	0.114861	0.322709	-0.06	0.0820312	0.0145773	0.142533	0.161604	0.00447427	0.0355263	0.222859	0.110465	0.179455	0.289116	-0.12091
265		0.0310559	0.0138018	-0.0329381	0.221515	0.190702	0.113695	-0.0119904	0.161426	0.102041	-0.027543	0.182226	-0.0371747	0.0712989	0.0171527	-0.0229592	-0.0751807	0.152882	0.0185874	-0.03367	-0.165312	0.0497925	0.785814	-0.0149701	-0.00339559	0.127234	0.0167464	0.0970018	-0.0342466	0.766968	0.130821	0.138357	0.025641	0.0912	0.251029	0.0765027	0.0109091	-0.00755668	-0.0479705	-0.213115	0.0614085	0.207026	-0.00863931	0.0360039	0.205015	0.208092	0.195574	0.248677	-0.174863
266		0.00719424	0.076044	-0.0927573	0.101647	-0.00488672	0.0783133	0.0415648	0.0186335	-0.0647482	-0.0867114	0.168142	0.014733	0.0375427	0.0179028	-0.0508055	0.0213592	0.0480065	0.0508475	-0.042623	-0.0871795	0.112272	0.749326	-0.126154	0.0733864	0.164398	0.027611	-0.0140845	-0.0958084	0.704881	0.0854823	0.1077	-0.114219	-0.0939227	0.165545	0.0468085	0.154122	-0.0935961	-0.0864662	0.138028	0.0578231	0.159036	0.00747065	0.0167668	0.206484	0.0532213	0.188658	0.366782	-0.135664
267		0.030623	0.0628019	0.00655308	0.0981707	0.148799	0.103598	0.145038	0.0413223	0.043318	-0.00222346	0.182628	0.0281426	0.0270961	0.126231	-0.0253165	0.0621814	0.0158996	-0.013876	-0.00664452	-0.0418848	0.104633	0.639785	-0.0419907	0.045614	0.111111	-0.0388235	0.0675182	0.0744337	0.568106	0.107262	0.0934172	-0.0296128	0.0700326	0.106771	0.0856531	0.258427	0.0152284	-0.0264151	0.0712251	0.126712	0.108959	0.0928962	0.0315242	0.251799	0.0265957	0.223103	0.44	-0.0469417
268		0.0310559	0.0237171	-0.0294494	0.157289	0.163981	0.0152505	-0.114558	-0.0711297	0.0855513	-0.000558036	0.190138	0.0447193	0.0641725	0.0584133	-0.0625	0.0377907	0.0759076	0.0556586	-0.114478	-0.0534759	0.0268595	0.710106	-0.0401235	0.0722892	0.0102669	0.0987952	0.0175439	0.00653595	0.805621	0.104236	0.110092	-0.0875576	0.0481633	0.0704961	0.0897155	0.152941	-0.0761421	-0.00571429	0.125786	0.0563698	-0.0786773	0.0196078	-0.0328455	0.18661	0.127778	0.196145	0.354409	0.0168067
269		0.00320856	0.0793512	-0.0883117	0.0815691	0.0898092	0.0743511	0.134328	0.126338	0.0809793	0.00751043	0.240741	0.0288462	0.0572337	0.0343008	-0.0888031	-0.0211302	0.0370981	-0.0909091	-0.0436242	-0.105691	0.109802	0.704698	0.0556439	0.0845948	0.0962343	0.0588235	0.00189394	-0.00632911	0.94363	0.1027	0.0371075	0.0688836	-0.0799683	0.213986	0.0369565	0.046595	-0.042394	0.0271318	0.125382	0.115801	0.17717	0.0267857	0.0569315	0.203854	-0.0223464	0.219054	0.382979	-0.0320781
270		0	0.0480349	-0.0848806	0.168387	0.103949	0.0332889	-0.0310263	0.0468085	-0.0163619	-0.0291424	0.0792952	-0.061657	0.0557125	0.118919	-0.0222805	0.073653	0.0381679	-0.0113208	-0.128039	-0.0923913	0.133616	0.830028	-0.0472441	0.044405	-0.0408367	0.0143885	0.073724	-0.0413793	0.790081	0.185474	0.132356	0.0585366	0.0737913	0.201087	-0.0213904	-0.146853	0.0437018	0.0576541	-0.0186335	0.0493119	0.170441	0.0655022	0.0331844	0.224601	0.120219	0.221773	0.390845	-0.0589971
271		0.0646552	-0.0183406	-0.0322581	0.0890777	0.122556	0.0679012	-0.0673077	0.130435	-0.0966011	-0.0117845	0.142109	-0.0482625	0.0453125	0.0533808	0.0329114	0.0651068	0.118846	0.00867888	-0.0554622	-0.124324	0.167026	0.986283	-0.0714286	0.0607639	0.103018	0.02457	-0.0278527	-0.0927152	0.680185	0.187661	0.0323348	0.0232558	0.0762852	0.182825	0.0912997	0.183824	-0.0784314	0.031746	-0.033033	0.136074	0.133256	0.0270856	-0.00444162	0.154475	0.0224719	0.224324	0.300699	-0.0771429
272		0.0622318	-0.0157618	-0.111111	0.148112	0.124708	0.1051	-0.0168675	0.154013	0.0997096	0.0287001	0.152643	0.000947867	0.0866463	0.025729	-0.0609137	-0.0235825	0.066778	0.0420954	0	-0.0773481	0.138725	0.796089	0.0552923	0.0351328	0.130159	0.10362	0.0384255	0.0702341	0.703872	0.133599	0.128034	0.169154	0.0422078	0.106613	0.0787746	0.289796	-0.0545455	0.0412574	0.105263	0.105747	0.110571	-0.00218818	-0.0108696	0.153174	0.0366492	0.154354	0.363014	-0.0581395
273		0.0967056	0.0775401	0.00660502	0.15402	0.125749	-0.0279232	-0.198068	-0.0858369	0.0448902	-0.00701262	0.179449	-0.0369004	0.0850622	0.112489	-0.0282776	-0.00955254	-0.00246103	0.0233863	-0.0764228	-0.0837696	0.119483	0.972222	-0.0219092	0.0288462	0.157663	0.0807453	0.0156107	0.0133333	0.691415	0.118864	0.0676945	0.107843	0.0936455	0.242047	0.0549451	0.0970149	0.0393701	-0.0518519	0.0650888	0.135484	0.142512	0.0633188	0.0422259	0.203682	0.158177	0.224326	0.370826	-0.0770308
274		-0.00634249	0.0858427	0.0333778	0.154659	0.118036	0.045977	0.0788177	-0.00217865	0.0782281	0.0155587	0.0890284	-0.0268199	0.0791925	0.0115146	-0.00394218	0.0173182	0.0912106	0.0728863	0.0287648	-0.0962567	0.106109	0.744799	-0.00315457	0.0847458	0.10432	0.00244499	-0.182482	-0.0268456	0.795724	0.0862697	0.0835899	0.0604651	-0.104928	0.0654206	0.124161	0.25523	0.056	0.093985	0.080597	0.123095	0.124246	0.0143014	0.060225	0.176196	0.105691	0.245176	0.282759	-0.0542857
275		0.0283316	0.09482	-0.0698925	0.12334	0.145531	0.0849732	-0.0931373	0.0107991	0.0998117	0.0211308	0.244094	0.0485437	0.147429	0.0372389	-0.0512821	0.0611222	0.057047	-0.0421743	-0.0740103	-0.148352	0.109434	1.05085	0.0482315	0.0713656	0.339956	-0.00616523	0.0367647	-0.0295082	0.926267	0.140447	0.135885	0.0582524	-0.109285	0.0414993	0.126949	-0.112782	-0.179894	-0.0179641	0.0996979	0.110853	0.193196	-0.0397351	-0.0163724	0.182979	0.270655	0.247599	0.283082	-0.09299
276		0.022412	0.0194306	0.00282486	0.081692	0.147664	0.121884	-0.170616	0.0438596	0.0910853	0.0432776	0.229008	-0.0107738	0.0457277	0.0931099	0.0209424	0.065641	0.0769231	-0.146592	-0.0259965	-0.0352304	0.0748373	0.950069	-0.0570988	0.0581916	0.183258	0.0934343	-0.0220183	0.0576271	0.668998	0.141633	0.118768	0.200993	-0.108943	0.108992	0.12312	0.152941	-0.173127	-0.0506567	0.0843373	0.0456621	0.0517241	0.0666667	0.0525633	0.152968	0.179191	0.255783	0.226027	0.0962963
277		0.0565217	0.036635	0.0644258	0.150863	0.045392	0.0686953	-0.0854271	0.0865801	0.00287632	0.0521163	0.164431	0.000981354	0.127671	0.0136737	-0.0245796	-0.0162272	0.0892099	0.12426	-0.035461	-0.310924	0.10967	1.03301	-0.0717629	0.0933573	0.0568421	0.0335404	-0.064186	0.070922	0.997573	0.195963	0.0784077	0.114355	0.0778342	0.158192	0.0722222	0.264463	-0.210667	-0.00809717	0.177215	0.0494474	0.157635	0.0980834	0.0349103	0.202152	0.122616	0.22391	0.154639	-0.156835
278		0.0819672	0.0838941	-0.00934579	0.0205523	-0.0729766	0.101928	0.0483461	0.00840336	0.117534	-0.0141884	0.211516	-0.0473485	0.123126	0.0344203	-0.242079	0.145153	0.0886957	-0.0426165	-0.0133779	-0.100817	0.0747409	1.07921	0.00163934	0.0953237	0.216187	0.0390244	0.00374532	0.133106	1.00704	0.123819	0.0175012	0.103926	0.0723297	0.107776	0.0731171	0.0307692	-0.188329	0.0189394	0.0493827	0.086116	0.1491	0.0874439	0.017702	0.172915	0.202186	0.204672	0.148649	0.0690162
279		0.0886918	0.0166742	-0.071525	0.09376	0.157689	0.0738318	0.04	-0.0315315	0.175781	0.0162037	0.2464	0.0201342	0.0876149	-0.0167106	-0.11817	0.0478128	0.0532544	-0.0971154	0.0143885	-0.183562	0.157377	0.991597	0.0352564	0.0240137	0.114607	0.0560976	-0.132042	0.160839	0.854671	0.142001	0.146084	0.137056	-0.0346535	0.254731	0.0928531	0.321739	-0.031746	-0.0509804	-0.0125786	0.149708	0.0845411	0.0483516	0.00355182	0.207867	0.190476	0.208544	0.360714	-0.132548
280		0.0979548	0.0756901	0.0588235	0.0985094	0.0213556	0.0726359	0.0421053	0	0.138728	0.00801374	0.204669	-0.0549242	0.117879	0.126735	-0.0935065	0.0801008	0.0966057	-0.0181818	-0.141379	-0.0410959	0.101099	1.00276	-0.0497592	0.0991957	0.19469	0.145386	-0.0921409	0.0410959	0.714286	0.0617409	0.141571	-0.00705882	-0.0283333	0.223164	0.0390033	0.227642	0.0520548	-0.027451	-0.0584795	0.0999402	0.0668348	0.136312	0.0124672	0.15687	0.17847	0.269406	0.369176	-0.188513
281		0.0881393	0.0928962	0.0135135	0.0615533	0.150511	0.00359389	-0.0640394	0.137615	0.12249	-0.0112423	0.233227	-0.0049456	0.0962963	0.0827206	-0.00672948	-0.0581633	0.0966057	-0.018078	-0.108108	-0.172603	0.119378	1	-0.0553746	0.0727432	0.108108	0.0585366	-0.144902	-0.0268456	0.830233	0.108192	0.141144	0.139303	-0.0326264	0.2149	0.101061	0.0472441	-0.18481	0.135802	0.121019	0.0411118	0.170792	0.148023	0.0438482	0.181145	0.0997305	0.185283	0.165017	0.0681115
282		0.00657895	0.0983456	0.0278552	0.0841306	-0.0243566	-0.0254083	-0.145985	-0.0615711	0.0991168	-0.00775639	0.195552	0.000977517	0.0780399	0.0409683	-0.0403121	0.164226	0.0921986	0.0674603	-0.0827586	-0.115282	0.0841121	0.836158	-0.104575	0.0940767	0.08125	0.0257669	0.134241	-0.0666667	0.770379	0.126389	0.13146	0.0821256	0.0147186	0.199426	0.0895857	0.0956522	-0.0890585	-0.00787402	0.121951	0.0900474	0.190062	0.036626	0.00883219	0.211665	-0.00826446	0.232162	0.428571	-0.0822123
283		0.0583058	0.105263	0.0153417	0.13939	0.166585	0.0570627	-0.00485437	-0.0311111	0.0267592	0.0209668	0.175097	-0.0430528	0.0565229	0.0478821	-0.0133333	-0.0474948	0.124011	-0.1322	0.0442478	-0.0344828	0.117355	1.05739	-0.0178571	0.0435556	0.146369	-0.0157195	-0.137769	-0.0666667	0.788636	0.117722	0.111275	0.0381679	0.0765391	0.171146	0.0538244	0.072	0.0319149	0.0470588	0.158879	0.0621791	0.240764	-0.0677026	0.0052597	0.22288	0.0139276	0.237422	0.357664	0.0996885
284		0.0349345	0.0707804	0.0485714	0.142667	-0.00229885	0.0113101	-0.00254453	-0.00446429	0.0626223	-0.0195964	0.123364	0.0734574	0.03219	0.00359712	0.056	0.177708	0.0961538	0.0141988	-0.0361446	-0.0786517	0.152809	0.890961	0.0204403	0.0869565	0.230392	0.0185414	0.0484623	-0.024911	0.868852	0.0958269	0.074001	0.129771	0.0111016	0.177931	0.0402068	0.130081	-0.0135501	0.0285714	0.161512	0.0760234	0.092707	0.05	-0.00262295	0.212684	0.267606	0.203109	0.389397	-0.0523952
285		0.0445434	0.165021	0.00276243	0.0846787	0.14414	0.0993377	0.0134048	-0.0178571	0.156313	-0.00375831	0.102894	0.115768	0.10532	0.0938389	-0.0817942	-0.0318979	0.127042	-0.0434363	0.0245614	0.0179641	0.0904018	1.16147	-0.0582524	0.11575	0.10793	-0.00241255	0.016791	0.0103806	0.724621	0.119568	0.0737361	0.0271605	0.10327	0.249643	0.0728402	0.170732	0.110497	-0.0823529	0.116719	0.0977621	0.0365854	0.0124294	-0.00896117	0.122711	0.105556	0.211519	0.325926	-0.0803571
286		0.0176991	0.104895	0.0568655	0.163516	0.219235	0.0721063	0.0388601	-0.0313901	0.114173	0.0430108	0.147287	-0.00592885	0.0106687	0.0813309	-0.0901857	0.0886144	0.0464286	0.03125	-0.0566372	-0.109244	0.116305	1.17366	-0.129721	0.151163	0.15145	-0.0304507	0.170535	-0.103448	0.71831	0.140274	0.0310621	0.02	-0.118476	0.185393	0.0878378	0.178862	-0.0588235	0.0287908	0.0473186	0.0480094	0.158428	0.0488889	0.0395218	0.187525	0.140401	0.234652	0.442202	-0.02526
287		0.0953984	0.0340386	0.034384	0.118802	0.169634	0.105189	-0.0734177	0.0280374	0.034965	0.0386343	0.126307	-0.03	0.0792372	0.0649351	0.0567568	0.0498145	0.188899	0.00292683	-0.0518135	-0.180055	0.109031	1.19062	-0.102178	0.0694184	0.18232	0.105198	0.15533	0.0397351	0.811821	0.0596671	0.0897276	0.0492611	0.051458	0.267045	0.0628155	0.133603	-0.0327869	-0.00952381	-0.0578778	0.0795181	0.0922693	0.106729	0.0288336	0.196806	0.0924855	0.20849	0.416031	-0.0315789
288		-0.0157658	0.120941	0.0382979	0.0608868	0.0983773	0.0394737	-0.0623441	0.0699774	0.12537	0.0411765	0.186715	0.0531595	0.0623145	0.0289991	0.0145695	0.0879828	0.0866845	-0.0553936	-0.0769231	-0.211111	0.128351	1.13569	-0.0455285	0.113173	0.111835	0.146871	0.0176817	-0.192857	0.861985	0.100178	0.0645802	0.107692	0.159191	0.149296	0.0973551	0.198347	-0.151351	0.0340909	0.171975	0.112701	0.167959	0.0492554	-0.00432612	0.248968	0.312139	0.190402	0.402214	-0.122239
289		-0.111602	0.0521862	0.0301291	0.0906117	0.117617	0.0607365	-0.0816327	-0.23871	0.0623782	0.00408879	0.212418	0.0421687	0.0834715	0.0814815	-0.0551817	0.0491803	0.0568679	-0.016129	-0.0927487	-0.082153	0.057127	1.23167	-0.175123	0	0.190899	0.0188206	0.0503455	-0.047619	0.92966	0.116352	0.092331	0.0552764	0.0355932	0.0894085	0.100748	0.0209205	-0.119363	-0.162264	-0.04	0.106434	0.0857875	0.088993	-0.000336134	0.212774	0.179191	0.222564	0.456647	-0.116923
290		0.0351873	0.0398517	0.0635155	0.088649	0.12293	0.0501171	0.0242588	-0.0800915	0.0963257	0.0340299	0.178729	0.00308325	0.0127707	-0.00468604	0.0240642	0.134667	0.0761246	0.0317298	0.0053286	0.0591716	0.116695	1.14697	-0.0382696	0.0376648	0.148515	0.0786802	0.111554	-0.276451	0.834348	0.0270677	0.144972	0.0701299	0.0327724	0.229412	0.139151	-0.057377	-0.127778	-0.00392157	0.111801	0.105546	0.183374	0.0778032	0.0377044	0.210227	0.240223	0.198421	0.350943	-0.1
291		-0.00225734	0.0832545	-0.0504775	0.0509366	0.16002	0.111426	0.0548303	0.105386	0.0788127	0.0123086	0.165438	0.0214067	0.0519659	0.101476	-0.0572917	-0.00373732	-0.0165361	-0.049545	0.00518135	-0.0643275	0.0686436	1.06149	-0.177994	-0.00662252	0.159598	0.214008	0.0781563	-0.114286	0.943765	0.128912	0.0125376	0.174603	0.116487	0.117397	0.0777262	0.0857143	0.00268097	0.0909091	-0.0215385	0.0518166	0.175711	0.0416198	-0.000338868	0.216641	0.172414	0.170437	0.380597	-0.164671
292		0.058296	0.0209663	0.107604	0.0486381	0.181208	0.0749766	-0.11054	0.0162413	0.0726916	0.0627262	0.191928	0.0180723	-0.0493421	0.105314	-0.00793651	0.0439852	-0.0131926	-0.0234834	0.019469	-0.0847458	0.117381	0.929412	-0.0181219	0.0810811	0.0961969	0.164295	-0.003003	-0.428571	0.718482	0.112857	0.145098	0.107143	0.112889	0.106322	0.029093	0.164062	0.0651558	0.144531	0.147239	0.0587544	0.201024	0.0212264	-0.0104412	0.212194	0.13467	0.153214	0.402597	0.0110236
293		-0.00794552	0.0749186	0.0810811	0.0508143	0.153806	0.0950355	-0.0566038	0.0952381	0.220232	0.0546758	0.143082	0.095723	0.0317862	0.0882638	-0.0421053	0.0463576	0.0106195	0.039196	-0.0212766	-0.142424	0.0964706	1.21483	-0.0952381	0.0633609	0.164937	0.109694	0.11272	-0.0289855	0.756458	0.140487	0.108993	0.161125	0.0463458	0.120588	0.0736479	0.181435	-0.130194	-0.0846154	0.0457516	0.0880579	0.326174	0.125592	0.0620549	0.298104	0.306358	0.1426	0.256506	-0.0866873
294		0.00455581	0.00908265	0.0351906	0.0849243	0.174652	0.0316302	0.0749354	-0.046729	0.0699088	0.0566728	0.155447	-0.0121951	0.000562114	0.0461828	-0.0179806	0.20174	-0.0070922	-0.0109671	-0.0145455	0.0290698	0.104155	1.22866	-0.0971993	-0.0366886	0.225446	0.119384	-0.00601202	-0.12766	0.861818	0.134733	0.110826	0.0928382	0.0253718	0.137085	0.0184332	0.216667	-0.11413	0.0139165	0.0285714	0.100367	0.197279	0.0406321	0.100592	0.182147	0.0309859	0.140836	0.310219	-0.0276923
295		-0.0623608	0.0630798	0.109145	0.065816	-0.110691	0.0229226	-0.0531646	0.109524	0.163265	-0.0338222	0.26503	0.00204082	0.0189838	0.108549	0.0921228	0.136114	0.021978	0.0741117	-0.0729167	-0.0414201	0.120407	1.0506	-0.117355	0.10788	0.189696	0.0934699	0.00315457	-0.0671378	0.894231	0.112661	0.10718	0.122807	0.0574506	0.151954	0.052879	-0.080292	-0.0555556	-0.0846154	0.140984	0.0752816	0.134591	0.0159817	0.114424	0.153723	0.133144	0.111278	0.27881	-0.0030581
296		0.020316	0.0731939	0.00561798	0.111038	0.150433	0.0501217	-0.0366492	-0.0469484	0.113169	0.0179168	0.239379	0.00414938	-0.0512115	0.0075188	0.0881119	0.10341	0.104618	0.077381	0.00363636	0.0301205	0.129305	1.14093	-0.122074	-0.0304147	0.213559	0.114583	-0.0484037	-0.0896057	0.909866	0.129678	0.140295	0.0183727	-0.00877193	0.228277	0.0843305	0.251029	-0.108108	0.146497	0.0884354	0.0897984	0.182176	0.0774566	0.0768703	0.190795	0.0140845	0.143582	0.446097	-0.0539291
297		0.0417633	0.0719697	0.101025	0.0457124	0.17319	0.0673776	0.0263158	0.0815851	0.0756303	-0.0299401	0.268172	0.0589452	-0.0219348	0.0202899	0.0502035	0.0757324	-0.0118505	-0.0223124	-0.0347349	-0.175793	0.101201	0.951952	-0.0677686	0.0457944	0.135135	-0.0387409	0.00201613	0.0222222	1.00247	0.122986	0.106882	0.201072	0.0765077	0.0210084	0.054755	-0.0498084	-0.12973	0.168033	-0.081761	0.0970516	0.194839	0.0375587	0.0404218	0.172233	0.0693642	0.184461	0.363971	-0.0699844
298		0.00234192	0.0349716	-0.0255682	0.0578735	0.125644	0.04696	0.00540541	-0.0248307	0.114823	0.047561	0.194142	0.0180276	0.0128277	0.107632	0.0346741	-0.045552	-0.0844687	-0.028169	-0.0728242	-0.238938	0.0902737	1.11343	-0.0876033	0.11284	0.20143	0.0585176	0.0487805	-0.202797	1.01248	0.107239	0.102809	0.195767	-0.00807175	0.303817	0.0450346	0.125506	0.10137	0	-0.00662252	0.136196	0.147757	0.0409091	0.0437478	0.175474	0.289157	0.15879	0.378428	-0.0662651
299		0.0506912	0.0630631	-0.0518519	0.0909701	0.0891515	0.0331519	-0.0117647	-0.121622	0.151125	0.0178842	0.256562	0.0411255	0.0335037	0.00581395	0.0668486	0.0599334	-0.00364964	0.0336634	-0.0794224	0.0310559	0.119244	1.09226	-0.00660066	0.100193	0.227986	-0.0307692	0.113759	-0.139706	0.814356	0.113335	0.107726	-0.106061	0.0954588	0.30898	0.0493326	0.130081	-0.0231214	-0.00809717	0.0666667	0.0943862	0.119681	0.0282353	0.0333565	0.168974	0.255385	0.198139	0.353497	0.058642
300		0.0701546	0.13674	-0.0166415	0.0731539	0.11298	0.0201342	-0.0853994	0.0162791	-0.035124	0.0631415	0.186904	0.00519211	-0.00711642	0.115789	0.105263	0.0575221	-0.0371714	0.0215385	-0.0716846	-0.0560472	0.0524496	1.06344	0.0334448	0.0579151	0.153252	0.105541	0.0712074	-0.0334572	0.753659	0.098153	0.162593	0.0178117	0.060306	0.190751	0.0851809	0.245902	-0.0868347	0.0354906	0.0451613	0.104785	0.194839	0.0603248	0.0531161	0.1875	0.0571429	0.171322	0.321839	-0.00466563
301		-0.016317	0.0809	0.0179104	0.115135	0.037037	0.0863345	0.00266667	-0.115124	0.0815273	0.0204331	0.1854	0.0483193	0.0248217	0.108365	0.0218579	0.0267906	-0.0730388	-0.00203252	0.00910747	-0.0402299	0.0918485	0.985294	-0.0181219	0.0515267	0.0959206	0.0818414	0.156419	-0.137809	0.695652	0.133724	0.140781	0.0749354	0.107176	0.184862	0.108462	0.0769231	0.0659026	0.0685484	0.115265	0.0669915	0.198917	0.0836278	0.0215427	0.198367	0.175074	0.186999	0.341912	-0.205329
302		-0.121669	0.111219	0.092006	0.106602	0.0548876	0.0443006	-0.0807799	0.0473934	0.121495	0.0503067	0.224896	0.0485232	-0.0104046	0.0900099	-0.0977242	0.0203632	0.0836431	-0.015544	-0.0477816	0.0635838	0.159184	1.07407	-0.18802	0.0536398	0.231917	0.101036	0.123316	0.0763359	0.756458	0.0775793	0.122107	0.00990099	0.0535055	0.21131	0.103655	0.219298	0	-0.077551	0.122112	0.101431	0.238095	0.0673077	0.00680272	0.184047	0.196532	0.182685	0.236084	-0.134557
303		-0.033839	0.0914397	0.00609756	0.0685305	0.136531	-0.037216	-0.0287356	-0.00938967	0.088204	-0.0124054	0.20357	0.0651261	-0.0451687	0.08413	0.0760719	0.0258137	-0.00548446	-0.0237358	-0.0357143	-0.135802	0.0800701	1.1041	-0.103918	0.032567	0.17407	0.109961	0.111111	-0.106227	0.8675	0.0966184	0.0901333	0.184211	0.00273473	0.203077	0.105263	0.122363	0.00558659	0.125265	0.0763889	0.045679	0.14094	-0.0161663	0.0211864	0.133956	0.189802	0.178389	0.466019	-0.0393701
304		-0.0322581	0.121094	0.0799397	0.107455	-0.0204082	-0.000489476	0	0.0469484	0.0296221	0.0221948	0.202086	0.049676	0	0.138943	0.10153	0.0161921	0.00932836	0.00736067	-0.0780399	-0.0214067	0.0651163	1.01199	-0.197279	0.0606061	0.0729517	0.1	0.0621707	-0.0620155	0.876084	0.168984	0.117899	0.0777202	-0.0596616	0.286604	0.0676073	0.165957	-0.0508475	0.048218	0.117057	0.0568182	0.269588	-0.0807018	0.00386372	0.190008	0.22449	0.24043	0.353728	-0.0168971
305		0.0243902	0.133106	-0.00909091	0.0563332	0.181723	-0.0192213	-0.0857143	0.0566038	0.169133	0.0232699	0.186615	0.0104603	0.032593	0.125249	0.00701262	0.0994883	-0.0692521	0.0186335	-0.106306	0.0235294	0.0371216	1.20584	0.027027	0.0467112	0.123348	0.163265	0.0992529	-0.142857	1.03645	0.135515	0.113161	0.0341207	0.0648148	0.218425	0.0674487	0.0632911	-0.282051	0.0993658	0.16263	0.102144	0.182065	0.0517449	0.0765957	0.179798	0.28125	0.245807	0.302505	-0.165663
306		0.0224852	0.0439401	0.0637037	0.131405	-0.0434565	0.000489956	-0.0493151	-0.0810811	0.111583	-0.00333839	0.223268	0.0429319	-0.0368046	0.0692683	0.0137741	0.0242664	0.0166359	0.138528	-0.0441176	-0.0914634	0.0624264	1.02985	0.0311419	0.0433071	0.109497	0.1481	0.0767613	-0.0812721	0.726474	0.11415	0.0627994	0.104396	0.0770677	0.187135	0.103659	0.130435	0.0662824	0.00813008	0.0794702	0.0584577	0.2	0.0598086	0.0148725	0.208579	0.0520231	0.222399	0.458498	0.0170543
307		0.0417633	0.0624064	0.0105263	0.025153	0.191581	0.00826446	0.0608696	0	0.0274262	0.0220049	0.190335	0.0942982	-0.0224057	0.0287413	-0.0240453	0.0797267	0.0321361	0.018595	-0.0562613	-0.037037	0.108876	1.08062	-0.120543	-0.00394477	0.153318	0.178046	0.0823529	-0.0977444	1.07673	0.105221	0.106464	0.106383	0.121212	0.221154	0.0572634	0.283843	-0.017341	0.0347826	0.164384	0.127534	0.279778	0.0668203	0.00625434	0.153342	0.240506	0.240407	0.375723	-0.1375
308		0.052755	0.0959174	0.0516717	0.0816536	0.0183988	0.0295114	-0.0790191	-0.0413625	0.170838	0.0776427	0.167019	-0.00729927	0.0490654	0.145349	-0.0773333	0.0265387	0.0131332	-0.0686869	-0.134276	-0.0202899	0.113703	0.901786	-0.0120275	0.121	0.148233	0.125326	0.101512	-0.00740741	0.75	0.113295	0.0549974	0.125683	0.0127273	0.174699	0.101869	0.0173913	-0.174785	0.030303	0.0866667	0.0675845	0.153639	0.0128056	-0.0402239	0.164406	0.0843373	0.257758	0.473477	-0.11938
309		0.00342857	0.0709612	0.0296736	0.0696721	0.167112	0.0307167	0.045977	-0.0188679	-0.0123711	0.0522038	0.124094	0.0580645	0.000585138	0.0727817	0.075	0.146158	-0.00189394	-0.146	-0.0934744	-0.230994	0.086217	1.03091	0.0265487	0.000987167	0.166475	0.192463	0.105932	-0.12	0.782772	0.176729	0.128054	0.0179949	-0.0196078	0.251885	0.10083	0.105691	-0.124294	-0.0401606	0.0516129	0.0287814	0.110236	-0.0922385	-0.035876	0.153878	0.277937	0.239341	0.279468	-0.0319635
310		-0.013986	0.0868263	-0.0139535	0.0734424	0.162641	0.0388971	0.0308123	0.00985222	0.0729167	0.0914214	0.0800839	0.00869565	-0.0426651	0.0658683	-0.00277778	0.0787949	-0.0378788	-0.0279214	-0.0945455	-0.131579	0.14878	1.05975	-0.0492958	0.0395939	0.116763	0.216252	-0.212302	0.0204082	0.679697	0.153103	0.0655426	0.0978261	0.0355805	0.0933735	0.045509	0.026087	-0.0416667	0.12766	0.157143	0.0749186	0.207703	0.0387409	0.0468359	0.161909	0	0.200241	0.431776	-0.2
311		0.0350467	0.0563241	0.037594	0.129852	0.00858152	0.0730503	-0.388889	-0.0291262	0.039749	0.0597109	0.143962	0.0608324	0.0258976	0.093412	0.064194	0.0157658	0.00864553	-0.0479167	-0.0205607	-0.0736196	0.0824373	0.990826	-0.102007	-0.0215164	0.231285	0.0025641	0.14128	-0.0763636	0.933926	0.0793735	0.0523177	0.157333	0.0312796	0.141566	0.0856454	0.075	-0.0294118	0.0261569	0.117647	0.122172	0.234332	0.0799537	0.0706778	0.203976	0.154286	0.189407	0.396825	-0.195159
312		-0.00702576	0.0289926	0.0518053	0.112143	0.210278	0.0184171	0.00552486	0.00244499	0.0486258	0.0604622	0.138618	0.0226537	0.0337478	0.11359	0.0565517	0.0177447	0.0763209	0.0251572	0.028463	0.0151976	0.0926594	0.981763	-0.242685	0.104781	0.154472	0.0925222	0.12967	-0.169675	0.830424	0.115605	0.0555095	0.131367	0.125841	0.257669	-0.00296033	0.106383	-0.0432277	0.0165289	0.00645161	0.0980892	0.183448	0.0834313	0.0193687	0.184189	0.172205	0.132259	0.241245	0.0112721
313		0.0463415	0.0254364	0.0046225	0.02068	-0.0124095	0.0599901	-0.0176471	0.0653753	0.0961538	0.0887762	0.168568	0.0429185	0.00877193	0.0376812	0.0533911	-0.0022818	0.022439	-0.0684647	-0.0112782	-0.116564	0.0658754	1.1252	0.0236794	0.0971074	0.260369	0.136786	0.0984683	0.0153846	0.863291	0.100664	0.096968	0.117166	0.0932039	0.215625	0.144945	0.0729614	-0.0914454	-0.199179	0.204152	0.117233	0.174387	0.0454545	0.00897666	0.208054	0.0670732	0.219833	0.358871	0.0548387
314		-0.0441001	0.0609944	0.1406	0.0147783	0.0335224	-0.011225	-0.104046	-0.192399	0.142232	0.0294118	0.145242	0.0702128	0.0467785	0.065723	0.0644258	0.0469208	0.0166178	-0.0457782	-0.0789474	-0.273239	0.0686747	1.06512	-0.0588235	0.0511535	0.166276	0.0519481	-0.0303688	0.00769231	0.768448	0.10176	0.122455	0.0819672	0.0245821	0.23913	0.0376214	0.378995	-0.0147493	0.187905	0.0479452	0.0361446	0.133515	0.120482	-0.0267606	0.148418	0.0795455	0.19137	0.520661	0.0522876
315		0.003663	0.0544184	0.105181	0.0468145	-0.00458015	0.0492292	0	-0.0616114	0.0119435	0.0759013	0.165523	0.0616216	-0.0507375	0.0750751	0.109145	0.038687	-0.0709555	0.0234542	0.0165138	-0.00649351	0.0759804	1.04673	-0.0667838	0.0449898	0.236407	0.164179	0.0634573	-0.131086	1.02478	0.123258	0.0848115	0.0448549	0.0412272	0.272727	0.0652174	-0.105882	-0.0666667	-0.034188	0.114865	0.0801796	0.105193	0.0275449	0.0627253	0.138912	0.139394	0.203462	0.261993	-0.14093
316		-0.04	0.0376095	0.0446841	0.0399722	0.17725	0.02526	0.0171429	-0.0643564	0.047619	0.00158178	0.197961	-0.020585	-0.0105581	0.037336	0.0156472	0.135831	-0.0146056	0.0266809	-0.0881226	-0.0222222	0.0783133	1.11969	-0.0960549	0.0380267	0.270758	0.129853	-0.0926316	0.0578512	0.602439	0.125515	0.0434783	0.120419	0.0951456	0.118182	0.0807834	0.210526	-0.0181818	0.0655391	0.0536913	0.0726916	0.217151	0.0261283	0.0439757	0.153518	0.165165	0.176377	0.363985	0.046549
317		-0.0873786	0.0123203	0.0703364	0.00871384	0.202228	0.0190381	-0.0944444	-0.042394	0.102174	0.00699301	0.196398	0.0206746	0.00568692	0.042	0.0767085	0.0482204	-0.0112994	0.00324324	0.00380228	-0.10828	0.0848297	1.12539	-0.0574506	-0.024975	0.16726	0.130208	0.0462863	-0.153846	0.64676	0.148712	0.067369	0.00552486	0.0737463	0.165402	0.108959	0.2	-0.0563798	0.0494624	0.148789	0.112704	0.0727023	0.0598504	0.0187997	0.180723	0.127907	0.181924	0.334702	0.0115321
318		0	-0.00152517	-0.00934579	0.054984	-0.0379221	0.043043	-0.0692521	0.0603015	0.0545852	-0.00351325	0.153581	0.0584344	0.00358423	0.0841683	0.0739191	0.0462428	-0.0299517	0.0193966	-0.0133843	-0.0949367	0.128237	1.17236	-0.0916955	0.0549793	0.146758	0.150066	0.0789766	-0.095057	0.608532	0.04453	0.0512387	0.10989	0.0622568	0.214286	0.0986602	0.142857	0.0535714	0.010395	0.0709677	0.121212	0.255289	0.0917759	0.0169972	0.232166	0.226586	0.133305	0.410101	-0.0309951
319		0.02457	0.0318602	-0.0917874	-0.0203366	0.0236469	0.0574479	-0.0962099	-0.0523691	0.171585	-0.0345711	0.106723	0.0430939	0.00394059	0.079803	-0.0141643	0.00992991	-0.042885	0.0572687	-0.148218	0.0384615	0.148308	0.91875	0.00699301	0.0407332	0.218225	0.0998668	0.0607375	-0.100372	0.703794	0.0805556	0.0841695	0.0785908	0.0342801	0.232745	0.0609982	0.0643777	-0.03125	0.209402	0.127148	0.108924	0.180926	0.0193705	0.0353026	0.189846	0.184524	0.147831	0.432271	0.083612
320		0.0352369	0.0488935	0.009375	0.0984238	0.0663788	0.0858018	0.091954	0.00779221	0.0662252	0.0348387	0.175858	0.0235546	-0.0324714	0.0645161	0.0703812	0.0535396	0.0261882	0.0993521	-0.0356473	0.044586	0.121027	1.15842	-0.0989011	0.0458716	0.120381	0.0950469	0.120709	0	0.68	0.0804403	0.102809	-0.0903955	-0.0186457	0.228228	0.069969	0.140271	-0.153846	0.179266	0.173913	0.111257	0.170455	0.174684	0.0446364	0.152807	0.0750751	0.150815	0.456033	-0.162791
321		0.0582278	0.0565844	0.0217391	0.056212	0.0961338	0.0837589	0.0517241	-0.0330789	0.0710383	0.0226831	0.0974359	0.0332594	-0.0899313	0.0872618	0.064194	0.142199	0.0704501	0.0031746	-0.025641	-0.21519	0.037929	1.07006	-0.0106572	-0.0680203	0.286935	0.081225	0.0557377	-0.0641509	0.669565	0.106667	0.0701853	0.0108108	0.0338164	0.121076	0.0947631	0.290909	-0.104938	0.0576132	0.0299003	0.0814625	0.187668	0.0603865	0.0633828	0.182007	0.192771	0.184076	0.392857	-0.208861
322		-0.0839506	0.0299949	-0.118644	0.0655271	0.12271	0.0672736	-0.0542169	-0.0291777	0.0456522	0.0237484	0.0905116	0.0925714	0.0178951	-0.00682927	0.0916905	-0.0495726	-0.0398445	-0.107296	0.0360531	-0.11465	0.10392	1.14357	-0.0464716	0.0680412	0.077381	0.111111	0.108954	-0.111969	0.944882	0.118683	0.0907023	0.104225	0.054902	0.257862	0.0574282	0.181395	-0.0392749	0.0893246	-0.138264	0.0412574	0.0909091	0.176768	0.0370642	0.205326	0.223242	0.209745	0.293893	0.0636215
323		-0.00122399	0.0549563	0.0713154	0.0925459	0.191348	0.0294416	0.025788	-0.038835	0.0221729	0.0754098	0.109495	0.0303688	0.0367223	0.0454545	0.104046	-0.0320513	-0.0592809	-0.0774194	0.046332	-0.181518	0.0659273	1.06472	0.0390071	0.0493454	0.204878	0.145578	0.0248112	-0.112782	0.788512	0.0712503	0.0758815	0.189041	0.0177866	0.301887	0.0157576	0.0933333	-0.0914634	0	0.105634	0.132498	0.151934	0.0170316	0.0953599	0.147083	0.0869565	0.156176	0.445585	-0.0825397
324		-0.0389294	0.111111	-0.0559006	0.112343	0.0987791	0.0859454	0.0028169	0.161954	0.118421	0.0839947	0.124782	-0.0283224	-0.00909642	-0.00788955	0.0424929	-0.0539906	-0.0291829	-0.0336591	-0.0294118	-0.113772	0.05387	0.915858	-0.175043	0.0217617	0.077374	0.134487	0.131952	0.019305	0.71875	0.115558	0.0687861	-0.0517711	-0.0356112	0.327074	0.0465549	-0.0165289	-0.211765	0.116773	0.0648464	0.100592	0.226891	0.0635118	0.0917095	0.146599	0.134969	0.209043	0.592593	-0.143307
325		0.017284	-0.0265577	0.0390879	0.0968208	0.0215563	0.0439673	0.0238095	-0.015873	-0.0883315	0.0754899	0.0554622	0.114572	-0.0439494	0.0649087	0.108571	-0.0128957	0.0455446	-0.0209482	-0.118199	-0.17757	0.0259259	0.964912	-0.0722022	0.0353635	0.149533	0.108497	0.0541667	-0.1875	0.940594	0.174878	0.128753	0.0991501	0.0196078	0.297468	0.134309	0.0822511	-0.111111	0.133192	-0.0402685	0.111695	0.285118	0.0668287	0.0299003	0.19249	0.134146	0.166637	0.435146	-0.207576
326		0.0644753	0.0215827	0.00327869	0.0962224	-0.00314961	0.061754	-0.0965909	-0.185567	-0.0374449	0.0640942	0.105862	0.0528587	-0.0202112	-0.0218254	-0.0084507	0.0178571	0.00583658	0.0176991	-0.0272374	-0.08	0.0549722	1.14075	-0.0436364	0.0544707	0.151589	0.147849	0.106667	0.0725806	0.908745	0.164265	0.145905	0.239521	0.0227948	0.162577	0.0385101	0.213592	-0.123457	0.0966387	0.0428571	0.0876963	0.185495	0.0876289	0.0203027	0.146984	0.160494	0.173525	0.426829	-0.0547264
327		-0.0163112	0.056902	0.0173228	0.101206	-0.060654	0.0510204	-0.0969697	-0.0483461	0.0195178	0.00779221	0.0779956	0.0496141	-0.0199129	0.0509165	0.0114613	0.0317369	0.0654582	-0.0672547	0.204082	-0.00325733	0.0919255	0.971061	-0.124138	-0.0121457	0.151732	-0.0437086	-0.0265487	0.0549451	0.569116	0.111611	0.108578	-0.0249307	-0.0928854	0.355556	0.0804307	0.263636	-0.190184	-0.0489796	0.144828	0.106411	0.310734	0.159314	-0.00146092	0.191674	0.139241	0.130871	0.440154	0.0216306
328		0.0755442	0.113089	0.0411392	0.0528651	-0.042496	0.0361323	0.0919881	-0.102362	0.0627803	0.0517639	0.12244	0.0278422	-0.036452	-0.00303951	-0.00143472	0.02558	0.034413	-0.0659341	-0.0687623	-0.0828025	0.0874148	1.13531	-0.0383944	-0.0153689	0.213675	0.0552486	0.0709677	0.0583658	0.929504	0.129325	0.0555076	0.0971429	0.0491474	0.27218	0.0519645	0.1	-0.10559	-0.0472279	0.257353	0.135458	0.157182	0.113022	0.0516224	0.150589	0.148265	0.168355	0.4714	0.00333333
329		-0.00873908	0.0905196	-0.16	0.0614934	-0.0359562	0.0453629	0.154762	-0.0773196	-0.0299003	0.0320681	0.0746655	0.0847085	-0.0278543	0.0341365	0.070028	-0.0753828	-0.0246792	-0.0687023	-0.00601202	-0.0774411	0.0564904	1.00331	-0.02693	-0.0351759	0.203369	0.105624	-0.0447761	0.057377	0.735256	0.101273	0.0124344	0.135593	-0.0752688	0.378981	0.0532319	0.176471	-0.0186335	0.105832	0.0588235	-0.0219072	0.160665	0.135338	0.0608309	0.23563	0.157233	0.210013	0.497992	-0.188679
330		0.121053	-0.00717213	-0.0114943	0.0368497	0.117032	0.065641	0.11976	0.0588235	0.175926	0.0648918	0.0966638	-0.0211346	-0.0407101	0.00308325	0.00729927	-0.0701754	-0.0118812	0.0109649	-0.0951456	0.0457516	0.0342253	1.096	-0.0485612	0.0674157	0.159905	0.134328	0.076075	-0.0384615	0.764861	0.105956	0.0684541	-0.0704225	-0.0359281	0.38535	0.0434235	0.185185	-0.277778	-0.0204082	0.0449827	0.124078	0.215956	0.163212	0.0422328	0.21835	0.00606061	0.193264	0.268775	0.00160514
331		-0.00253165	0.10334	0.0276423	0.108639	-0.032839	-0.0226337	-0.0946746	0.0597403	0.0519187	0.0486842	0.124339	-0.0491429	-0.0205352	0.0225873	0.0534125	0.00904704	0.0292634	0.043578	-0.097166	-0.0460526	0.0258621	1.0469	-0.0515098	0.0197711	0.179976	0.130312	0.210221	0.0873016	0.983849	0.113752	0.0576251	0.0914286	-0.037037	0.245161	0.0716113	0.174129	-0.121212	-0.0174672	0	0.0963061	0.0906593	0.111675	0.0202551	0.154482	0.201278	0.232481	0.52459	0.02
332		0.0114943	-0.0589463	-0.00157978	0.0614769	0.0162426	0.0258193	-0.0578035	-0.112821	0.118232	0.0724161	0.173837	-0.00441501	-0.0184957	0.0164271	-0.0361111	-0.0553267	0.103378	0.00552486	0.027027	-0.0576923	0.0832298	1.11371	0.144385	0.0849948	0.178698	0.168317	0.107143	-0.118774	0.84557	0.125977	0.0850202	0.0457143	-0.0462144	0.353698	0.0679487	0.303965	-0.183432	0.0691824	0.0295082	0.0989446	0.211348	0.0310559	0.00369276	0.172076	0.124183	0.213664	0.565762	0.0170068
333		0.0591327	0.0589463	0.0223642	0.091997	0.209409	0.0924974	-0.121662	-0.0520833	0.125	0.0627698	0.186425	0.0281215	-0.0117502	0.0102669	0.14881	0.104567	0.0625	0.00109529	-0.0678295	-0.02	0.0853583	1.0601	-0.00541516	-0.0338308	0.101296	0.0788043	0.159683	-0.0881226	0.750339	0.0970171	0.035118	0.0393258	-0.0289133	0.373134	0.0838548	0.363636	-0.0869565	0.154867	-0.0431655	0.0658762	0.285094	0.0881988	-0.0161884	0.177866	0.196203	0.18027	0.378601	-0.0503356
334		-0.0369427	0.0842105	-0.0457516	0.0360997	0.115942	0.0516971	-0.160714	0.122078	0	0.103611	0.200528	0.102975	0.0160692	0.0322581	0.00979021	0.141408	-0.00610998	-0.0887185	-0.0544747	-0.0714286	0.0811486	0.987261	-0.0573477	0.0316004	0.125891	0.100671	0.0143646	-0.270175	0.831551	0.162915	0.0236887	0.101124	-0.00498504	0.209953	0.0272324	0.00465116	0.0875	0.0697674	0.104167	0.0881175	0.213873	0.026699	-0.000729927	0.207982	0.17284	0.189057	0.320792	-0.0562914
335		-0.0284238	0.0452889	-0.1168	0.110269	0.15891	0.0289555	-0.115607	-0.0127877	0.0481523	0.0902988	0.160998	-0.0608696	0.0133915	0.0478128	0.131075	0.109273	0.00206186	0.0609081	-0.0775348	-0.0754717	0.0780669	1.03871	-0.00722022	-0.0205761	0.134293	0.112011	0.0481283	0.008	0.710561	0.197221	0.102659	0.048913	0.0197628	0.332288	-0.00687071	0.103774	0.0792683	0.138655	0.0449827	0.0693333	0.261765	-0.0137328	0.0358355	0.219839	0.0306748	0.22215	0.466942	-0.126712
336		-0.0322581	0.0905218	-0.0210016	0.0965543	0.01	0.0162602	0.10119	0.0697674	0.10289	0.105442	0.19787	-0.0577778	0.0133416	0.0186722	0.0911765	0.145596	0.0203666	-0.104612	0.0102669	-0.0980392	0.163357	1.25424	-0.204981	0.0453109	0.112455	-0.00543478	0.141907	0.1	0.887955	0.130256	0.0839041	0.182353	-0.0313725	0.264615	0.131392	0.0958904	-0.208589	0.0948276	0.174377	0.0735586	0.204023	0.106274	-0.0291916	0.156104	0.210843	0.227235	0.43913	0.108108
337		-0.00502513	-0.0406762	-0.0466989	0.053591	0.150693	-0.00509165	-0.0375	0.136	0.0156951	0.0722769	0.147072	-0.0291715	0.0621293	-0.0763052	0.0742358	0.116114	-0.00715015	-0.0204082	0.0325203	-0.076412	0.126263	1.10491	-0.163732	0.111801	0.128641	0.0700809	0.059867	-0.0980392	1.47403	0.0960875	0.0657932	0.177143	-0.0346192	0.281005	0.0610932	0.0689655	-0.154321	-0.0108932	0.0875912	0.0730717	0.172119	0.179554	0.0348221	0.176445	0.225	0.164803	0.485772	0.00657895
338		-0.064803	-0.020494	-0.159055	0.102584	0.0160256	-0.00719424	-0.054878	0.146067	0.0508475	0.0761969	0.156637	0.0319635	-0.00500939	0.033543	-0.114613	0.127381	0.0299145	-0.0507328	-0.0404858	-0.258503	0.127646	1.04894	-0.0226415	0.0718884	0.110843	0.160284	0.0978628	-0.132812	0.881148	0.177204	0.0640843	0.14881	0.0173647	0.473868	0.0822454	0.0530973	-0.118541	0.131403	0.00714286	0.0879265	0.204644	0.0878113	0.023361	0.206213	0.405229	0.205685	0.588496	0.0865874
339		0.0872483	-0.0269984	0.013289	0.0549285	0.135788	0.000521648	-0.0584615	-0.0899471	0.0913405	0.0296964	0.179165	-0.0563063	-0.020711	0.07628	0.139912	-0.0306604	0.0313152	-0.00792752	0.00420168	-0.130159	0.17299	1.16972	0.0206379	0.00211416	0.080148	0.120567	0.0593407	0.00833333	0.695418	0.11189	0.0435525	0.0368272	-0.109091	0.373534	0.0854922	0.131707	-0.214724	0.0578512	-0.0650685	0.105298	0.211765	0.0751295	0.0666667	0.145936	0.125382	0.199194	0.526423	-0.0199336
340		-0.0815006	-0.0128068	-0.0344828	0.0477281	0.125148	0.0409712	-0.0464396	-0.0826667	-0.0986395	0.0629038	0.193636	-0.0674157	0.0293283	0.0378151	-0.00998573	0.057211	-0.0407332	-0.0337838	-0.0430528	0.033557	0.0423077	1.16554	-0.0405904	0.00312826	0.147929	0.174964	0.0247748	-0.165414	0.793011	0.149725	0.0197991	0.229462	-0.107178	0.32879	0.0636364	0.0625	-0.111111	-0.0444444	-0.0327273	0.139136	0.238784	0.0173697	0.0672301	0.193065	0.185897	0.197187	0.578723	0.0238908
341		-0.0661578	0.0237838	-0.169381	0.0465922	0.113356	-0.0303342	0	0.0216216	0.0593607	0.0675307	0.107679	-0.0394432	-0.0219024	-0.00829876	-0.0168539	0.0846655	-0.0483871	-0.10962	-0.0163265	0.0567376	0.0513988	0.949917	-0.010989	0.044586	0.151292	0.107345	0.112613	0.0194553	0.973404	0.129881	0.152633	0.140351	-0.0531595	0.392796	0.0936088	0.130841	-0.00990099	0.155251	0.163636	0.106176	0.243553	0.137976	0.0539012	0.177545	0.238095	0.240905	0.545455	0.150592
342		-0.0633245	0.0806193	-0.0383973	0.0667696	0.117358	0.0761264	-0.0432099	-0.0178117	-0.144812	0.0187416	0.18552	-0.00458716	-0.00811993	0.0903156	0.0812408	-0.0743125	0.0498474	-0.00915332	0	-0.0434783	0.109222	0.917241	0.0242537	0.0992529	0.210851	0.106082	0.038674	-0.0364372	0.861496	0.0695527	0.0733104	0.0909091	-0.082	0.411565	0.0478689	0.214286	-0.31677	0.102679	0.17037	0.141274	0.0135501	0.0948718	0.0525918	0.171768	0.314286	0.196069	0.479339	-0.0198675
343		0.0132275	0.0648501	-0.0858995	0.0219146	0.0237966	-0.0130276	0.00641026	0.0324324	0.0446009	0.0499662	0.115157	-0.0699301	0.0356008	-0.0521921	0.13242	0.139658	0.0157398	0.00917431	0.010142	-0.041958	0.12987	1.49911	-0.0588235	0.0832432	0.0633971	-0.0387812	0.0644068	-0.147287	1.44719	0.201071	0.0396068	0.081571	-0.0623742	0.42132	0.0365535	0.259615	-0.301887	0.0488889	0.0867925	0.0977748	0.238095	0.0826873	0.0501157	0.145338	0.25625	0.197778	0.619048	0.0673575
344		0.0187166	0.0724157	0	0.0445127	0.065538	-0.00621762	-0.0372671	-0.014245	-0.0375427	0.0600683	0.15157	-0.102653	0.0433397	0.154185	0.165138	-0.0826397	-0.00315457	-0.0656285	0.00409836	-0.0572391	0.0275112	0.996599	-0.102941	0.167038	0.057971	0.0657343	0.0818584	-0.0850202	0.738636	0.03344	0.0657439	0.288235	-0.0030581	0.360406	0.0496732	0.104762	-0.170569	0.077951	0.198444	0.0868079	0.152047	0.178046	0.0139887	0.118107	0.15016	0.227672	0.7	0.031614
345		0.0738255	0.0490928	0.0390492	0.104069	-0.0148433	0.0487805	0.0031746	-0.123288	0.0742459	0.0341064	0.028394	-0.00692841	0.0376276	0.0507012	0.133531	0.0172414	-0.0384216	-0.0381166	-0.0916497	-0.0596491	0.0907903	0.993289	-0.0577281	-0.0459893	0.0652174	0.0165289	0.0734967	0.0873016	0.802168	0.081385	0.0854301	0.147929	0.098242	0.484321	0.0325098	0.237624	0	0.111579	0.137255	0.131707	0.23994	0.0982962	0.0832685	0.198905	0.320261	0.182493	0.652542	0.106457
346		0.00265252	0.135434	-0.0231788	0.069225	0.138234	0.0419543	-0.179641	-0.0844687	-0.0696056	0.0108328	0.0650516	-0.0363423	0.0123137	0.0496614	0.0853659	0.0920097	0.0213675	-0.00234192	0.132924	-0.204013	0.0751979	1.31065	0.0248566	0.0745614	0.0666667	0.0716253	0.0855856	-0.110204	1.11111	0.0882266	0.0335689	0.179811	0.0327198	0.494774	0.0482315	0.28	-0.144654	0.15	0.117871	0.0755616	0.221557	0.0946822	0.0989181	0.206467	0.224242	0.197532	0.408998	0.174216
347		-0.0533333	0.102063	-0.0646766	0.0455415	0.0802504	0.0455276	-0.00628931	0.0104712	0.0446009	0.0160464	0.0929401	-0.0362573	0.0282595	0.113586	0.11315	-0.0258824	0.0240838	-0.0114155	0.0373281	-0.0884354	0.0932476	1.17926	-0.0981132	-0.0503751	0.2275	0.0952381	0.0454545	0.113725	0.667598	0.11319	0.108147	0.0523256	0.00208768	0.39219	0.0380577	0.176471	-0.182927	0.086758	0.115942	0.10729	0.240964	0.135484	0.091621	0.199721	0.18612	0.173273	0.610526	0.0679934
348		0.0354796	0.036632	-0.0258176	0.0468448	0.184504	-0.00893326	0.0536278	0.0489914	0.0570431	-0.00034188	0.0852298	-0.00941176	0.0435914	0.114064	0.0974843	0.0926254	0.075594	-0.00230415	0.0605428	-0.0171821	0.158528	0.983444	-0.125	0.123789	0.0937896	0.134978	0.0145577	-0.0703125	0.904494	0.109771	0.0214866	0.131195	0.0331263	0.410959	0.035499	0.0984456	-0.134375	0.107062	-0.00689655	0.100341	0.101322	0.139108	0.106137	0.213588	0.357143	0.208438	0.511387	0.144852
349		0.0478796	0.0269397	-0.0152801	0.0649553	0.0945055	-0.0380289	-0.0361446	-0.0163043	0.038687	0.031337	0.16787	-0.0468384	-0.00707395	0.0694143	0.0455927	-0.0182039	-0.0455487	-0.0191847	0.0251046	-0.0902778	0.0828441	1.2024	-0.0597303	0.0574586	0.140351	0.00414938	-0.0278087	-0.201613	0.696801	0.132632	-0.00886001	0.01983	0.0570265	0.449275	0.0960901	0.302564	-0.147436	0.02407	0.186047	0.176303	0.142012	0.126649	0.0598419	0.220262	0.246835	0.181686	0.633987	0.0847458
350		0.053206	0.0597432	-0.0439024	0.0303975	0.118473	0.0296378	-0.0636943	-0.126005	0.0934911	-0.0328834	0.165225	0.0431739	0.00321543	0.119454	0.0432191	0.0490988	-0.00634249	0.070922	-0.162887	-0.102041	0.117647	1	-0.241636	-0.0326797	0.16303	0.236641	0.045977	-0.00847458	1.05337	0.135442	0.0863623	0.0714286	0.0580781	0.520548	0.0132802	0.177033	-0.198718	0.0755556	0.00740741	0.0787132	0.167647	0.11335	0.0814132	0.198144	0.264516	0.183025	0.501048	-0.227564
351		0.090411	0.127072	-0.0844595	0.0141287	0.0999429	-0.02851	-0.161905	-0.0531915	0.0671296	0.0418095	0.162113	-0.00826446	0.0267656	0.0407041	0.0425532	0.0658537	0.0144928	-0.0056243	-0.0227743	-0.0514706	0.0868687	1.26071	-0.148148	0.120709	0.129697	0.185185	0.0818182	0.0512821	0.881543	0.139746	0.0247934	0	0.12395	0.420875	0.0696721	-0.0925926	-0.198718	0.209412	-0.0636704	0.135447	0.0749646	0.14888	0.0148206	0.178231	0.326797	0.177978	0.605322	-0.0501672
352		-0.0641711	0.0317287	-0.0622837	0.00582977	0.0557088	0.00873362	-0.0282132	-0.00864553	-0.0458937	0.0420513	0.164179	-0.0421546	0.0411496	0.077951	0.0903427	0.00371747	0.0269687	-0.00470588	-0.0920245	-0.0883392	0.081225	1.28832	-0.15879	-0.0457516	0.134663	0.114754	0.00232558	-0.0603448	1.0198	0.0755342	0.0819868	0.190031	0.0463862	0.45	0.00850229	0.280423	-0.198697	0.107296	-0.0110701	0.115932	0.13943	0.0591327	0.0513927	0.22576	0.389474	0.221112	0.540659	0.185965
353		-0.0133333	-0.0171123	-0.138047	0.0289017	0.224654	0.0507919	0.182109	-0.0337079	0.0774732	0.0580373	0.137042	-0.0194647	0.0437281	0.0820399	0.0743551	0.101664	-0.0769231	-0.0175029	-0.0196937	-0.101754	0.0637156	1.14706	-0.0610687	0.0554951	0.112641	0.0969609	0.0898483	-0.313559	0.693989	0.114389	0.0627024	0.126506	-0.13641	0.540636	0.0757781	0.197917	-0.131579	0.151111	0.210938	0.134535	0.182222	0.170984	0.0434783	0.215392	0.34767	0.209916	0.575758	-0.0136986
354		0.0337382	-0.0230811	-0.0857143	0.00156128	0.0934097	0.0828238	-0.0415335	-0.0108108	-0.0415184	0.0305344	0.12742	0.0128355	0.0530452	0.0324748	0.177778	0.162264	0.0797814	0.00582072	0.0507099	-0.217105	0.0640523	1.25688	0.0606061	0.0574972	0.149199	0.103858	0.0278422	-0.112971	1.16804	0.107418	0.0419374	0.180723	-0.0165975	0.65942	-0.00723208	0.153846	-0.0873786	0.10917	0	0.0643599	0.22272	0.145478	0.0681031	0.194197	0.460526	0.185611	0.515213	0.119171
355		0.0539419	0.0530878	-0.04	0.0517308	0.251497	0.049527	0.0784314	0.01983	0.118899	0.0844476	0.0971731	-0.00352526	-0.0196078	0.095613	0.226788	0.0628432	-0.0303688	-0.0320285	0.00414938	-0.114094	0.0874425	1.22662	0.127619	0.0647321	0.054254	0.214706	0.0505747	0.0562771	0.957983	0.089651	0.0569154	0.103858	-0.0422245	0.574007	-0.0301442	-0.138614	-0.270968	0.147982	0.00358423	0.113475	0.195122	0.0954248	0.0188088	0.117944	0.369863	0.222366	0.568035	0.115044
356		-0.105541	0.0761644	-0.117148	0.0518812	0.176133	0.0341737	-0.107492	-0.185984	-0.0152047	0.0435996	0.115472	0.0385542	-0.0153144	0.0435754	0.118541	0.0160395	0.0519618	-0.04662	0.0356394	-0.084507	0.0725034	1.18773	-0.0877193	-0.0376106	0.177806	0.155882	0.15986	0.0379747	1.03889	0.0572351	0.0587189	0.319149	-0.0505263	0.470687	0.0832232	0.127451	-0.143791	0.220657	-0.019305	0.126145	0.187311	0.11958	0.00736149	0.161496	0.23839	0.223209	0.592437	0.143357
357		0.0362117	0.0408719	-0.0806175	0.00905868	0.142202	0.0702263	-0.0125786	-0.111111	0.0342298	0.0274401	0.0986931	0.0369487	0.0684661	0.0685528	0.193701	-0.00968523	0.0534188	-0.0155317	0.00404858	-0.103448	0.118872	1.10949	-0.0929368	0.0504587	0.102343	0.120112	0.117647	-0.0456432	0.615276	0.124127	0.0838826	0.0484848	0.0468085	0.535043	-0.00334896	0.173077	-0.151316	0.0762332	-0.0305344	0.110954	0.252648	0.174142	0.00421941	0.177487	0.0794702	0.225896	0.64574	0.142857
358		0.0591472	0.0418706	-0.0804598	0.0550931	0.129771	-0.0353214	0.0738255	0.114943	0.00369004	0.0449827	0.21055	0.0242718	0.000650618	0.0272628	0.146875	-0.0285714	0.0324675	-0.127229	-0.00829876	-0.146853	0.0485437	1.06463	-0.123288	-0.0266667	0.0384615	0.158209	0.0343195	0.122951	1.18598	0.120533	0.0850875	0.179811	0.0665236	0.41958	0.013245	0.0430622	-0.196013	0.146919	-0.099631	0.122435	0.158358	0.15903	-0.0366615	0.245065	0.398649	0.218379	0.638767	0.0687831
359		0.0148448	0.0698186	0.047138	0.0134564	0.147708	0.0114811	0.138365	-0.0790191	-0.00722892	0.0534031	0.113364	-0.00702576	0.0068875	0.00900901	-0.0950226	-0.0109756	0.0270856	-0.133178	0.0619835	-0.107383	0.0552901	1.23077	-0.155894	0.113143	0.10665	0.110787	-0.00345224	-0.273504	0.79473	0.157475	0.124144	0.0294118	0.0527473	0.56553	-0.0259136	-0.160377	-0.259615	0.160998	0.258964	0.0785563	-0.0342936	0.105474	0.0392	0.174286	0.337838	0.195656	0.628319	0.0953206
360		-0.0589849	0.0329793	0.0494037	-0.00156372	0.157777	-0.039489	-0.0641026	0.131965	0.109726	0.0259467	0.190257	0.0189125	-0.0234987	0.0120482	0.216174	0.0659134	0.0152174	-0.047619	-0.0413943	-0.205674	0.0697987	1.1711	-0.0661479	-0.0515695	-0.00122399	0.117037	0.0653983	-0.108225	1.15922	0.156108	0.102005	0.0993789	0.0737968	0.537931	0.0397805	0.20202	-0.101351	0.16	0.109312	0.138153	0.148368	0.201613	0.0100604	0.201496	0.285714	0.226592	0.449024	0.148862
361		-0.0192837	0.100277	0	-0.0619469	0.121806	0.00347423	-0.0949367	-0.0716332	0.0312891	0.0174581	0.122526	0.0651907	-0.0155139	0.0334487	0.136223	0.0641975	0.0248112	-0.0857143	0.0526316	-0.048951	0.0802721	1.16479	-0.245714	0.0470588	0.150259	-0.0512821	0.0604333	-0.117904	1.07018	0.129874	0.144478	0.183544	-0.0169492	0.66348	0.049291	0.116022	-0.176471	-0.0218341	0.236948	0.124098	0.14939	0.204787	-0.000784929	0.18328	0.245902	0.267623	0.611465	0.201413
362		-0.0548523	-0.0317195	-0.0856164	-0.0272798	0.156076	0.0349243	0.166102	-0.0287356	-0.00120919	0.0307692	0.0237984	0.0502392	0.0462447	0.0772676	0.224924	0.00762389	0.0597345	-0.11639	-0.0442105	-0.0833333	0.102651	1.04135	-0.228137	0.0350282	0.170604	0.0428571	0.134615	-0.0983607	1.67811	0.1101	0.0686657	0.109718	-0.0746269	0.638298	0.0254351	0.263682	-0.19863	0.171625	0.139241	0.103787	0.230769	0.109114	0.00787402	0.204491	0.344595	0.253728	0.573876	0.158451
363		-0.125	0.101351	0.028169	-0.0534113	0.2799	0.044289	0.0402685	0.0845481	0.0353228	0.0139082	0.100235	0.0795594	0.0016292	0.0200893	0.206154	0.0599876	-0.0752916	-0.0377358	0.0868687	-0.153846	0.140461	1.3871	-0.267035	0.037037	0.0539846	0.144105	0.028169	-0.0120482	0.917847	0.107098	0.0960384	0.0769231	0.118534	0.658273	0.0033761	0.0691244	-0.110345	0.230068	0.13834	0.0952381	0.125731	0.190039	-0.0524642	0.156032	0.366667	0.249223	0.720183	0.228621
364		0.0625	0.0425894	0.0325901	-0.0446359	0.147879	0.00988947	-0.214724	-0.12	0.0986267	0.0583573	0.0138122	-0.0869565	-0.00226025	0.0760499	0.0998464	0.0836551	0.064764	-0.0197445	-0.0984683	-0.128028	0.121028	1.00766	-0.0448343	0.0264672	0.0754476	0.146707	0.0469314	-0.0833333	1.22688	0.129733	0.141364	0.353535	0.0725275	0.60219	0.0882759	0.303867	-0.150502	0.247619	0.00395257	0.0935754	0.184049	0.118336	0.0139721	0.173168	0.273333	0.211	0.649007	0.0930626
365		0.0560224	-0.00111483	0.0327022	-0.0019478	0.238871	0.0347672	0.14966	0.140351	0.0840652	-0.0270848	0.167641	0.0645933	0.027027	-0.0674033	0.130435	0.0361146	0.0998902	-0.057971	-0.0504202	-0.262069	0.0510345	1.24514	0.0314961	0.12766	0.0977836	0.176642	0.121718	0.0431034	0.850969	0.144849	0.107046	0.23511	0.0646221	0.683636	0.048011	0.0412371	-0.0841751	0.184332	0.011583	0.124733	0.197691	0.214979	-0.0257426	0.111111	0.290323	0.207154	0.673469	0.114391
366		0.0480226	0.0808989	-0.123103	0.0154701	0.14531	-0.00917431	-0.0096463	-0.0202899	0.0428397	0.00851668	0.139681	0	0.0569372	0.0795455	0.185304	-0.0373134	0.0600858	-0.0358852	-0.147122	-0.205776	0.0679612	1.0972	-0.0631365	0.0792541	0.253444	0.222707	0.118129	0.166667	1.60979	0.137008	0.141104	0.143731	0.0757238	0.799257	0.0414938	0.292818	-0.280528	0.253456	0.31405	0.116921	0.219731	0.114883	0.0461783	0.173618	0.452769	0.229643	0.604494	0.228782
367		-0.0238429	0.0142388	-0.0397112	-0.00387898	0.224845	0.06698	0.15894	-0.1	0.108835	0.0131159	0.138707	0.00616523	0.0280862	0.145161	0.2352	0.028676	0.0911162	-0.0282903	0.131915	-0.149091	0.0694158	1.18614	-0.0542636	0.011655	0.0838881	0.114993	0.0365998	-0.0530612	0.766962	0.112773	0.13305	0.181818	0.148272	0.58042	0.0701876	-0.127451	-0.143791	0.156909	0.344538	0.0771429	0.127596	0.263889	0.0213777	0.232501	0.512545	0.207205	0.618304	0.139785
368		0.0162602	0.0992018	0.00530973	0.0102362	0.197508	0.0437352	0.134228	0.0262391	0.0358467	0.0495751	0.0486538	0.0641975	0.0184818	0.120977	0.250814	0.0909091	0.062635	-0.0435835	0.114094	-0.353741	0.0917743	1.07336	-0.12253	0.0460157	0.120735	0.164223	0.0292398	-0.204918	0.893983	0.0996885	0.103365	0.291291	0.0509554	0.646409	0.143059	0.34	-0.245791	0.26097	-0.0542636	0.091954	0.142438	0.188446	-0.026087	0.138902	0.150877	0.216189	0.614512	0.270321
369		-0.0784593	0.118606	-0.107527	0.0309198	0.179455	0.0350467	0.21147	-0.0594901	0.0562347	-0.00179533	0.0584354	-0.102286	0.0449438	0.126411	0.053125	0.00740741	0.031556	-0.249123	-0.0486258	-0.10219	0.123087	1.13333	-0.0481696	-0.0773543	0.149733	0.131195	0.0694935	-0.0562771	0.78012	0.0783095	0.121062	0.164557	-0.0130152	0.593388	0.0930721	0.115578	-0.254902	0.21327	0.0305344	0.0661972	0.035461	0.156129	-0.0370666	0.175845	0.382456	0.19264	0.488172	0.121157
370		0.0334789	0.0320796	-0.0459364	0.0169358	0.145112	0.0824804	-0.0726644	-0.0949721	0.0520966	0.0185252	0.131217	0.0797546	0.0734952	0.0825472	0.0656489	-0.0280374	-0.0283224	-0.0584112	0.0892449	-0.226277	0.0966831	1.23016	-0.12749	-0.0419426	0.136364	0.306626	0.114914	-0.0634921	0.752239	0.151381	0.109669	0.22449	-0.0153846	0.54827	0.0701876	0.0974359	-0.154362	0.218009	0.0688259	0.0172166	0.234646	0.107285	-0.06323	0.15251	0.370242	0.189982	0.792771	0.175824
371		0.0541311	0.0531674	0.0251799	0.0298448	0.185044	0.0766509	0.0728477	-0.108571	0.130877	-0.0101083	0.141487	0.0489845	0.034849	-0.0246085	0.148607	0.0538556	0.054505	-0.0826347	-0.0171674	-0.0510949	0.0675958	1.23459	-0.0732673	0.0339367	0.155616	0.199396	0.052381	-0.226891	0.772382	0.15632	0.116179	0.348387	0.0308571	0.802974	0.0340042	0.138462	-0.253425	0.113164	0.277108	0.122807	0.203647	0.269972	0.010101	0.202828	0.312715	0.209606	0.663677	0.02693
372		0.0115942	0.137391	0.103943	0.0458498	0.160494	0.0277942	0.0295082	-0.043956	0.0507152	0.00183621	0.13959	0.101124	0.0019802	0.147541	0.277955	0.040549	-0.0420354	0.00118343	0.0991379	-0.339286	0.0382514	0.892193	-0.06	0.0884354	0.111979	0.237519	0.0644783	0	0.534407	0.159541	0.094515	0.161905	0.0500556	0.608775	0.057377	0.1	0.0492958	0.103604	0.319328	0.144098	0.00440529	0.119481	0.00243704	0.0716946	0.456446	0.177581	0.685393	-0.00534759
373		0.021645	0.0656682	0.00367647	0.0758006	0.170135	0.121893	0.043771	-0.116147	0.129771	0.0295944	0.140133	0.0523752	0.0454087	0.0665138	0.188834	0.0793651	0.0688525	-0.0194647	0.0194384	-0.208633	0.0958333	1.09127	-0.00196464	-0.0215054	0.0327456	0.306667	0.0951792	-0.153846	0.813885	0.166988	0.102129	0.138264	0.0369565	0.56719	0.0831557	0.0606061	-0.201365	0.150442	0.208	0.142646	0.174174	0.279778	0.0277325	0.166587	0.297297	0.232707	0.70892	0.147059
374		0.017094	0.0779896	0.127737	0.0792393	0.203518	0.110852	-0.022082	-0.0379009	0.0951792	-0.00110906	0.218765	0.0132371	0.0242444	0.163594	0.262658	-0.00129032	0.0719823	0.00486618	-0.00431034	-0.149091	0.0548409	1.20463	0.0940695	0.0577576	0.150611	0.224924	0.0250896	0.00854701	0.825215	0.138916	0.150124	0.359477	0.058427	0.572464	0.115412	0.0873786	-0.250836	0.262181	0.167382	0.111913	0.0748899	0.228117	-0.0390244	0.110149	0.290102	0.215162	0.742729	0.179104
375		0	0.0659026	-0.144928	0.0485282	0.108669	0.00767868	0.0704225	0.0942249	-0.0945776	0.0107607	0.15087	0.0645161	0.00299103	0.0663616	0.175719	0.084124	-0.00110742	0.0795594	0.0255319	-0.16726	0.0371901	1.24125	-0.0692308	0.0275229	0.0124688	0.210604	0.0977995	0.107296	0.68661	0.152971	0.118478	0.320261	-0.0248112	0.65	0.101347	-0.0366492	-0.222973	0.251765	0.172131	0.112094	0.0939908	0.225	0.0212072	0.154291	0.268293	0.190555	0.586207	0.188679
376		-0.0014771	0.0803674	0.111111	0.0604462	0.182342	-0.00584112	-0.0653595	-0.224719	0.0920882	0.0132353	0.150962	0.053021	0.043594	0.121005	0.240464	0.0696517	0.07277	-0.044335	0.0353982	-0.0405904	0.0978184	1.125	-0.0606061	0.0193843	-0.0284653	0.080597	0.0863579	-0.0350877	0.782353	0.152477	0.115596	0.39726	0.114451	0.872897	0.142857	0.0718232	-0.205776	0.115741	0.0387597	0.188906	0.18125	0.2	0.0155102	0.140677	0.276316	0.202268	0.71954	0.239544
377		0.00436681	0.0506108	-0.0397112	0.0122967	0.175796	0.062614	-0.0855263	0.0318841	0.0339623	0.0649739	0.166265	0.0822086	0.0796221	0.0870588	0.127036	0.0591074	0.105856	-0.0420561	0.0155211	-0.114504	0.0866477	1.24696	-0.138943	0.070615	0.0761155	0.181269	0.0216346	-0.0350877	0.90462	0.164093	0.11542	0.190789	0.014756	0.828467	0.0605428	-0.138462	-0.112676	0.0428894	0.196721	0.162142	0.167183	0.29558	0.000802568	0.24165	0.452555	0.198495	0.591928	0.136691
378		0.0424597	0.0790698	-0.0786106	0.0141956	0.17411	0.0568807	0.00958466	-0.134328	0.110236	0.0339173	-0.0377003	0.10049	0.0623509	0.0801887	0.281713	0.00252525	0.132701	0.108312	0.0154525	-0.0792453	0.153127	1.22965	0	0.0345622	0.198347	0.293939	0.0707317	-0.154185	1.01493	0.16108	0.116019	0.308176	0.0955711	0.787004	0.0521862	0.157895	-0.134752	0.0265487	-0.0876494	0.136499	0.0897833	0.19726	0.00744417	0.123512	0.50173	0.205154	0.643653	0.138686
379		-0.0406977	0.0760165	-0.0271248	0.059952	0.212121	0.0862275	-0.073955	-0.00574713	-0.04	0.0166852	0.179191	-0.00247525	0.0100604	0.138095	0.298701	-0.0018622	0.155193	-0.0506024	-0.00431034	-0.0671642	0.0616246	0.92607	-0.177645	0.0845886	0.177596	0.150074	0.0387409	0.0803571	0.80826	0.114015	0.158507	0.291391	-0.0112867	0.75419	0.0760563	0.189474	-0.0851064	0.142857	0.015873	0.12	0.175159	0.271967	-0.0660757	0.189831	0.307692	0.17855	0.790524	0.174242
380		0.0664697	0.0514354	-0.0414414	0.00239234	0.0371035	0.0435821	0.10274	-0.150442	0.0878981	0.0110051	0.172205	0.0700637	0.0645712	0.0232019	0.360927	0.0824418	0.0471698	-0.153659	0.08	-0.266187	0.0428571	0.983936	-0.028	-0.0348028	0.24581	0.267776	0.0806846	-0.00444444	1.03216	0.158549	0.108217	0.209003	0.062069	0.7603	0.0500352	0.149171	-0.207547	0.189448	0.10084	0.0713246	0.130827	0.313559	-0.0205423	0.244875	0.530303	0.181882	0.776722	0.333333
381		0.0298507	0.0470518	-0.0691589	0.0748576	0.143984	0.0256716	0.0511945	0.00906344	0.0194049	-0.0357942	0.128703	0.130653	0.0623729	0.113953	0.269421	0.0867052	0.0278707	0.0159902	0.150812	-0.309091	0.0968198	1.18182	-0.160494	0.0357143	0.153527	0.287671	0.0904459	0.0900901	0.778774	0.229797	0.112005	0.05625	-0.0182857	0.831461	0.0467963	-0.0449438	-0.169118	0.231481	0.254386	0.0453216	0.165891	0.369714	0.0713392	0.148549	0.489655	0.144273	0.554585	0.0875233
382		0.0432191	0.107208	-0.0462107	0.00570033	0.145363	0.0579797	-0.0769231	-0.00884956	0	0.0244453	0.163135	-0.0595533	0.0584262	0.169632	0.254457	0.0770725	0.00796359	-0.125452	0.0112108	-0.191011	0.0961115	0.824701	0.0244399	0.067757	0.0980392	0.234837	0.093633	0.0305677	0.637143	0.189672	0.105296	0.365854	-0.029148	0.865421	0.0708661	0.333333	-0.213287	0.110024	0.122363	0.0662739	0.1	0.262873	0.0266445	0.159664	0.430556	0.205183	0.814181	0.287054
383		0	0.121718	-0.0448833	0.0502471	0.160668	0.0414129	-0.041958	-0.0690691	0.095057	0.00677711	0.145978	0.0268199	0.070364	0.11007	0.227425	0.0786082	-0.02746	-0.015	0.0609481	-0.141791	0	1.13849	-0.14876	0.0690476	0.108635	0.135303	0.0505051	0.0185185	0.799414	0.20995	0.0592186	0.0787879	-0.0331429	0.759398	0.149963	-0.0558376	-0.129151	0.0900243	0.180328	0.0152284	0.247344	0.302069	-0.011466	0.154154	0.531599	0.176529	0.788991	0.183206
384		-0.0739645	0.0720562	-0.079646	0.0486618	0.0302656	0.0299043	0.0711864	-0.0231214	0.0522293	0.00075358	0.0553936	0.0477387	0.0794408	0.0971564	0.226209	0.00509554	0.0365998	-0.0498753	-0.0438596	-0.117871	0.065704	1.05179	-0.104938	0.0974729	0.0889193	0.350158	0.103797	0.137615	0.979856	0.180723	0.159365	0.270358	0.00563698	0.903704	0.0924731	0.1875	-0.267658	0.283293	0.190083	0.128127	0.137195	0.310719	-0.0206729	0.139742	0.289199	0.200613	0.722353	0.162617
385		-0.0812408	0.0702894	-0.0393996	0.066555	0.175694	0.0173965	-0.0342466	0.0641026	-0.0217114	-0.0488355	0.123562	0.0783055	0.0107455	0.0884041	0.359477	0.0771259	0.041958	-0.00738916	-0.039823	-0.0851064	0.0892086	1.15918	-0.107143	0.0360885	0.112619	0.199396	0.11	-0.137931	0.755008	0.107188	0.150359	0.369492	0.115165	0.849541	0.0705036	0.352273	-0.184669	0.0983213	0.148594	0.107143	0.0534125	0.204885	-0.0304778	0.170011	0.439716	0.201041	0.850679	0.137037
386		-0.0314843	0.0657109	-0.00974659	0.031906	-0.0168224	0.0042605	-0.0315789	-0.120482	-0.014157	-0.0149483	0.0199203	0	0.0637394	0.151659	0.311793	0.0916887	0.0400943	-0.0708075	0.16129	0.044898	0.0541311	1.18029	-0.180124	0.14578	0.102493	0.28481	-0.0211706	-0.111111	0.708018	0.140918	0.163997	0.318033	0.0343249	0.872659	0.138707	0.113772	-0.0647482	0.288557	0.190083	0.0958303	0.060423	0.267218	-0.00295983	0.177778	0.434483	0.181912	0.535047	0.161049
387		-0.0233918	0.0869565	-0.11985	0.0674897	0.199731	-0.0438001	-0.0671141	-0.0276923	0.0169051	-0.0132325	0.0324165	-0.036855	-0.00171762	0.12093	0.387097	0.00131579	0.075846	0.0855683	0.0207852	-0.180077	0.0893372	0.967146	-0.199179	0.0725995	0.168813	0.251156	0.0696517	-0.0300429	0.613095	0.148469	0.122851	0.335548	0.0665111	0.961977	0.0863309	0.184358	-0.028777	0.376289	0.126531	0.0833333	0.179081	0.238636	-0.018711	0.170732	0.377163	0.214943	0.613208	0.259259
388		-0.0973451	0.10628	-0.0534351	0.091747	0.233425	-0.0121803	0.0459364	-0.22619	-0.00515464	0.0139255	-0.147159	0.0721649	-0.0166837	0.0402844	0.3267	0.0862641	0.0642857	-0.0167742	0.172577	-0.0344828	0.0867052	1.28694	-0.0595483	0.116395	0.165957	0.313291	0.0440252	0.0267857	0.733737	0.165386	0.135944	0.413793	-0.0262857	1.05426	0.0950292	0.314607	-0.0534351	0.164619	0.163793	0.100592	0.136578	0.299169	-0.00659522	0.16692	0.484099	0.232209	0.849515	0.306358
389		-0.0293663	0.110976	-0.0892532	0.0284536	0.178645	0.0238824	-0.0263158	-0.0447761	-0.0315789	0.0045283	0.0772421	0.138381	0.00281294	0.0261661	0.191824	0.178191	-0.00362757	-0.116105	0.0412844	-0.109375	0.0541516	1.13445	-0.0935551	0.0726392	-0.0123796	0.232836	0.0633894	-0.0859729	0.802432	0.16694	0.0970626	0.202658	0.0406504	1.09785	0.123596	0.247191	-0.0449827	0.273183	0.223629	0.104294	0.204509	0.242857	0.0312236	0.206186	0.602941	0.198704	0.657471	0.149254
390		-0.0229008	0.132515	-0.0638298	0.0606571	0.190476	-0.015873	0.178571	-0.0416667	-0.0513834	-0.00425861	0.147808	0.0988447	-0.0505676	0.0632911	0.356436	0.114116	-0.00477327	-0.0559796	-0.0921659	-0.0570342	0.163341	0.904573	-0.125523	0.0929095	0.112022	0.267776	0.0460772	-0.018018	0.910847	0.193429	0.124208	0.356164	-0.024447	1.00765	-0.00438596	0.175824	-0.164835	0.255102	0.139013	0.103236	0.179739	0.388967	0.0342173	0.187268	0.274725	0.246052	0.909548	0.093633
391		0.0258752	0.0891089	-0.0988593	0.0674061	0.147235	0.0554505	-0.155844	-0.0322581	0.0128535	-0.00230415	0.126732	0.070529	-0.0017343	0.0660377	0.441781	-0.0887306	0.0666667	0.025	0.0572082	0.0418251	0.188253	0.953782	-0.0935551	0.00591716	0.124309	0.129032	0.0351759	0.058296	0.707463	0.158281	0.146641	0.376271	0.144175	1.02682	0.060276	0.017341	-0.241135	0.236453	0.0743802	0.0781011	0.140187	0.316788	0.0510638	0.102628	0.406593	0.235092	0.567686	0.316505
392		0.0588235	0.0263158	0.0322581	0.0718186	0.223082	0.0482509	-0.00332226	-0.0931677	-0.0220493	0.00115875	0.0721248	0.0371287	-0.0186292	0.0952955	0.325806	0.109508	0.0294464	0.0245796	0.180095	0.153226	0.0427729	1.1453	-0.0698152	0.0453461	0.179558	0.255521	0.0600255	0.135135	0.797872	0.163576	0.0825864	0.337662	0.122007	0.98482	0.0662782	-0.027027	-0.0769231	0.287879	0.160173	0.0809992	0.178947	0.15415	0.0350727	0.137695	0.372414	0.253985	0.76247	0.301527
393		0.0674663	0.111249	0.0684932	0.0635789	0.191864	0.00561447	0.0947368	-0.180516	0.0415094	0.0358535	0.031	0.0633894	0.0632124	0.0767414	0.222734	-0.0574713	0.0170316	-0.0290038	0.0540541	-0.167286	0.0390567	1.0082	-0.0472279	0.0904585	0.198006	0.21327	0.066838	0.0577778	0.87988	0.15493	0.183246	0.471831	0.100121	0.939623	0.0846715	0.237569	-0.201413	0.197044	0.245614	0.132771	0.0757342	0.259669	0.0147617	0.191808	0.532075	0.182623	0.789474	0.277247
394		0.0172144	0.047443	-0.0585938	0.0697272	0.167693	0.0289944	0.0113208	0.0841121	0.00397351	0.0715132	0.124051	0.0883483	0.0820368	0.198573	0.251248	-0.0550875	0.0245098	0.0336788	0.187067	0.0703125	0.0842491	0.957983	-0.0686071	0.0643127	0.0984743	0.0497076	-0.22287	-0.0599078	1.10843	0.12953	0.164436	0.245033	-0.00346021	1.07031	0.116244	0.168539	-0.205776	0.105134	0.2	0.118012	0.153846	0.29235	-0.0129436	0.191511	0.52	0.234805	0.717703	0.2
395		-0.00453858	0.0838396	-0.0421456	0.089667	0.120747	0.0191713	-0.0313589	0.00946372	-0.00257732	-0.00754268	0.15589	0.118557	0.0565233	0.0780142	0.433278	0.0311878	-0.030303	-0.0670038	0.144828	-0.0823529	0.0798817	1.22128	0.0083682	0.0739394	0.181818	0.198767	0.0376884	0.0442478	1.02769	0.111037	0.194462	0.255521	0.0405562	0.92029	0.108128	0.296703	-0.213793	0.0742574	0.0886076	0.147641	0.133758	0.293296	0.0265411	0.108422	0.229682	0.205485	0.880597	0.224335
396		-0.00630915	-0.0745533	-0.0885122	0.0853503	0.218579	0.0399501	0.0735294	-0.025641	0.003861	0.0176817	0.122397	0.001287	-0.0116238	0.00921659	0.299663	0.0898649	0.0456227	-0.0325945	0.119438	0.0671937	0.0993279	0.874739	-0.0368852	0.100121	0.238364	0.134969	0.0998668	0.203791	0.680233	0.127756	0.130576	0.505455	-0.169143	0.863971	0.0612245	0.0804598	-0.259786	0.109453	0.288288	0.170393	0.225908	0.312067	-0.0413646	0.137313	0.201342	0.206249	0.563549	0.197674
397		0.00463679	0.0382166	0.0203327	0.0724258	0.233402	0.0139241	0.0103093	-0.00625	-0.0416141	-0.0561107	0.132323	0.0448878	-0.0324586	0.157005	0.262267	0.0330858	0.11138	-0.0390625	0.0115473	0.00763359	-0.00654545	1.13537	-0.158	0.13325	0.173104	0.282714	0.12963	0.0941704	1.05405	0.137036	0.144775	0.357377	0.0429594	0.900185	0.102564	0.037037	-0.126354	0.296758	0.221719	0.142636	0.0880989	0.260504	0.00382166	0.163627	0.428571	0.183447	0.81491	0.177331
398		-0.0471842	0.0592639	-0.0754352	0.0147441	0.201361	0.0188206	0.037037	-0.0712074	0.0569106	-0.0023511	0.0548148	0.0643127	-0.00562193	0.0317274	0.338843	-0.0792723	0.0359712	-0.0806045	0.0858469	0.0202429	0.141985	0.859213	-0.132075	-0.103129	0.0958512	0.326923	0.00769231	0.16895	0.815385	0.137942	0.142027	0.445205	0.0358382	0.893333	0.107784	-0.0169492	-0.189781	0.353383	0.176991	0.0328998	0.202593	0.324675	-0.0117944	0.123526	0.566176	0.197375	0.638554	0.210117
399		0.0998464	0.0555895	-0.152542	0.0926407	0.167116	0.0469543	0.056338	-0.191489	0.00380228	-0.0564578	0.11659	0.0623377	-0.0323039	0.110846	0.347682	-0.0907903	0	0.0568475	0	-0.0606061	0.0553064	0.995643	-0.0942623	0.0814815	0.0141643	0.281399	0.148825	0	0.972973	0.133244	0.103003	0.531034	0.0293083	1.09486	0.012715	0.238636	-0.140794	0.181141	0.173913	0.120913	0.129338	0.297222	0.0578654	0.146465	0.448529	0.219078	0.740385	0.23221
400		0.0612903	0.064127	-0.00603622	0.141732	0.0514323	0.00562852	0.00361011	-0.100917	-0.00789474	-0.0587771	0.149485	0.158879	0.00611291	0.129496	0.260274	0.064111	-0.0338983	-0.0503979	0.126761	-0.0472441	0.0460377	0.995798	-0.0553191	0.045067	0.0069541	0.257053	0.156085	-0.0516432	0.746032	0.0973099	0.0994528	0.594306	0.0318627	1.36214	0.0917095	0.011236	-0.14717	0.318296	0.0172414	0.152038	0.270833	0.312763	-0.00473934	0.167498	0.429658	0.199156	0.817259	0.218391
401		0.0730159	0.00997506	-0.0956175	0.0866071	0.208451	-0.0379117	-0.0184502	-0.111111	-0.0106383	-0.0401284	0.00301508	-0.0184957	-0.0308023	0.127711	0.340102	0.0376238	-0.00375469	-0.0484694	0.2	0.1875	0.101341	0.878151	-0.0493562	-0.0157576	0.138187	0.27044	0.0801577	-0.0454545	0.97349	0.14077	0.142672	0.448505	-0.0581395	1.028	0.0848214	0.0449438	-0.281481	0.25641	0.025641	0.2016	0.217532	0.341108	-0.0125162	0.209851	0.457143	0.244315	0.77724	0.244186
402		0.086743	0.0747782	0.0335306	0.0898204	0.220798	0.0367144	0	0.00890208	-0.00934579	0.00596896	0.0883249	0.0680628	-0.02524	0.0616687	0.357639	-0.0108108	-0.088968	-0.0390625	0.176471	0.047619	0.0740464	1.0907	-0.123932	0.108808	0.266355	0.257143	0.0801577	0	1.02406	0.190771	0.112544	0.493056	0.028103	1.26772	0.05	0.222222	-0.189394	0.313984	0.2	0.121832	0.180763	0.368876	0.0112263	0.157315	0.314879	0.231369	0.958937	0.329389
403		0.0526316	0.00439975	0.0753564	0.0626102	0.0133779	0.0673643	-0.344828	-0.054878	0.119681	-0.0374204	0.117324	0.0537084	0.02693	0.135714	0.345161	0.00403769	0.0983397	-0.0225166	0.0895522	0.229508	0.152959	1.24107	0.102564	0.0475	0.055788	0.33758	0.0822281	-0.0610329	0.743976	0.138356	0.151715	0.381443	0.0437956	1.10778	0.0552995	0.229814	-0.2	0.319588	0.136752	0.118827	0.136508	0.34957	0.00306078	0.187696	0.360294	0.222673	0.56338	0.234127
404		-0.0641628	0.0269255	0.0361446	0.100487	0.0326616	-0.0334988	0.0378788	0.0245399	0.136045	-0.00832342	0.15827	-0.0522293	0.0485156	0.0510083	0.292763	-0.061197	-0.00372671	0.00531915	0.126437	0.131783	0.0635401	1	-0.0539957	0.0490566	0.157001	0.339683	0.074359	-0.165877	0.941985	0.10604	0.0767748	0.440273	0.0492197	0.940631	0.11639	0.163636	-0.0214286	0.331579	0.21267	0.106551	0.210084	0.299451	0.0395029	0.131056	0.330882	0.180651	1.00515	0.207171
405		0.022293	0.0488269	-0.00598802	0.0700473	0.247706	0.0184831	0.0931174	-0.0420712	0.0622407	0.0394469	0.16219	0.122078	0.100775	0.104651	0.40813	0.0116279	0.0169903	-0.00789474	0.121076	0.0827068	-0.0297177	1.02123	-0.0130435	0.112485	0.0529328	0.289389	0.124324	0.350785	0.818731	0.11545	0.138524	0.512195	0.0588235	1.02335	0.14264	0.101604	-0.178182	0.260204	0.162996	0.172303	0.268781	0.351585	0.0322581	0.170782	0.305019	0.199958	0.671498	0.360947
406		-0.0189873	0.0579987	-0.00396825	0.0917874	0.127018	0.0299554	0.0703125	-0.00628931	0.0469799	0.0113452	0.113694	0.103979	-0.0206995	0.114428	0.476923	0.0155827	-0.0296296	-0.00840336	0.0430622	0.0645161	0.00148368	0.952484	-0.0447761	0.117871	0.147929	0.263328	0.0291777	-0.228571	0.905199	0.088033	0.100936	0.328814	0.0251497	0.992032	0.0906298	0.222222	-0.30855	0.227053	0.153846	0.0526316	0.192869	0.127223	0.0380952	0.168094	0.44697	0.197646	0.712984	0.259109
407		-0.0491284	0.038632	0.0886598	0.122915	0.0887491	0.00252845	0.209125	-0.0546624	-0.0586701	-0.065481	0.196484	0.0815789	-0.0389703	0.0562347	0.30782	-0.0479406	-0.0170316	-0.0455764	0.148837	0.0350195	0.0564885	1.22171	0.0531178	0.116481	0.178125	0.327869	0.0514139	0.13615	0.930645	0.140541	0.131076	0.450172	-0.00481928	1.15444	0.141998	0.347594	-0.0894942	0.39604	0.0909091	0.146283	0.118421	0.339181	-0.00518135	0.213946	0.496124	0.226314	0.872941	0.183333
408		0.0444444	0.0641849	0.0785124	0.107826	0.0983264	0.0522918	0.1	-0.0632911	-0.0378378	-0.0297907	0.221627	0.128205	-0.0217159	0.121951	0.241852	0.0465273	0.0698254	-0.0213904	-0.0183486	-0.117647	-0.00532319	0.740586	-0.237991	0.0373599	0.132075	0.234727	0.048	0.10101	0.853125	0.18412	0.131219	0.326733	-0.0059312	1	0.0874525	0.0949721	-0.143885	0.230769	0.230088	0.0759494	0.20517	0.521994	0.0447243	0.135417	0.452471	0.204603	0.704225	0.259109
409		0.0976	0.0636195	0.032	0.130704	0.158917	0.0237028	-0.0984848	-0.0599369	-0.0173333	-0.0254751	0.129864	0.0168612	0.0280374	0.135593	0.41913	0.0697674	0.00997506	-0.0921228	0.219048	-0.168627	0.0679758	1.21267	-0.133909	0.0619469	0.160237	0.278481	0.0417227	0.105769	0.93517	0.104005	0.139317	0.402778	0.122195	1.21158	0.0546816	0.0930233	-0.158273	0.292929	0.0841121	0.125729	0.206239	0.254676	-0.00524017	0.125	0.352313	0.206289	0.663594	0.357724
410		-0.0366826	0.0108488	-0.0493097	0.0434028	0.185754	0.0356911	0.0656371	-0.0355987	0.0234483	-0.00530396	0.160546	0.0427807	0.0219459	0.113376	0.404181	0.0561331	0.0788804	0.0069541	0.294964	0.0714286	0.0764479	1.03563	-0.165605	-0.0176545	0.0658858	0.37987	0.0333778	-0.0918919	1.1732	0.130524	0.215496	0.33101	0.0855019	1.27917	0.127443	0.129412	-0.0122449	0.370558	0.0521739	0.144715	0.1712	0.298999	0.00617284	0.137113	0.333333	0.141886	0.855721	0.130604
411		0.00961538	-0.0153257	-0.0215264	0.102727	0.141443	-0.0523627	0.0505837	-0.00338983	0.0661041	-0.0499391	0.143595	0.0723514	-0.0224182	0.084788	0.497382	-0.0498615	-0.138232	-0.0578735	0.0613208	0.027668	0.0308166	1.02232	-0.0336134	0	0.105812	0.275693	0.0200267	-0.044335	0.818331	0.209367	0.166553	0.340351	-0.0684597	1.26772	0.134467	0.0285714	-0.130742	0.215	0.00478469	0.103448	0.138662	0.366279	-0.0108085	0.217625	0.191176	0.151195	0.819512	0.199195
412		-0.0160256	-0.00946372	0.0403226	0.16781	0.156932	0.0045425	-0.134545	0.0539683	-0.094086	-0.00742574	0.126094	0.136786	-0.0332481	0.0405904	0.418244	0.0260173	-0.0562347	-0.0478796	0.243619	0.0452675	0.0432767	1.09211	-0.233624	0.0313676	0.155556	0.319008	0.0504775	-0.0460829	0.849684	0.129523	0.222072	0.245902	0.00360144	1.36473	0.115385	0.374233	-0.0842491	0.311392	0.121076	0.168665	0.0958466	0.374111	0.0253497	0.15914	0.414449	0.194154	0.691943	0.263374
413		0.00490998	0.037037	-0.101215	0.0786517	0.114894	0.0365935	-0.0901961	0.0245614	0.0136986	0.00977995	0.160981	-0.0598958	-0.00994475	0.0946602	0.318718	0.0791667	-0.0126263	-0.0228188	0.0605327	0.00421941	0.0735178	1.06222	-0.0747253	-0.0605327	0.113497	0.37931	0.127572	0.0434783	0.910569	0.17639	0.152371	0.433447	0.00363636	1.20523	0.153423	0.168539	0.0078125	0.129114	0.219048	0.136549	0.193825	0.247863	0.00740741	0.113557	0.470817	0.207083	0.745763	0.228283
414		0.0301109	0.0496454	-0.105263	0.0698299	0.204396	0.0839895	-0.0342205	-0.0590062	0.0258621	-0.0226617	0.166845	0.178046	-0.0678211	0.100985	0.501742	-0.0458333	-0.0539523	-0.0726552	0.0424528	0.0572687	0.0691531	1.049	-0.221978	0.026253	0.204368	0.383117	0.0572207	-0.184466	0.805732	0.090847	0.11336	0.689046	-0.0911271	1.29528	0.0800915	0.0674157	-0.136364	0.436031	0.0497738	0.0564578	0.226027	0.397059	-0.0319432	0.127119	0.492537	0.180824	0.710723	0.130435
415		0.00316456	-0.0446429	-0.129225	0.114299	0.133621	0.00693132	-0.0501931	0	-0.0499287	0.0185567	0.0758974	0.0488771	0.0182224	0.0814249	0.450088	-0.120924	0.0704225	-0.0222841	0.147783	0.198312	0.15456	1.00428	-0.264151	0.0671835	0.208524	0.309446	0.104816	0.0761905	0.758065	0.131449	0.134801	0.700348	0.0414201	1.16183	0.141971	0.119565	-0.0888889	0.27	0.127854	0.213703	0.152709	0.232759	0.0358705	0.185897	0.384615	0.191952	0.911917	0.306554
416		-0.0599676	-0.104302	-0.0718686	0.103825	0.222939	0.11317	-0.0394265	-0.086262	0.0986301	0.0471892	0.0798956	0.0552632	-0.0154525	0.0716981	0.221498	0.018043	-0.0234858	0.00965517	0.204244	0.269076	0.0393822	0.652561	-0.058296	0.0966123	0.0670641	0.346341	0.0743338	0.0738916	0.765079	0.104762	0.0961145	0.294118	-0.122353	1.192	0.123267	0.191011	-0.144981	0.353591	0.32093	0.123114	0.199313	0.316642	0.016919	0.192816	0.252669	0.194203	0.907692	0.286013
417		-0.00489396	-0.0381579	-0.0179641	0.102743	0.0878963	-0.0366972	-0.298893	0.0176678	0.117994	0.0426065	0.148847	0.103634	-0.029985	0.100127	0.424191	0.00979021	0.0382653	-0.0402219	0.203931	0.124464	0.0826833	1.16895	0.0402542	0.0177215	0.136024	0.37037	0.0938338	-0.118812	0.760064	0.182043	0.148325	0.585034	0.121099	1.28392	0.0742496	0.26506	-0.130769	0.368159	0.121951	0.138564	0.261383	0.361765	0.0229479	0.144987	0.651515	0.177616	0.926829	0.22
418		-0.0807453	-0.059126	-0.0860656	0.123585	0.0509165	-0.02685	0.112903	-0.0460526	0.0595065	0.0562552	0.218966	0.0324254	-0.0172985	0.158028	0.538462	0.141631	-0.123905	-0.0504775	0.179856	0.0671937	0.0283465	1.07889	0.0215983	0.047619	0.152695	0.358974	0.0607735	0.186275	0.948247	0.102906	0.170914	0.463918	0.0433705	1.29158	0.135975	0.236994	0.0116732	0.315927	0.13242	0.162675	0.172757	0.548287	-0.00484795	0.201193	0.545817	0.231177	1.13684	0.240938
419		-0.0935961	0.0143791	-0.022869	0.0919017	0.103746	-0.0457516	-0.266187	-0.105263	0.128427	0.0275689	0.142708	0.00655308	0.0063742	0.0861423	0.516892	-0.00774103	-0.0127877	-0.0313779	0.194175	0.185185	0.0328125	1.15982	-0.148148	-0.00524934	0.068314	0.26979	0.105485	0.120419	0.825119	0.140351	0.0969473	0.570934	0.0685279	1.37895	0.1	0.230769	-0.128571	0.29771	0.246377	0.118755	0.204013	0.320359	-0.0310284	0.158171	0.396226	0.202018	0.822335	0.0736434
420		-0.0497592	-0.177665	-0.01002	0.150284	0.156364	-0.0213316	-0.223881	0.0413793	0.133531	0.0415467	0.115724	0.124829	-0.0446194	-0.0619684	0.473684	-0.0391753	-0.11772	-0.0218579	0.369727	-0.04	0.038073	1.24828	-0.203426	0.0481013	0.174652	0.410802	0.0743802	0.040404	0.587662	0.147005	0.152414	0.664336	0.0880196	1.07083	0.1856	0.18239	-0.0592593	0.418478	-0.0186916	0.217896	0.200653	0.278873	0.0130337	0.0726141	0.400722	0.183704	0.956204	0.432314
421		-0.0819672	0.0725594	0.118998	0.108209	0.0516899	0.0684932	0.196787	0.00680272	-0.0504202	-0.0504719	0.155556	0.0904255	-0.0130354	0.153342	0.470882	-0.0846995	-0.0218228	-0.0227273	0.159204	0.0283401	0.0902022	0.944444	-0.16044	-0.0441558	0.0617978	0.422581	0.0695771	0.030303	0.821151	0.0716292	0.0957592	0.690141	0.0549451	1.30705	0.123719	0.252874	0.0151515	0.365239	0.0655022	0.12571	0.248748	0.341142	0.0896861	0.160986	0.301471	0.184865	0.925	0.228145
422		-0.0555556	0.0242305	0.0666667	0.102214	0.106803	0.0343933	0.101562	-0.0133333	0.0851371	0.00764656	0.159569	0.162162	-0.0637509	0.130779	0.422067	0.029078	-0.0453956	0.0469613	0	-0.015748	0.0830671	1.17143	-0.121413	0.148387	0.102102	0.355049	0.0916784	-0.0283019	0.886035	0.0996491	0.157143	0.462783	0.0622711	1.45	0.145123	0.230769	-0.111969	0.341584	0.192982	0.0851064	0.235392	0.292754	0.0450857	0.106053	0.40239	0.188746	1.15176	0.467249
423		-0.0677419	0.0494652	-0.0272537	0.0912512	0.0556701	-0.0124264	0.0578512	-0.0457516	-0.0444763	-0.00841751	0.111111	0.295977	-0.00224719	0.115578	0.483536	-0.0708772	-0.175727	-0.0169014	0.21256	-0.2	0.0430697	1.02237	0.0249433	0.00500626	0.202435	0.58714	-0.0376569	0.0134529	0.658065	0.0275035	0.153374	0.621429	0.0661673	1.37687	0.0995261	0.45098	-0.222222	0.238579	0.427184	0.0885246	0.220911	0.384384	0.0548753	0.150862	0.263941	0.161913	1	0.417879
424		-0.0500808	0.0580475	0.0535332	0.0720974	0.0441472	-0.0249201	0.0522088	-0.0666667	0.0698366	0.0636132	-0.142154	0.150761	-0.0273141	0.0260223	0.461676	-0.065024	-0.146125	0.0348675	0.353086	0.0472103	0.0816641	1.11348	-0.0941704	-0.042362	0.167173	0.316294	0.0589849	-0.062201	0.652597	0.159155	0.123427	0.446367	-0.0986602	1.47537	0.17817	0.3	-0.153846	0.25	0.24	0.149671	0.176871	0.286127	0.0356164	0.154126	0.533898	0.17402	0.886139	0.392781
425		-0.106796	0.0557065	0.0309278	0.0981115	0.0734694	-0.0162866	0.103734	-0.0688525	0.0678466	0.0328209	0.0703043	0.130552	-0.0106061	0.0227848	0.501779	0.0486601	-0.059126	0.0438472	0.212264	0.167347	0.0534469	0.936073	-0.159664	-0.0064433	-0.00847458	0.342373	0.0950355	0.135678	0.873964	0.160338	0.136899	0.525773	0.0620347	1.68261	0.154705	0.0229885	-0.117871	0.235897	0.211268	0.2103	0.300699	0.282486	0.151053	0.193376	0.148014	0.177246	0.871921	0.347193
426		0.0714286	0.0252324	-0.00618557	0.0858227	0.188873	0.0237942	0.0564516	-0.103448	0.0509461	-0.00377675	0.0271934	0.121884	0.00912548	0.0988447	0.427598	-0.0622348	-0.0847458	-0.0125523	0.356784	0.118644	0.11202	1.09217	-0.0416667	0.0564103	0.132653	0.29085	-0.00842697	0	0.674757	0.0900141	0.0472074	0.642586	0.0503778	1.49362	0.12126	0.24359	-0.222615	0.373684	0.255814	0.055235	0.175292	0.347432	0.0772769	0.191546	0.377432	0.123571	0.969309	0.26556
427		-0.00983607	0.0152419	0.11879	0.101005	0.114306	-0.0162866	0.092437	0.0600707	0.131098	0.0274841	0.15572	0.0788043	-0.00723258	0.0769231	0.545126	-0.0525588	-0.0580808	0.0194444	0.267813	-0.060241	0.103068	0.859091	-0.245455	0.0581395	0.175038	0.314476	0.109244	0.0251256	0.663399	0.114834	0.120164	0.725191	0.0255786	1.47158	0.11271	0.05	-0.258427	0.445333	0.12381	0.101307	0.21815	0.627119	0.0562303	0.093831	0.632	0.197884	1.04092	0.469979
428		-0.123994	-0.0442708	0.0785563	0.136732	0.138187	0.00260756	0.232653	-0.0666667	0.0222883	-0.0177665	0.145263	0.208451	-0.0909091	0.0702427	0.476667	-0.0220955	-0.0825921	-0.0578512	0.367901	-0.0197628	0.0413355	1.24594	-0.249433	0.0302267	0.203675	0.496599	0.147727	0.0351759	0.782895	0.0845217	0.14405	0.556338	0.0356234	1.53878	0.122186	0.26506	0.0487805	0.395722	0.283582	0.0737365	0.110368	0.517751	0.0748175	0.159655	0.567797	0.186949	1.21446	0.360691
429		-0.0248756	0.0427119	0.081761	0.0537229	0.0862069	-0.014906	0.249012	-0.0551724	-0.0628571	0.0557006	0.145281	0.129288	-0.0515231	0.0372272	0.423671	0.0408602	-0.0446194	0.0138889	0.262338	0.175	0.0407524	1.03196	-0.184855	0.033419	0.174699	0.442017	0.00689655	0.122995	0.651163	0.124553	0.115977	0.687273	0.0239596	1.58091	0.15366	0.454545	0.0461538	0.427807	-0.0776256	0.116162	0.187166	0.323263	0.0815956	0.15772	0.235521	0.202079	1	0.220202
430		-0.0327869	0.00932091	0.0605428	0.112866	0.115328	0.0337382	0.28	-0.150327	-0.0791367	0.0294243	0.135974	0.168901	-0.0598355	0.0359897	0.650685	0.0706134	-0.078534	0.00837989	0.223301	0.158333	0.000809717	1.01395	-0.10177	0.0952381	0.18138	0.358429	0.0896359	-0.0344828	0.605178	0.0939691	0.12605	0.751825	0.14578	1.57267	0.121643	0.225	-0.103175	0.43662	0.216981	0.14958	0.191851	0.403875	0.0632911	0.114224	0.396947	0.183423	1.14062	0.515695
431		-0.00660066	0.013459	-0.100642	0.0939279	0.172156	-0.0420712	0.230769	-0.1	0.0155587	0.0280687	0.0901379	0.0690122	-0.0255639	0.1491	0.503356	-0.100996	-0.113134	0.0512821	0.25	0.342466	0.0666667	0.927107	-0.0426966	0.0904325	0.160305	0.334416	0.180516	-0.237209	0.803333	0.0658263	0.101784	0.821561	0.132903	1.60684	0.138846	0.320513	-0.0775194	0.284946	0.475728	0.0980392	0.265517	0.346445	0.0295858	0.159711	0.521569	0.18701	0.974619	0.376623
432		0.00505902	-0.0330688	0.0307018	0.0757504	0.147612	-0.0319218	-0.0281124	0.0342466	-0.0112994	0.0846878	0.102972	0.081225	-0.0258162	0.159794	0.730496	0.11544	0.0592885	0.0101892	0.157385	0.00826446	0.0409357	1.10824	-0.104575	0.037037	0.190332	0.335484	0.104816	0.140097	0.644068	0.0987395	0.147219	0.765957	0.0485679	1.55556	0.148118	-0.00584795	-0.166667	0.446927	0.0322581	0.180824	0.240336	0.551459	0.0810811	0.198778	0.365079	0.193212	1.08458	0.470716
433		-0.0466667	0.0107962	0.00865801	0.152299	0.137255	-0.0619296	-0.0165289	-0.0337838	-0.102672	0.0537172	-0.0400416	0.0707351	0.0266101	0.0314465	0.427562	0.0295421	-0.0647292	-0.130186	0.376884	0.153846	0.048414	0.903382	-0.165179	0.047619	0.0682853	0.459829	0.108225	-0.0755556	0.5936	0.184029	0.157706	0.787234	0.106329	1.78205	0.199679	0.207317	-0.11284	0.197917	0.110092	0.142373	0.1019	0.460218	0.0939781	0.129244	0.561983	0.179883	1.14583	0.42616
434		0.0551724	0.0403769	0.0021978	0.125479	0.146216	-0.0167224	0.0938776	0.0138889	0.0217707	0.0493934	0.147122	0.1266	-0.071701	0.17047	0.66782	0.111444	-0.00937082	0.0217707	0.340102	-0.0603448	0.038526	0.985612	-0.0683371	0.0779392	0.226837	0.375839	0.121602	-0.0190476	0.747508	0.19835	0.17982	0.726937	0.0363864	1.45396	0.103734	0.475177	-0.15748	0.244094	0.454545	0.192923	0.11775	0.517028	0.00502513	0.127753	0.386555	0.191024	1.15979	0.536481
435		-0.00857633	0.0920081	0.0309278	0.0607631	0.130752	-0.0390987	0	-0.11032	-0.0964029	0.00173913	0.134328	0.198251	-0.0491054	0.0649351	0.596667	0.0637363	0.0171278	0.0056338	0.475	-0.0483871	0.0852321	1.02709	-0.00659341	-0.0226131	0.0803571	0.395973	0.119424	0.0582011	0.583333	0.173188	0.136888	0.593985	0.014157	1.72421	0.142403	0.294872	-0.181818	0.293194	0.528205	0.0153102	0.259897	0.369066	0.149197	0.161667	0.472	0.177925	1.18231	0.349138
436		-0.0639731	0.0378527	0.189189	0.0885836	0.196347	0.0467914	0.113821	-0.197232	0.0342857	0.0501526	0.175947	0.0903955	0.0282443	0.0142303	0.484429	0.0525547	0.0600801	-0.0284091	0.480106	0.0521739	0.0331675	0.918552	-0.0377358	0.0790191	0.108397	0.394649	0.245665	-0.0338164	0.690789	0.173193	0.152748	0.529412	0.0114068	1.31897	0.120968	0.473684	-0.160305	0.300275	0.373134	0.207612	0.136519	0.545455	0.0811567	0.140323	0.308333	0.226721	1.21106	0.273469
437		0.0661896	0.082257	0.108696	0.108921	0.281811	0.0769231	0.0622407	-0.0206897	0.139818	0.0795455	0.0891967	0.0972973	-0.0218978	0.140645	0.451827	0.127273	-0.078534	-0.0640114	0.628499	0.14876	0.0438449	1.07727	-0.201285	0.00403769	0.104566	0.490265	0.206395	-0.0456853	0.694118	0.113952	0.199271	0.85159	0.0421456	1.60169	0.10628	0.134146	-0.236434	0.271768	0.392157	0.168403	0.0644068	0.303597	0.0875706	0.116757	0.323077	0.194377	1.43081	0.512088
438		-0.089983	-0.0213941	0.187215	0.142857	0.167551	0.128484	-0.0650407	-0.0567376	0.0117647	0.0475775	0.109983	0.014885	0.00627451	0.11413	0.63	-0.148095	0.0278146	-0.0387374	0.411765	0.235556	-0.0333605	1	0.0339806	-0.00520156	0.131376	0.366609	0.106557	0.0490196	0.788779	0.18597	0.14835	0.914062	-0.0129534	1.8578	0.192086	0.316456	-0.176955	0.289973	0.315217	0.0521008	0.269565	0.263909	0.0238532	0.115104	0.546218	0.195652	1.32877	0.409978
439		-0.129296	0.0839695	0.113537	0.106383	0.0456245	0.0197628	0.0330579	-0.049505	0.0959302	0.0592304	0.147191	0.163636	0.00740741	0.145527	0.470687	0.0268256	-0.00393185	-0.130186	0.39899	0	0.0235581	0.939954	-0.15625	0.0383091	0.0089955	0.477509	0.118741	0.029703	0.553018	0.17042	0.123248	0.448763	0.0362954	1.73563	0.154163	0.585714	-0.121569	0.389474	0.366834	0.209139	0.149385	0.419255	0.134579	0.173197	0.634043	0.226887	1.12169	0.410309
440		-0.0405405	0.0238908	0.0945946	0.103279	0.113481	0.0393487	0.13913	-0.0547945	-0.0147493	0.0496949	0.0758163	0.0733057	-0.0425697	0.171875	0.621053	0.0555155	-0.0557029	-0.112717	0.425743	0.0588235	0.0123457	0.81068	-0.0330189	0.0552486	0.132911	0.400341	0.116959	0	0.712855	0.113125	0.167814	0.772894	0.0325098	1.6287	0.150573	0.25	-0.262745	0.0904393	0.295238	0.132713	0.213172	0.525	0.0989416	0.219955	0.855932	0.227356	1.14016	0.380753
441		-0.0320405	-0.0286885	-0.0498915	0.0687251	0.103604	-0.00729927	-0.205993	-0.0921986	-0.017341	0.0323144	0.191634	0.247024	-0.0426949	0.07393	0.679012	0.0847201	0.0497981	-0.176136	0.395225	0.0336134	0.0408497	0.803653	-0.0637813	-0.00802139	0.176101	0.421927	0.217134	-0.0253807	0.8157	0.194362	0.139809	0.880597	0.0441558	1.75264	0.144518	-0.0375	-0.116466	0.422096	0.359606	0.105943	0.227513	0.411043	0.023732	0.164659	0.481172	0.229886	1.06107	0.44186
442		-0.0859107	0.0326975	0.240275	0.0972424	0.0736994	0	0.339286	-0.0666667	-0.00440529	0.0674357	0.138479	0.0775623	-0.0216718	0.0904325	0.530275	0.0487805	-0.00797872	-0.0329341	0.437186	-0.0588235	0.0720795	0.726415	-0.0754717	0.0690608	0.241935	0.427609	0.173021	0.129032	0.629508	0.101238	0.152371	0.498208	0.0464241	1.85135	0.207327	0.204969	-0.159184	0.327824	0.171717	0.194371	0.181347	0.352201	0.0415896	0.178755	0.621849	0.18306	1.04639	0.449462
443		-0.110368	0.0565517	-0.0775862	0.116481	0.0941438	-0.0691906	-0.148148	-0.0275862	0.0261628	0.0627208	0.102793	0.0853147	-0.022763	0.0653009	0.751332	-0.038864	-0.0147256	-0.0934844	0.288557	-0.025	0.0166113	0.943794	-0.115741	-0.094086	0.2	0.473862	0.108225	0.0736842	0.847896	0.201959	0.156954	0.765125	0.0154242	1.66523	0.19702	0.456954	-0.0564516	0.464789	0.4	0.129472	0.235189	0.391691	0.10079	0.209932	0.559055	0.200136	1.20519	0.301927
444		-0.0186757	0.0993746	0.0953437	0.0658742	0.0577778	-0.0696118	0.168142	-0.0785714	0.0377907	0.0671378	0.174785	0.137026	-0.0427283	0.0395778	0.505085	0.127547	-0.0695187	-0.0798258	0.497462	0.112069	0.0540541	1.05251	0.112195	0.0381895	0.169329	0.488774	0.0224719	0.0309278	0.668376	0.112681	0.125557	0.619048	0.0176101	2.07907	0.240506	0.202381	-0.267717	0.428571	0.425743	0.251318	0.23775	0.314112	0.0474383	0.19482	0.383966	0.177904	1.11671	0.51828
445		-0.0875421	0.027894	0.0044843	0.0957816	0.134284	-0.00464499	-0.131783	-0.10274	0.0171429	0.0642119	0.111235	0.177143	-0.0273051	-0.0387597	0.754513	-0.0229358	-0.0078329	-0.0263158	0.291457	0.142857	0.0771841	0.920375	-0.147577	0.138418	0.0560748	0.431507	0.149425	-0.05	0.653595	0.13037	0.0759266	0.684982	0.0699482	1.85393	0.192923	0.303797	-0.0826446	0.372881	0.31	0.187446	0.124542	0.421687	0.0204271	0.115959	0.530364	0.202409	1.33156	0.473002
446		0.0574324	0.0833333	0.0318182	0.115573	0.123476	-0.027759	-0.0336134	-0.147651	0.0193741	0.0813008	0.164368	0.203343	0.0154701	0.0460705	0.68306	0.00225056	0.121884	-0.104294	0.274463	0.0672646	0.0328007	1.08019	0.14787	0.12605	0.106583	0.530686	0.1261	0.138298	0.723906	0.157425	0.128186	0.723636	-0.0063857	2.12381	0.165979	0.0649351	-0.15102	0.202156	0.416216	0.147084	0.169675	0.432061	0.0163475	0.150384	0.42616	0.175274	1.12903	0.505568
447		-0.0300885	0.0158511	0.0218341	0.0929773	0.102919	-0.186486	-0.138462	0.114187	-0.146628	0.0875617	0.0775281	0.0583215	-0.0452578	0.0519126	0.744917	-0.0499266	0.0450205	-0.00151286	0.229219	0.0214592	0.139435	1.06747	-0.0921659	0.11326	0.164228	0.401709	0.179259	0	0.528428	0.134251	0.0742075	0.575972	-0.0431373	1.79271	0.221658	0.448718	-0.0564516	0.346705	0.382353	0.11092	0.277677	0.511592	0.0482955	0.242873	0.582609	0.17892	1.12234	0.5
448		0.0262697	0.101813	0.0720721	0.0778384	0.114329	-0.065508	0.284483	-0.0208333	-0.0153374	0.0701439	0.164111	0.0932203	-0.00741898	0.11326	0.695575	0.0743194	-0.0107527	-0.114074	0.496021	-0.112	0.090604	1.02871	-0.04	0.00140647	0.231018	0.246978	0.0832117	0.168317	0.852487	0.138211	0.139492	0.650909	0.0865513	1.79476	0.238579	0.350649	-0.188525	0.441989	0.221154	0.185056	0.144852	0.287671	0.0582662	0.230769	0.516949	0.204749	1.19035	0.448276
449		0.133449	0.0971831	-0.1	0.0604423	0.0712711	-0.0790378	0.0956522	-0.0647482	-0.0336391	0.0640036	0.173864	0.0877193	-0.0256205	0.0769231	0.642361	0.00982615	-0.112882	-0.0118343	0.191919	0.0973451	0.102389	0.888889	0.0634146	0.0433566	-0.0379939	0.469027	0.230543	0.12	0.711806	0.170841	0.0722242	0.690566	0.0965147	2.08372	0.162049	0.211268	-0.131148	0.285347	0.309645	0.198261	0.220217	0.589172	0.0491343	0.151169	0.376	0.232007	1.28238	0.544643
450		0.0451389	0.0840108	0.0359408	0.10727	0.23065	-0.0593047	0.0173913	-0.0242215	0.0745342	-0.00358102	0.199548	0.188873	-0.0152856	0.101877	0.804702	0.00913242	-0.0666667	-0.0491803	0.43299	0.235294	0.012766	0.985185	0.056872	0.0141044	0.0320611	0.366337	0.141159	0.0824742	0.855379	0.251524	0.153401	0.94697	0.10567	2.20642	0.191987	0.21519	-0.269962	0.391304	0.457447	0.123144	0.00341297	0.465046	0.0422535	0.173088	0.50211	0.209526	1.3378	0.510112
451		-0.0346021	0.0464789	-0.018018	0.0883674	0.147745	-0.0196344	0.313559	-0.0955882	0.0840841	0.0490601	0.175478	0.204142	-0.0395525	0.139378	0.664921	0.060816	0.032967	0.0487805	0.455959	0.137778	0.0229008	0.907543	-0.0327869	0.0932203	0.153968	0.451327	0.269051	0.131868	1.11364	0.204704	0.111601	0.828358	0.0187166	2.01389	0.230901	0.347222	-0.155039	0.398281	0.580488	0.0831146	0.21223	0.472222	0.0336972	0.143343	0.423729	0.221807	1.33143	0.627494
452		0.00530973	0.0307263	0.0574713	0.0807517	0.148805	-0.0342466	-0.234818	-0.0954064	0.0416025	0.0488688	0.12766	0.0453258	0.0116139	-0.0732357	0.863309	0.0220868	-0.0530612	-0.0153374	0.555556	0.105263	0.0500439	0.726651	-0.0769231	0.0340909	0.17032	0.491833	0.164933	-0.0625	1.85382	0.161266	0.108861	1	0.106667	1.97436	0.156277	0.428571	-0.324786	0.30659	0.419689	0.208029	0.222816	0.529791	0.0421348	0.0898813	0.461847	0.199072	1.15176	0.597285
453		-0.0164534	0.0104676	-0.132479	0.107489	0.0779923	-0.0736984	0.142857	-0.0108303	0.0656716	0.0820724	0.151104	0.201149	0.0149737	0.0783784	0.808725	-0.0275808	0.0328767	-0.157738	0.440415	0.166667	0.0398614	1.00488	-0.164384	-0.0196629	0.297762	0.425606	0.110119	0.325581	1.55644	0.163867	0.0716085	0.856061	0.123179	2.0303	0.0890924	0.52518	-0.175	0.420613	0.373737	0.126095	0.278388	0.457364	0.0632672	0.118795	0.167347	0.169	1.44041	0.514894
454		-0.0104895	-0.0321678	-0.0111857	0.143147	0.116883	-0.0422056	0.211009	-0.152542	0.00150376	0.0384789	0.164527	0.142446	-0.0394894	0.0461957	0.701439	0.0938486	-0.0781671	-0.0537634	0.393316	0.229358	0.0615785	0.842365	-0.0791367	0.047482	0.194585	0.562617	0.269646	0.230769	1.46493	0.159116	0.0957798	0.382353	0.076716	2.29439	0.234842	0.0440252	-0.182979	0.231638	0.182796	0.137778	0.182143	0.35474	0.0676908	0.10676	0.383333	0.210508	1.32402	0.724771
455		-0.0300885	0.0261854	0.0964706	0.0983189	-0.0381451	-0.00141044	0.127119	-0.020979	0.0660793	0.0182648	0.142369	0.132768	-0.0334543	0.0836653	0.660839	0.0167939	-0.00278552	-0.0364742	0.489691	0.0567686	0.0603229	0.955882	-0.0306604	0.0893617	0.101498	0.405975	0.275495	0.102041	1.88353	0.151469	0.145381	0.661654	0.042471	1.90222	0.158442	0.358491	-0.27572	0.350427	0.380711	0.111688	0.237077	0.310976	0.0469417	0.109702	0.372385	0.142534	1.36723	0.554084
456		-0.00362319	0.0514447	0.0552995	-0.0119403	0.0704225	-0.0379213	-0.124514	-0.128571	-0.0717423	0.0513291	0.17344	0.0687237	-0.0187144	0.104022	0.729915	-0.037037	0.0192837	-0.00149477	0.370277	-0.0272727	0.0541958	0.848411	-0.0930788	0.0924609	0.13871	0.478571	0.181409	0.145946	1.77205	0.162183	0.122202	0.748092	0.0241287	2.02935	0.212585	0.656716	-0.105691	0.539773	0.255814	0.225748	0.248639	0.314554	0.0964136	0.08646	0.644068	0.161402	1.35191	0.578261
457		-0.0216606	0.11588	-0.0480549	0.0644512	0.135135	-0.0315638	0.127119	-0.129496	-0.0668693	0.0276243	0.094423	0.110783	0.00880705	0.10221	0.661922	0.0131885	-0.11831	0.0283019	0.591512	0.078341	0.0530822	1	-0.145786	-0.0899183	0.247863	0.409949	0.244776	0.163842	1.49827	0.173579	0.0904449	0.584229	0.00131062	1.92617	0.206512	0.306122	-0.209677	0.514286	0.125	0.148047	0.225577	0.301973	0.0876362	0.165556	0.360656	0.164845	1.43713	0.551867
458		-0.0446735	0.132427	-0.106667	0.137014	0.0809595	0.0515988	-0.105882	0	0.0605613	0.0395948	0.130926	0.0882353	0.00358423	0.044898	0.780822	-0.0375767	0.0598053	-0.0200927	0.328205	0.0901288	0.0720562	1.0049	-0.0457831	0.0644258	0.0923318	0.496454	0.0549133	0.135417	1.61565	0.131872	0.11021	0.745455	0.145161	2.06787	0.240243	0.171053	-0.0364372	0.273224	0.316327	0.101064	0.210811	0.43937	0.101589	0.117919	0.692308	0.176821	1.12174	0.680365
459		0.0157068	0.128571	-0.00225734	0.0897243	0.180451	-0.0132939	0.272727	-0.185455	0.0713154	0.046875	0.150372	0.181009	0.00325998	0.114799	0.818505	0.0572549	-0.059322	-0.0168453	0.44591	0.258216	0.094306	0.905707	-0.0376471	0.0348675	0.105691	0.450777	0.167883	0.152542	1.50172	0.198595	0.127786	0.773723	0.079235	1.9618	0.222128	0.542857	-0.215385	0.0637119	0.336957	0.193202	0.261029	0.478807	0.0821585	0.182864	0.508333	0.193402	1.26347	0.686364
460		0.0510949	0.156433	0.0593607	0.109638	0.0216028	-0.00944081	0.295154	0.0141844	0.0276074	0.0303588	0.200237	0.126844	0.0291498	0.128276	0.876364	0.0086546	-0.00852273	-0.095679	0.46594	0.105991	0.0723104	0.90172	-0.095	0.123404	0.0734824	0.419689	0.229814	-0.0854271	2	0.138846	0.0181549	1.17073	0.0326975	2.10502	0.191379	0.175758	-0.0292887	0.459941	0.466667	0.155357	0.102941	0.458937	0.0334928	0.0852273	0.628099	0.184183	1.16279	0.581818
461		0.0353818	0.0850608	0.0765661	0.0363269	0.18419	-0.0284464	0.0393013	0.0972763	-0.0289193	0.0402562	0.204861	0.184049	0.0235008	0.0155148	0.757785	0.00538876	0.0405797	0.0140845	0.490814	0.140271	0.0637168	0.928741	-0.113208	0.0995671	0.0304976	0.5	0.084058	0.187166	1.64111	0.186725	0.0152505	0.583643	0.0405405	1.83294	0.167235	0.0985915	-0.139241	0.321937	0.473118	0.130594	0.274809	0.590323	0.108017	0.193457	0.327935	0.185496	1.23053	0.731207
462		0.0467938	0.0826087	-0.0110865	0.069697	0.0210603	-0.0788504	0.2	0.0981818	-0.102041	0.053211	0.227082	0.135693	0.0511779	0.0278552	0.881701	-0.0483619	-0.00691563	0.01875	0.505435	0.0619469	0.0841284	1.03457	-0.110577	0.0457143	0.29078	0.451613	0.207715	0.318919	1.64167	0.127501	0.0812408	0.539007	-0.00134953	2.46096	0.243945	0.369863	-0.152838	0.286517	0.565217	0.12	0.151631	0.369208	0.0478469	0.106139	0.567568	0.13235	1.77492	0.537778
463		0.0185185	0.120473	0.107981	0.106515	0.0702541	-0.0118871	-0.304167	-0.0452962	0.0110935	0.0563445	0.135447	0.175595	-0.0113914	0.0150479	0.86372	-0.0936037	-0.134615	-0.00632911	0.426357	0.045045	0.100089	0.851485	-0.281106	0.0396601	0.0913621	0.488029	0.208589	0.0227273	1.54484	0.143297	0.01748	0.855072	0.0448549	2.35392	0.199298	0.135484	-0.17094	0.545171	0.420455	0.165455	0.221135	0.456628	0.0226944	0.144253	0.506383	0.178126	1.27564	0.583149
464		-0.0530165	0.119708	0.0535714	0.121752	0.00513573	-0.0140637	0.242718	-0.0507246	0.109005	-0.0277264	0.0761364	0.123457	-0.021501	-0.0220994	0.940035	-0.00233645	0.0784044	-0.148545	0.524324	0.131579	0.136042	0.941606	-0.0780142	0.0984308	0.118421	0.585047	0.183857	-0.180851	1.45754	0.188717	0.0383912	0.462898	-0.127604	2.07407	0.212803	-0.171598	-0.0878661	0.417143	0.534392	0.171533	0.0974729	0.374194	0.0365449	0.187063	0.568966	0.165581	1.47561	0.716814
465		-0.0546737	0.13229	0.078341	0.113508	0.0547845	-0.0541728	0.057377	-0.0184502	-0.0458136	0.0560445	0.1319	0.231726	-0.0139459	0.144444	0.903571	0.0265418	0.0995671	-0.0198473	0.471795	-0.00892857	0.0567057	0.968831	-0.133333	-0.0571827	0.227119	0.632727	0.231726	0.0957447	1.5	0.192447	0.0743194	0.793893	-0.122995	2.3382	0.26072	0.306667	-0.230769	0.596386	0.47027	0.15506	0.219963	0.411585	0.0552027	0.179251	0.45	0.231544	1.36578	0.776286
466		-0.0143885	-0.0191898	0.00947867	0.0942408	-0.0766341	-0.0486726	0.384615	-0.165517	0.0681115	0.0641086	0.13164	0.0804249	0.012752	0.0379747	0.852487	0.10315	-0.0583215	-0.130568	0.556728	0.0566038	0.102334	1	-0.21729	0.029703	0.166052	0.534296	0.288401	0.302083	0.962766	0.210004	0.0548246	0.700375	0.0241935	1.71628	0.253264	0.514286	-0.125541	0.368732	0.15736	0.187384	0.275053	0.38835	0.00094518	0.179306	0.779817	0.189923	1.31511	0.760181
467		0.0204082	0.0472041	0.0428571	0.130068	0.142857	-0.115931	-0.0701754	-0.0798479	-0.0694006	0.0176909	0.162544	0.19697	0.00206526	0.100141	0.810036	-0.0351562	-0.0994318	-0.185535	0.5	0.0616114	0.0247788	0.77887	-0.156177	0.0432277	0.0779436	0.52963	0.295031	0.132275	1.4515	0.116206	0.0593912	0.992308	0.0295359	1.97738	0.224779	0.27027	-0.12069	0.426087	0.405128	0.205405	0.10536	0.401254	0.0159497	0.172414	0.448889	0.180147	1.42282	0.538117
468		-0.0582011	0.0511696	0.0297483	0.197466	0.00446761	0.0318283	0.25	-0.0590406	-0.00634921	0.0133333	0.130708	0.221875	0.00666667	0.0857143	0.692042	0.00990099	-0.0611664	-0.00460829	0.540984	0.32093	0.0139616	0.989276	-0.245192	0.195783	0.221601	0.523979	0.29393	0.0160428	0.846831	0.196825	0.0434137	0.781132	0.0844063	1.99252	0.285714	0.432836	-0.07173	0.421203	0.333333	0.214747	0.455782	0.48539	0.0546158	0.103488	0.54185	0.175312	1.31579	0.814286
469		0.003663	-0.0323024	0.0841584	0.12021	0.141353	-0.0718563	-0.352697	-0.0921986	0.00625	-0.0110294	0.154578	0.212598	0.0481328	0.135447	0.912892	0.0889064	-0.00569801	-0.05	0.628809	0.144186	0.0958409	0.920424	-0.0317073	0.0532374	0.179572	0.483186	0.304075	0.127907	0.62565	0.143191	0.0141973	1.06818	0.0916553	2.07801	0.165633	0.790323	-0.17094	0.408696	0.0466321	0.209472	0.291339	0.561375	0.0635614	0.209891	0.297521	0.181213	1.17284	0.802752
470		0.0356473	0.0417582	0.055814	0.175906	0.0880952	0.101295	0.107981	-0.108772	0.0396197	-0.0184843	0.137209	0.214397	0.0145409	0.130682	0.858407	-0.00696056	-0.0288184	-0.00782473	0.632	0.0943396	0.0936396	0.854922	-0.116223	0.111446	0.253731	0.524324	0.234646	0.271739	0.916058	0.130504	0.0881815	0.725352	0.0502793	1.92991	0.146048	0.407895	-0.256198	0.464286	0.372973	0.124888	0.489177	0.530378	0.0394929	0.0152629	0.433476	0.212389	1.36556	0.639723
471		0.0533808	0.00291121	0.0825243	0.0850077	0.0199852	0.0775076	0.0917431	-0.181159	0.156398	0.00093633	0.113968	0.216741	0.0450375	0.00558659	0.876761	0.0196386	0.010279	-0.123418	0.577836	0.0909091	0.1055	1.13882	0.0146699	0.0307263	0.00643087	0.55036	0.0948678	0.0322581	1.16968	0.211461	0.0886551	0.865169	0.118132	2.21675	0.184735	0.38806	-0.206897	0.25816	0.274725	0.206233	0.0994371	0.670103	0.0580709	0.141827	0.557522	0.164234	1.64984	0.669725
472		0.0218182	0.0114778	-0.0236967	0.0921256	0.0935583	0.0202551	-0.179487	-0.0150376	0.0319489	0.00463822	0.113143	0.198052	0.0422064	0.0644719	0.686341	0.153657	-0.0659026	-0.0358814	0.418667	0.172414	0.161804	0.94	-0.130841	0.0214592	0.155635	0.627057	0.166667	0.210526	0.667832	0.174591	0.0822762	0.766423	-0.0564516	2.23039	0.165633	0.230769	-0.135802	0.307918	0.488889	0.190783	0.307692	0.4272	0.0774684	0.116667	0.513514	0.132922	1.50968	0.694761
473		0.104364	0.0345324	0.0623441	0.109833	0.161031	0.0948678	-0.157895	-0.0327273	0.181675	0.00837989	0.136954	0.237082	0.0177759	0.0396601	0.891892	0.0887529	0.0274964	-0.0529595	0.556757	-0.242291	0.127042	0.80303	-0.114634	0.0827286	0.0746269	0.425494	0.18125	0.025641	1.06852	0.184025	0.0748995	0.667925	0.0422535	2.26442	0.307692	0.248322	-0.101695	0.416185	0.484536	0.121212	0.0627306	0.620168	0.0958498	0.116092	0.51073	0.14342	1.44481	0.744875
474		-0.0334572	0.0555957	0.175904	0.129877	-0.0322823	0.118098	-0.324895	-0.0234375	0	0.0267229	0.148549	0.227787	0.0368818	0.114706	0.965217	0.0670827	0.00872093	0.00961538	0.497326	0.144231	0.0496324	0.989362	-0.238095	0	0.259615	0.654545	0.0450161	-0.00578035	0.872302	0.0984819	0.0762963	0.892308	0.15625	2.11058	0.245217	0.5	-0.0973451	0.446429	0.302083	0.120939	0.167382	0.225505	0.0552514	0.173445	0.330544	0.159967	1.44518	0.702882
475		0.115596	0.0143266	0.145631	0.101279	0.0652341	0.1	0.363636	0.0861423	0.0181818	0.0353274	0.0819304	0.169036	0.0240265	0.129412	0.841727	0.182405	0.0208955	-0.07109	0.629834	0.136364	0.0681004	0.97416	-0.118644	0.0969609	0.158416	0.501792	0.188768	0.217877	0.903052	0.159164	0.0767511	0.881423	0.101124	2.44039	0.167104	0.333333	-0.128631	0.41954	0.538462	0.179063	0.329502	0.631399	0.0719352	0.133134	0.497835	0.158811	1.7585	0.590414
476		0.0719424	0.0477569	0.0780856	0.134264	-0.0306199	0.0459683	0.114155	-0.101045	0.036566	0.0480307	0.125882	0.260586	0.0399663	0.0436047	0.882759	0.0854839	-0.068917	-0.14554	0.314578	0.0934579	0.049151	0.97449	-0.159314	0.0267062	0.139665	0.611722	0.219048	-0.139896	0.741935	0.116117	0.0764595	0.607547	-0.0212766	2.21154	0.174216	0.387755	-0.128889	0.415205	0.14	0.22377	0.344468	0.336493	0.0424788	0.175031	0.462555	0.16696	1.41695	0.531323
477		0.0258303	0.0465116	0.044335	0.170652	0.091354	0.0863095	-0.263158	-0.138462	-0.037037	0.0155881	0.196229	0.285714	0.0062474	0.164671	0.989637	0.111024	0.0483163	-0.0299213	0.710306	0.280788	0.133641	0.93617	-0.198091	0.00902256	0.249135	0.657692	0.224556	0.0594595	1.2359	0.166734	0.0973978	0.635688	0.0896159	2.37824	0.242806	0.544118	-0.208333	0.556923	0.178378	0.190037	0.280443	0.418417	0.080916	0.150148	0.678899	0.175849	1.58194	0.703704
478		0.0539568	0.0868925	0.0372208	0.133333	-0.151673	0.138806	0.2	-0.0486891	0.077686	-0.00611765	0.0695249	0.273016	0.084399	0.0125174	1.07273	-0.096519	0.00145138	-0.0838509	0.622535	0.114155	0.0894161	0.803526	-0.14554	0.0590015	0.215328	0.608286	0.236593	0.0653266	0.73638	0.15566	0.0508475	0.774319	-0.0273973	2.12981	0.207447	0.377778	-0.0661157	0.385507	-0.0276498	0.193047	0.470199	0.480769	0.0440376	0.134045	0.581967	0.177147	1.26284	0.61987
479		0.0509804	0.101707	-0.0292683	0.124056	0.0316265	0.0537802	0.148148	0.179688	0.0273752	-0.0374883	0.145258	0.246795	0.0175879	-0.00852273	1	0.0617384	-0.0121951	-0.194401	0.529412	0.147059	0.063129	0.968668	-0.1247	0.116766	0.173611	0.707865	0.204969	0.0235294	0.860714	0.108376	0.0321361	0.760618	0.0280899	2.35369	0.299083	0.602941	-0.243478	0.554896	0.314917	0.1415	0.285988	0.531773	0.0594109	0.117821	0.502262	0.184719	1.70345	0.670481
480		0.0857143	0.0352941	-0.00966184	0.139586	0.0562154	0.00960828	-0.0967742	-0.173432	0.0397351	-0.0649597	0.100233	0.19544	-0.00420168	0.0504202	1.08178	0.0773616	-0.0481752	-0.132137	0.710456	0.246512	0.12334	0.811705	-0.219858	0.0688623	0.343511	0.736549	0.170418	-0.0456853	0.817869	0.145205	0.101792	0.765152	-0.0968622	1.8776	0.281818	0.829787	-0.131915	0.412121	0.486339	0.218369	0.466513	0.503205	0.037	0.13658	0.486486	0.175026	1.57605	0.814286
481		-0.0518234	0.113887	-0.0507614	0.183471	0.106518	0.0757342	-0.266932	-0.0692308	0.0212766	0.0144231	0.107802	0.196774	0.0236427	0.108187	0.798942	0.089914	0.0353982	-0.18555	0.445652	0.109005	0.0990654	0.934509	-0.217822	0.0254873	0.154098	0.591985	0.247588	0.264368	0.768041	0.156128	0.0707998	0.908397	0.0811594	2.39713	0.251356	0.162162	-0.174468	0.410714	0.336735	0.296154	0.29771	0.466443	0.0905371	0.182847	0.387931	0.158528	1.37838	0.949309
482		0.0211132	0.048048	0.103448	0.0992869	0.16019	0.0590875	0.336735	-0.0867925	0.0184255	0.0310442	0.110169	0.242718	-0.020202	0.098966	0.859712	0.00312989	0.0686567	0.0114192	0.519337	0.21	0.0909091	0.978495	0.072	-0.0149701	0.364839	0.60367	0.141935	0.390805	0.625	0.157515	0.0295813	1.20243	0.0257143	2.15962	0.3213	0.343066	-0.0990991	0.481481	0.0710383	0.202639	0.334669	0.565359	0.0849202	0.157125	0.64977	0.14821	1.40514	0.819861
483		-0.093633	0.0320656	0.0151515	0.154311	0.0847458	0.0993177	0.229268	0.135338	0.0721311	0.0299228	0.178703	0.369775	-0.0503356	0.10365	0.971781	0.102326	-0.0504451	0.0187394	0.656338	0.145455	0.0500472	0.800487	-0.0603015	0.0702541	0.0782313	0.524862	0.234375	0.132275	0.873857	0.165072	0.0658683	1.01527	-0.0129125	2.07426	0.273224	0.636364	-0.224138	0.489362	0.347368	0.116323	0.25	0.370861	-0.00349476	0.183082	0.490909	0.115678	1.62925	0.832558
484		-0.0463822	0.0804249	0.0686275	0.155779	0.0841346	0.121951	0.24878	-0.197133	0.00996678	0.0545991	0.121713	0.170178	0.025729	0.100149	0.774955	0.00478469	-0.00925926	0.0605565	0.794872	0.232227	0.113636	0.6781	-0.0152284	0.130303	0.0808081	0.748527	0.191558	0.418182	0.808394	0.138277	0.0669728	0.858333	0.0906516	2.13801	0.35376	0.616	-0.283333	0.69697	0.340541	0.155172	0.352941	0.578773	0.0348004	0.110978	0.407725	0.192208	1.44918	0.995181
485		0.0287908	0.01059	0.124378	0.129805	0.118072	0.137193	0.235294	-0.00392157	0.041876	0.0222652	0.105137	0.225705	0.0426985	0.0330935	0.794425	0.0284322	-0.00149477	-0.112179	0.597734	0.207547	0.113422	0.84022	0.0659631	0.0948678	0.0398671	0.444853	0.177419	0.202381	0.683673	0.0853323	0.113164	0.673152	0.0557185	2.53616	0.310592	0.756522	-0.0648148	0.0773481	0.195876	0.219697	0.220472	0.559727	0.033	0.152057	0.616822	0.140369	1.7491	0.724771
486		0.0116732	-0.0038373	0.0363196	0.116796	0.0398126	0.183188	0.188406	-0.0119522	-0.114007	0.0560472	0.145411	0.309033	-0.0569728	0.0558824	0.829181	0.0392943	0.0455927	-0.00961538	0.671388	0.153846	0.070159	0.720317	-0.0959596	0.0692771	0.23913	0.660305	0.279743	0.159091	0.897436	0.0872483	0.0565611	0.836735	-0.061693	2.16256	0.240254	0.458647	-0.254237	0.541284	0.2	0.161169	0.269231	0.62585	-0.00101317	0.134183	0.401639	0.15797	1.68056	0.615213
487		-0.00192678	-0.0265353	0.00483092	0.0382096	0.08636	0.213037	-0.181034	0.0403226	-0.0449251	0.0246496	0.149626	0.423208	0.0181511	0.114659	0.970425	0.0673077	0.0268657	-0.0410509	0.658683	0.139896	-0.0224618	0.712895	-0.236181	0.0830769	0.137255	0.735568	0.270315	0.27381	0.649186	0.0591505	0.039907	0.813008	-0.0321637	2.10837	0.326697	0.537313	-0.132743	0.620795	0.272727	0.211429	0.409449	0.63	-0.000520021	0.137126	0.440329	0.182578	1.72131	0.861607
488		0.0943396	0.0689655	0.0588235	0.136888	0.0252101	0.0508732	0.336842	0.024	-0.0101351	0.041273	0.133292	0.157212	0.0100671	0.0383481	0.947552	0.0171875	0.0845921	-0.0612245	0.626437	0.0599078	0.0283554	0.804627	-0.0385604	0.0646617	0.0758621	0.640927	0.113565	0.0568182	0.643382	0.0971611	0.0602687	0.726908	-0.0310192	2.14988	0.344891	0.577236	-0.0990991	0.570997	0.153846	0.184825	0.390782	0.510604	0.0223805	0.15783	0.193277	0.195169	1.74172	0.940503
489		0.0833333	0.0375375	-0.0325815	0.0357143	0.0693687	0.00537634	-0.150215	-0.0861423	0.0682594	-0.00346706	0.142857	0.257235	0.048552	0.0558824	1.01733	0.0331754	-0.0261628	-0.0245499	0.636856	0.24	0.0566388	0.773196	-0.273632	0.118182	0.143836	0.798479	0.215947	0.371429	0.749559	0.121336	0.0294118	0.704	-0.0679887	2.27047	0.375691	0.694444	-0.0683761	0.280702	0.202186	0.195402	0.317919	0.616725	0.0390016	0.185369	0.479821	0.167361	1.36656	0.906103
490		0.0992063	-0.0137405	-0.0279898	0.0729226	0.0522214	0.160097	0.18	0.0583942	0.01	-0.0230279	0.115727	0.234727	0.0836268	-0.00740741	0.934596	0.120264	0.00787402	-0.0533118	0.76435	0.192488	0.0837989	1.00556	-0.0078329	0.107544	0.146912	0.896414	0.27907	0.305882	0.928839	0.146517	0.101801	0.934694	0.0739645	2.46506	0.254144	0.333333	-0.00847458	0.665635	0.445087	0.216972	0.443763	0.565068	-0.00914634	0.194067	0.413333	0.174911	1.32215	0.888889
491		0.00772201	-0.0286576	0.0636132	0.123443	-0.0449173	0.00930233	-0.021645	-0.0898876	0.0301003	0.0145073	0.0793083	0.286385	0.0200698	0.160237	1.01757	-0.0340909	0.0218069	-0.0146341	0.720548	0.25	0.095057	0.773196	0.0181818	0.142405	0.108333	0.637383	0.185897	-0.0520231	0.787546	0.139554	0.0199846	1.15584	-0.0567164	2.03597	0.306085	0.609023	-0.118943	0.641509	0.455556	0.116407	0.263366	0.599297	0.0631195	0.151328	0.0650407	0.161142	1.39322	0.747826
492		-0.00775194	0.0209268	-0.131894	0.0889396	0.110741	0.0507937	0.391304	-0.0671937	0.026936	-0.0245821	0.150093	0.317073	0.0215332	0.106061	0.807487	0.0722989	0.0755287	-0.044586	0.486034	0.245098	0.0322581	0.934247	-0.0972973	0.0107858	0.0703259	0.707602	0.206452	0.0162162	0.491651	0.0796603	0.0753923	0.85124	0.0255682	1.81798	0.269054	0.666667	-0.0550459	0.777778	0.44186	0.27343	0.439689	0.533784	0.0189076	0.12201	0.2	0.175527	1.56452	0.887059
493		0.0217822	-0.0417288	-0.04	0.101723	0.109472	0.0953895	0.40404	0	-0.135762	0.00403226	0.16133	0.271829	0.0152413	0.0834598	0.909091	0.0434783	0.0154799	0.0170068	0.590028	0.135678	0.0490287	0.878453	0.0430108	0.04375	0.171171	0.938144	0.351351	0.273885	0.901408	0.0761176	0.0192012	0.816667	0.0961832	2.35696	0.372549	0.426471	-0.192825	0.442815	0.487805	0.166667	0.373984	0.640411	0.025323	0.198204	0.594595	0.135279	1.80153	0.903846
494		-0.0230769	-0.0256024	0.116751	0.0714286	0.196293	0.10086	0.295238	0.0387597	0.0753769	-0.0429744	0.0804322	0.228758	0.0575011	0.0614035	0.93617	-0.0188525	0.107034	-0.211538	0.744444	0.37561	0.0910816	0.799499	0.0706522	-0.0404984	0.188713	0.664804	0.249587	0.224719	0.708029	0.185614	0.062069	0.715481	-0.0614035	2.23585	0.364415	0.605839	-0.112108	0.621118	0.409836	0.1387	0.261719	0.648829	-0.011236	0.186033	0.450644	0.181301	1.96167	1.0281
495		0.023166	0.00152439	0.0102564	0.122006	0.175686	0.0472441	-0.208511	-0.0307692	0.016835	-0.0318841	0.133495	0.163297	0.0332901	-0.0379009	0.914286	0.0289855	0.111111	-0.0746269	0.785714	0.170732	0.0386428	1.01075	0.0822281	0.0260337	0.211268	0.740458	0.27504	0.305389	0.595668	0.132794	0.0904194	0.738095	0.0885341	2.44118	0.340018	0.515625	-0.0982143	0.689552	0.428571	0.192271	0.388	0.52349	-0.0111524	0.19644	0.5	0.179909	1.31419	1.01887
496		-0.126437	0.0452107	0.138381	0.0730337	0.119583	0.13618	-0.150943	-0.105058	-0.0988655	0.0024426	0.133127	0.178344	0.08315	0.0965825	0.984991	0.0769231	0.0362205	0.048414	0.770492	0.303483	0.102515	0.859944	0.0966057	0.0371517	0.199262	0.784736	0.245847	0.345912	0.723247	0.0999595	0.107716	0.819742	0	2.29238	0.337037	0.228571	-0.0454545	0.700306	0.604396	0.134615	0.407258	0.664384	0.00261643	0.124079	0.719457	0.170507	1.61404	0.860577
497		0.0352941	-0.0644678	0.112861	0.100331	0.0023166	0.141015	0.275362	-0.164179	0.0921502	-0.0311727	0.197995	0.196748	0.0147955	0.0537313	0.891798	0.00329761	0.00468019	0.00163666	0.868571	0.209756	0.12054	0.867021	-0.0406504	0.0630915	0.199275	0.707581	0.274247	0.120482	0.870403	0.0762404	0.112346	0.590164	0.0238095	2.17676	0.33957	0.742857	0	0.560241	0.294798	0.161597	0.422397	0.586207	0.0345188	0.167282	0.49345	0.193881	1.67327	0.948357
498		0.032882	-0.0121212	0.078125	0.120592	0.103968	0.141243	0.126904	-0.0373134	-0.013289	-0.0752582	0.185375	0.298188	0.0632359	0.0451807	0.773124	0.0525438	-0.0182371	-0.0510708	0.513514	0.117647	0.112414	0.938547	0.0511364	0.1	0.0824373	0.85259	0.264516	0.123596	0.901887	0.11201	0.0788947	0.792208	-0.0060241	2.30749	0.338843	0.455882	-0.345455	0.489855	0.266667	0.186025	0.377176	0.699659	-0.0203655	0.213665	0.333333	0.187129	1.59333	0.901408
499		0.054902	0.0487805	0.130653	0.179487	0.119804	0.100787	0.55665	-0.0840336	-0.0254669	0.000994036	0.172063	0.345336	0.0964602	0.111111	0.996479	0.0847176	0.0559006	0.0154374	0.882006	0.454545	0.0614634	0.714286	-0.0927835	0.18328	0.113173	0.708253	0.397213	0.0408163	0.815534	0.192308	0.0358255	0.692946	0.012012	2.32663	0.354015	0.639098	-0.107143	0.333333	0.638554	0.119698	0.456	0.449573	0.0175252	0.125076	0.381166	0.162162	1.59498	0.854214
500		0.0151515	0.0384615	0.0127226	0.0546479	0.177083	0.147854	0.233831	-0.141791	-0.0352941	0.0244151	0.0470518	0.39374	0.0585664	0.142429	1.11993	-0.09699	0.0396341	-0.182965	0.8017	0.386139	0.168142	0.777188	-0.19797	-0.100592	0.165714	1.05253	0.293718	0.135135	0.601463	0.109329	0.0398724	0.548387	0.027439	2.28321	0.218265	0.781022	-0.347458	0.607362	0.525424	0.110902	0.42515	0.523156	0.00683851	0.152522	0.413462	0.172092	1.69863	0.83693
501		-0.0198413	-0.0052356	0.0204082	0.0890643	-0.00961538	0.113565	0.225131	-0.128	-0.0123894	0.0280843	0.0874148	0.165846	0.157847	0.111455	0.938628	-0.0945274	0.0377358	0.0853242	0.884726	0.227513	0.111324	0.848315	0.00817439	0.0599369	0.127341	0.819578	0.296928	0.353659	0.71215	0.130472	0.0821256	0.686275	0.0167939	2.27226	0.305164	0.560606	-0.0900901	0.51746	0.147208	0.316052	0.498024	0.635417	-0.0183727	0.0820851	0.492958	0.189337	1.6037	0.922892
502		0.0534653	0.0140625	0.0466321	0.184974	-0.0260736	0.0427892	0.413043	-0.170543	0.0367776	0.00302725	0.1525	0.289256	0.0807899	0.036036	1.02509	0.00859107	0.0351438	0.0100671	0.88764	0.119617	0.137216	0.561497	-0.108696	-0.0325581	0.0144928	0.964981	0.45781	0.0348837	0.731061	0.0903838	0.0971837	0.711934	0.00148588	2.15949	0.291209	0.869565	-0.1	0.747692	0.534091	0.210526	0.316306	0.540816	0.00955414	0.178857	0.288889	0.177044	1.45993	0.970516
503		0.0806452	-0.0773946	0.131367	0.0472973	0.200701	0.127843	0.398964	-0.00769231	0.00863558	-0.006	0.12168	0.247588	0.0311814	0.0771558	0.939286	-0.0635179	0.136437	-0.0830565	0.741935	0.273684	0.13471	0.588391	-0.0434783	0.0757098	0.144465	0.808219	0.3267	0.244186	0.994413	0.0228121	0.0502175	0.557447	-0.029985	2.355	0.335196	0.25	-0.186916	0.667752	0.425287	0.0214425	0.48847	0.686957	-0.0315457	0.185185	0.240741	0.125683	1.5203	0.953162
504		0.0456432	0.0577223	-0.025641	0.124579	0.130435	0.0722311	0.541899	-0.0534979	0.0528109	0.0174359	0.0775916	0.361486	0.0628622	0.0523077	0.837838	0.0102041	0.034375	-0.103215	0.865854	0.138614	0.160396	0.832402	-0.00286533	-0.00316456	0.189493	0.677165	0.325342	0.244444	0.666034	0.117471	0.0870266	0.512605	-0.0389222	2.19898	0.312557	0.813953	-0.207373	0.85567	0.54717	0.210789	0.319672	0.5	0.0551097	0.167393	0.419355	0.154184	1.93796	0.933806
505		0.0522244	0.0660522	0.121693	0.196056	-0.0870994	0.0482213	0.587629	0.0238095	0.0230088	-0.0268924	0.101863	0.311419	0.0740072	0.00149031	0.941075	-0.05	0.0759494	0.0511945	0.895706	0.121951	0.135875	0.724138	-0.112299	0.12126	0.114504	0.773438	0.0912052	0.105882	0.767258	0.153912	0.0907656	0.456067	0.0610329	2.37466	0.393382	0.887097	-0.159292	0.807947	0.63871	0.212661	0.358268	0.542955	0.0403443	0.197816	0.276786	0.131437	1.69776	0.741339
506		0.0685484	0.0451415	-0.03125	0.188073	-0.0873786	0.108065	0.298969	-0.0390625	-0.0537262	-0.0525282	0.142308	0.323232	0.0247191	0.0925645	1.01471	0.0153322	-0.0744849	0	0.796512	0.251282	0.189243	0.79096	0.0939227	0.0727848	-0.0254545	0.804391	0.331104	0.289941	0.801572	0.157537	0.0322841	0.846809	-0.0181269	1.95567	0.325188	0.746269	-0.246637	0.758958	0.520958	0.210421	0.364892	0.640741	0.0242066	0.252218	0.281818	0.134501	1.81955	0.941176
507		0.0208333	0.0698039	0.161644	0.170816	-0.104441	0.108783	0.213592	-0.135802	-0.026178	0.0229709	0.179487	0.291525	0.0615809	0.138973	0.992767	-0.0195578	0.0983607	-0.0398671	0.826866	0.385366	0.13392	0.681319	0.00826446	0.111481	0.179884	0.871212	0.434412	0.303371	0.724528	0.141167	0.0885772	0.514644	-0.0689655	2.23438	0.280357	0.652893	-0.0841121	0.376947	0.66879	0.117761	0.446281	0.584055	0.0719656	0.218405	0.0825688	0.184153	1.47059	1.09524
508		0.00608519	0.00554236	-0.0175439	0.12413	0.108808	0.0925181	0.502825	0.0661479	0.0119658	0.0137405	0.163842	0.232484	0.072807	0.0870968	0.924051	-0.00512821	0.0423453	0.0519031	0.682081	0.20197	0.109768	0.708108	-0.109333	-0.0241546	0.196998	0.776062	0.314879	0.271676	0.647727	0.114583	0.0375151	0.763158	0.015674	2.33509	0.463138	0.622378	-0.0550459	0.868512	0.724138	0.223645	0.451292	0.636364	-0.0155329	0.234043	0.35814	0.179684	1.35521	0.990025
509		0.0886598	-0.0471042	0.112299	0.0832861	0.0151515	0.0614251	0.333333	0.0598291	-0.0325901	0.0108303	0.131096	0.345455	0.0528124	0.109422	1.04211	-0.0272502	0.0109546	-0.101307	0.662791	0.305699	0.0815534	0.820163	0.0245232	-0.122257	0.164122	0.814394	0.337979	0.209877	0.894539	0.0770533	0.046875	0.581967	0.0470219	2.72805	0.292166	0.950413	-0.410714	0.514019	0.418994	0.238485	0.347107	0.606557	0.00214823	0.159275	0.462963	0.165269	1.45033	1.03951
510		0.131148	0.025641	-0.00518135	0.0907017	0.185505	0.0901706	0.673913	-0.208	-0.154499	0.00659564	0.101631	0.210084	0.0622481	0.0857143	0.92976	0.068819	0.076175	-0.0102041	0.678363	0.128205	0.154309	0.736559	-0.218919	0.0512397	0.160448	0.705426	0.346429	0.0987654	0.847015	0.172085	0.0678988	0.442922	-0.0717557	2.51031	0.415326	0.952	-0.181395	0.746224	0.154762	0.178988	0.33996	0.619546	0.0263583	0.241956	0.506977	0.176665	1.75704	0.956627
511		0.05	0.0104083	0.0648649	0.173836	0.195804	0.127796	0.481081	-0.0526316	0.0222985	0.0116692	0.0860077	0.301695	0.0542222	0.0656489	0.938294	0.0041425	0.110749	-0.125	0.58427	0.182692	0.116935	0.813699	0.0382514	0.102389	-0.0573913	0.826962	0.290435	0.261364	0.73913	0.126378	0.0957792	0.653333	-0.00455235	2.66027	0.311355	0.983193	-0.0934579	0.77492	0.559524	0.127127	0.456432	0.599284	0.0623632	0.142502	0.568075	0.147647	1.68512	1.00483
512		0.0258449	0.028169	0.0368421	0.155323	-0.0593804	-0.0360288	0.336842	0.198312	-0.0808081	0.00409836	0.109661	0.384071	0.0357304	0.0621118	0.834179	0.0930034	0.114754	-0.0154374	0.623596	0.260417	0.107143	0.684211	-0.271233	0.0927152	-0.113924	0.860194	0.375439	0.35	0.819923	0.0833682	0.0822259	0.525862	-0.0644678	2.2962	0.390566	0.983607	-0.183486	0.760797	0.514793	0.210369	0.521008	0.661431	-0.00156169	0.271186	0.356828	0.166581	1.45329	1.16471
513		-0.0542636	0.114148	-0.0463918	0.0909091	-0.013289	0.0535714	0.49	-0.0434783	-0.0673401	-0.00623701	0.1569	0.328	-0.00777321	0.0343699	0.568106	0.0500835	0.0779436	0.020979	0.668478	0.127451	0.0674603	0.779661	0.0677966	0.0984975	0.0837989	0.88024	0.451389	0.204678	0.720388	0.0704107	0.083982	0.846847	0.11146	2.34417	0.336484	0.738462	-0.0761905	0.683891	0.54491	0.165306	0.478788	0.555556	-0.0475676	0.229287	0.468468	0.163284	1.5614	1
514		0.0838446	-0.0214797	0.0526316	0.109302	0.0662752	0.0608974	0.521739	-0.0297872	0.0158172	0.0081716	0.0689223	0.195402	-0.0265568	-0.0152905	0.934066	0.0701299	0.12709	-0.0198347	0.815029	0.183486	0.168884	0.831461	-0.0748663	-0.050571	0.135036	0.97551	0.390991	0.372781	0.741617	0.108247	0.0594901	0.4	-0.0630631	2.51351	0.381041	0.83871	-0.192661	0.568254	0.303371	0.18304	0.371769	0.630996	-0.0276123	0.257653	0.303167	0.201764	1.71004	1.30047
515		0.0806452	0.123525	0.0344828	0.189726	0.169844	0.0973017	0.625731	-0.145161	-0.0437828	0.0102775	0.159326	0.250836	0.052729	-0.0219436	0.975904	0.0258118	0.194676	-0.0276817	0.681818	0.333333	0.100304	0.878261	-0.114846	0.0909091	0.190114	0.951904	0.221831	0.2875	0.637066	0.123663	0.0930136	0.757576	0.0471842	2.37845	0.271889	0.578125	-0.122642	0.546269	0.548023	0.229508	0.450902	0.666041	0.0333881	0.199236	0.407407	0.188553	1.83721	1.10628
516		0.114286	0.0380349	0.0702703	0.0532341	0.004095	0.074819	0.489362	-0.177419	-0.00353357	0.0159711	0.148992	0.456053	-0.0611872	0.0172144	0.921288	-0.0351328	0.130709	-0.0352349	0.852761	0.349754	0.151822	0.682451	-0.0308123	-0.0305958	0.0359066	1.01198	0.360825	0.290698	0.806513	0.128051	0.124112	0.621622	-0.0120846	2.3531	0.405959	1.01754	-0.37963	0.76129	0.478788	0.209928	0.484407	0.639229	0.0828305	0.237113	0.462687	0.156329	1.63448	0.962617
517		0.0559006	0.0170593	-0.0529101	0.159882	-0.0547264	0.113253	0.4375	-0.0202429	-0.00519931	0.0475703	0.0564568	0.0978916	0.0367271	-0.0189873	1.04506	0.0463122	0.0407524	-0.0660066	0.836257	0.535354	0.130261	0.74344	-0.230556	-0.0258065	0.105263	1.02123	0.185185	0.260606	0.91	0.171116	0.0122951	0.684685	0.112179	2.57303	0.384615	0.644068	-0.18894	0.749175	0.611765	0.174571	0.527115	0.727612	0.0451045	0.240051	0.336585	0.187291	1.83871	1.2365
518		-0.00628931	-0.0551053	-0.0027248	0.128024	0.152692	0.104575	0.553191	-0.012987	0.0242215	-0.0109091	0.255753	0.393103	-0.0227378	0.155779	0.768014	0.037931	0.031405	-0.0874786	0.770115	-0.00990099	0.190031	0.920732	0.0280899	0.0503356	-0.0858676	1	0.361854	0.46988	1.06526	0.130912	0.0969646	0.649573	-0.027027	2.60218	0.417066	0.939394	0.100478	0.710526	0.383721	0.160752	0.514768	0.614679	0.0141767	0.182744	0.266667	0.236281	1.71269	1.34097
519		0.0382294	0.0584416	-0.0131926	0.154713	0.010118	0.0979757	0.416667	-0.0551181	0.0998185	0.0414508	0.120735	0.328859	0.0695936	0.100164	1.00739	0.049236	0.0731707	-0.138983	0.849711	0.044335	0.149948	0.786744	-0.299191	-0.00974026	0.116541	0.855186	0.385996	0.45	0.836614	0.116816	0.0705155	0.532787	0.0257235	2.39747	0.337748	0.726619	-0.20362	0.81761	0.325843	0.1692	0.634312	0.783304	0.0426487	0.186335	0.461538	0.167412	1.98473	1.03855
520		-0.0775681	0.0185036	0.0802139	0.176611	0.0991453	0.109272	0.571429	-0.272727	0.0631579	0.0408377	0.174084	0.24633	-0.00652985	0.0406504	1.06738	0.00851789	0.0986395	-0.0428816	0.824363	0.262626	0.110228	0.538462	-0.178273	0.0534846	0.0707804	1.11064	0.346429	0.52	0.89391	0.103868	0.0970914	0.687204	0.0675039	2.60112	0.516288	0.577236	-0.188406	0.742574	0.45679	0.22561	0.540426	0.578755	0.0181818	0.22273	0.287671	0.176043	1.96512	0.926097
521		-0.0147368	-0.00243704	-0.0213904	0.155475	0.217547	0.0766747	0.452632	0.00429185	-0.0175439	0.0774026	0.199465	0.266776	0.0399248	0.0574713	1.01042	-0.0333333	0.0562914	-0.0602007	0.933535	0.228571	0.145492	0.520661	-0.194667	-0.0903328	0.012844	0.903226	0.44186	0.101796	0.805068	0.148325	0.0542571	0.444934	0.00914634	2.29323	0.344106	0.822222	-0.246512	0.807309	0.0769231	0.128364	0.4371	0.751391	0.0696654	0.289683	0.246512	0.201041	1.88538	1.08431
522		0.0383838	0.0353328	0.0193906	0.207479	0.151405	0.10311	0.59322	-0.121739	0.0104895	0.0225249	0.149533	0.472028	0.000457666	0.0609555	0.951304	0.0137457	0.0199336	-0.133333	0.817109	0.220513	0.123849	0.746398	-0.293011	0.0519031	0.17603	1.2913	0.35689	0.530864	0.9	0.108014	0.0933558	0.522523	0.0353698	2.74648	0.463035	0.873016	-0.368421	0.76	0.408284	0.217304	0.496774	0.812155	0.0284464	0.196647	0.409091	0.207718	1.63082	1.0804
523		-0.024	-0.0256	-0.0320856	0.162874	0.191257	0.0664424	0.56044	-0.112971	-0.0546737	0.0538985	0.114191	0.237718	0.0244591	0.0457516	0.821782	0.132174	0.003367	0.0276817	0.873112	0.443396	0.0368852	0.67027	-0.0368272	0.0493421	0.192381	1.03797	0.390511	0.22619	0.972222	0.191527	0.0273581	0.781659	-0.0473282	2.84118	0.400571	0.774194	-0.244019	0.723684	0.494253	0.15727	0.477178	0.622103	0.0612245	0.2	0.598039	0.143475	1.56522	0.900709
524		-0.0466926	-0.0107527	0.0844687	0.1782	0.0859574	0.0042123	0.333333	-0.0617284	0.0092081	0.0613108	0.157258	0.433099	0.0669145	-0.0110236	1.01101	0.159213	0.0881356	-0.0410714	0.828221	0.492537	0.144958	0.865854	-0.0743802	0.0188679	0.0766284	1	0.428571	0.232704	0.763107	0.0681337	0.0256195	0.722222	-0.0015949	2.47368	0.459981	1.15517	-0.188406	0.68254	0.183908	0.308086	0.462012	0.731061	0.0341786	0.258824	0.560209	0.141235	1.62816	0.789474
525		-0.002079	0.096138	0.12973	0.0902527	0.117069	0.0881864	0.380435	-0.208333	-0.027933	-0.00880373	0.18617	0.317881	0.0439663	0.0192926	0.82548	0.182594	0.0535117	-0.0945946	1.0061	0.192118	0.143737	0.797688	-0.356589	0.00664452	0.22366	1.12146	0.363636	0.188235	1.24603	0.088727	0.0338843	0.692982	0.0330709	2.88669	0.296473	0.57377	-0.175926	0.916955	0.707006	0.262616	0.608511	0.671642	0.054505	0.24727	0.507109	0.174895	1.66548	1.29723
526		0.0251046	0.044335	0.15	0.123636	0.136767	0.126164	0.421053	-0.0209205	0.0635209	0.0498688	0.0864865	0.534483	-0.029304	-0.0976	1.04475	-0.0123023	0.0822368	-0.0487805	0.699387	0.220183	0.125	0.538889	-0.430894	0.0921739	0.18	1.12863	0.252708	0.310734	0.679245	0.0943723	0.0690385	0.754717	0.0584518	2.51841	0.398313	1.06504	-0.194444	0.986348	0.40107	0.132308	0.336049	0.649446	0.0294118	0.21879	0.476636	0.176151	1.88636	1.18138
527		0.029661	0.0815174	0.142091	0.19708	0.105778	0.0240265	0.419689	-0.0755556	0.0145985	0.075594	0.144016	0.00452489	0.0112254	0.0586319	1.16147	-0.0207075	0.16129	-0.00863558	0.944954	0.353846	0.0376399	0.932308	-0.157895	0.123478	-0.0694698	1.06709	0.35568	0.542484	1.03929	0.145733	0.102075	0.819048	0.0157233	2.49051	0.488417	0.95082	-0.342466	0.971731	0.211765	0.139607	0.411523	0.569288	0.0748999	0.450952	0.376884	0.184258	1.6553	1.19139
528		-0.0263692	0.113821	0.0352304	0.172414	0.0159933	0.0656692	0.602041	-0.142857	-0.0115385	0.107945	0.187584	0.433099	0.0669234	0.0345964	1.03929	0.0157343	0.102041	-0.00346021	0.830816	0.572139	0.191402	0.818731	-0.152355	0.0225303	0.0773481	1.19616	0.323364	0.428571	0.672584	0.0999124	0.048097	0.680365	0.0734824	2.69412	0.393881	1.06667	0	0.959184	0.5	0.221311	0.419492	0.60367	0.0142232	0.216113	0.427184	0.192391	2.02146	1.20888
529		0.0863158	0.144304	0.0648649	0.155828	0.0656997	0.0731293	0.54023	-0.0720721	0.0332681	0.0778378	0.230664	0.274247	0.016129	0.142857	0.899306	0.0670148	0.181507	-0.0278746	0.837838	0.0425532	0.129098	0.4375	-0.104046	0.0904437	0.0707457	1.03272	0.270321	0.532468	0.487078	0.113576	0.122762	0.49345	-0.0425197	2.50404	0.36699	0.966102	-0.0666667	0.902778	0.488372	0.188078	0.368421	0.675472	0.110122	0.133657	0.429907	0.202189	1.8502	1.00978
530		0.0916497	0.0724876	-0.0427807	0.151515	0.0963636	0.0834725	0.611429	-0.190083	-0.0819672	0.0371167	0.182399	0.391916	-0.00615239	0.0302067	0.941818	0.045614	0.0745763	-0.0623886	0.742857	0.106977	0.120419	0.969136	-0.002849	0.0469799	0.193738	0.861224	0.25784	0.364706	0.880952	0.19533	0.0414353	0.84141	0	2.47757	0.48075	0.693548	0.0147783	0.910653	0.5625	0.166498	0.544885	0.699275	0.0542202	0.374013	0.453704	0.218179	2.10236	1.05238
531		-0.120968	0.112572	0.0238727	0.159119	0.22735	0.0631665	0.638418	-0.0295359	-0.0185185	0.141157	0.149933	0.407279	-0.0248011	0.105348	1.01835	0.0388007	0.190395	0.0170648	1.05678	0.349282	0.110643	0.533333	-0.320652	0.0681818	0.0692308	1.175	0.346429	0.576159	0.775468	0.166003	0.12007	0.376	-0.0217391	2.55801	0.523139	1.13913	-0.168317	0.78481	0.488095	0.158228	0.664459	0.608696	0.0598099	0.25323	0.278539	0.201056	2.1004	1.08273
532		0.0186335	-0.0285714	-0.00277008	0.123188	0.121646	0.0904437	0.315789	-0.0655738	0.0291971	0.00321888	0.14885	0.383244	0.0288416	-0.0112721	1.17958	-0.0103986	0.07	0.0967742	0.91018	0.192308	0.205394	0.920245	0	0.115254	0.147287	1.08584	0.184783	0.421053	0.869215	0.0987275	0.00643501	0.739535	0.0188679	2.84831	0.403442	1.22609	-0.173077	0.864769	0.306358	0.23494	0.55102	0.590494	0.057971	0.439908	0.265487	0.187997	2.132	1
533		-0.055336	0.103907	0.0684932	0.154862	0.165312	0.104825	0.187817	-0.131915	0	0.0294118	0.209843	0.375212	0.0562648	0.00332226	1.01408	0.00430663	0.0416667	0.0492958	0.772595	0.488636	0.142857	0.594521	-0.105413	0.0380623	-0.0804388	1.31489	0.340619	0.55414	0.804082	0.0676759	0.054561	0.681818	0.0278232	2.40609	0.397287	0.725191	-0.152381	1.12546	0.227513	0.235908	0.572985	0.75048	0.031405	0.294118	0.376147	0.197601	1.8062	1.03791
534		0.0847458	-0.0355731	0.0581717	0.17132	0.056719	0.102322	0.426966	0.0877193	-0.00554529	0.0827887	0.208702	0.346021	-0.0476636	0.096463	1.10507	0.000890472	0.074266	-0.0273973	0.897281	0.23	0.136691	0.904192	-0.176136	0.0988275	0.181818	1.36325	0.381481	0.416667	0.816667	0.084154	0.0507592	0.677966	0.0208668	2.55497	0.557158	1.01613	-0.131707	0.922807	0.288136	0.167868	0.542484	0.660448	0.0239651	0.247918	0.361905	0.172442	2.09412	1.23188
535		0.0408602	-0.000809717	0.0877193	0.191358	0.116756	0.0609137	0.176471	0.00862069	0.00196078	0.0678979	0.244997	0.252033	-0.0271299	0.137705	1.22909	0.0773241	0.104895	-0.102041	0.718391	0.34375	0.132505	0.563218	-0.319209	0.08	0.158103	1.02083	0.170819	0.540541	0.514056	0.0862144	0.0991626	0.548387	0.0404984	2.42246	0.421158	1.33333	-0.0447761	0.681818	0.509677	0.209253	0.488372	0.506796	0.0686937	0.434269	0.435185	0.156543	2.17899	1.0678
536		0.116998	0.0484653	0.102041	0.151813	0.0169492	0.120823	0.719512	0.0782609	0.03861	0.0434783	0.176949	0.386482	-0.012476	0.152027	1.12522	0.0493197	0.115108	0.0243902	0.784257	0.329949	0.132159	0.711765	-0.290503	-0.0167785	0.0694981	1.3114	0.477273	0.471698	0.940574	0.159236	0.042123	0.894737	0.110749	2.83768	0.54717	0.65	-0.0571429	0.882736	0.0778443	0.349189	0.663755	0.77907	0.0631342	0.322034	0.43128	0.1752	2.29796	1.12903
537		-0.0274841	0.0627063	-0.164835	0.183047	0.107481	0.0471464	0.372973	-0.15	-0.0983302	0.0714681	0.144258	0.336752	0.0519295	0.156667	1.08989	0.114385	0.160745	-0.0191304	0.828571	0.468085	0.160256	0.690058	0.0969697	0.0788091	-0.0978648	1.02542	0.493578	0.202454	0.597561	0.125809	-0.0170054	0.840708	0.116203	2.3649	0.515516	1.26316	-0.120773	0.884746	0.4625	0.123711	0.644444	0.700758	0.091419	0.220102	0.466019	0.148472	1.96899	1.24198
538		0.0368764	-0.010952	0.175793	0.161893	0.0689949	0.06934	0.476744	-0.194915	-0.0133333	0.0240437	0.188705	0.580817	0.0052108	-0.0626003	1.27344	-0.034915	0.07	-0.154412	0.82235	0.655556	0.150424	0.862295	-0.15847	-0.0769231	0.210216	1.28157	0.507576	0.381818	0.758197	0.139194	-0.00840336	0.808219	0.143322	2.48072	0.525955	1.01802	-0.162562	0.743243	0.337209	0.197452	0.570796	0.679688	0.00112613	0.279584	0.497537	0.143855	2.35827	1.26168
539		0	-0.0277544	0.0315186	0.19084	0.0939655	0.0996622	0.539326	-0.177489	-0.0728972	0.0605565	0.177119	0.389655	-0.0359368	-0.0295082	1.1146	0.148282	0.101754	-0.132616	0.870588	0.189474	0.118971	0.96904	-0.035503	0.0278746	-0.0802139	1.26906	0.277778	0.333333	0.388773	0.165843	0.0508764	0.60181	0.0351438	2.30851	0.488603	1.10526	-0.0510204	0.973154	0.513514	0.220833	0.628635	0.663516	0.100948	0.418639	0.212963	0.165466	2.19753	1.16
540		-0.0021322	0.0140845	0.137026	0.197312	0.0949033	0.0848586	0.635359	-0.214286	-0.0561798	0.078022	0.222535	0.485009	-0.0285442	0.0247934	1.05303	0.0449339	0.170819	-0.0327022	0.656805	0.350515	0.0998926	0.797546	-0.0979228	-0.00361011	0.122736	0.957627	0.365201	0.364238	0.717742	0.147526	0.0620155	1.07339	0.0766823	2.89318	0.486974	1.29565	-0.145729	0.805195	0.441558	0.238403	0.604348	0.584466	0.0265487	0.245556	0.336634	0.172745	2.54867	1.23116
541		0.0151188	0.00833333	0.0415512	0.117829	0.0578292	0.113597	0.25	-0.140496	0.0707457	-0.0209021	0.203331	0.494424	-0.0273327	0.0477816	1.08602	-0.0190972	0.132743	0.134545	0.796296	0.425414	0.112782	0.391061	-0.334262	0.0139373	0.190184	1.08879	0.222018	0.782051	0.686598	0.127442	0.0276478	0.62931	0.135566	2.77522	0.51497	1.07339	-0.00507614	0.916667	0.528662	0.221505	0.611814	0.762452	0.155429	0.241144	0.628141	0.185775	1.84674	1.42894
542		0.0809628	-0.0246711	-0.0340909	0.153942	0.17189	0.0913706	0.674157	-0.175966	-0.0182482	0.0509233	0.193277	0.535211	-0.0467112	0.0860034	0.920145	-0.0309461	0.119863	0.00897666	0.967427	0.284211	0.068929	0.833333	-0.20944	0.0347222	0.161943	1.33407	0.380497	0.245283	1.5902	0.093764	0.0676884	0.43379	0.0754098	2.94798	0.462151	0.570248	-0.142857	0.848684	0.469388	0.204348	0.690632	0.713163	0.138603	0.349685	0.479167	0.177883	1.87591	1.41117
543		-0.0560345	-0.0390492	-0.0457143	0.113846	0.0719794	0.097706	0.583333	-0.0292887	0.0019802	-0.013468	0.153275	0.556364	-0.00191755	0.0635452	0.92467	0.0841629	0.16696	0.0626118	0.916914	0.136612	0.12931	0.670659	-0.165217	0.101549	0.121951	1.2265	0.28839	0.421384	0.954545	0.177707	0.0457627	0.772727	-0.0178282	1.95607	0.452217	1.64815	-0.292308	0.980132	0.31677	0.25	0.57563	0.565385	0.101237	0.300412	0.316327	0.173717	1.88803	1.0804
544		-0.0575693	0.0204778	0.0346821	0.229994	0.147469	0.126095	0.432099	0.0136986	-0.0289256	0.0954831	0.218794	0.500952	0.0307397	0.0636215	1.13011	-0.0334507	0.125214	-0.0631579	0.838806	0.484211	0.157895	0.745562	-0.261628	0.13438	0.313684	1.3318	0.243346	0.197531	1.44742	0.143251	0.0451448	0.508621	0.196721	2.39481	0.496078	1.05042	-0.221154	0.965986	0.592105	0.196121	0.600887	0.662083	0.0540098	0.25641	0.43	0.163554	1.82847	1.24365
545		-0.0151188	0.0519931	0.0847458	0.144845	0.0543971	0.141631	0.363636	-0.0386266	0.00990099	0.0986395	0.194313	0.620818	0.0235238	0.0310966	1.25556	-0.0107817	0.109272	0.0216606	0.847953	0.402299	0.174638	0.45245	-0.207602	0.0736301	0.195122	1.44009	0.454191	0.414634	0.752049	0.0122449	0.0109027	0.624454	0.083871	2.58046	0.485249	1.23636	-0.158416	0.992647	0.5	0.292709	0.626667	0.830303	0.107815	0.342503	0.339901	0.225769	1.87407	1.37037
546		0.0218341	-0.0502128	0.121212	0.0871731	0.00441696	0.0692375	0.554217	-0.0212766	-0.0544747	0.0891539	0.13205	0.411552	0.0711501	0.126516	1.10821	0.0851449	0.139896	-0.0180505	0.664671	0.626374	0.1	0.542029	-0.243478	0.0445205	0.160494	1.45	0.455598	0.773333	1.70291	0.122807	0.0776053	0.962617	0.117552	2.25926	0.523904	1.20561	-0.0392157	0.95	0.455696	0.180294	0.710468	0.677536	0.104848	0.295238	0.353234	0.177371	2.13834	1.10025
547		0.0272537	-0.0325815	0.011236	0.206762	-0.100612	0.11014	0.896552	-0.219512	0.046332	0.0868095	0.165768	0.658537	0	0.132867	1.05996	-0.0204444	0.276522	-0.0127971	0.388451	0.446809	0.132804	0.720497	-0.278873	-0.0629371	0.109344	1.32184	0.35	0.465839	0.880165	0.109282	0.0704595	0.962963	0.101911	2.56164	0.580645	1.11215	-0.0679612	0.820598	0.22293	0.187638	0.654545	0.796875	0.0725943	0.282609	0.336493	0.18249	2.03346	1.09615
548		0.073913	-0.0537634	-0.0571429	0.203125	0.104356	0.148709	0.509434	-0.0263158	0.0155039	0.0616005	0.163043	0.509769	-0.019496	0.0565428	1.21691	0.132841	0.0967742	-0.143382	0.814815	0.57377	0.184615	0.845697	-0.0753623	0.10989	0.260042	1.33184	0.376726	0.36646	1.6875	0.128704	0.011653	0.5	0.234694	2.13896	0.536437	0.944954	-0.133005	0.958478	0.454545	0.261438	0.604396	0.624288	0.0467186	0.220499	0.540816	0.205692	2.17447	1.34518
549		-0.00436681	-0.0631229	0.242604	0.182454	0.116872	0.109155	0.423529	-0.0267857	-0.0152672	0.0634921	0.166434	0.575092	0.0691824	-0.0490694	1.12663	0.0903342	0.255898	-0.00183486	0.747801	0.447917	0.0697168	0.573099	-0.321637	-0.0363951	0.274633	1.18763	0.34252	0.471698	1	0.199628	0.0155172	0.820628	0.175676	2.77843	0.476239	1.08929	0.0190476	1.16606	0.509934	0.269103	0.717391	0.539595	0.0297143	0.311295	0.445545	0.187156	1.69261	1.39303
550		0.0530973	0.0288625	0.162338	0.144144	0.149415	0.0944742	0.668712	-0.0803571	-0.048	0.0717154	0.192712	0.416514	0.0846457	0.0729167	1.1287	0.0352304	0.222018	0.0170778	0.810089	0.530055	0.130045	0.881988	-0.325301	0.0733788	0.171548	1.19149	0.40625	0.533333	1.53249	0.140213	-0.0218042	0.680751	0.211506	2.92	0.519763	1.42	0.0052356	1.23616	0.418919	0.217578	0.823821	0.785992	0.0638058	0.310959	0.507246	0.171072	2.24219	1.26972
551		0.0678337	0.00851789	0.0918919	0.152742	0.103167	0.0519824	0.56213	0.0438596	0.0583658	0.0100559	0.198635	0.48244	0.0760118	0.106164	1.1769	0.0571696	0.158813	-0.0968921	0.767164	0.480226	0.126792	0.77971	-0.0689655	0.0636042	-0.0600775	1.45778	0.46332	0.453333	0.761317	0.129091	0.0469283	0.890909	0.0789916	2.58046	0.547667	0.982609	-0.0212766	1.07432	0.623377	0.306931	0.686364	0.610236	0.0165999	0.305714	0.515789	0.205483	1.60075	1.5
552		0.0900901	0.0160338	0.107345	0.134216	0.00262467	0.0486111	0.0625	0.0218341	-0.0141988	0.105829	0.187151	0.4	0.00193424	0.157168	1.25843	0.0663034	0.0993151	0.0588235	0.969419	0.52381	0.117904	0.786834	0.00294985	0.130125	0.061144	1.46437	0.456274	0.527273	1.572	0.182153	0.0850877	0.7	0.108626	2.64607	0.545825	1.25424	-0.106796	0.798701	0.337423	0.20132	0.601732	0.716505	0.00924855	0.323276	0.454545	0.21256	2.41277	1.45714
553		0.0741573	0.0351171	0.0350877	0.202623	0.094196	0.0569676	0.193548	0.0222222	0.0781563	0.0791855	0.162562	0.308511	0.0698795	-0.0324675	1.13011	0.0635945	0.0598592	-0.040293	0.927928	0.515789	0.137472	0.673591	-0.129412	0.0318021	0.18107	1.45701	0.403226	0.321212	1.05544	0.155946	0.0838087	0.820628	0.0100671	2.53067	0.676829	1.32432	-0.19	1.05634	0.534884	0.2382	0.608696	0.665354	0.0605714	0.262578	0.316327	0.137333	1.76344	1.27685
554		-0.0355556	-0.00081367	-0.186441	0.159895	0.0979667	0.0821168	0.748503	-0.0614035	0.13556	0.073368	0.208362	0.509579	0.071076	0.0745234	1.31694	0.0658251	0.111511	0.0364964	0.930159	0.39267	0.0921053	0.438272	-0.0820669	0.162304	0.294624	1.4	0.482072	0.0980392	1.73745	0.14695	0.0674256	0.786667	0.102439	2.62468	0.596386	1.40351	-0.266667	1.08633	0.329114	0.232456	0.894366	0.694716	0.0429159	0.320442	0.300971	0.192044	1.91538	1.44744
555		-0.0618337	-0.0160881	0.074184	0.223995	0.0287206	0.0864422	0.59322	-0.0803571	0.0897959	0.050202	0.141259	0.474088	0.0220264	0.0899654	1.15665	0.0789963	0.271739	-0.00722022	0.89375	0.438202	0.14922	0.670659	-0.215569	-0.0273038	0.0445736	1.5354	0.388145	0.445161	0.861635	0.130909	0.0905077	0.577093	0.162791	2.96979	0.543895	1.2963	-0.266332	0.955056	0.66879	0.232163	0.579618	0.820312	0.0253165	0.265928	0.292929	0.151729	2.19685	1.41398
556		-0.044843	0.0101695	0.236025	0.190981	0.105973	0.0566038	0.4875	-0.0941704	0.0905433	0.0423012	0.14246	0.531532	0.0266535	0.202773	1.16327	0.0336879	0.0866426	-0.010989	0.808917	0.25	0.288636	0.655786	-0.0863095	0.116608	-0.0184049	1.11465	0.474542	0.509677	0.893617	0.163972	-0.0132196	0.98	0.0634146	2.51567	0.56978	1.65957	-0.0104167	0.657895	0.337662	0.232123	0.655329	0.700971	0.0679157	0.283229	0.278049	0.19577	2.13846	1.33418
557		0.0691244	-0.0253807	0.16875	0.155327	0.0688652	0.0334237	0.452229	-0.103139	-0.00790514	0.0314961	0.0983607	-0.0934579	0.029	0.0420168	1.34118	-0.0522456	0.161062	0.0290135	1.02667	0.452381	0.0885246	0.688474	-0.284058	0.0828924	0.165669	1.36526	0.461078	0.381579	0.718367	0.116871	0.050906	0.820755	0.204659	2.58601	0.543568	1.30088	-0.0309278	1.12925	0.428571	0.284916	0.723502	0.757937	0.0676692	0.251366	0.383838	0.168444	1.88618	1.24
558		0.0769231	0.0382609	0.128049	0.139175	0.196253	0.107304	0.795181	0.181818	0.0976562	0.00574713	0.250545	0.496324	0.017017	0.00696864	1.20744	0.0188679	0.119403	-0.0814815	0.548387	0.662791	0.0680045	0.552795	-0.0769231	0.0654867	0.0979167	1.57336	0.332046	0.408805	0.588865	0.0747621	-0.0454352	0.819005	0.0387097	2.88957	0.561508	1.38095	-0.0520833	1.14074	0.467626	0.274554	0.707317	0.809524	0.103081	0.19812	0.515464	0.172797	2.22892	1.32905
559		0.0565217	-0.108153	-0.0716332	0.11068	0.128846	-0.048976	0.514451	0.0648148	0.0981964	0.0762911	0.14986	0.696	0.0144638	0.00831947	1.11027	-0.0333919	0.0860215	-0.0165138	0.575385	0.502959	0.0221286	0.658385	-0.242604	0.0706714	0.095723	1.48989	0.454175	0.523179	0.979253	0.142059	-0.0245161	0.701357	0.166381	2.66857	0.518887	1.33962	-0.040404	1.19708	0.54717	0.320628	0.709007	0.76	0.0842664	0.272986	0.346535	0.132376	1.86614	1.512
560		-0.0198675	0.038693	-0.0960452	0.109385	0.299795	0.0978957	0.541176	-0.112108	0.0406504	-0.0157434	0.115521	0.588785	-0.0542321	0.0798611	1.21469	0.087942	0.147601	0.0170132	0.94822	0.431579	0.0929451	0.81875	-0.252174	0.00353357	0.0981964	1.38298	0.420523	0.5	0.712418	0.0970425	0.0119205	0.608696	0.0655738	2.77313	0.713985	1.63918	-0.247619	1.06993	0.519481	0.135722	0.618625	0.820359	0.0452436	0.235537	0.28125	0.180886	2.272	1.31688
561		0.0566893	0.00340716	0.10574	0.15544	0.200368	0.0481381	0.298246	-0.0956522	0.0499002	0.073903	0.151472	0.602251	-0.0413141	0.0528169	1.25139	0.00715564	0.177536	0.00185529	0.866242	0.570621	0.233796	0.590214	-0.319444	0.0232558	0.290749	1.53812	0.399177	0.358974	0.896996	0.113002	0.0899609	0.705069	0.0457516	2.89759	0.562762	1.30769	-0.15625	1.22222	0.102564	0.227119	0.628009	0.843621	0.0754605	0.312456	0.269036	0.185587	2.06897	1.57386
562		0.0762332	-0.0491803	0.136778	0.123107	0.0555556	0.0588235	0.616766	-0.0288462	0.0819672	0.0627178	0.233358	0.512381	0.059596	0.109565	1.20364	-0.0142349	0.285981	0.0264151	0.886567	0.479769	0.190476	0.646341	-0.277937	0.0191972	0.106996	1.40371	0.424	0.490446	0.676596	0.16635	0.0277655	0.820755	0.113674	2.71429	0.54664	1.01667	-0.15	1.05714	0.304348	0.329519	0.559242	0.594747	0.06955	0.249645	0.373134	0.173714	1.80972	1.47215
563		-0.0246085	-0.00432152	0.164087	0.139241	0.111111	0.128913	0.493976	-0.151786	0.149798	0.0485096	0.144293	0.513725	0.0388833	0.183746	1.38023	-0.00554529	0.16	0.0833333	0.954248	0.468927	0.0513393	0.825	-0.135135	0.141324	-0.00201207	1.45176	0.425051	0.490446	0.714286	0.049299	-0.0105914	0.735849	0.141379	2.75078	0.489879	1.5	-0.126316	1.13534	0.428571	0.229898	0.806005	0.776	0.0539568	0.310493	0.343137	0.135509	1.95397	1.32718
564		0.0460829	0.0210526	0.0509554	0.189974	0.266364	0.0941286	0.612121	-0.0934579	0.153226	0.00692042	0.180966	0.69505	0.0613718	-0.0541012	1.20357	0.00618921	0.092559	-0.108656	1.10561	0.42268	0.205069	0.746032	-0.138643	0.112245	0.175439	1.70813	0.40519	0.396226	0.724731	0.0940092	0.0993789	0.769231	0.0224359	3.03125	0.659619	2.28713	-0.232323	1.125	0.359477	0.243736	0.780374	0.739308	0.0583333	0.259767	0.205882	0.184264	1.8427	1.33248
565		0.0657277	0.0592396	0.103245	0.206391	0.0655586	0.12218	0.465839	-0.038835	0.130435	0.0335097	0.223924	0.692929	0.0736414	0.0726644	1.18579	-0.105263	0.118199	-0.0875233	1.14765	0.311111	0.107103	0.916955	-0.240741	0.0512821	0.194154	1.68269	0.559252	0.452229	0.941788	0.0966543	-0.000451467	0.88	0.0281924	3.02477	0.560874	1.0198	-0.349754	0.853659	0.362319	0.25977	0.748315	0.781818	0.0408401	0.32713	0.396985	0.20837	2.1284	1.25543
566		-0.134118	0.000864304	0.137725	0.186577	0.0446602	0.0670241	0.743243	-0.347032	0.152	-0.00175336	0.232996	0.517375	0.00544824	0.104056	1.24092	-0.00181159	0.168242	-0.0018018	0.891374	0.348571	0.288788	0.779141	-0.307692	0.174377	0.251082	1.41176	0.474542	0.687075	0.654867	0.166195	0.0539193	0.98	0.174281	2.66154	0.582809	1.56311	-0.182692	1.21402	0.233766	0.3379	0.607143	0.643678	0.0289769	0.309958	0.497487	0.145653	2.22951	1.12403
567		0.0328638	-0.0329289	0.263492	0.150794	0.074108	0.0801457	0.644172	-0.0604651	0.00606061	-0.0248411	0.223287	0.549909	0.00962025	0.0511945	1.43254	-0.0836364	0.124283	0.0340909	1.03236	0.388889	0.157062	0.84375	-0.27381	0.164835	0.233766	1.63789	0.494737	0.154362	0.822616	0.132255	0.0496703	0.871287	0.221088	3.3245	0.61658	1.57944	-0.0510204	1.26154	0.380645	0.289504	0.64574	0.638171	0.0320629	0.349275	0.326531	0.157079	2.02652	1.06436
568		0.0257611	0.02698	0.113703	0.128674	-0.000907441	0.0655738	0.6125	-0.153153	0.149474	0.040901	0.176471	0.462963	-0.0100908	0.0687285	1.20333	0.00542495	0.185606	0.0916179	0.859756	0.275862	0.219288	0.781931	0.00934579	0.113438	0.257511	1.61395	0.602484	0.467532	0.866109	0.157645	0.02	0.875556	0.197987	2.87179	0.553236	1.40385	0.0150754	1.13669	0.259259	0.199552	0.729469	0.700205	0.0815085	0.220411	0.323232	0.189221	1.92015	1.43915
569		0.055814	0	0.0759494	0.167759	0.0662824	0.183443	0.625	-0.170306	0.153527	-0.0513113	0.0342772	0.546314	0.0190036	0.00894454	1.27407	0.0197133	0.297087	-0.0226415	0.975078	0.491713	0.256439	0.527869	-0.0892308	0.175221	0.265393	1.56796	0.417879	0.509934	0.767816	0.0752089	0.0840787	0.813953	0.120954	2.5389	0.5125	1.07477	-0.223881	1.06406	0.426573	0.18743	0.640187	0.667304	0.0241888	0.208044	0.12	0.184463	2.26316	1.30027
570		-0.00677201	0.0311419	0.0892308	0.0765273	0.0753676	0.16826	0.6375	-0.271186	0.117296	0.0220418	0.0990023	0.642436	0.0324544	0.11775	1.28627	0.149212	0.0603774	0.047259	0.993506	0.425414	0.187935	0.578313	0.0566038	0.127928	0.122056	1.379	0.54334	0.560284	0.689655	0.142446	0.058456	0.732057	0.14966	2.92763	0.529167	1.17476	-0.0106383	1.35115	0.36646	0.425028	0.701099	0.81323	0.0627719	0.224138	0.357513	0.187153	2	1.44041
571		0.0613208	-0.021164	0.283388	0.152862	0.0105465	0.103321	0.478261	-0.12931	0.0548523	0.000597015	0.13089	0.478873	0.00821355	-0.0365217	1.39357	-0.00185874	0.0180505	-0.00580271	0.93808	0.193717	0.317919	0.684887	-0.178571	0.0738007	0.179541	1.38117	0.443983	0.812081	0.801802	0.154916	0.0538394	0.658986	0.215827	2.90769	0.673913	1.56863	-0.277487	1.27636	0.628571	0.337915	0.863529	0.839836	0.0884686	0.355067	0.165775	0.151346	2.124	1.52742
572		0.0761905	0.00438982	0.0404984	0.144781	0.0398445	0.0982226	0.87013	-0.00961538	0.225225	0.0742515	0.106038	0.416667	0.0107858	0.0323741	1.12868	-0.097561	0.126214	-0.0318725	0.954248	0.242604	0.202718	0.713355	-0.316456	0.246824	0.127349	1.70813	0.534591	0.0864198	0.891648	0.15658	0.0689183	0.826087	0.00834725	2.83648	0.528067	2.46341	-0.144444	1.19923	0.391304	0.259516	0.861905	0.8125	0.0626536	0.340252	0.270833	0.15682	2.28099	1.52688
573		-0.0267857	0.0218723	-0.0666667	0.131367	-0.00188324	0.0902256	0.506667	-0.154545	-0.0413223	0.0422871	0.123066	0.634981	0.0157121	0.10991	0.90991	-0.0842697	-0.00927644	-0.0538462	0.975	0.535714	0.21789	0.590909	-0.204819	0.112701	0.188341	1.37557	0.242915	0.780822	0.762931	0.127255	0.0602853	0.904762	0.186441	2.92145	0.812918	1.40385	-0.15847	1.47761	0.306122	0.146093	0.890995	0.675048	0.033033	0.601998	0.19598	0.206066	1.95312	1.37129
574		0.0702179	0	-0.147335	0.171468	0.0858283	0.0226843	0.808219	-0.100437	0.0350515	0.0263158	0.0915645	0.531191	0.0529019	0.167286	1.2686	-0.011194	0.124283	0.072407	0.930818	0.371429	0.253488	0.525526	-0.123839	0.00173913	0.4	1.47087	0.473913	0.554054	0.679458	0.088632	0.0609865	0.702703	0.166667	3	0.67735	2.11364	-0.156757	1.36923	0.150327	0.307087	0.884337	0.778641	0.0825688	0.283951	0.4	0.158003	2.25292	1.5
575		-0.0114416	0.0120898	0.146497	0.178975	0.174825	0.0997204	0.109756	0.0943396	0.0927835	0.120292	0.134021	0.474061	-0.0507614	0.101754	1.31395	-0.143918	0.137405	-0.00571429	0.81155	0.494253	0.277389	0.668831	-0.119874	-0.0216606	0.200903	1.50926	0.476793	0.672956	1.10421	0.0137246	0.0606061	0.506726	-0.0423453	2.4939	0.708333	1.58	-0.235602	1.32714	0.533333	0.270483	0.749409	0.760684	0.0834857	0.235795	0.362637	0.15197	1.93284	1.267
576		0.0712644	-0.0284698	0.128205	0.234667	0.179487	0.120755	0.425287	0.0628019	0.0408163	0.0865385	0.227648	0.347985	-0.0554415	-0.0207612	1.29787	0.0254958	0.00938086	0.0340909	0.98722	0.470588	0.253456	0.854305	-0.209677	0.207477	0.170306	1.69647	0.542117	0.669065	0.612903	0.104077	0.0586678	0.726829	0.0689076	3.03096	0.504702	1.76768	-0.026738	1.30469	0.443709	0.370546	0.699552	0.735772	0.0122249	0.290228	0.411168	0.20345	2.06637	1.3856
577		0.204762	-0.0174825	0.0628931	0.181452	0.0290262	0.0858209	0.641975	-0.113208	0.0966387	0.0111437	0.127055	0.518116	0.0350515	0.0053286	1.35938	-0.113402	0.175542	0.0574713	1	0.428571	0.282742	0.945763	-0.0285714	0.203636	0.149028	1.58711	0.367556	0.159091	0.585421	0.137352	-0.0129291	0.779904	0.222615	3.19355	0.619048	1.56863	-0.308511	1.05091	0.319728	0.266515	0.691943	0.798768	0.105098	0.268041	0.34375	0.213403	1.65672	1.19355
578		-0.0779817	-0.121784	0.194805	0.0231328	0.14218	0.0929791	0.552941	-0.0363636	0.154989	0.0787733	0.157012	0.563851	-0.0279614	0.165714	1.60619	0.00956023	0.0560928	0.0136452	0.438806	0.511628	0.154664	0.713376	-0.226006	0.136612	0.0253165	1.70588	0.547569	0.541667	0.558887	0.0748166	0.0403587	0.695652	0.0847458	2.94984	0.613375	1.6422	0.0106383	1.2724	0.346405	0.332579	0.896956	0.950719	0.0677864	0.368968	0.396985	0.197085	2.02308	1.11911
579		0.0815851	-0.063979	0.260188	0.156062	0.102136	0.133333	0.731707	0.121951	0.00606061	0.0447227	0.222552	-0.0639626	0.0834202	0.0305206	1.35938	-0.0229665	0.0812854	0.034749	0.935275	0.615385	0.317757	0.581699	-0.071875	0.178439	0.238901	1.57528	0.481481	0.513158	1.01735	0.0925024	-0.00180995	0.613734	0.175043	2.87273	0.611169	1.7957	-0.121212	1.56349	0.64557	0.351101	0.974684	0.75	0.0821317	0.236203	0.11	0.169635	2.20332	1.08933
580		0.182266	-0.0977312	0.20915	0.11322	0.047081	0.200776	0.792208	0.0693069	0.152749	0.0665069	0.206373	0.435088	0.0686629	0.0276243	1.20339	-0.128788	0.11811	0.031746	0.859873	0.313609	0.312958	0.477707	-0.226586	0.13806	0.0512821	1.70983	0.572939	0.985294	0.460722	0.158614	0.0904957	1	0.0659898	2.79503	0.778761	1.78	-0.141414	1.592	0.165644	0.430622	0.696552	0.682093	0.0942928	0.296604	0.171717	0.15444	1.99153	1.33075
581		-0.0146341	-0.117338	0.0280374	0.20137	0.0725191	0.117813	0.503106	-0.102804	0.0660981	0.0579011	0.139881	0.589354	0.0222683	0.112676	1.12789	-0.0441459	0.280488	0.0538922	0.79375	0.206704	0.20892	0.528239	-0.2	0.168627	0.139875	1.74879	0.474138	0.447368	0.765766	0.142137	0.0201884	0.636364	0.117021	3.52201	0.684211	1.59574	-0.183246	1.30996	0.536232	0.27907	0.623853	0.874494	0.131127	0.306392	0.391304	0.197567	2.01119	1.36883
582		0.133172	0.0748663	0.207792	0.198353	-0.021093	0.0836502	0.830065	0.0288462	0.0717489	0.0723764	0.0918079	0.12013	0.0501292	0.0898876	1.3083	0.0909091	0.166008	0.00594059	1.12587	0.471264	0.376812	0.667712	-0.138037	0.0689013	0.221277	1.53864	0.507559	0.942446	0.894505	0.0914634	0.0431622	0.823529	0.172535	2.86145	0.62256	1.43396	-0.0631579	1.39114	0.324324	0.312856	1.0048	0.612245	0.10948	0.309278	0.276382	0.138262	2.10924	1.36702
583		-0.027027	-0.0492091	-0.021021	0.15	0.044592	0.117135	0.851351	0.0970874	0.12766	0.0724638	0.190332	0.555133	-0.0429448	0.0252708	1.39834	-0.0210325	0.0692308	0.0158103	0.875	0.602339	0.30617	0.670886	-0.159236	0.0749064	0.135965	1.55471	0.410256	0.608392	0.619687	0.0764677	-0.0353373	0.62963	0.0787671	2.42771	0.729323	1.38636	-0.195767	1.13523	0.776119	0.293441	0.801932	0.943478	0.1025	0.314498	0.0510204	0.182601	1.96923	1.20163
584		0.0757946	0.0491196	0.231746	0.179094	-0.178044	0.169847	0.371795	-0.243478	0.0561331	0.0679731	0.134218	0.532567	-0.0317949	0.0285714	1.38996	-0.0613027	0.192913	-0.0725191	1.06734	0.611111	0.258262	0.738255	-0.178788	0.0752294	0.190045	1.4821	0.463918	0.696552	1.15862	0.0556925	0.0557318	1.15385	0.295374	2.74018	0.623554	1.29787	-0.15625	1.51321	0.6	0.389151	0.69555	0.668737	0.0341463	0.307051	0.3	0.177108	1.95273	1.65957
585		-0.00980392	-0.0819964	0.163399	0.22449	-0.173664	0.125954	0.486842	0.0325581	0.15942	0.0557257	0.202096	0.544061	-0.00990099	0.2	1.29688	0.0155642	0.312757	-0.0565302	0.968652	0.8875	0.252427	0.619718	-0.219814	0.0228873	0.121951	1.35666	0.576613	0.487805	0.436681	0.00584226	0.0458295	0.849765	0.244681	3.26115	0.667022	1.75	-0.147368	1.11111	0.125	0.2331	0.823389	0.747454	0.0907968	0.324503	0.494624	0.112958	1.96443	1.14173
586		0.0727273	0.0998185	0.0774194	0.162696	0.211813	0.0830116	0.64557	0.0883721	0.00631579	0.0961776	0.130758	0.605469	-0.0114703	0.186441	1.27969	-0.0596878	0.151874	0.047619	0.8875	0.259259	0.269841	0.782178	-0.207792	0.0516252	0.238739	1.58852	0.469565	0.57047	0.783664	0.0888224	0.0704744	0.688073	0.299296	2.42857	0.64482	2.02222	0.0927835	1.3295	0.591549	0.34507	0.905	0.849687	0.0921293	0.31985	0.502703	0.146953	2.12351	1.15938
587		0	0.0603291	0.127036	0.171525	0.170297	0.032381	0.377246	0.107981	0.0632911	0.0351515	0.113387	0.494465	0.0398741	0.118467	1.59149	-0.0949612	0.132948	0.0020202	1.16938	0.511364	0.278107	0.645485	-0.258567	0.156934	0.130435	1.48622	0.575884	0.656442	0.627494	0.0991984	0.056933	0.700935	0.0461538	3.0396	0.558308	2.18182	0.027027	1.59055	0.617021	0.237327	0.848411	0.771784	0.0380062	0.342322	0.329843	0.187576	2.02128	1.6
588		0.027027	0.0445269	0.231788	0.15736	0.23374	0.154786	0.867647	0.0204082	0.106838	0.0644362	0.138909	0.608782	-0.00207684	-0.121597	1.22736	-0.00479386	0.19604	0.0534979	1.07166	0.333333	0.20094	0.395639	-0.0721649	0.0848708	0.121281	1.49038	0.502222	0.756757	0.810624	0.0393314	0.0209854	1.06316	0.0646259	2.77846	0.683983	1.8	-0.0366492	1.77912	0.40625	0.334951	0.812048	0.802105	0.0560101	0.312642	0.602151	0.188274	1.98901	1.25575
589		0.0272953	-0.0426111	0.146953	0.142053	0.0963973	0.114146	0.736527	0	-0.044898	0.13038	0.162687	0.56391	0.0259947	0.125683	1.38685	-0.0399221	0.0489237	-0.0555556	0.931973	0.554217	0.239437	0.519481	-0.121311	0.167608	0.0818182	1.92746	0.70614	0.638889	0.71236	0.149472	0.0322878	1.08	0.0927487	3.0066	0.703784	1.46316	-0.178378	1.28571	0.565789	0.335697	0.940447	0.673469	0.182674	0.282625	0.21393	0.209985	1.89683	1.44211
590		0.097561	0.0412466	0.130137	0.156187	0.178218	0.0134875	0.60274	0.257426	0.110132	0.0176722	0.145706	0.794549	0.081741	0.0892193	0.967568	-0.00970874	0.269155	0.0578512	0.767442	0.518987	0.200963	0.827586	-0.278689	0.0828516	0.0990991	1.84848	0.503185	0.450704	0.756098	0.09336	-0.000464037	0.970732	0.203571	2.71704	0.682641	1.75	-0.0232558	1.71094	0.27044	0.370192	0.875895	0.714286	0.0702703	0.281596	0.19403	0.159762	1.88889	1.37989
591		0.038835	0.090065	0.184466	0.194406	0.158115	0.0445104	0.701299	0.115578	0.209821	0.116751	0.123328	0.573123	0.0586991	0.0337478	1.44017	0.0154889	0.149105	0.00404858	1.13861	0.512821	0.295706	0.508091	-0.0342466	0.145985	0.244851	1.77283	0.539785	0.572414	1.15991	0.119312	0.00328176	0.638095	0.111111	2.71341	0.681098	1.54167	-0.172043	2.27711	0.310811	0.272727	0.942721	0.82377	0.107188	0.310962	0.265306	0.135583	2.45726	1.17204
592		0.117647	0.0787546	-0.0529801	0.166667	0.163121	0.0222222	0.512195	0.13	0.172113	0.0483871	0.201807	0.753425	0.0135983	0.148218	1.29942	0.00809717	0.261856	0.0962343	0.980066	0.325444	0.339045	0.734694	0.0945946	0.103053	0.233853	1.62617	0.590308	0.972789	0.579646	0.0923695	-0.00548446	0.793427	0.222973	2.94578	0.736434	1.76471	0.0444444	1.32753	0.728571	0.259434	1.00976	0.740206	0.111249	0.308092	0.20603	0.21718	2.38117	1.72571
593		0.0483092	-0.0413669	0.13245	0.105042	0.176955	0.142857	0.671053	-0.00497512	0.0364026	0.13253	0.142216	0.762097	0.0409234	0.038817	1.38941	-0.0133588	0.135246	0.0702479	1.03322	0.465116	0.267539	0.606349	-0.2	0.0429907	0.357143	1.56738	0.674518	0.633803	0.724289	0.106297	0.0724907	0.521531	0.303867	3.50177	0.648188	1.8125	0.0108696	1.79839	0.647887	0.203349	0.959079	0.852495	0.113924	0.338323	0.309278	0.238952	1.96414	1.58082
594		-0.00460829	0.0445269	0.177994	0.18117	0.0878578	0.137725	0.478261	-0.0541872	0.105727	0.111391	0.168332	0.462523	0.0244421	0.0601093	1.47904	-0.0123106	0.210744	-0.00816327	1.11565	0.358289	0.325183	0.519481	-0.167192	0.0457038	0.254005	1.93333	0.522388	0.875	1.05418	0.165834	0.0803738	0.672897	0.221053	2.16981	0.717322	1.4486	-0.268041	1.35821	0.517241	0.356295	0.813842	0.803347	0.0620347	0.254212	0.526316	0.23272	2.06329	1.48451
595		0.126615	0.00184162	0.149351	0.166432	0.105051	0.061144	0.531646	-0.0547264	-0.0985325	0.0658147	0.101707	0.880658	0.0851634	0.130435	1.13333	-0.113043	0.198312	0.043659	0.967638	0.627119	0.253659	0.669967	-0.034965	0.100952	-0.0610236	1.46081	0.625835	0.363636	0.687783	0.108481	0.0208044	0.746341	0.241993	2.83851	0.742857	1.87059	-0.0994764	1.66412	0.590909	0.279323	0.956204	0.773987	0.115708	0.236977	0.308108	0.233157	2.26891	1.20765
596		0.0735294	-0.0907457	-0.00671141	0.188302	0.0208901	0.113725	0.703226	-0.0153846	0.0905172	0.0234858	0.167309	0.548134	0.0382572	0	1.38563	-0.139806	0.145068	0.0327869	1.20328	0.568182	0.295844	0.540984	-0.00334448	0.146245	0.259091	1.78195	0.507368	0.424658	0.950893	0.0931493	0.052339	0.903743	0.235088	3.2013	0.644068	1.3299	-0.0502793	1.76078	0.544118	0.254948	0.828704	0.867521	0.0723514	0.296183	0.378947	0.233053	2.44493	1.27586
597		-0.0457831	0.0454545	0.266667	0.166307	0.212744	0.0609037	0.54491	0.297297	0.115646	0.136449	0.163297	0.663286	0.0424628	0.0846154	1.20809	-0.00871249	0.0813008	0.0460251	1.2069	0.579545	0.25988	0.667752	-0.360759	0.158301	0.245033	1.51799	0.481013	0.914894	0.61086	0.116896	0.0639291	0.92381	0.281307	2.31325	0.712755	1.93333	-0.247312	1.70204	0.390071	0.412334	0.856802	0.675214	0.0924262	0.368745	0.0744681	0.218799	2.52632	1.39896
598		0.0187793	-0.0525346	-0.025974	0.123088	0.0672016	0.15533	0.384615	-0.127451	0.0688073	0.0656469	0.112793	0.691992	0.00105263	0.166038	1.11946	-0.0340798	0.204082	0.0244898	1.2	0.573964	0.359223	0.668966	-0.218241	0.120968	0.237668	1.57619	0.681416	0.513889	0.74946	0.110887	0.073694	0.658986	0.255898	3.25806	0.649573	2.22892	-0.0793651	1.77733	0.364865	0.311398	0.950739	0.824411	0.0613267	0.386276	0.525773	0.206642	2.18966	1.58065
599		-0.0247525	0.0329257	-0.0347003	0.223837	0.120494	0.158325	0.61039	0.0373832	0.0457516	0.101523	0.172624	0.802062	0.00791557	0.0654206	1.52411	0.0205078	0.218295	0.0472279	1.06383	0.695122	0.305	0.483221	-0.256579	0.186858	0.193694	1.53465	0.524838	0.794521	0.990476	0.0983437	0.0195331	0.731959	0.260035	3	0.752464	1.96629	-0.157895	1.63291	0.41791	0.35023	0.808153	0.790356	0.108197	0.261725	0.365591	0.238051	2.30396	1.384
600		0.226316	-0.0118939	0.237762	0.213304	0.168085	0.0119048	0.666667	-0.040201	0.174312	0.0775047	0.29458	0.644711	0.0316354	0.115672	1.01527	-0.117871	0.251064	-0.0721649	1.1115	0.607143	0.317734	0.536424	-0.0596026	0.279208	0.247706	1.84833	0.77027	0.543624	0.991031	0.172199	0.0027933	0.869347	0.0716724	3.49306	0.76378	2.03797	-0.032967	1.78689	0.627907	0.283474	0.915	0.843478	0.116883	0.318253	0.0416667	0.234373	2.43662	1.37726
601		0.055	0.0432331	0.232877	0.148696	0.163636	-0.0935961	0.633588	0.211823	0.151927	0.105732	0.174847	0.758197	-0.0253165	0.0902394	1.54795	-0.0077821	0.252654	0.0954357	1.28777	0.690476	0.261577	0.519737	-0.143333	-0.0545455	0.131034	1.63704	0.601732	0.611511	0.949782	0.109744	0.10781	0.639175	0.301989	2.90596	0.699779	2.025	-0.101604	1.97095	0.666667	0.354446	1.03544	0.755889	0.0670103	0.299611	0.230769	0.210264	1.92742	1.496
602		0.26738	0.018622	0.119718	0.172611	-0.00193237	0.0292398	0.847222	-0.107843	0.106195	0.115265	0.0465294	0.698413	-0.0504065	-0.105634	1.24818	-0.0754352	0.100616	-0.0284553	1.02721	0.570552	0.354601	0.653061	-0.227119	0.203125	0.325527	1.64286	0.748879	0.688312	0.820331	0.0934673	-0.0324401	1.01031	0.335753	3.33677	0.653806	2.31707	-0.0160428	1.54745	0.432624	0.292383	0.800499	0.906383	0.0402042	0.309487	0.761905	0.219197	2.48696	1.48469
603		0.0904523	0.0811321	-0.0454545	0.196557	0.0866142	0.0153846	1.06061	-0.0805687	0.166667	0.183805	0.172932	0.590643	0.031333	-0.0108303	1.4246	0.0988372	0.219089	-0.168724	0.854985	0.649351	0.276119	0.532203	-0.216216	0.14786	0.292308	1.8593	0.71167	0.744361	1.06787	0.0554985	0.0293561	0.899497	0.215054	3.36486	0.643326	1.2766	-0.268041	1.82203	0.418919	0.451282	0.845361	0.816143	0.10271	0.292259	0.412429	0.220963	1.96234	1.37673
604		-0.0769231	-0.00934579	0.137809	0.156028	0.0215264	0.036963	0.8	-0.0640394	0.259259	0.0270603	0.180277	0.51145	-0.00793231	0.121673	1.37882	-0.0378274	0.181237	0.205021	1.08081	0.986577	0.358722	0.853147	0.0814815	0.200795	0.377778	1.80098	0.789954	0.911765	0.726027	0.0845921	0.00787402	1.29897	0.114391	3.25342	0.738197	2.55556	-0.10989	1.78448	0.117241	0.279012	1.01003	0.732759	0.077821	0.463132	0.232323	0.212893	2.01908	1.15345
605		0.0862944	0.0497132	0.102564	0.228777	0.144135	0.0733591	0.47561	0.0673077	0.103448	0.154613	0.150195	0.683544	-0.0117521	-0.0199637	1.37275	0.0787402	0.0987654	-0.0769231	1.23529	0.725714	0.265045	0.52862	-0.187302	0.154762	0.318284	1.93467	0.770787	0.506329	0.811111	0.0595298	0.0233863	0.75814	0.369811	3.13333	0.721239	1.52336	-0.185567	2.11554	0.741007	0.353014	1.05941	0.719149	0.120521	0.246812	0.367347	0.230939	1.79848	1.29834
606		0.128205	0.0216369	0.0275862	0.151472	0.0623782	0.10101	0.887324	-0.0653266	-0.0220264	0.0927703	0.117737	0.7	0.0505376	0.165692	1.29191	0.0618861	0.105485	0.0416667	1.49231	0.508571	0.238579	0.838028	-0.0952381	0.25	0.31358	1.72236	0.778291	0.871429	0.842697	0.120408	0.0189412	1.31868	0.334586	2.93443	0.803532	1.52174	-0.384615	2.12821	0.300699	0.386335	0.932642	0.658228	0.117377	0.417522	0.421053	0.199682	2.12992	1.37838
607		0.161616	-0.064695	0.0443038	0.176132	0.0758483	0.0478088	0.753623	-0.107843	0.0900901	0.102093	0.193935	0.84	0.0610687	0.045208	1.31538	0.0214425	0.197425	0.0386266	0.79288	0.703704	0.285199	0.469388	-0.279743	0.00746269	0.292383	1.73892	0.596491	0.716418	0.423256	0.0873494	-0.0130751	0.785714	0.247312	3.67391	0.778751	2.05	-0.184783	1.74242	0.626866	0.421836	1	0.820961	0.0889175	0.328185	0.428571	0.195366	2.33945	1.5961
608		0.0954774	0.0614948	0.170068	0.18408	-0.0123203	0.0526316	0.911765	0.181347	0.101124	0.129382	0.19462	0.852632	0.0454545	0.0328467	1.196	0.0640895	0.317697	0.0932203	1.00669	0.466667	0.318878	0.656566	-0.234727	0.198428	0.390244	1.72362	0.642202	0.724138	0.768889	0.141111	0.0741286	0.663366	0.188256	3.23913	0.729911	2.2619	-0.268817	1.73684	0.226277	0.324357	0.857143	0.684902	0.0625403	0.406326	0.305263	0.19396	2.10484	1.40108
609		0.115183	-0.0242991	0.305556	0.192931	0.10101	0.0309073	0.814286	-0.280374	0.139588	0.0790292	0.119691	0.672878	0.0750399	0.0333333	1.19184	0.0394338	0.218107	0.117773	1.02556	0.375	0.336709	0.537459	0.0652174	0.065666	0.285024	1.78392	0.689412	0.891473	1.10577	0.187243	0.067124	1.09412	0.262032	2.9934	0.803532	2.18182	-0.244444	2.10169	0.36	0.320341	1.17436	0.84106	0.0676787	0.310559	0.372973	0.226326	2.13934	1.34447
610		0.0852713	0.0462107	0.292517	0.264108	0.0542406	0.00784314	0.846154	0.00502513	-0.00865801	0.0539523	0.116805	0.823789	0.0142031	0.133333	1.3551	0.12426	0.225532	0.145877	0.993399	0.754601	0.359274	0.510067	0.0567376	0.144	0.3903	1.88557	0.714932	0.916084	0.929245	0.132616	0.019721	0.785714	0.279707	3.32982	0.750542	1.7907	-0.15508	1.72727	0.382353	0.310429	0.786802	0.675565	0.0718954	0.283931	0.287958	0.165942	1.67206	1.45383
611		-0.00759494	-0.0254477	0.255474	0.202287	-0.0935673	0.0669371	0.84	0.14	0.170404	0.00699301	0.169899	0.868365	0.0499177	-0.0309654	1.55814	-0.0479042	0.243802	-0.0609756	1.30605	0.491124	0.296588	0.509677	-0.237785	0.346072	0.338061	2.05371	0.723005	0.746479	0.754137	0.116736	0.0244141	1.0101	0.0857143	2.91202	0.70684	2.58904	0.039548	1.88412	0.558621	0.391198	1.15666	0.748373	0.134211	0.42233	0.312169	0.22992	2.11765	1.35638
612		0.0458221	0.0372493	0.0785714	0.214967	0.10515	0.167192	0.619718	-0.163265	0.137255	0.148173	0.116535	0.75	0.00442968	0.206107	1.48262	-0.0358875	0.183333	0.0669643	1.26715	0.783439	0.360208	0.583333	0.103704	0.271255	0.271028	1.77238	0.700224	0.68	1.05276	0.100735	0.0279001	1.09278	0.365854	3.69697	0.729668	1.82759	-0.101124	2.12446	0.384615	0.214371	1.199	0.566161	0.116218	0.365854	0.0108696	0.194583	1.9919	1.31579
613		0.127273	0.072381	0.0972222	0.107246	0.0995763	0.114851	0.940299	0.0707071	0.119469	0.0599078	0.142857	0.678715	0.0542466	0.224172	1.30952	0.106383	0.179167	0.0769231	0.935484	0.408284	0.403646	0.477707	0.0613718	-0.0094518	0.271028	1.81959	0.608889	1.07463	0.850117	0.0851506	0.0423892	0.532995	0.25	3.06757	0.83043	1.74725	0.0949721	1.81818	0.6875	0.352041	1.2439	0.759259	0.09652	0.379696	0.189744	0.22429	1.92308	1.04592
614		0.0206186	0.0199052	0.2	0.176985	0.0263692	0.055336	0.730496	-0.228426	0.143529	0.168968	0.196581	0.715464	-0.02537	0.144554	1.57996	-0.0296221	0.18239	-0.0505495	1.29893	0.566879	0.379845	0.657718	0.0533808	0.0893971	0.378313	1.72319	0.388889	0.647887	0.817734	0.0943005	-0.0194774	0.663366	0.176895	2.88997	0.828249	2.15663	0.027933	1.89627	0.51145	0.313208	1.31746	0.820175	0.118141	0.356042	0.272727	0.185208	2.41277	1.41398
615		0.0946292	-0.0131579	0.0096463	0.16532	0.0148075	0.107884	0.972222	-0.172414	0.153153	0.169637	0.137771	0.920705	0.0573593	0.0669145	1.50204	-0.037037	0.152401	0.0956522	0.925424	0.65	0.247177	0.605442	0.0763889	0.286004	0.333333	1.98953	0.649289	0.426667	0.832558	0.125259	0.0647202	0.811881	0.445283	3.73333	0.784922	1.59341	-0.15508	2.03509	0.590164	0.28589	0.815603	0.701299	0.0746269	0.373899	0.382979	0.191269	1.83333	1.50556
616		0.129771	-0.0523311	0.184669	0.200293	0.170286	0.084	0.577465	-0.0334928	-0.0109409	0.0699804	-0.00856031	0.487288	0.0526316	0.0909091	1.58174	0.0131181	0.145263	-0.0412148	1.17568	0.6875	0.225248	0.78157	-0.00729927	0.122951	0.330166	2.02757	0.684932	0.315789	0.847162	0.116328	0.0362144	0.690141	0.316176	2.82524	0.629393	1.20408	-0.289617	2.01205	0.411765	0.382843	1.01527	0.859729	0.123506	0.568574	0.106145	0.214141	1.6748	1.41111
617		0.21875	-0.0268199	0.111864	0.211144	0.11292	0.0416244	0.668966	0.319149	0.0313901	0.108857	0.2384	0.899582	0.0816213	0.160494	1.39419	-0.0756972	0.2827	-0.0171674	1.1512	0.692308	0.247475	0.619672	-0.177474	0.350318	0.174312	2.02375	0.578704	0.539474	0.672811	0.163406	0.0885827	0.786408	0.238779	3.2549	0.764324	2	-0.172414	2.01626	0.602837	0.384813	0.95466	0.680525	0.144364	0.284516	0.261364	0.173128	1.8374	1.26913
618		0.183333	-0.0833333	-0.00343643	0.17768	0.0718816	0.0588235	0.441176	-0.0341463	0.058296	0.13624	0.127832	0.765957	0.0380739	0.139098	1.40157	0.0520833	0.178947	-0.00423729	1.50883	0.986577	0.305556	0.547945	-0.159864	0.12831	0.36342	1.95116	0.520737	0.328859	0.726852	0.142416	0.072549	0.957447	0.355805	3.10309	0.737773	2.28947	-0.145833	1.76151	0.699248	0.258809	1.1383	0.593819	0.115762	0.605313	0.213115	0.176099	2.38136	1.60519
619		0.21134	-0.0308123	0.258741	0.239458	0.0798403	0.0851735	0.784173	0.161616	0.110619	0.0722733	-0.0263753	0.556452	0.00437158	0.152542	1.27006	-0.0219436	0.369565	-0.0383838	1.28975	0.874214	0.243902	0.609428	0.0391459	0.2625	0.273148	2.12601	0.812646	0.732394	1.15942	0.134545	0.0653659	0.862434	0.275046	3.02632	0.657388	1.82105	-0.25	1.71815	0.613793	0.395522	0.94898	0.848889	0.100196	0.201842	0.423729	0.160012	1.70683	1.37158
620		0.240793	-0.0116054	0.297101	0.16679	-0.15016	0.0239833	0.518987	0.010101	0.109049	0.0615486	0.101777	0.88412	0.0281849	0.0841121	1.2495	0.0368764	0.131004	0.0611354	1.16197	0.616279	0.254902	0.514085	0.122807	0.095723	0.375	1.94026	0.591549	0.585185	0.873832	0.0877743	0.057393	0.447964	0.263551	3.1843	0.6931	1.23256	-0.111111	2.44545	0.352113	0.462687	1.07732	0.76652	0.125246	0.52015	0.455556	0.16231	1.74678	1.36842
621		0.148352	0.0431373	0.202952	0.146647	0.0875764	0.0754516	0.832061	-0.026738	0.260143	0.109312	0.170651	0.72973	0.00948132	0.0839695	1.61895	0.110651	0.218684	-0.030303	1.23485	0.763158	0.311111	0.721429	-0.0627306	0.127883	0.316708	2.17772	0.725768	1.11111	0.805226	0.126265	0.00384246	0.664975	0.319703	3.08178	0.791111	2.075	-0.318681	1.96552	0.0580645	0.40399	1.14607	0.559395	0.0519481	0.324779	0.233333	0.171269	1.93694	1.03836
622		-0.029703	-0.0861568	0.238754	0.194007	0.156284	0.0827068	1.33846	0.0485437	0.303922	0.0496644	0.0624	0.845824	0.0757062	0.0951456	1.33198	0.0222222	0.190776	-0.062635	1.43446	0.505882	0.352185	0.41806	-0.297297	0.142276	0.406863	1.88432	0.649533	0.829787	0.712941	0.121544	0.0675147	1.13187	0.241252	3.29577	0.896861	2.64557	-0.322581	2.13778	0.153846	0.292383	0.864865	0.852018	0.119048	0.489362	0.314607	0.246446	2.18919	1.29379
623		0.276243	0.0116279	0.013986	0.15516	0.0687885	0.0980392	0.927536	-0.124378	0.301149	0.142098	0.120567	0.907173	0.0426487	-0.026616	1.46278	-0.0225873	0.342048	0.0258621	0.971731	0.94702	0.233831	0.794872	-0.214286	0.108481	0.384236	2.05263	0.722864	0.659864	0.900744	0.140625	0.0569589	0.946809	0.264493	3.49057	0.708889	2.23404	-0.238579	1.82677	0.136986	0.22503	1.25405	0.731544	0.114997	0.349259	0.348066	0.225343	1.99187	1.13882
624		0.0952381	-0.015873	0.154122	0.210326	-0.147752	0.131579	0.534884	-0.131313	0.295238	0.160615	0.169002	1.00458	0.016156	0.0633397	1.59794	0.0285111	0.130435	0.0884956	1.12752	0.84106	0.289673	0.410596	-0.0217391	0.186441	0.299517	2.37158	0.535885	0.688889	0.657957	0.140065	0.0418926	1.13542	0.193974	2.8386	0.822581	2.31707	-0.011236	2.24651	0.56391	0.436693	1.11168	0.784897	0.138647	0.541016	0.172043	0.224885	2.01304	1.64865
625		0.0971129	-0.116981	0.263538	0.199702	0.236402	-0.00206612	0.622378	0.0466321	0.199017	0.135582	0.113452	0.762864	0.0542809	0.108055	1.65179	-0.0184426	0.202643	0.0745614	1.16495	0.682119	0.319095	0.874126	0.186312	0.00425532	0.282555	1.98133	0.80198	0.937008	0.710843	0.0959956	0.0485056	0.845361	0.456929	2.92226	0.665608	1.88889	-0.237569	2.26168	0.552239	0.362963	0.995025	0.903448	0.144011	0.318427	0.242938	0.214159	1.8	1.23392
626		0.141361	0.00584795	0.272085	0.119589	0.100446	0.027027	0.350993	0.0851064	0.147903	0.0921691	0.123994	0.948608	0.0394144	0.0496183	1.19794	-0.016444	0.352809	0.00656455	1.21831	0.337423	0.290241	0.59589	-0.300676	0.14405	0.323877	2.14905	0.779376	0.594937	0.743719	0.132281	0.0414201	0.978022	0.268657	3.28772	0.775306	2.37209	-0.358289	2.17051	0.39726	0.415617	1.03491	0.713636	0.151392	0.549852	0.125	0.232661	1.62651	1.12332
627		0.2	0.102747	0.154122	0.110443	0.194185	0.0373533	0.984127	0.0793651	0.0366972	0.10221	0.163636	0.910314	0.0499719	0.0936902	1.65801	0.0280957	0.362637	-0.0175439	1.22628	0.771812	0.385806	0.573427	-0.0869565	0.253165	0.340153	1.88889	0.661098	1.25424	1.00752	0.0965005	0.0185464	0.946524	0.306667	2.96	0.590604	2.325	-0.325843	1.77056	0.504	0.314143	1.18519	0.809745	0.118046	0.298496	0.255556	0.260237	1.83607	1.30337
628		0.144444	-0.00792079	0.190311	0.179173	-0.173536	0.0617551	0.363636	0.214286	0.272727	0.0985325	0.104884	1.00477	0.030951	0.0775194	1.47228	-0.0711382	0.19403	0.171296	1.39416	0.477124	0.275731	0.602837	-0.265018	0.12369	0.38191	2.2118	0.668269	0.771429	0.708235	0.128962	-0.00953337	0.746341	0.26195	2.54667	0.720779	2.08861	-0.129032	2.15966	0.614815	0.337531	0.943005	0.92399	0.136486	0.615226	0.363128	0.214309	1.86561	1.36461
629		0.0652174	0.0375635	0.183824	0.158892	0.142576	0.0899358	0.571429	-0.0456853	0.175644	0.063655	0.158654	0.858447	0.0842956	0.0716981	1.12133	-0.0505676	0.219512	0.110599	0.550336	0.716129	0.310881	0.651568	-0.0681818	0.229508	0.222989	2.09551	0.833333	0.909091	0.619753	0.147752	0.076006	0.967742	0.352941	2.81013	0.721382	2.60976	-0.0930233	2.06494	0.572519	0.185629	1.14477	0.737089	0.133697	0.243981	0.208791	0.240952	2.11864	1.50142
630		0.195652	-0.0263158	-0.057554	0.160568	0.0960452	-0.104686	0.470968	-0.130435	0.0444965	0.0238582	0.183871	0.829694	0.0441094	0.210526	1.51193	-0.0306435	0.263158	-0.00888889	1.15331	0.464286	0.228608	0.870504	0.130435	0.127572	0.274882	1.96104	0.47619	0.883212	1.02206	0.118059	0.10619	0.6	0.376181	3.16	0.789123	2.42857	-0.248619	2.05085	0.152778	0.299363	1.09424	0.819444	0.131271	0.594146	0.108696	0.21473	1.97391	1.53221
631		-0.026178	0.0670795	0.194139	0.204633	-0.149068	-0.0421941	0.736111	-0.00518135	0.0045045	0.133667	0.168595	1.0274	-0.00224215	0.0656064	1.7033	0.131303	0.394366	-0.062635	1.0396	0.423077	0.286641	0.482014	-0.231618	0.221739	0.138015	2.45404	0.756098	1.01493	0.521327	0.042735	0.0816428	0.923077	0.339695	3.5019	0.881564	2.41026	-0.147368	2.24299	0.496063	0.387909	1.26425	0.862884	0.0779944	0.280381	0.0869565	0.230419	1.42471	1.43429
632		0.0575916	-0.0354331	0.0724638	0.186012	0.00619835	0.0669546	0.808824	-0.0505051	0.0214797	0.0916844	0.210308	0.634888	0.0328909	0.180583	1.4859	-0.034034	0.389522	-0.0580645	1	1.02703	0.282051	0.653061	0.34902	0.275862	0.341772	2.44693	0.713615	0.555556	0.596107	0.113391	0.0644997	1.01105	0.40668	2.48	0.825112	2.39474	0.0843373	1.99582	0.577236	0.43883	1.0829	0.730337	0.147018	0.562332	0.134503	0.20286	1.66109	1.59941
633		0.15847	-0.0306022	0.115242	0.166417	-0.0445795	0.0663765	0.480916	0.315217	0.125891	0.0618132	0.212479	0.886878	0.034405	0.0901639	1.2906	0.0385819	0.291196	-0.0151188	1.16236	0.590361	0.288265	0.553903	-0.239583	0.182573	0.336562	2.0989	0.678322	0.653846	0.83908	0.0875527	0.0372208	0.978495	0.317269	2.5641	0.789238	1.80899	-0.178378	2.17857	0.372263	0.367609	1.32708	0.600939	0.222146	0.254717	0.54023	0.194395	1.96491	1.33241
634		0.159341	-0.126844	0.0391459	0.121326	0.181532	0.076412	0.708029	-0.02	0.209302	0.107042	0.0885029	0.72949	0.0294118	0.103175	1.42857	0.0532787	0.273128	0.0972222	1.35249	0.839506	0.231754	0.592982	-0.159722	0.221757	0.452736	2.15054	0.746193	1.07353	0.513002	0.132075	0.0213188	0.765957	0.381044	2.85616	0.834452	2.2	-0.144444	2.10798	0.597222	0.432718	1.28022	0.62201	0.0952381	0.594961	0.0909091	0.212987	2.08085	1.46857
635		0.0025974	0.0616785	0.11828	0.114679	0.08	0.022605	0.366197	-0.108696	0.00677201	0.163482	0.177759	0.651786	-0.0169683	0.0393701	1.14604	-0.0524109	0.412027	-0.0572687	1.35391	0.75	0.287417	0.692308	-0.207143	0.0951374	0.383085	2.13904	0.664198	1.07752	0.816832	0.131707	0.100202	1.07527	0.381605	3.1223	0.747323	1.74419	-0.258065	1.56303	0.612903	0.291925	1.28415	0.791667	0.112959	0.289474	-0.0497238	0.204135	2.04545	1.35422
636		0.147453	-0.0292969	0.0780669	0.134373	0.00104712	0.040349	0.685714	0.0348837	0.167442	0.145104	0.167785	0.734234	0.057243	0.176238	1.44144	0.13099	0.293065	0.0246085	1.24221	0.794872	0.340511	0.466667	-0.0191571	0.287912	0.326531	2.04167	0.608911	1.13433	0.89	0.109244	0.115207	0.659794	0.275591	3.07194	0.836506	1.59259	-0.242938	2.4686	0.553719	0.359795	1.31688	0.706024	0.128967	0.310569	0.0710383	0.208313	1.95359	1.31214
637		0.173333	-0.0879541	0.125	0.182595	0.17861	-0.00647948	0.848276	0.0505051	0.148936	0.0715268	0.171334	0.817352	0.0127315	0.0592734	1.3914	0.0653595	0.316397	-0.184382	1.27119	0.42515	0.22649	0.589928	0.0384615	0.292632	0.403509	2.0229	0.733333	1.01389	0.786408	0.140011	0.0696742	0.925926	0.411765	2.36977	0.826652	2.1358	-0.242938	1.9845	0.0684932	0.380892	1.42308	0.851675	0.0835088	0.360331	0.290698	0.221823	1.60163	1.20225
638		0.0953678	0.0136719	0.238462	0.151927	0.175589	0.102845	0.888889	0.0206186	0.148515	0.0674237	0.162365	0.925926	0.0143926	0.0931174	1.51641	0.017801	0.197368	-0.217949	1.13534	0.641026	0.224599	0.351916	-0.361314	0.230108	0.483544	2.507	0.742718	1.14085	0.665835	0.0938511	0.055668	0.75419	0.450505	3.40476	0.990676	1.09091	-0.154762	1.92116	0.338462	0.289172	1.08312	0.698376	0.146392	0.238095	0.123596	0.189857	1.95455	1.26934
639		0.236769	0.0267062	0.185185	0.168317	0.177384	0.0640177	0.729323	-0.09375	0.056872	0.124098	0.109646	0.861915	-0.00114548	0.0426357	1.37908	0.028169	0.393103	-0.0615385	1.08481	0.690323	0.286842	0.717391	0.160305	0.193548	0.328502	2.13873	0.535802	0.838926	0.832099	0.170945	0.0732714	1.0113	0.347741	3.05714	0.751351	1.96471	-0.369565	2.30189	0.318182	0.303457	1.2058	0.894484	0.149233	0.279107	-0.0729167	0.236303	1.83051	1.375
640		0.128609	0.04	0.246032	0.157895	0.0585774	0.0534351	0.776119	0.122995	0.134474	0.0746918	0.16765	0.851685	-0.0148571	0.146293	1.38681	0.132837	0.280353	-0.0179372	1.09774	1.02532	0.348525	0.275261	0.132812	0.239915	0.410579	2.2687	0.760599	0.459854	0.744472	0.0879655	0.0697201	1.0339	0.248092	2.97826	0.974654	2.02703	-0.325581	1.96552	0.144928	0.492537	1.04167	0.836538	0.0869565	0.547025	0.231638	0.257722	1.58091	1.44444
641		0.240437	0.0423645	0.330769	0.128983	0.0944206	0.127396	0.832168	-0.10989	0.105263	0.0529369	0.111297	0.929907	-0.000578369	0.147122	1.42194	-0.0660277	0.24	0.111617	1.04181	1.12162	0.269283	0.450704	0.0793651	0.232704	0.419689	1.99471	0.771144	0.985612	0.766749	0.0471034	0.0309381	0.94186	0.41556	3.34483	0.933714	2.28947	-0.0502793	2.19651	0.4	0.393464	1.1658	0.859485	0.0386965	0.35095	0.217877	0.254711	2.13636	1.4023
642		0.327824	0.0136452	0.210332	0.161241	0.1	0.0345572	0.811594	0.382979	0.161446	0.095791	0.129195	0.726027	-0.0262697	0.198347	1.50209	0.179039	0.342857	0.034965	1.28253	0.861635	0.256445	0.591241	-0.40493	0.227557	0.526316	2.15989	0.639723	1.0916	0.618812	0.0973355	0.0520465	0.548077	0.399594	3.51493	0.914286	1.84091	-0.114943	2.38793	0.473684	0.441176	1.19307	0.657407	0.171108	0.349233	0.481081	0.186273	2.12389	1.2931
643		0.220994	-0.0172239	0.109489	0.208106	0.0422245	-0.0011274	0.772727	-0.0366492	0	0.0305981	0.197978	0.62963	-0.0162413	0.138776	1.48124	0.10742	0.385681	-0.0630631	1.12996	0.757962	0.234807	0.784387	-0.214286	0.195021	0.413882	1.91003	0.650246	1.0274	0.837037	0.152693	0.115325	0.722222	0.142857	2.95775	0.895336	2.33333	-0.0295858	2.17949	0.798319	0.352785	1.10899	0.818616	0.049291	0.188088	0.512195	0.219104	2.23478	1.53211
644		0.0578947	-0.043222	0.133333	0.109422	0.0170576	0.0519187	0.908397	-0.0659898	0.120192	0.0840989	0.16214	0.907834	-0.030543	0.251613	1.34077	0.0309498	0.233645	-0.132159	1.34981	0.896104	0.232404	0.569966	-0.0620155	0.227557	0.312821	1.95676	0.759804	1.25185	0.910995	0.158827	0.0715726	0.608696	0.274131	3.16418	0.829021	1.6747	-0.337017	2.35238	-0.146853	0.325521	1.17662	0.701923	0.0855978	0.617272	0.0537634	0.240663	2.05579	1.44648
645		0.21547	-0.0257426	0.25	0.183142	0.0186813	0.0482604	0.7	0.0857143	0.235	0.0580014	0.139435	0.7921	0.0177096	0.114754	1.29661	0.0381679	0.293578	-0.0636364	1.55422	0.43949	0.317139	0.690037	0.190283	0.285106	0.311224	2.2507	0.696203	1.15385	0.550239	0.118399	0.00101112	1.36686	0.398406	3.07246	0.865639	2.15789	-0.0114943	2.31004	0.409836	0.384	1.20207	0.79759	0.0679612	0.448158	0.34104	0.176933	1.86726	1.60479
646		0.240223	0.0281124	0	0.198753	0.0981257	0.0604027	0.171429	0.0857143	0.122549	0.115656	0.212892	0.725581	0.0112227	0.104294	1.42526	-0.0889831	0.430657	-0.0502283	1.02222	0.946667	0.212938	0.763359	-0.295019	0.211087	0.321867	2.32203	0.818182	0.71831	0.861183	0.0455794	0.111795	0.769231	0.379592	3.84211	0.919463	1.87179	0.0666667	2.56522	0.375	0.385827	1.47826	0.570439	0.0724044	0.374472	0.0659898	0.208686	1.47876	1.15169
647		0.194444	0.0425321	0.320312	0.175719	-0.0455992	0.0969267	0.79562	-0.0744681	0.226601	0.170767	0.167763	0.865116	0.0105758	0.167364	1.38806	-0.0658174	0.263658	0.170616	1.28571	0.838509	0.287449	0.709091	0.108434	0.238095	0.362963	2.27528	0.516908	0.870504	0.74359	0.152993	0.0517241	0.540816	0.333333	3.29304	0.787978	0.97619	-0.284091	2.06608	0.545455	0.356475	1.16244	0.748815	0.128571	0.570131	0.152174	0.179624	2.18692	1.32464
648		0.29443	-0.0276134	0.166667	0.248438	0.0269687	0.0640177	0.804511	0.21547	0.152225	0.0911661	0.170483	0.895262	-0.0419781	0.0559006	1.16566	-0.0891515	0.333333	-0.0190476	1.29963	0.9375	0.26162	0.639706	0.0727969	0.0939457	0.602067	2.20541	0.725389	0.985915	1.055	0.120133	0.12753	1.03243	0.394309	2.69395	0.861048	1.51685	-0.0299401	2.09174	0.482517	0.441489	1.19689	0.653933	0.120787	0.381224	0.218935	0.1346	1.93103	1.28255
649		0.138211	0.127083	0.155894	0.208464	-0.027957	0.0783626	1.01504	0.0702703	0.303704	0.0126939	0.0797649	0.990196	0.041987	0.107071	1.33051	-0.00756757	0.382775	0.0167064	1.52985	1.11111	0.30068	0.457143	0.188285	0.237323	0.492147	2.22485	0.606965	0.80303	0.460396	0.12812	0.0625	1.05682	0.338583	3.28044	0.945303	1.83146	-0.2	2.04505	0.504274	0.400821	1.5043	0.809291	0.0898797	0.412796	0.273743	0.114733	1.8821	1.36747
650		0.322129	-0.0225873	0.291339	0.135303	0.078125	0.121788	0.866667	-0.15	0.415144	0.122419	0.190111	1.02519	-0.0404624	0.0730689	1.19691	0.0196507	0.371429	-0.0305882	0.912727	0.708861	0.418283	0.627586	0	0.301927	0.472296	2.184	0.753086	1.35938	0.952632	0.0793472	0.130298	0.768421	0.173333	2.85075	0.979405	2.10811	-0.151163	1.89083	0.472868	0.355438	0.94132	0.469194	0.0294722	0.216495	0.116022	0.261315	2.16129	1.30471
651		0.195467	0.0242915	0.225296	0.192126	-0.0192963	0.0391705	0.868852	0.0549451	0.194805	0.0945055	0.138796	0.752381	-0.0221963	0.157205	1.27165	0.0422993	0.321185	-0.0541176	1.25092	0.857143	0.301887	0.419118	-0.387097	0.300847	0.33	2.28902	0.643564	1.0303	1.02674	0.113345	0.0689476	0.704918	0.345309	3.07143	0.786996	2.40541	-0.0928962	2	0.283333	0.228304	1.06045	0.751244	0.0186667	0.603922	0.393939	0.237795	1.79352	1.22841
652		0.119565	0.137421	0.0814815	0.119497	0.045505	0.0763968	0.925373	0.117021	0.18481	0.0404542	0.074199	0.985915	0.0334703	0.0619835	1.37603	-0.136706	0.290168	-0.0603248	1.09286	0.945578	0.362784	0.577465	0.120623	0.2375	0.454545	2.16216	0.590588	1.13889	0.680798	0.156708	0.110542	1	0.415323	2.31707	0.931973	1.80488	-0.045977	2.27885	0.358209	0.378197	1.33787	0.738095	0.170592	0.30384	0.204545	0.239456	1.91071	1.08719
653		0.146006	0.0154799	0.234848	0.219667	-0.0244421	0.0909091	0.609023	-0.188889	0.104859	0.105951	0.222318	0.886256	-0.0459035	0.12831	1.33954	-0.0399137	0.216346	0.137845	1.31128	0.8125	0.320548	0.507353	-0.286232	0.327586	0.416667	2.25	0.621891	0.878378	1.03618	0.134477	0.0846588	0.913514	0.239604	2.87986	0.859609	1.02174	-0.0689655	2.00426	0.492063	0.317872	1.18182	0.616307	0.133287	0.357576	0.238636	0.215475	2.16746	1.04444
654		0.20339	0.0782241	0.11194	0.226324	0.0588235	0.124122	1.03306	-0.0847458	0.281501	0.00286533	0.0810811	0.644944	0.0900302	0.190678	1.32017	-0.0185792	0.275294	0.0939759	1.18727	1.05634	0.396067	0.424561	0.133333	0.235043	0.446809	2.16527	0.84	1.28571	1.01575	0.0570801	0.0263425	0.849711	0.311871	3.47059	0.943662	2.8806	-0.227273	2.56075	0.515625	0.381963	1.29891	0.629977	0.0517483	0.378378	0.152941	0.252868	1.81818	1.23563
655		0.120219	0.0461538	-0.013986	0.14791	-0.00328587	0.0315315	0.875	0.0430108	0.278772	0.0605845	0.112769	0.759434	-0.0934685	0.122363	1.48322	-0.0376749	0.3125	-0.0458716	1.28682	1.03974	0.306452	0.772152	-0.266917	0.0702479	0.342175	1.9375	0.805	0.875969	0.665835	0.0795964	0.13775	0.96648	0.375	3.70866	0.882353	2.15789	-0.195531	2.66019	0.794393	0.445682	1.16489	0.647059	0.158562	0.361558	0.55	0.209902	1.65272	0.994236
656		0.311111	-0.0661157	0.047619	0.203213	-0.0202343	0.0979929	0.617647	-0.139785	0.218509	0.0563798	0.14527	0.651214	0.0158544	0.144105	1.57079	-0.0981661	0.202864	0.176471	0.880282	0.54717	0.303523	0.60424	0.115702	0.345212	0.460733	2.1405	0.777215	1.14815	0.770992	0.219619	0.0655067	0.709497	0.338776	3.35766	0.780093	0.208791	-0.0285714	2.29858	0.533333	0.299728	1.32153	0.699284	0.0748396	0.362543	0.522013	0.179239	1.66071	1.40606
657		0.17847	0.0617021	0.315385	0.197368	0.0388769	0.0509259	1.09524	-0.318919	0.247423	0.0886628	0.208547	0.980488	-0.0405167	0.0720339	1.4574	-0.0337079	0.382716	0.00913242	1.29688	0.7875	0.331551	0.492754	0.0634921	0.244161	0.494681	2.36963	0.967828	0.859155	0.875	0.12452	0.0566234	0.681319	0.302144	2.93358	0.838317	1.58537	-0.252874	1.98592	0.692308	0.383152	1.32687	0.726415	0.0845987	0.520603	0.0949721	0.221532	1.9417	1.33333
658		0.139601	0.0507726	0.263158	0.0832672	0.0288248	0.0202703	0.72093	-0.0574713	0.232432	0.0247093	0.132879	0.91198	-0.0268692	0.234043	1.62946	-0.0347924	0.112676	-0.0482759	1.30075	0.8	0.296	0.528169	0.353712	0.281046	0.433071	2.12921	0.717949	1.27419	0.772727	0.181818	0.0635659	0.892473	0.316667	2.92883	0.995204	1.97561	-0.321839	2.27442	0.375	0.440329	1.40449	0.680952	0.19797	0.147436	0.235955	0.176671	2.54315	1.01117
659		0.140541	-0.0307018	0.15873	0.155158	0.0479376	0.0447427	0.983871	-0.0594595	0.255102	0.0326323	0.119866	0.836449	0.0523187	0.109731	1.69504	0.0342541	0.136986	0.076555	1.42742	0.575758	0.396333	0.583942	0.0756972	0.376682	0.282828	2.46386	0.738499	0.805556	0.739348	0.139913	0.0358767	0.922652	0.297505	2.83212	0.826474	1.78481	-0.117647	1.82667	0.625	0.487324	1.35457	0.661017	0.140998	0.437276	0.381215	0.167911	2.54639	1.57585
660		0.377522	0.064764	0.322957	0.154157	0.0873786	0.0988235	0.602837	-0.222222	0.191283	0.0669578	0.111489	0.90676	-0.0568522	0.247934	1.41423	-0.0136986	0.270642	-0.149038	1.24903	0.72028	0.348252	0.5	0.109312	0.307856	0.403061	1.95935	0.585	1.33333	0.881188	0.1441	0.0814196	0.944751	0.293413	3.02256	0.868778	1.73333	-0.468208	2.14019	0.428571	0.447514	1.32376	0.486111	0.0977337	0.367635	0.438596	0.213592	2.01786	1.15297
661		0.258427	0.0430939	0.146067	0.113965	0.0141458	0.11188	0.410072	0.0113636	0.243108	0.0131387	-0.205255	0.811765	-0.0184195	0.10559	1.2582	0.00340522	0.363636	0.158654	1.40458	0.92053	0.340974	0.637037	0.292683	0.310044	0.305825	2.36313	0.552764	1.41538	0.924528	0.148209	0.0800843	0.764045	0.398374	3.20532	0.951106	2.02632	-0.0232558	2.17808	0.671875	0.455048	1.44568	0.7109	0.107091	0.674027	0	0.149533	1.82979	1.29738
662		0.297143	-0.00552486	0.169811	0.21862	0.164144	0.0447761	0.328244	0.19774	0.298765	0.0447542	0.18569	0.955112	-0.0304114	-0.115619	1.32207	-0.113025	0.387471	0.038835	1.36782	1.13889	0.360465	0.629893	0.217391	0.334755	0.415789	2.23977	0.712159	1.06349	1.05208	0.0965556	0.0235479	0.9375	0.394683	3.30769	0.928899	1.82927	-0.060241	2.41232	0.688525	0.453039	1.35294	0.745098	0.0348754	0.301084	0.298246	0.12358	1.77586	1.33929
663		0.232558	0.0810211	0.00401606	0.139665	0.179287	-0.101617	0.856115	-0.119565	0.187192	0.0443131	0.118787	0.956416	-0.0041841	0.178808	1.53219	0.0398126	0.182898	0.00686499	1.61017	0.442424	0.349782	0.581749	0.251101	0.387755	0.618529	2.38776	0.787798	0.837037	0.738462	0.093873	0.0142031	0.855556	0.258687	3.50199	0.852874	1.8642	-0.212121	2.17703	1	0.463687	1.51913	0.645977	0.166185	0.33959	0.333333	0.254641	2.10185	1.23729
664		0.309942	0.0872027	0	0.221945	0.111111	0.080326	0.30303	-0.123596	0.257618	0.100147	0.117851	0.759637	-0.00715137	0.0555556	1.30928	-0.0227531	0.22673	0.0119904	1.20077	0.971014	0.384835	0.732824	0.0864198	0.375281	0.264	2.30636	0.628499	0.861111	0.990099	0.15625	-0.0345912	1.38323	0.371938	3.22711	0.908451	1.69333	-0.0843373	2.01869	0.837398	0.44089	1.53786	0.522936	0.16932	0.286432	0.195266	0.20889	2.15566	1.39429
665		0.319767	0.104	0.0909091	0.164228	0.131004	0.0976744	0.284672	0.0470588	0.187661	0.104609	0.101201	0.956731	0.0202622	0.0762527	1.37584	-0.00548847	0.391304	0.103118	1.17712	0.605263	0.319027	0.626374	0.107692	0.358744	0.394595	2.36416	0.89418	0.673203	0.792208	0.141899	-0.0438871	0.734807	0.31677	3.02974	1.16646	1.06452	-0.0111111	2.10811	0.844828	0.346424	1.56322	0.578947	0.145401	0.403325	0.239264	0.181896	1.91284	1.63253
666		0.16035	0.141884	0.0775194	0.219064	0.234705	0.0471807	1.35484	-0.0538922	0.26087	0.0323044	0.0497051	1.07692	-0.0339084	0.107822	1.44393	-0.105843	0.224018	-0.00729927	1.12977	0.79085	0.492582	0.671642	0.0464135	0.400901	0.436997	2.14286	0.726804	1.27869	0.809524	0.13867	0.0739176	0.702128	0.282787	3.57265	0.940191	1.55814	-0.185629	2.47826	0.360656	0.316285	1.46893	0.734644	0.161765	0.335565	0.173184	0.190691	1.7931	1.24118
667		0.362832	0.132743	0.409836	0.152709	0.326966	0.0823529	0.808824	-0.0117647	0.172043	0.0737765	0.0951557	1.06533	0.0643985	0.0692641	1.26891	0.00669643	0.44335	0.00930233	1.62762	0.691358	0.418605	0.615094	-0.0687023	0.431111	0.473404	2.34091	0.712082	1.01449	0.896373	0.0787809	0.128314	0.921348	0.240987	3.19455	0.938389	1.34783	-0.318681	1.95238	0.370629	0.561254	1.12672	0.894737	0.122524	0.35248	0.280488	0.241819	2.02752	1.38006
668		0.247813	0.0886644	0.04	0.168483	0.188827	-0.030303	0.693548	-0.183432	0.28022	0.0722543	0.133391	1.05797	-0.0167464	0.111579	1.44934	0.00803674	0.24424	0.0192308	1.33735	1.17266	0.326619	0.740157	-0.0423729	0.295117	0.434903	2.09551	0.896739	1.17647	0.844221	0.140599	0.0083682	1.16667	0.24109	3.60169	0.971084	1.86747	-0.295455	2.3561	0.508197	0.405184	1.30189	0.666667	0.0871722	0.38587	0.361446	0.237826	2.17512	1.39009
669		0.249284	0.0992196	0.398438	0.156118	0.222844	-0.0422535	0.358209	0.0898876	0.173127	0.139623	0.0846287	0.816514	0.0137478	0.197425	1.33118	0.12065	0.31358	0.101655	1.15504	0.858156	0.338109	0.411765	0.110204	0.16	0.47561	2.03152	0.81768	1.25564	0.854637	0.134857	0.0205155	0.785311	0.222453	3.30705	1.04872	1.73684	-0.133758	2.0211	0.790323	0.468208	1.31016	0.623256	0.158754	0.332766	0.26087	0.233834	1.76923	1.2561
670		0.215116	-0.0284464	0.314741	0.250842	0.200224	0.0457831	0.404255	-0.264249	0.192513	0.0695266	0.110333	0.990025	0.0236407	0.121212	1.26947	0.0197445	0.300733	0.0330789	1.3786	0.605096	0.459701	0.696498	-0.0290456	0.309255	0.430894	2.24571	0.643979	0.96875	0.870466	0.0996016	0.0442571	0.78022	0.31524	3.59919	1.13625	2.08861	0.0318471	2.33962	0.752066	0.426612	1.28022	0.675	0.205521	0.2827	0.292683	0.27716	1.7619	1.2263
671		0.289552	0.144144	0.241935	0.221106	0.108352	0.0450237	1.01639	-0.0666667	0.320225	0.0803571	0.151042	1.10633	0.0173134	0.167756	1.31042	0.00225734	0.38806	0.0434783	1.14232	0.906667	0.341007	0.604839	0.163793	0.107296	0.659639	2.36873	0.932961	1.35897	0.724138	0.146805	0.0921538	0.844311	0.379015	3.15493	1.0024	2.40845	-0.0853659	2.26923	0.735537	0.47139	1.24932	0.658291	0.0835777	0.354784	0.235294	0.251284	1.91266	1.42566
672		0.209302	-0.0702128	-0.00775194	0.245123	0.149826	0.0854392	1.25806	-0.221053	0.225464	0.0675676	0.135325	0.928571	-0.0539273	0.2	1.36283	-0.105145	0.450122	0.0757576	1.44828	0.214286	0.391304	0.70229	0.238494	0.337808	0.646526	2.27381	0.966667	1.1746	0.963446	0.192084	0.0896328	0.813953	0.333333	3.26562	0.943728	2.42424	-0.137931	2.40816	0.566667	0.441261	1.13714	0.692671	0.109783	0.332756	0.376471	0.241195	1.61682	1.31361
673		0.296703	-0.123548	0.2	0.18593	0.303911	0.0407451	0.684211	0.05	0.278515	0.0602782	0.101724	0.681928	0.00479616	0.103139	1.41739	0.00923788	0.165432	0.112195	1.34263	0.848276	0.437967	0.48	0.247788	0.352679	0.433243	2.07018	0.831522	1.16393	0.675258	0.154472	0.0766773	0.411111	0.435583	3.32941	1.02864	1.94118	-0.365854	2.47	0.316239	0.470504	1.22099	0.654321	0.18417	0.357205	0.202381	0.257485	1.87111	1.48254
674		0.11413	-0.0367893	0.195312	0.123103	0.122449	0.0705882	0.646154	0.0751445	0.159794	0.0938215	0.0703259	0.874396	-0.016534	0.136465	1.35244	0.0606768	0.249406	0.105263	1	0.626667	0.370102	0.0759076	-0.165414	0.216667	0.644377	2.16949	0.932394	0.942029	1.01326	0.167059	0.0609626	1.02326	0.224319	2.78358	0.943662	2.59375	-0.283237	2.73469	0.114504	0.495702	1.27507	0.81592	0.121809	0.353448	0.0769231	0.235252	1.66968	1.38608
675		0.297619	-0.0543478	0.434426	0.242502	0.143805	0.0183486	0.689922	-0.252874	0.119792	0.0202551	0.0775789	0.752969	0.0769231	0.138528	1.34034	-0.0138249	0.536946	-0.0330189	0.923954	0.738562	0.289773	0.627737	0.0202429	0.365854	0.264865	1.95732	0.931429	1.21667	0.665768	0.0857788	0.0441176	0.806452	0.349896	4.07296	0.940618	2.51515	-0.209877	2.24883	0.424	0.565982	1.0489	0.630923	0.0751276	0.430865	0.248485	0.246868	1.74439	1.21493
676		-0.0331492	-0.00110988	0.317073	0.219306	0.102596	0.0752688	0.886179	-0.0449438	0.313187	0.0237184	0.162667	0.910995	0.0206061	0.0409091	1.8381	-0.0772676	0.360382	0.031477	1.23622	1.25899	0.326619	0.75969	-0.00840336	0.372294	0.148936	2.09302	0.750678	1.13333	0.725191	0.183862	0.0376749	1	0.414013	3.55752	0.91344	1.72973	-0.141176	2.28079	0.695238	0.379113	1.43137	0.491443	0.146119	0.6396	0.27907	0.247546	2.30457	1.19186
677		0.289941	0.0199557	0.258065	0.199663	0.0998767	0.035461	0.84	-0.0222222	0.369565	0.109589	0.128021	0.896226	-0.015124	-0.0042735	1.39726	0.0434783	0.363636	0.0964467	1.36975	0.891892	0.449405	0.412639	0.044898	0.450216	0.342391	2.17201	0.928571	0.983333	0.726582	0.120468	-0.0243902	0.734043	0.162887	2.92308	1.02844	1.71605	-0.0943396	3.04211	0.233333	0.611511	1.22527	0.601918	0.0591716	0.349506	0.275862	0.271484	1.89286	1.14371
678		0.185841	-0.0355556	0.159184	0.211149	0.134071	0.115995	0.721311	-0.0588235	0.166667	0.0310842	0.0667854	0.783019	0	0.0900901	1.43357	0.0527523	0.366584	0.00744417	0.968127	0.716216	0.323529	0.752988	-0.0854701	0.229474	0.424581	2.59494	0.651685	0.8125	0.959079	0.138372	0.0293021	0.966667	0.204771	3.07407	0.980998	1.875	-0.155844	2.35238	0.546218	0.43804	1.45272	0.588689	0.17434	0.655959	0.184783	0.239381	1.86124	1.3631
679		0.247863	-0.0356757	0.220884	0.220588	0.190709	-0.0498262	0.746032	-0.216374	0.15903	0.046887	0.205674	0.690867	0.0205562	-0.0828025	1.38326	-0.0526316	0.263158	-0.00961538	1.24806	1.12422	0.393225	0.588015	0.0901639	0.388646	0.468144	2.10787	0.755682	1.29032	0.642487	0.0767494	0.102107	0.943182	0.380342	3.25833	0.93911	1.93827	-0.146067	2.5023	0.619835	0.410959	1.3726	0.512438	0.0852359	0.367111	0.107345	0.210433	1.87317	0.808383
680		0.337423	0.0295728	0.186441	0.160745	0.0607187	0.102596	1.05	-0.0994152	0.261456	0.0781129	0.214286	0.657957	-0.0357143	0.128806	1.51142	-0.0987791	0.15122	0.0878049	1.61277	0.773333	0.329412	0.791506	0.102564	0.365217	0.254144	2.8123	1.09384	1.05	0.78125	0.169988	0.0755654	0.698795	0.46723	3.70175	0.985525	1.69333	-0.211429	2.37056	1.07547	0.502874	1.50877	0.829574	0.0971599	0.281222	0.147929	0.250221	2.04412	0.96875
681		0.251462	-0.0383352	0.280335	0.265375	0.172952	0.0515971	0.537313	-0.0114943	0.399449	0.0453172	0.131907	0.944162	0.0174384	-0.00438596	1.41204	0.0207852	0.20202	-0.00733496	1.12648	1.05882	0.389535	0.488372	-0.225806	0.294624	0.640244	2.51553	0.661111	1.29008	0.714286	0.0897656	0.078346	0.952941	0.352577	2.37589	0.921241	1.45238	-0.39779	2.26852	0.541284	0.458993	1.23913	0.834171	0.250604	0.337511	0.197452	0.251911	2.00488	1.31776
682		0.295181	0.0364641	-0.00414938	0.198326	0.0420792	0.0557533	0.889764	-0.254438	0.240106	0.0367534	0.141071	1.05063	0.0293399	0.223684	1.44397	-0.0580866	0.493671	-0.0445545	1.275	1.46032	0.370482	0.271375	0.10084	0.441964	0.426934	2.16867	0.728261	1.08	0.647355	0.0890052	0.129528	0.988764	0.436214	3.12319	0.92	1.72973	-0.0759494	2.39512	0.38843	0.331476	1.27586	0.792405	0.208366	0.334545	0.0931677	0.233193	1.92929	1.2625
683		0.263456	-0.10596	0.320158	0.257334	0.0229746	0.115288	0.85	-0.144385	0.174263	0.0314371	0.131975	0.735225	0.0241838	0.0299145	0.983368	0.0482604	0.357843	0.138686	1.0597	0.904762	0.438336	0.680297	-0.132812	0.431193	0.403794	2.35905	0.885246	0.608392	0.673575	0.0849443	0.113952	0.377049	0.353191	2.73585	1.01887	1.81928	-0.377778	2.37557	0.411765	0.427746	1.33152	0.83812	0.0192308	0.635091	0.308642	0.226849	2.02262	1.30625
684		0.250737	-0.0463576	0.213389	0.209184	0.15051	0.0441001	1.15789	0.100592	0.356125	0.115086	0.19963	0.668934	-0.0488095	0.142857	1.20339	0.0427928	0.325	0.0224439	1.22656	0.453416	0.386905	0.425287	-0.0265487	0.257642	0.557951	2.26935	1.02933	1.26087	0.701031	0.136444	0.028877	0.92	0.35443	2.64662	0.98556	2.1875	-0.317365	2.62136	0.555556	0.445887	1.25507	0.712159	0.148064	0.373321	0.0227273	0.255847	2.20792	1.22024
685		0.118644	-0.00331492	0.24	0.194653	0.00479616	0.107275	1.01786	-0.0348837	0.264305	0.07633	0.0614828	0.94686	-0.00549786	0.0151844	1.30664	-0.00342857	0.402062	-0.040201	1.32389	1.10458	0.498452	0.229008	0.0543933	0.36105	0.333333	2.29513	0.861111	0.935484	0.784062	0.124854	0.0215285	0.855422	0.438669	2.84127	1.04177	1.65854	-0.144654	2.38605	0.59322	0.616071	1.29775	0.846547	0.151561	0.440073	0.149701	0.276273	1.53363	1.18713
686		0.234421	-0.0382166	-0.047619	0.20034	0.0696517	0.162095	1.11667	0.0726257	0.0374332	-0.0498534	0.0849315	0.979381	-0.0172202	0.12963	1.2027	-0.0320366	0.321951	0.00985222	1.0856	0.584416	0.435976	0.561338	0.0871369	0.463303	0.420912	2.40491	0.829201	1.09302	0.628272	0.156671	0.0851872	1.17751	0.467811	3.13333	1.01442	1.91667	0.125749	2.16	1.14545	0.447887	1.53179	0.905	0.0853749	0.507692	0.298246	0.291962	1.84848	1.19219
687		0.471125	-0.0364641	0.296137	0.19202	0.0995025	0.111111	0.930435	-0.0674157	0.488506	0.0861133	0.136237	1.01026	0.00189514	0.0779221	1.32258	0.126627	0.315271	-0.0102564	1.39506	1.23256	0.340267	0.700405	0.042735	0.296943	0.362881	2.65902	0.684848	1.0885	0.739362	0.12604	0.00598802	0.962264	0.32636	2.92562	1.02509	3.38462	-0.133333	2.54808	0.380531	0.471533	1.58997	0.619289	0.13354	0.674419	0.0877193	0.265262	1.5354	1.46645
688		0.349845	0.0764045	0.219731	0.142381	0.0988447	0.0859278	0.803571	-0.118012	0.343109	0.020658	0.0359712	0.792208	0.0338346	0.0232558	1.54589	-0.0209059	0.262887	-0.0856423	1.39669	0.735099	0.363215	0.664122	-0.270161	0.471526	0.495702	2.74277	1.04308	1.47706	0.83727	0.115702	0.092437	0.604396	0.33913	3.31818	1.10283	2.16129	-0.0588235	2.29703	0.404959	0.388235	1.35294	0.668367	0.173811	0.465291	-0.00606061	0.246392	1.74886	1.23301
689		0.434783	0.0251716	0.458515	0.244843	0.219388	0.0212235	1.27586	-0.141104	0.223464	0.104972	0.100461	1.08377	0.0306442	0.165919	1.38605	0	0.322751	0.235142	1.74107	0.777778	0.4176	0.470356	-0.428	0.402844	0.478788	2.40854	1.04255	1.01754	0.858311	0.189994	0.0362473	0.298969	0.485232	3.80169	1.06708	1.68571	-0.179487	2.61538	0.589286	0.429799	1.29363	0.75	0.171717	0.40107	0.4	0.213055	1.73892	1.10366
690		0.339506	0.0332594	0.470852	0.220601	0.0508475	-0.0238394	0.709677	-0.0170455	0.309589	0.0775255	0.104396	0.893401	0	0.0833333	1.41469	-0.0188679	0.515625	0.0439024	1.0241	0.926471	0.385561	0.402299	0.0347826	0.39819	0.775148	2.23582	0.953488	1.12598	0.556675	0.11124	0.013624	0.846154	0.419624	2.93469	1.03034	1.08889	-0.373494	2.38298	0.38843	0.529235	1.4104	0.757732	0.146853	0.467054	-0.037037	0.236671	2.15429	1.17197
691		0.291291	-0.027933	0.201681	0.297249	-0.165116	0.0282209	0.358779	-0.180851	0.38764	-0.00317965	0.157895	0.64467	0.0681676	-0.0637363	1.48485	-0.00589623	0.421189	-0.115578	1.41176	0.927007	0.349769	0.488	0.092511	0.352423	0.645963	2.23926	0.778426	0.873016	0.813953	0.0938053	-0.0199246	0.699422	0.434043	2.61317	0.922612	2.08571	0.123457	2.06161	0.479675	0.474453	1.45143	0.772021	0.105023	0.451702	-0.0722892	0.191023	2.3202	1.40127
692		0.40625	0.0354767	0.275	0.169912	0.154748	0.0519645	1.18367	-0.118644	0.285714	0.020979	0.0712353	0.877863	0.0136816	0.0263158	1.45714	0.0800971	0.483029	-0.025641	1.23256	0.864865	0.296124	0.579365	-0.0627615	0.41452	0.62623	2.9868	0.827089	0.940299	0.925134	0.166567	0.105263	0.964497	0.56	2.45185	0.972222	1.39506	-0.183432	1.95238	0.945455	0.544228	1.51895	0.664234	0.231008	0.445525	0.0538922	0.238434	2	0.77193
693		0.325228	0.072	0.244635	0.156197	0.00236967	0.140283	1.33898	-0.0887574	0.306358	0.122222	0.176796	0.982955	0.0136816	0.0566893	1.49881	-0.0452381	0.542857	0.104326	1.04428	0.687943	0.432558	0.448	0.129707	0.484018	0.548387	2.59615	0.727273	0.865672	0.693878	0.0944742	0.0328691	0.551515	0.468132	2.74615	0.922987	2.21212	-0.118421	2.69634	0.578947	0.511244	1.47025	0.799472	0.101427	0.453358	0.207101	0.192463	1.89216	1.28395
694		0.259939	-0.0540541	0.239669	0.207018	0.124378	0.113111	1.10435	-0.168675	0.45245	0.0659072	0.132075	1.14917	0.0151976	-0.0507726	1.38532	-0.0406504	0.372751	0.091358	1.19492	0.974522	0.298193	0.333333	0.137931	0.337868	0.52	2.65472	0.730337	1.04959	0.584416	0.115687	0.113367	0.987952	0.377119	3.2807	0.942446	1.59155	-0.0519481	3.19251	1.26804	0.445714	1.11268	0.590476	0.16129	0.474074	0.4	0.208969	1.90155	1.28105
695		0.339506	-0.0901099	0.324324	0.289286	-0.0283688	-0.00251256	1.1157	-0.060241	0.481268	0.0678372	0.143636	0.874674	0.0971429	0.0313901	1.28017	0.021102	0.323308	0.0677083	1.10566	0.858156	0.328197	0.530769	0.121739	0.502283	0.550898	2.21581	1.01744	0.755725	0.604061	0.205096	0.0438695	1.2716	0.183505	2.8247	0.894349	2.72727	-0.235294	2.88482	0.263158	0.529954	1.5503	0.818182	0.128854	0.473088	-0.0714286	0.223513	1.657	1.53918
696		0.315152	0.0408401	0.168067	0.200698	0.158831	0.227931	1.40777	-0.0292398	0.297587	0.0581673	0.0635631	1.04255	0.0226131	-0.0497738	1.24499	-0.0157385	0.21875	0.0463918	1.39669	0.736842	0.490566	0.524904	0.160173	0.529976	0.798013	2.72185	1	1.05128	0.764398	0.151292	0.0852368	1.0625	0.420601	4.17857	0.932611	2.57576	0.0125	2.80488	0.297297	0.378613	1.41667	0.753769	0.105512	0.466292	0.149425	0.252387	2.05556	1.2327
697		0.229412	0.00689655	0.277778	0.196905	0.0594966	-0.00501253	0.483333	-0.310345	0.307263	0.04038	0.134701	1.09264	-0.00121065	0.03125	1.06897	0.0605701	0.444156	0.117949	1.12955	1.08054	0.421304	0.53668	0.175439	0.41784	0.561254	2.59615	0.539326	0.955556	0.78534	0.0890117	0.0717489	1.14286	0.405405	3.1157	0.935802	1.68421	-0.0538922	2.54639	0.831776	0.461765	1.33239	0.793451	0.187251	0.496212	0.317365	0.150313	1.76098	1.37821
698		0.344262	0.0818916	0.226891	0.0957983	0.146821	0.125475	0.639344	-0.177914	0.395894	0.0048	-0.00713012	0.824742	0.0406504	0.0615034	1.38813	-0.0702576	0.43	0.0623441	1.3004	1.38462	0.433904	0.530364	0.209302	0.462617	0.487179	2.6459	0.880342	0.732283	0.740933	0.0710383	0.0010929	0.928571	0.419214	3.2562	0.929697	1.42105	-0.216867	2.77778	0.637931	0.556222	1.42775	0.795812	0.0896337	0.546992	0.232704	0.238779	1.91626	1.14458
699		0.503401	0.0690058	0.276018	0.253054	0.198992	0.0991217	0.813084	0.0609756	0.405248	0.0696517	0.125	1.04071	0.0577889	0.253456	1.38771	0.0310263	0.234257	0.0123762	1.12987	0.751724	0.442308	0.620553	0.162162	0.371429	0.816993	2.36741	0.873199	1.03125	0.348718	0.0505549	0.0899888	0.95092	0.337662	2.83969	0.936893	1.85246	-0.118421	2.74619	0.333333	0.56231	1.54441	0.652174	0.197452	0.367273	0.00578035	0.131702	1.94231	1.25
700		0.272152	0.067757	0.387931	0.329068	0.107807	0.138381	0.688073	0.0963855	0.348066	0.0933113	0.0259624	0.851648	0.0946708	0.116592	1.19955	0.0752056	0.282723	0.121053	1.5	0.77931	0.488889	0.525692	-0.0265487	0.415313	0.905724	2.44127	0.958333	1	0.448087	0.129733	0.079646	0.865854	0.435789	2.856	0.878713	2.25373	0.0379747	3.04396	0.672727	0.659574	1.46291	0.82199	0.0900474	0.499025	0.307692	0.0691517	2.04615	1.19692
701		0.21118	0.0391705	0.402715	0.309973	0.12285	0.153425	0.344262	0.0705882	0.45625	0.0741646	0.0829535	1.09189	0.0452261	0.294686	1.26389	0.00365408	0.14433	0.150259	1	0.496689	0.380503	0.492188	0.163793	0.316279	0.756667	2.30625	0.829912	0.954198	0.494565	0.146896	0.0765714	0.987342	0.69863	2.73384	0.966667	1.55072	-0.0994152	2.29412	0.622642	0.487023	1.31373	0.665782	0.220312	0.469112	0.130435	0.16242	1.79803	0.832836
702		0.440994	-0.0607102	0.00429185	0.153043	0.00988875	0.13394	1.13559	0.0404624	0.174419	0.125612	0.0960659	0.953247	0.0317259	0.0401786	1.51781	0.0478469	0.176471	0.0327456	1.11475	0.973333	0.393365	0.4	0.225532	0.334906	0.286908	2.2716	0.849275	0.789474	0.700787	0.139272	-0.045354	0.975904	0.666667	2.86784	0.933333	1.47619	-0.103896	3.02128	0.660377	0.557229	1.37602	0.846154	0.189103	0.421642	0.177914	0.1879	1.83168	1.45098
703		0.62987	0.00355872	0.180617	0.248474	0.178439	0.0201005	0.798165	0.0709677	0.28655	0.107492	0.0953271	0.955432	0.00960922	0.0460829	1.38741	-0.147392	0.446575	0.00268097	1.49524	1.31206	0.334385	0.482353	0.230769	0.157658	0.377246	2.41853	1.00625	0.76378	0.680412	0.0580247	0.0646651	1.01316	0.437768	2.8961	1.11009	2.09091	-0.0718954	2.9893	0.352941	0.421538	1.60355	0.808081	0.207577	0.427788	0.113772	0.173509	1.90355	1
704		0.4625	0.111628	0.027027	0.253867	0.103797	0.0407359	0.926606	0.0675676	0.316294	0.150617	0.0852858	1.24719	0.026098	-0.0990991	1.33875	-0.0498177	0.494565	-0.00779221	1.38739	1.22059	0.434711	0.677966	0.100917	0.490385	0.427729	2.40645	0.874214	1.25455	0.877005	0.13087	0.0452489	0.98773	0.524664	3.19917	0.863268	2.48387	-0.212903	2.90698	0.723404	0.411095	1.28488	0.610973	0.168379	0.491329	0.3125	0.143709	1.91707	1.12422
705		0.327485	0.00238663	0.163636	0.19712	-0.053152	0.0961039	1.5045	-0.0493827	0.427711	0.0738037	0.119705	0.937173	0.0548034	0.0609481	1.40988	0.228288	0.340153	0.0285714	1.31092	1.16552	0.372742	0.559055	0.190698	0.337808	0.351351	1.9209	0.925926	1.17188	0.469496	0.0379437	-0.0145251	1.32215	0.403805	3.46491	0.848039	1.87324	-0.134146	2.9322	0.979592	0.452096	1.50289	0.724311	0.180999	0.460886	0.358974	0.207145	2.2337	0.981366
706		0.454545	0.0896226	0.387931	0.206266	0.252111	-0.0078329	0.644068	-0.104651	0.206897	0.0455285	0.159886	1.20109	0.0496454	0.0266667	1.38278	0.0234192	0.309091	0.128342	1.24885	1.17021	0.434505	0.466667	0.0654206	0.442177	0.48503	2.56634	0.832335	1.01695	1.38544	0.0686642	0.115646	0.975	0.383929	2.76154	0.957447	1.34568	-0.267974	3.04396	0.618182	0.534954	1.96029	0.815385	0.0355791	0.426966	0.373494	0.164471	1.65625	1.3661
707		0.561905	0.00350877	0.182609	0.289668	0.0539216	0.123217	1	-0.292135	0.308782	0.143091	0.115242	0.918367	0.0854592	0.132251	1.3341	0.0675676	0.412073	-0.0242588	1.07759	1.0458	0.296178	0.0170648	0.294118	0.417062	0.393586	2.51534	1	0.84127	0.727749	0.0598396	0.068633	0.871795	0.42735	2.92889	0.92674	1.91176	-0.148387	2.59184	0.352941	0.591463	1.37288	0.708333	0.087529	0.423221	-0.0125	0.184215	1.90722	1.19231
708		0.532468	0.016055	0.236364	0.258093	0.244922	0.145431	0.645161	0.0232558	0.434783	0.0904645	0.0570902	0.896907	0.058208	0.117371	1.4455	-0.0314685	0.352785	0.0638298	1.27907	0.734266	0.375	0.520599	0.317308	0.431507	0.5	2.29747	0.981982	0.968	0.526596	0.0436954	0.0648464	1.29677	0.541401	2.84375	0.867485	2.11111	-0.431953	3.0107	0.254237	0.469265	2.66942	0.653944	0.181675	0.466179	0.0909091	0.179624	1.79717	1.31973
709		0.386076	0.0387779	0.424528	0.215168	-0.00118765	0.0747423	0.982456	0.109756	0.159159	0.0809485	0.102683	0.98374	0.069281	0.116279	1.26667	0.0379437	0.331593	0.0670241	1.26087	0.585714	0.3056	0.473251	-0.309917	0.460808	0.578313	2.37349	0.901538	1.06897	0.934959	0.00823306	0.0447761	1.20645	0.525641	2.44203	0.918159	2.46269	-0.012987	2.81633	0.519231	0.549925	2.0515	0.74359	0.0361991	0.516161	0.0833333	0.183827	1.84817	1.12219
710		0.343653	0.118483	0.304721	0.234945	0.158845	-0.0518331	0.963964	-0.174419	0.445122	-0.0171149	0.0873606	1.15954	0.0558442	0.128571	1.17619	-0.058548	0.340599	-0.0520833	1.21296	1.13433	0.401626	0.505882	0.0423729	0.49537	0.554839	2.68056	1.01852	0.580645	0.961957	0.0392283	0.0801833	0.850575	0.473451	2.41045	0.942786	1.91667	-0.187097	2.84127	0.464286	0.538226	1.68404	0.613941	0.176942	0.42803	0.0487805	0.171889	1.82353	1.14379
711		0.339564	-0.114219	0.235849	0.223958	0.172897	0.0618557	0.982301	-0.129412	0.366569	0.0870968	-0.0053286	1.11732	0.0259067	0.114286	1.37346	-0.0108434	0.241206	-0.0703518	1.42478	1.2029	0.302839	0.438202	0.112069	0.425743	0.567398	2.22152	0.546269	1.13559	0.946667	0.0489335	0.000571755	0.844311	0.364562	3.13734	0.966963	2.60714	-0.154762	2.57143	0.875	0.506608	2.12757	0.556122	0.110405	0.347209	0.025974	0.201538	2.12245	1.25
712		0.551948	-0.00579374	0.407725	0.298429	0.00952381	0.128477	0.630252	-0.159763	0.358025	0.0983871	0.160865	0.955923	0.0395334	0.0839002	1.58163	-0.00608273	0.260759	0.175202	1.19742	1.12857	0.350734	0.387097	0.268519	0.366589	0.713433	2.41853	0.98773	0.966942	0.413613	0.0815671	0.0834327	1.11321	0.424307	3.10256	1.08115	1.19444	-0.132075	3.41667	0.398374	0.538695	1.22414	0.70235	0.165733	0.435897	0.0691824	0.195967	1.92611	1.23871
713		0.320388	0.00945626	0.451327	0.242181	0.04474	0.133421	1.29412	-0.0760234	0.405405	0.152	0.113402	0.782123	0.0787248	0.0273973	1.38049	-0.02457	0.278515	-0.144357	1.0885	1.38235	0.504078	0.632653	0.323944	0.545238	0.374631	2.30769	0.907692	1.22034	0.506702	0.112934	0.0393519	1.03974	0.378151	2.70635	0.923077	1.50667	0.202614	2.4709	0.669725	0.452308	1.80969	0.596059	0.17175	0.530516	0.285714	0.234517	2.02463	1.19936
714		0.414925	-0.0204082	0.236364	0.261733	-0.0227818	0.122667	0.703125	-0.347826	0.359756	0.0996732	0.182674	0.910995	0.00766284	0.0630631	1.31354	-0.0739857	0.31694	0.0350404	1.3105	1.02597	0.415482	0.470817	0.232227	0.509615	0.643917	2.44482	1.05161	0.766667	0.741117	0.112557	0.095826	0.899371	0.572052	3.20492	1.02587	1.24615	0.25	2.47644	0.553398	0.64557	1.1863	0.658291	0.115385	0.39097	0.365854	0.183536	2.13333	1.31081
715		0.153153	0.0644391	0.283019	0.333945	0.0571081	0.146703	0.927273	-0.148148	0.427673	0.11039	0.0820276	0.765027	0.0705726	0.062645	1.36869	0	0.40274	0.0326087	1.42574	0.881481	0.373609	0.376	0.348018	0.659794	0.624242	2.53265	1.0443	1.49573	0.710227	0.106355	0.047011	0.433526	0.651805	3	1.02075	2.41538	0.121622	3.05682	0.692308	0.563291	2.67755	0.916898	0.201931	0.464627	0.113924	0.189729	2.04569	1.15142
716		0.402516	0.0494572	0.300885	0.184044	0.169492	0.0870147	0.981651	0.0886076	0.470769	0.0996785	0.0794521	1.01111	-0.129156	0.0722611	1.38967	-0.046595	0.128463	0.0837696	0.944444	1.0274	0.45302	0.371429	0.0220264	0.621762	0.607477	2.19614	1.07668	1.70588	0.771588	0.103404	0.080826	0.687861	0.547826	2.99119	1	2.84615	-0.0135135	3.70238	0.527273	0.565217	1.5136	0.595745	0.112164	0.541339	0.037037	0.169626	2.28571	1.05714
717		0.379747	0.0277443	0.225225	0.294333	0.235732	0.210312	0.857143	0.045977	0.507987	0.13982	0.0287908	1.11144	0.0447562	0.128571	1.30216	-0.0792317	0.45	0.00510204	1.19048	1.14706	0.31	0.531746	-0.0363636	0.35545	0.480826	2.55975	1.17476	0.983051	0.712707	0.115385	0.0692718	0.961783	0.596452	2.84549	1.06321	2.08197	-0.0322581	2.92265	0.385965	0.5456	2.48548	0.760446	0.270227	0.428571	0.234568	0.232807	2.23034	1.11838
718		0.272727	-0.0801394	0.301724	0.343312	0.140741	0.0540881	1.15556	0.167702	0.473016	-0.00237154	-0.00185529	1.06952	0.0513676	0.130435	1.33796	-0.0362757	0.448468	0.207254	1.41026	1.61417	0.374392	0.281853	0.115207	0.163717	0.586207	2.62939	0.837681	0.963636	0.856	0.120657	0.0668203	1.19355	0.607064	3.34286	1.05426	1	-0.0897436	3.24138	0.418182	0.540373	2.39623	0.679587	0.163987	0.431353	0.189873	0.244958	1.83938	1.12881
719		0.4791	0.075846	0.5	0.239332	0.128463	0.0343949	0.904762	-0.180723	0.323529	0.113238	0.207977	1.04638	0.011889	0.227818	1.14188	0.0597758	0.375691	0.0797872	1.14	0.913043	0.4323	0.392713	0.333333	0.4	0.409524	2.47573	1.13333	1.0354	1.16022	0.0959596	0.0288351	1.2293	0.504348	3.25	0.897243	1.7027	-0.0595238	3.12155	0.509804	0.485804	1.76677	0.825137	0.148356	0.477137	0.247059	0.162567	1.93923	0.712575
720		0.504823	0.0234279	0.37963	0.340909	0.112455	-0.0263158	0.960784	-0.103896	0.406061	0.130579	0.0958374	1.17465	-0.0156658	0.0697674	1.50633	0.102273	0.29863	0.015625	1.33508	1.61157	0.372549	0.483607	0.411215	0.399015	0.630769	2.84561	1.09346	1.26168	0.583784	0.123956	0.0973036	0.986486	0.54386	3.01674	1.12051	1.58824	-0.012987	3.02198	1.1	0.647975	2.49627	0.671159	0.166113	0.408183	-0.05	0.206315	2.25	1.24359
721		0.349544	-0.0116279	0.449275	0.226212	0.12	0.0937099	1	0.044586	0.470405	0.112406	0.136237	0.847887	0.0111622	0.169451	1.64987	0.052506	0.338753	0.0588235	1.00926	1.04196	0.4	0.688312	0.31068	0.471154	0.435435	2.56774	0.925	1.05042	0.796875	0.247657	0.0540701	1.18841	0.747664	2.90598	1.11673	1.17143	-0.133333	3.06818	0.555556	0.620637	1.56698	0.854447	0.209611	0.301075	0.217391	0.192308	1.52968	1.23729
722		0.341853	0.0337349	0.353982	0.252285	0.0695876	-0.0686016	0.981651	-0.025	0.314985	0.16428	0.0477064	1.01714	-0.0137345	0.0236967	1.56511	-0.00374532	0.464088	0.00795756	1.15152	0.930556	0.326667	0.466667	0.330049	0.393035	0.54232	2.5034	0.824773	0.678571	0.744318	0.0537084	0.0778233	0.802469	0.525424	3.42056	1.11685	1.89552	-0.211268	2.76344	0.611111	0.380665	1.53503	0.454545	0.143552	0.37806	0.0538922	0.181379	1.45972	1.09804
723		0.501597	0.0215827	0.398148	0.149425	0.154047	-0.0131926	0.87156	-0.157895	0.393548	0.158526	0.0442145	1.0826	-0.00265957	0.149644	1.28972	0.0260223	0.405099	0.115282	1.41711	1.25185	0.431507	0.589744	0.0593607	0.398058	0.739683	2.4026	1.08784	0.9	0.951351	0.0772304	0.0976909	0.763314	0.663594	2.51598	1.0052	2.71429	-0.0201342	2.27273	0.192308	0.477987	1.2948	0.721053	0.189894	0.415205	0.037037	0.234198	1.59259	1.26936
724		0.42492	0.0220674	0.191489	0.287879	0.197026	0.0405405	1.15238	0.130952	0.571865	0.196639	0.147826	1.06162	0.0147651	0.0474041	1.22549	-0.0471584	0.173184	-0.0666667	0.892683	1.40602	0.461017	0.5	0.116505	0.437939	0.603774	2.29097	1.06918	0.874016	1.03252	0.104232	-0.011655	0.871795	0.548654	3.31336	0.895782	1.61765	0	3.60377	0.518519	0.413249	1.51875	0.715818	0.219672	0.437736	0.0769231	0.178706	1.41667	1.27586
725		0.48125	0.0629371	0.623762	0.345216	0.212938	-0.0178571	0.528302	0.0299401	0.6	0.0803645	0.0207547	1.13213	-0.0316073	0.218045	1.37468	-0.0671463	0.435754	0.00552486	0.9	1.20588	0.451777	0.437229	0.226131	0.25	0.470968	2.41956	0.993846	0.544643	0.565217	0.098789	0.0400471	1.10458	0.851319	3.30275	1.10832	2.30909	0.00689655	3.25275	0.55102	0.547287	1.38438	0.65445	0.172749	0.44393	0.291139	0.251399	1.18919	1.1759
726		0.4377	0.0575793	0.0648148	0.249541	0.0232558	0.0650407	1.07477	0.314685	0.355224	0.0733718	0.0217186	0.98827	-0.00907912	0.173267	1.53158	-0.0175659	0.539359	0.162534	1.36458	1.26866	0.483304	0.266932	0.186916	0.521411	0.74026	2.25879	1.07643	0.686957	0.811111	0.152988	-0.042007	1.02703	0.631579	2.7686	1	1.19753	0.0212766	3.25287	0.59596	0.596875	1.59813	0.768595	0.252115	0.432459	0.165644	0.225557	1.49038	1.18893
727		0.503401	-0.0128056	0.317308	0.305005	0.182796	0.00922266	0.504348	0.0625	0.616883	0.0843776	0.153921	1.09756	0.0456093	0.016092	1.47692	-0.0540541	0.376045	0.0134048	1.07778	1.31579	0.339967	0.390244	0.133333	0.392857	0.539936	2.44872	0.993506	0.895652	0.795148	0.163399	0.0598592	1.04054	0.54386	2.94805	1.05469	2	-0.128205	2.76596	0.4	0.643312	1.55108	0.669468	0.184483	0.416357	0.0128205	0.229668	1.53202	1.08
728		0.365696	-0.00950119	0.21267	0.330097	0.196787	0.046729	1.1165	0.0691824	0.457944	0.124478	0.093985	0.960563	-0.0379085	0.080292	1.23358	0.0243278	0.478754	0.100775	1.04167	0.93007	0.376623	0.408	0.36	0.415233	0.692308	2.2446	1.04848	0.655738	0.597765	0.217848	0.0976314	1.28758	0.674833	3.78182	1.11856	1.7	-0.153374	3.15476	0.673077	0.4875	1.62769	0.670157	0.192869	0.466158	0.210191	0.210324	1.61307	1.10031
729		0.326797	0.0920097	0.386792	0.269159	0.181208	0.0956284	1.35052	0.277778	0.426791	0.0898305	0.119843	0.809524	-0.00334001	0.0145631	1.28571	0.0332481	0.418079	0.197802	1.3125	1.50394	0.339775	0.401709	0.471154	0.522167	0.560372	2.51701	0.987179	1.03604	0.797753	0.152587	0.0706363	0.829787	0.562791	2.77778	0.989691	1.58824	0.0540541	2.91954	0.645833	0.559934	1.35294	0.669421	0.211457	0.324048	0.102564	0.205882	1.32407	0.913907
730		0.4125	0.0218978	0.238938	0.250909	0.193989	0.0842391	0.709091	0.115385	0.60472	0.20403	0.13271	0.878116	0.0709413	0.0141509	1.36058	-0.115108	0.366947	0.0341207	1.0973	0.676056	0.508361	0.6	0.410628	0.470588	0.621795	2.29487	1.03096	1.08475	0.693989	0.124183	0.0881135	1.05442	0.490909	2.93237	1.02466	1	-0.0310559	3.36872	0.862745	0.522621	1.79487	0.739837	0.308297	0.35568	0.157895	0.145387	1.54028	1.1794
731		0.444795	0.0208078	0.451163	0.305344	0.183784	0.0285714	0.980952	-0.05	0.496855	0.0646516	0.0573614	0.884058	-0.0240642	0.185542	1.2481	-0.00252525	0.431755	-0.0430108	0.821053	0.954887	0.413793	0.447154	0.259259	0.435	0.816993	2.10191	1.10423	0.762712	0.539295	0.196581	0.0967359	1.32	0.381974	3.02885	1.06316	1.66667	0.178082	3.10526	0.666667	0.744262	1.71924	0.692708	0.148902	0.427194	0.0588235	0.136058	1.35294	1.31126
732		0.468852	0.0316302	0.261682	0.283951	0.0984043	0.0605263	0.941748	-0.106918	0.6	0.0836718	0.127273	0.912536	0.0307487	0.277778	1.36923	-0.0659631	0.358166	0.0327869	1.07368	1.46154	0.360269	0.44856	0.336493	0.412073	0.662252	2.26623	0.854545	0.933884	0.915014	0.212609	0.0249855	1.375	0.654206	3.67308	1.06324	1.87719	-0.152778	3.07821	1.08602	0.461659	1.65815	0.894444	0.216653	0.437681	0.0740741	0.129892	1.4	1.10738
733		0.664384	0.0676507	0.32093	0.243836	0.0444727	-0.0487484	0.666667	-0.154286	0.540881	0.135593	0.0607522	0.684211	-0.0645376	0.0199005	1.35806	0.0390625	0.322404	0.0714286	1.32	1.096	0.461407	0.767241	0.285714	0.341404	0.5875	2.2254	1.07571	0.927928	0.828255	0.170895	0.0989144	0.365854	0.6	3.03828	0.973082	1.77966	-0.0326797	2.84444	0.158879	0.569331	1.43963	0.751412	0.176268	0.483615	-0.128205	0.188997	1.52261	0.890578
734		0.610738	0.0159902	0.232227	0.209479	0.184	-0.110682	1.16	-0.10303	0.484076	0.178416	0.102616	0.921788	-0.0541082	0.0447059	1.31655	0.0699482	0.357542	0.129944	1.26901	1.22222	0.443262	0.298805	0.0344828	0.502538	0.763934	2.22623	0.95679	0.765766	0.82808	0.141319	0.026393	0.793548	0.700893	2.84038	1.15324	1.83636	0.0331126	3.33918	1	0.62987	1.82474	0.690667	0.200993	0.305816	-0.0429448	0.17525	1.39024	1.15082
735		0.5	0.0121951	0.517241	0.262857	0.0846995	0.0916442	0.926606	-0.268293	0.687708	0.0528967	0.0515063	0.66129	-0.000676133	0.26893	1.17115	-0.0820513	0.424419	-0.0644258	1.12121	1.08633	0.40625	0.526316	0.21608	0.485294	0.639871	2.06667	1.21192	1.86598	0.709589	0.228591	0.0755712	0.637584	0.604545	3.06481	0.901266	1.32353	0.117241	2.625	0.272727	0.552716	1.60423	0.781421	0.191987	0.371585	-0.0632911	0.134587	1.44898	0.912226
736		0.547297	-0.0376671	0.356436	0.291628	0.180929	0.113889	0.752381	0.0379747	0.564669	0.116239	0.130261	0.954674	-0.0508021	0.100737	1.47059	-0.0510585	0.578313	0.111111	0.834254	1.608	0.486486	0.482143	0.241706	0.390244	0.617021	2.5035	1.20667	0.793103	0.617729	0.100917	0.118406	0.771812	0.663755	3.30769	0.847348	2.01695	0.268966	3.11299	0.531532	0.658456	1.66242	0.72549	0.244068	0.464817	-0.158537	0.201148	1.59487	1.10274
737		0.705263	0.0531401	0.365385	0.250704	0.296855	-0.0583554	0.907407	-0.115152	0.78481	0.172881	0.0961348	0.962733	-0.0349933	-0.0440835	1.47118	-0.164557	0.39548	0.154472	1.38202	0.876923	0.434932	-0.127273	0.198113	0.394089	0.48366	2.76471	1.15541	1.01961	0.824561	0.142475	0.00873617	0.636364	0.395556	2.86301	1.04948	1.76923	0.156463	2.70652	0.727273	0.629984	1.72903	0.91404	0.209223	0.553942	0.0596026	0.192566	1.21429	1.05769
738		0.727599	-0.00597372	0.144186	0.319728	0.0384615	0.0624133	1.02041	-0.197452	0.676768	0.103101	0.0752688	1.08358	0.000693963	0.08	1.26835	-0.066838	0.508876	0.138122	0.815029	0.869565	0.383538	0.688889	0.241379	0.555556	0.516616	2.50694	1.02667	0.867925	0.19888	0.128726	0.0889552	0.738562	0.822727	3.30457	0.946595	1.45161	-0.0410959	2.9887	0.7	0.713333	1.40373	0.735537	0.170068	0.589069	0	0.210766	1.43192	1.0339
739		0.646259	0.0969325	0.444444	0.167123	0.172243	-0.0393487	0.8	-0.00653595	0.679487	0.0307564	0.10668	0.641026	0.0208193	0.205882	1.145	0.0103896	0.394659	0.218391	0.964706	0.794118	0.513699	-0.0451128	0.45	0.3	0.708978	2.48649	0.945763	0.478992	0.830508	0.120321	0.103448	0.474359	0.71954	3.36538	1.13915	1.37931	-0.128205	2.56122	0.472527	0.600644	1.99351	0.619565	0.238422	0.636555	0.0860927	0.171281	1.49	1.01342
740		0.555556	0.0498753	0.230047	0.346705	0.177522	0.0237467	0.551724	0.115385	0.529052	0.183673	0.109548	0.889213	-0.025	0.08	1.11429	0.0728218	0.532934	0.142061	1.0989	1.11268	0.415385	0.601732	0.33	0.682292	0.520249	2.34043	1.01246	0.80303	0.596542	0.12475	0.0516934	0.305389	0.674312	1.90909	1.04	1.12821	0.0909091	2.49171	0.257143	0.541667	1.98403	0.719677	0.193851	0.411985	0.251613	0.215307	1.50505	1.08304
741		0.486486	0.0871166	0.140187	0.259813	-0.0350665	0.00544959	1.40426	-0.00653595	0.555556	0.185121	0.110029	0.919308	0.0258792	0.0152284	1.07389	-0.08	0.565476	0.140401	1.08	1.05714	0.388235	0.584746	0.313433	0.412371	0.732484	2.80471	1.07767	0.909091	1.00592	0.0626236	0.0680071	0.625806	0.754545	2.88444	1.02116	2	0	2.9096	0.854545	0.512739	1.59941	0.916201	0.205106	0.509202	0.320513	0.172454	1.70408	1.10811
742		0.631399	0.0185414	0.242009	0.338418	-0.181132	0.0201342	0.777778	-0.228758	0.509202	0.120823	0.100196	1.05831	-0.0224033	-0.0217918	1.28	-0.0296774	0.547401	0.15942	0.929412	0.87931	0.490534	0.445378	0.258537	0.657143	0.423077	2.32515	1.01274	1.17241	0.6	0.0874317	0.0430678	0.761589	0.709007	3.21801	1.1958	1.25352	0.0410959	3.3494	1.04167	0.594249	1.67586	0.604278	0.229983	0.568282	-0.044586	0.146791	1.70103	1.14337
743		0.517685	0.0180941	0.364486	0.319066	0.160248	0.0264256	1.11009	0.233766	0.672131	0.138354	0.0972763	1.06667	-0.00752909	0.00990099	1.31188	0.0213033	0.591592	-0.0478723	1.36364	1.12676	0.346734	0.454545	0.178744	0.591731	0.694352	2.35738	1.07595	0.677419	0.645429	0.10354	-0.0168116	0.656051	0.709172	2.95455	0.933926	2.05263	-0.0533333	2.63441	0.105263	0.607029	1.63722	0.564246	0.229592	0.442591	0.194805	0.156804	1.13659	1.22442
744		0.452632	-0.0435835	0.308411	0.39667	0.0266667	0.0737135	0.528302	0.0128205	0.799353	0.141352	0.0802348	0.988406	0.00556328	-0.00985222	1.36461	-0.0539474	0.406593	0.13881	0.83908	1.35772	0.453901	-0.0413793	-0.00980392	0.441975	0.540453	2.51007	1.21656	0.763636	0.900875	0.176707	0.0464979	0.84	0.815534	3.14085	0.800263	0.681159	-0.0253165	2.93182	0.461538	0.717532	1.48276	0.817143	0.157715	0.511558	0.146667	0.211881	1.72632	1.10274
745		0.609756	-0.080292	0.376238	0.349624	0.00660502	0.123755	1.3617	-0.0718954	0.853821	0.115215	0.113503	0.963415	-0.0101557	0.178571	1.38021	0.0701058	0.402299	-0.0591549	1	0.69697	0.337838	0.475983	0.194313	0.482234	0.548387	2.35505	1.07947	0.850467	0.818681	0.157182	0.0545024	0.785235	0.744186	2.95238	1.05108	1.53125	-0.0638298	3.22642	0.666667	0.5296	1.94161	0.8	0.239859	0.480932	-0.232704	0.196542	1.36923	1.4794
746		0.517241	-0.118963	0.238532	0.364956	0.0682731	0.130919	0.58	-0.230769	0.651877	0.14461	0.093412	0.707463	0.0345781	0.101523	1.416	0.119048	0.243402	0.0504451	0.869822	1.43103	0.446585	0.418033	-0.0816327	0.425061	0.49359	2.59574	1.05806	0.785124	0.545977	0.0234427	0.0308789	0.618421	0.778302	3.54726	1.13092	1.41935	-0.012987	2.57609	0.652174	0.648604	1.49558	0.630435	0.246622	0.565126	0.417722	0.168496	1.55721	0.979239
747		0.572881	0.028777	0.447619	0.389899	0.162853	-0.015299	0.84	-0.134503	0.514563	0.0921739	0.108028	0.882006	0.0507545	0.102041	1.33333	-0.0234375	0.533333	0.0651558	1.06061	1.07692	0.430052	0.541126	0.19598	0.413462	0.626582	2.55479	1.05195	0.944954	0.884498	0.160055	0.0436893	0.670886	0.685185	2.97273	0.976593	1.2963	-0.380117	2.95349	0.564356	0.588331	1.62951	0.407821	0.195306	0.388832	0.464789	0.189189	1.35	1.26667
748		0.392405	-0.0276775	0.37799	0.294991	0.0572852	0.0206327	0.607143	-0.04	0.691358	0.184987	0.1801	1.07251	0.0359322	0.134021	1.30052	-0.0849176	0.461988	0.0583333	1.21818	1.40984	0.420139	0.382716	0.0377358	0.331695	0.553333	2.59559	1.0456	0.45614	0.977208	0.202255	0.0335731	0.702703	0.512415	3.6701	0.946452	1.44828	0.0588235	2.61081	0.495798	0.631068	1.6936	0.677054	0.265378	0.571744	0.0967742	0.191162	1.68687	0.938567
749		0.693878	0.0218447	0.291866	0.280156	-0.0477419	-0.0155587	0.714286	-0.220126	0.72956	0.0938338	0.147609	0.848837	0.0351351	0.0357143	1.38071	0.0189873	0.404494	0.16035	1.12346	1.14516	0.568058	0.693617	0.191919	0.418367	0.456869	2.27742	1.05505	1.1913	1.01671	0.110809	0.130061	0.765517	0.58371	3.4973	0.781726	1.86667	-0.034965	3.08383	0.742574	0.672241	1.9571	0.468085	0.242604	0.568359	0.177215	0.164577	1.8134	1.16487
750		0.414791	-0.00726392	0.333333	0.302554	0.112925	0.0732394	0.784946	-0.103896	0.700997	0.000877963	0.207779	0.915916	0.0527046	0.0123457	1.46369	0.010101	0.597598	0.113043	0.747126	1.52713	0.507042	0.537118	0.45	0.419525	0.601266	2.35314	0.799392	1.01852	0.583333	0.161734	0.0899345	1.11594	0.310811	3.68421	1.03836	1.74194	0.0384615	3.36478	0.849462	0.635158	1.64353	0.843137	0.293602	0.567338	-0.182927	0.136483	1.6631	1.04
751		0.591549	-0.068323	0.323232	0.285714	0.143255	-0.00840336	0.787234	-0.345455	0.593548	0.159926	0.138524	1.08	0.0127774	0.107692	1.0315	0.0410256	0.380682	0.147059	1.03571	0.924242	0.315697	0.240816	0.306931	0.779528	0.507886	2.79851	1.06557	0.403509	0.414085	0.0219853	0.029976	0.864662	0.732057	2.25217	1.01818	1.12121	-0.00719424	3.19162	0.553191	0.732888	1.40606	0.582245	0.2309	0.422741	0.341615	0.136364	1.45652	1.0596
752		0.630872	-0.0132053	0.339713	0.396189	0.076087	0.0944993	0.906542	0.258741	0.482428	0.153497	0.0323213	0.912023	0.060274	0.155	1.2108	0.0470588	0.577039	0.0809249	1.09938	0.968992	0.489286	0.147541	0.0521327	0.479381	0.584416	2.33788	1.14141	1.27083	0.918605	0.153417	0.0552826	0.846154	0.632653	3.54545	1.08322	1.17647	-0.0612245	2.53261	0.979592	0.705085	1.30861	0.684783	0.261092	0.465517	-0.047619	0.213474	1.67662	1.12903
753		0.709343	-0.025894	0.465969	0.303415	0.046729	-0.0503401	0.705882	0.0405405	0.665552	0.153846	0.0687623	0.808989	0.0231924	0.028133	1.24378	-0.0592784	0.373913	0.0432277	0.813253	1.41322	0.299652	0.462185	0.142857	0.604222	0.720137	2.94182	1.27083	0.945455	0.936599	0.113872	0.0447935	0.96	0.833333	3.01	1.06133	1.84746	0.119403	3.50617	0.390476	0.634868	1.69799	0.612717	0.0913663	0.488132	0.33758	0.217201	1.43434	0.986395
754		0.582492	0.127086	0.43	0.325203	0.124682	-0.0183616	0.773585	0	0.492163	0.0791993	0.0692076	0.608696	-0.0131306	0.0780856	1.23711	-0.0186418	0.395894	0.10119	0.790123	0.521127	0.394265	0.221311	0.233161	0.415789	0.487654	2.47945	1.24658	1.0339	0.576812	0.180071	0.10771	1.04225	0.669811	2.59606	0.971204	1	0.191176	3.34524	0.940594	0.749164	1.76341	0.67033	0.271172	0.353555	0.32	0.207047	1.56566	0.986928
755		0.737226	-0.0149626	0.659794	0.270352	-0.269036	-0.0113636	1.04	0	0.546667	0.141805	0.0823775	0.907692	0.00983146	0.0390244	1.47911	0.0817694	0.570588	0.103448	0.960526	1.18705	0.465677	0.565217	0.212766	0.713514	0.607362	2.74419	1.3299	0.864078	0.876106	0.153417	0.0480243	0.424658	0.687356	2.90196	1.11279	1.64516	0.0273973	2.9881	0.128713	0.763889	1.49682	0.585799	0.309545	0.373246	0.121622	0.192908	1.92941	1.05594
756		0.826415	0.0157959	0.15534	0.263261	-0.0165746	-0.0192837	0.940594	0.0263158	0.534884	0.134384	0.10998	1.0375	0.019337	0.187661	1.05955	-0.0550576	0.546828	0.0568182	1.22667	1.1791	0.407801	0.545064	0.0377358	0.476923	0.521036	2.48515	1.02632	1.03846	0.622419	0.0222841	0.0714286	0.706667	0.638051	2.9814	1.03018	0.6	-0.0482759	2.7513	0.3	0.631841	1.66452	0.715942	0.261374	0.833918	0.358209	0.175302	1.51813	0.852843
757		0.566434	-0.0681265	0.522843	0.323353	0.127321	0.00141643	0.790476	-0.217949	0.557047	0.165894	0.189691	1.15287	0.0203224	0.151515	1.22857	-0.0819672	0.698225	0.0996979	0.977778	1.04839	0.53902	0.50211	0.121212	0.407216	0.70303	2.63043	1.10596	0.779661	0.857567	0.203125	0.0791367	0.56962	0.670588	2.81116	1.02356	1.08108	0.0647482	3.03509	0.734694	0.595278	1.86957	0.603448	0.254833	0.509906	-0.0779221	0.179538	1.52083	1.11388
758		0.59589	-0.0148515	0.5	0.280326	0.0977654	0.0544413	0.956522	-0.180124	0.545455	0.109448	0.0553279	0.827692	-0.00209351	0.2021	1.27957	0.0298913	0.667692	0.116418	0.860759	1.01562	0.432836	0.491667	0.164948	0.447917	0.554098	2.40984	1.13953	0.814815	0.671642	0.174825	0.146879	0.460526	0.71564	3.61458	1.03408	1.85714	-0.146667	3.14286	0.320755	0.732673	1.60308	0.67052	0.242958	0.45789	0.122581	0.0878694	2.12088	1.32836
759		0.37931	0.0174129	0.384615	0.244797	0.0649718	0.0385757	0.531915	0.103448	0.614865	0.144455	0.107943	1.20253	-0.0257123	0.135417	1.28205	0.170765	0.471471	0.0419162	1.025	1.47458	0.474638	0.52381	0.00507614	0.467363	0.496732	2.61379	1.05387	1.09009	0.631579	0.126882	0.0447578	0.763158	0.818182	2.92727	0.99466	0.8	-0.112583	3.80503	0.515789	0.61512	1.63855	0.709302	0.370273	0.509843	0	0.136929	1.44898	0.843416
760		0.457143	-0.0490566	0.5	0.384615	0.128276	-0.00736377	1.04545	0.0331126	0.710345	0.122486	0.0682977	0.707042	-0.00556328	0.137566	1.22564	0.0329815	0.444126	-0.0294118	1.18182	0.676471	0.396296	0.403361	0.27	0.513924	0.596026	2.26316	0.930159	1.16327	0.6625	0.22238	0.069378	0.605442	0.774038	3.22886	0.98862	1.32836	-0.118421	2.93827	0.354167	0.630363	1.8746	0.530055	0.244718	0.953086	0.1125	0.210569	1.52308	1.23913
761		0.714286	-0.0508055	0.286432	0.361139	0.179412	0.0333817	0.938776	-0.062069	0.594406	0.0229148	0.117886	1.50165	-0.0604587	0.28382	1.68347	0.047619	0.5727	-0.13649	0.948052	1.25862	0.533945	0.45	0.037037	0.776567	0.541935	2.80153	1.16901	0.849057	0.734139	0.166209	0.0478469	0.675676	0.621381	2.88462	0.883657	1.08219	-0.037037	3.19048	0.347826	0.877408	1.48125	0.598945	0.170859	0.463271	0.402597	0.18704	1.87006	1.13605
762		0.572414	-0.00253807	0.235294	0.214357	0.0240453	-0.0508475	1.02105	-0.0263158	0.810526	0.135531	0.0888889	1.30519	-0.0119634	0.14433	1.1688	-0.0466321	0.715152	0.0914454	0.87013	0.823529	0.454212	0.530973	0.0695187	0.568421	0.56229	2.37024	0.907285	1.09346	0.709402	0.138483	0.0778443	1.24658	0.667426	2.96135	0.935657	1.85246	-0.313725	3.10465	0.572816	0.827465	1.62069	0.629834	0.367273	0.398467	0.119497	0.172263	1.79769	0.866221
763		0.650685	0.0291508	0.57513	0.408271	0.0980926	0.0696296	0.645833	0.19708	0.664336	0.0978957	0.126582	0.903537	-0.0162086	0.189474	1.08355	0.0706806	0.489736	0.1875	0.63522	1.08	0.524164	0.434426	0.127451	0.526596	0.538462	2.7	1.12838	0.773585	0.736196	0.13582	0.012955	0.493506	0.612903	3.38974	0.947507	1.63158	0.0857143	2.56906	0.574468	0.792164	1.73469	0.84	0.134666	0.830389	0.268966	0.1844	1.2963	1.09655
764		0.48	-0.0654912	0.372549	0.316206	0.0643777	-0.0416069	0.61165	-0.273885	0.589226	0.140152	0.0296221	1.1548	-0.0119803	0.0866142	1.25397	0.113314	0.598765	0.111111	1.11111	1.0916	0.405109	0.759259	0.154639	0.367609	0.409091	2.3986	0.92691	0.930435	0.649547	0.148668	0.0449784	0.837838	0.654676	2.80531	1.10141	1.44444	-0.197368	3.65409	0.670103	0.648425	1.53797	0.553073	0.231457	0.548654	0.183673	0.153739	1.37234	0.985612
765		0.482993	0.0206186	0.394231	0.450777	0.151079	0.0527859	0.631068	-0.313953	0.702128	0.144712	0.141372	1.04487	-0.000713776	0.2	1.41414	0.0122117	0.487952	0.113772	0.740741	1.25397	0.343972	0.608889	0.0569948	0.566138	0.735484	2.49826	1.1773	0.535714	0.445783	0.0963773	0.0747198	0.586207	0.984496	2.79808	1.02997	1.35821	0.0133333	3.33962	0.752577	0.822526	1.60984	0.62963	0.25614	0.425573	0.0789474	0.180169	1.40104	1.24265
766		0.679443	-0.0230179	0.330049	0.27551	0.112882	0.0250368	0.517857	-0.179487	0.475862	0.106383	0.124607	1.21184	-0.0505338	0.144357	1.05076	0.00132802	0.480597	-0.0322581	1	1.59829	0.339383	0.627907	0.303371	0.371429	0.644737	2.22712	1.18909	0.811321	0.712676	0.127555	0.0685104	0.71223	0.61949	2.88696	1.01958	1.29851	-0.15493	2.95266	0.454545	0.658206	1.49505	0.620321	0.199645	0.810111	-0.0318471	0.177518	1.73118	1.08276
767		0.615385	-0.0164349	0.368932	0.21206	0.0451527	0.0422125	0.754717	-0.0555556	0.622378	0.0173913	0.190987	1.3949	-0.0431034	0.176471	0.800525	0.101673	0.468571	0.10828	0.850932	1.61789	0.596154	0.20339	0.326203	0.767442	0.606557	2.52273	1.03413	0.862745	0.721362	0.171548	0.0190535	1.28788	0.763033	2.50893	0.997214	2.17241	-0.346939	3.20732	0.238095	0.784512	1.53797	0.490515	0.345656	0.422958	0.15	0.130503	1.51741	1.09091
768		0.562724	-0.0500642	0.390863	0.306991	0.0889774	0.0870871	0.627451	0	0.714286	0.177758	0.0618557	1.10774	0.0395968	0.230769	1.51381	0.0992063	0.492163	0.136778	0.961538	1.60345	0.491651	0.447368	0.197917	0.492063	0.691228	3.06178	1.05442	1.32653	0.44086	0.104539	0.0419753	0.472973	0.95443	2.83333	1.15562	1.71875	-0.136691	3.2	0.666667	0.701906	1.7893	0.745763	0.330909	0.388889	0.277419	0.170313	1.81609	0.910653
769		0.643357	-0.0954774	0.432836	0.333333	0.10462	-0.0210843	0.666667	-0.0410959	0.621818	0.115174	0.102591	1.14557	0.0367171	0.0486486	1.1768	0.0290237	0.796923	0.0755814	1.17219	1.12903	0.585938	0.455285	0.183246	0.509138	0.686667	2.59551	0.935943	0.673913	0.847561	0.147766	0.0621827	0.524476	0.726161	2.819	1.10467	2.12	-0.191489	3.46914	0.27619	0.695142	1.38554	0.473404	0.317518	0.51142	0.132075	0.106176	1.52222	1.15909
770		0.763066	-0.0377588	0.300493	0.229105	0.0445344	0.106061	0.75	0.0945946	0.540541	0.170916	0.104723	1.07973	0.0527076	0.255319	1.36565	0.0145119	0.507599	0.180124	1.1039	0.917241	0.298373	0.377193	0.185185	0.465649	0.625442	2.5303	0.855738	1	0.745763	0.138396	0.111111	0.655629	0.776224	2.86341	1.07184	1.55882	0.0992366	3.12658	0.634409	0.87234	1.76433	0.548023	0.326184	0.413725	-0.102564	0.162708	1.76699	0.847176
771		0.531034	-0.0407125	0.741573	0.272354	0.140162	-0.0453258	0.326733	-0.115152	0.776173	0.129562	0.0846395	1.15033	-0.0657244	0.0408163	1.20485	0.075	0.432024	0.119048	1.01266	1.33613	0.519126	0.355932	0.298429	0.5427	0.789116	2.47636	0.856164	0.962963	0.630058	0.187723	0.0919325	0.941176	0.65977	3.02899	1.0677	1.20896	0.0872483	3.79012	0.132075	0.763293	1.69231	0.533156	0.152212	0.449851	0.221477	0.10362	1.5641	1.02807
772		0.648746	0.0117647	0.272727	0.428571	0.0522088	-0.0284858	0.44898	-0.00680272	0.574007	0.130515	0.138624	0.68915	0.0172911	0.22043	1.35659	0	0.569132	0.0643275	1.03974	1.18182	0.640074	0.46729	0.28866	0.427027	0.701389	2.26599	1.3169	1	0.974359	0.0917874	0.0326556	0.826087	0.631206	2.92079	0.878378	1.63333	-0.271523	2.56886	0.541667	0.733108	1.45	0.472222	0.216549	0.501044	0.156463	0.155573	1.56842	0.978571
773		0.605735	-0.118987	0.462687	0.282744	-0.0548862	-0.0424597	0.516484	-0.0512821	0.889706	0.095814	0.138746	0.898734	0.0667667	0.147368	1.21393	-0.0777339	0.621795	0.047619	0.753425	1.16393	0.480663	0.475983	0.226804	0.61658	0.381579	2.34982	1.29391	0.633028	0.964072	0.168091	0.00935745	0.438356	0.42446	3.48387	1.02717	0.96875	0	3.76821	0.420561	0.762887	1.62667	0.667622	0.288256	0.473469	0.125	0.12396	1.92737	1.01423
774		0.595745	-0.0571429	0.477387	0.432258	0.0441558	-0.00145138	1	0.107914	0.594595	0.0914179	0.039749	0.93038	0.0631424	0.201072	1.2058	-0.138255	0.705521	0.23839	0.75	0.920635	0.540797	0.423581	0.185185	0.724324	0.622517	2.19608	0.944828	0.607477	0.861862	0.195668	0.024924	0.622378	0.700246	3.33696	0.916779	1.3871	-0.176471	3.26744	0.446809	0.738095	1.55063	0.634349	0.275439	0.532598	0.218543	0.139964	1.67039	1.03413
775		0.764286	0.0154242	0.581152	0.361976	-0.0209699	-0.0377907	0.0769231	-0.216216	0.489655	0.183126	0.0918803	0.779874	0.0588235	0.134715	1.25967	0.0391892	0.635802	0.174312	0.935065	1.19835	0.357401	0.357143	-0.123153	0.639437	0.477124	2.40364	1.11111	0.636364	0.558209	0.136681	0.0821317	0.801418	0.708428	2.89268	1.09887	1.52308	-0.100671	2.26437	0.530612	0.602716	1.5	0.438202	0.189381	0.878481	0.313433	0.136471	1.32584	1.20968
776		0.408759	0.0143416	0.2	0.215292	0.0661157	0.00150376	0.244444	-0.225352	0.714286	0.0900819	0.136461	0.741379	0.0349442	0.183099	1.2521	0.0776567	0.625806	0.127726	1.02837	0.630252	0.512287	0.488152	0.233533	0.5	0.353135	2.40339	1.06429	0.54902	0.84326	0.183788	0.0285714	0.984615	0.653207	2.71282	1.11096	1.91667	0.106383	3.13333	0.258427	0.688042	1.40895	0.637931	0.295826	0.385982	0.150327	0.175079	1.50505	1.0692
777		0.59322	-0.0726817	0.275362	0.334719	0.0936228	-0.180233	0.571429	-0.0704225	0.494881	0.125237	0.175836	1.11842	0.108251	0.106494	0.888889	-0.027451	0.5625	0.0946746	0.707006	1.21705	0.542857	0.367089	0.21875	0.308311	0.730496	2.53237	1.01935	0.6	1.06116	0.203501	0.0407013	1	0.81407	3.42708	1.01936	1.64286	0.164179	3.10778	0.403846	0.822695	1.50993	0.547486	0.363552	0.905455	0.197183	0.162022	1.35676	1.13284
778		0.736264	-0.0756098	0.473684	0.221655	0.0246914	0.00593472	0.662651	-0.246753	0.661972	0.100833	0.0969116	1.14286	0.00804682	0.0572207	1.38482	-0.0320856	0.536508	0.0144928	0.660606	1.33898	0.329609	0.567797	0.0927835	0.447721	0.578231	2.80303	1.14935	0.333333	0.740741	0.132948	0.00868486	0.835821	0.615925	3.26943	1.17589	0.793103	0.157143	3.19753	0.393939	0.610738	1.55556	0.512748	0.271416	0.454191	0.0675676	0.258934	1.41146	0.879004
779		0.391892	0.0441558	0.172414	0.299896	0.119279	0.0990991	0.730337	-0.217949	0.934783	0.148218	0.0802139	1.10256	0.0831461	0.111111	1.56213	-0.0969456	0.430341	0.146497	1.18792	1.32432	0.416342	0.399177	0.224719	0.416268	0.798611	2.43609	0.913043	0.84	0.595092	0.159942	0.0888179	0.971014	0.742794	3.27861	1.03404	1.55556	-0.208333	3.27329	0.377778	0.714286	1.92459	0.548747	0.224709	0.521569	0.108108	0.192519	1.22727	1.02206
780		0.635688	0.112314	0.492063	0.321238	-0.00555556	0.0795107	0.0465116	-0.109589	0.738806	0.243602	0.165775	1.19231	-0.00742942	0.266667	1.27374	0.163014	0.665552	0.149351	1.04	1.54386	0.654224	0.576037	0.150538	0.44357	0.809859	2.13653	0.859649	1.24444	0.89881	0.180043	-0.0289944	0.818182	0.69697	3.19792	0.972527	1.88462	-0.0454545	2.75904	0.454545	0.817241	1.53289	0.61516	0.298893	0.893191	-0.0833333	0.123233	1.71186	1.00763
781		0.707143	-0.0104987	0.376238	0.251055	-0.0520548	0.0105581	0.0736842	-0.127517	0.658182	0.127918	0.0677966	0.785507	0.0453858	0.0320856	1.53801	0.00403769	0.516129	-0.0200573	0.975904	1.41538	0.456274	0.586498	0.376884	0.469072	0.480519	2.26165	1.30935	0.59633	0.95122	0.199426	0.0250153	0.815603	0.620609	3.98343	0.942611	2.2459	-0.138889	2.92265	-0.0598291	0.871199	3.40385	0.630682	0.250227	0.530526	0.0422535	0.110383	1.58101	0.895105
782		0.684211	0.0226131	0.34359	0.327749	0.0130246	0.0030581	0.465116	-0.468354	0.828571	0.184466	0.181525	0.785507	0.0712678	0.0844687	1.09901	-0.0299728	0.678233	0.141104	0.6625	1.09091	0.570312	0.653846	0.0315789	0.582011	0.666667	2.16955	0.992933	0.721739	0.598765	0.16737	0.0697085	0.642384	0.873171	3.80874	1.00858	1.87097	0.0676692	3	0.571429	0.780822	1.29814	0.459155	0.367065	0.541535	0.0921053	0.174675	1.61714	0.946128
783		0.726937	0.0600255	0.569892	0.20603	0.184524	-0.00734214	-0.588235	0.0945946	0.962963	0.10942	0.0839532	1.09241	0.0386905	0.0406504	1.14099	-0.130081	0.314815	0.0718563	0.779141	1.6789	0.496212	0.504274	0.0486486	0.543175	0.622378	2.71942	1.14652	0.669565	0.768997	0.179115	0.0628571	0.52	0.897959	2.69953	0.997122	1.19355	-0.117241	3.58667	0.270833	0.752613	2.58871	0.39011	0.318721	0.473684	0.230769	0.202234	1.77011	1.18182
784		0.660517	-0.0335917	0.486631	0.226277	0.149321	0.0545455	-0.292929	0.3125	0.813433	0.124632	0.102725	0.934641	0.0186706	0.104396	1.45104	-0.112903	0.671141	0.135802	0.701863	0.984127	0.492593	0.535714	-0.29902	0.637883	0.846743	2.20539	1.02899	0.966667	0.635258	0.204628	0.0519645	0.737226	0.813268	3.19251	1.0083	2.14286	0.033557	3.52903	0.3125	0.761733	1.59603	0.639535	0.295826	0.610936	0.294964	0.179903	2.22619	1.02941
785		0.728571	-0.0385604	0.534091	0.336887	0.00437956	-0.00745156	-0.0222222	0.025641	0.694545	0.0919431	0.00105374	1.06689	0.0305742	0.104396	1.36975	0.100141	0.639344	0.140244	1.03659	0.874016	0.513109	0.484444	0.284211	0.588076	0.587413	2.57353	1.05755	1.06186	0.37037	0.17147	0.10828	1.15625	0.792	2.43119	1.09231	0.515152	-0.202532	3.49007	0.663158	0.861947	1.377	0.314763	0.124561	0.619147	-0.0860927	0.161989	1.65868	0.99262
786		0.606299	0.069281	0.385366	0.355036	0.0832196	-0.0498534	-0.227273	-0.213793	0.790614	0.127962	0.0477178	1.13029	0.0532915	0.123596	1.27826	-0.0293296	0.75082	0.0625	0.794521	1.06504	0.500982	0.422018	0.417989	0.436842	1.09091	2.43682	1.37276	0.526316	0.707317	0.154179	0.0586782	0.802632	1.1123	3.13659	1.09283	1.30303	-0.14094	3.38462	0.705263	0.874552	1.71528	0.568047	0.232751	0.582809	0.0547945	0.218821	1.4881	0.760274
787		0.785978	-0.026178	0.23	0.37698	0.0354223	-0.00304878	0.103448	0.00719424	0.879699	0.170974	0.109925	0.777778	0.0161414	0.024	1.30508	0.190476	0.627329	0.196262	0.987342	1	0.432432	0.371179	0.405714	0.473684	0.710247	2.5	0.882759	1.01064	0.80531	0.185673	0.0753769	0.886525	1.1126	3.01042	1.10647	1.37931	-0.0571429	3.10976	0.927711	0.8	3.18692	0.87574	0.342723	0.607884	0.264706	0.204002	1.82803	0.930796
788		0.366548	-0.0759494	0.42	0.310995	0.0190896	-0.00920245	0.342105	-0.0656934	0.913043	0.206318	0.0404984	0.973333	-0.0682853	0.177778	1.21574	-0.200809	0.554098	0.304878	1.34839	1.26154	0.295203	0.675676	0.291667	0.494681	1.03226	2.53285	1.02778	0.483333	0.671827	0.178702	0.0316574	0.387755	0.920988	2.97872	1.1867	1.6	-0.38961	3.3354	0.520833	0.84456	1.54795	0.654545	0.0853549	0.576076	0.0789474	0.212312	1.6506	0.931973
789		0.834586	-0.0405063	0.24	0.376509	0.061693	-0.0352941	-0.154639	-0.428571	0.780919	0.161417	0.119914	1.10366	-0.00306748	0.146006	1.30239	-0.135061	0.786667	0.25641	1.1	1.54839	0.527132	0.650224	0.03	0.60218	0.533784	2.053	0.706485	0.980769	0.785276	0.203855	0.0227412	0.1625	0.95122	2.68868	1.14162	1.50847	0.0656934	2.65909	0.577982	0.920721	2.24348	0.359773	0.391791	0.536325	0.188811	0.218823	1.62703	1.1844
790		0.728938	0.00787402	0.258427	0.375	-0.0334262	0.0702028	0.116279	-0.0428571	0.671533	0.159248	0.16309	0.68997	0.00547303	0.0271739	1.18681	0.0252454	0.931034	0.00895522	1.04	1.46602	0.48785	0.621359	0.351955	0.539295	1	2.77692	1.16667	0.890909	0.598784	0.136465	0.051494	1.016	0.78	3.25414	1.04023	1.28125	-0.115942	3.5	0.744186	0.829181	1.26837	0.488372	0.223355	0.53001	0.35	0.192997	1.43956	1.09057
791		0.784615	-0.00389105	0.396825	0.408543	0.0304709	0.0418605	-0.292683	-0.00740741	0.70073	0.124756	0.133047	1.04516	0.0164965	0.0983607	1.5109	-0.00283286	0.611465	0.264151	1.11765	1.11024	0.455645	0.67619	0.294118	0.693642	0.547445	2.12857	1.00738	0.514563	0.865031	0.129496	0.0905563	0.540741	0.79397	3.48837	1.22812	2.375	0.255814	3.75714	0.736842	0.734043	1.59136	0.462857	0.285308	0.547248	-0.0191083	0.189963	1.46486	1.07407
792		0.571956	-0.0597205	0.380711	0.317443	-0.0810811	0.00606061	-0.133333	0.109489	0.840304	0.0881226	0.0472193	0.79085	0.0442338	0.173333	1.28814	0.0118577	0.469256	0.131833	1.09333	1.72072	0.469307	0.513274	-0.0108696	0.622535	1.1645	2.56078	1.16216	0.980198	0.512987	0.104106	0.0813215	0.687075	0.923858	3.36782	1.12538	2.22222	0	3.31579	0.348837	0.869191	1.48254	0.40884	0.240876	0.513347	0.177215	0.22616	2.00621	1.06383
793		0.524823	-0.029987	0.414894	0.242718	0.106569	-0.043609	0.180723	0.0547945	0.714286	0.212644	0.0269151	0.895062	-0.0584615	0.0846561	1.21829	0.0543933	0.691275	0.08125	0.389831	0.714286	0.439024	0.54067	0.333333	0.666667	0.646643	2.28625	1.29412	0.68	1.04473	0.255639	0.100522	1.04762	0.407895	3.79769	1.23739	2.01754	0.112676	3.41667	0.642857	1.02504	1.64286	0.508475	0.404926	1.02625	0.208333	0.233856	1.46561	0.978947
794		0.549407	0.0362416	0.435028	0.379235	-0.118741	0.114961	-0.172414	0.2	0.738462	0.151936	0.0844156	1.16382	-0.0768049	0.229885	1.19303	0.0317241	0.72	0.162242	0.993007	0.616	0.505112	0.59	0.532164	0.568627	1.10487	2.26882	1.32283	0.557692	0.457143	0.0203193	0.00889454	0.75	0.894737	2.52558	1.14577	1.35821	0.0555556	2.39326	0.450549	0.80446	3.03738	0.497207	0.221711	0.57384	0.271429	0.254959	1.27933	1.00755
795		0.757812	-0.105193	0.298969	0.312227	0.0876133	0.0953846	-0.333333	-0.0138889	0.598513	0.153242	0.0449679	0.947368	0.08603	0.117318	1.25946	0.00720461	0.576547	0.275	1.05161	1.28125	0.509728	0.256637	0.163043	0.350126	0.544828	2.12458	1.38686	0.583333	0.772455	0.104989	0.0948999	0.826772	0.938776	2.90323	1.12408	1.48387	0.0496454	3.76712	0.462366	0.820106	1.38188	0.597598	0.314618	1.02743	0.213793	0.155111	1.62428	1.3037
796		0.624549	0.0513834	0.634286	0.374732	0.00581395	0	0.011236	0.0657895	0.641026	0.158524	0.176863	1.03367	0.040613	0.171662	1.38095	-0.0419486	0.666667	-0.0559006	1.11268	1.24793	0.449799	0.722488	-0.0208333	0.608696	0.824176	2.66065	0.931034	0.792453	0.648094	0.0980966	0.0850785	0.561644	0.919799	2.92746	0.927114	2.14815	-0.0142857	3.60811	0.666667	0.96036	1.43854	0.616667	0.252109	0.578629	0.408451	0.247927	1.51744	0.756098
797		0.81203	-0.0222805	0.620112	0.32899	0.249231	0.0284858	0.402597	-0.153846	0.625	0.1801	0.0826271	0.84326	0.0269854	0.237288	1.14621	0.0962343	0.835616	0.154362	0.746835	1.41441	0.387524	0.671498	0.191011	0.573034	0.670251	2.32624	1.0824	0.695238	0.819315	0.158694	0.0784683	0.784173	1.05851	2.96907	0.911234	1.80645	0.084507	3.7619	0.705263	0.982332	1.3537	0.5	0.265455	0.468432	0.170068	0.27383	1.28283	1.23846
798		0.793103	0.0157068	0.676301	0.365427	-0.0920162	-0.0588235	0.162162	0.0933333	0.952191	0.151936	0.0105485	0.883077	-0.00771605	0.0837989	1.2093	0.00135318	0.649351	0.326667	0.829268	1.31579	0.42515	0.534884	0.202247	0.743169	0.711111	2.2892	1.09848	0.807018	0.832335	0.187359	0.0576052	0.602941	1.17526	2.6	1.13393	1.73333	-0.0273973	3.29299	0.854167	0.904594	1.75421	0.442254	0.322878	0.597031	-0.0138889	0.187853	1.36047	0.901754
799		1.064	-0.110266	0.384615	0.384447	-0.113573	0.0889236	0.04	0.08	0.67033	0.163636	0.143488	0.976119	-0.0151745	0.0291777	1.42643	0.118943	0.56051	0.149068	1.4026	0.748031	0.431535	0.522523	0.164835	0.545946	0.656357	2.42642	1.13669	0.389831	0.676012	0.135095	-0.0120635	0.5	0.810526	3.27957	0.919332	2.38776	0.0277778	2.94186	0.434343	0.681895	1.7331	0.238636	0.301471	0.615385	-0.044586	0.225793	1.56977	0.922261
800		0.836576	-0.0325945	0.529412	0.30582	0.224551	-0.0243902	0	-0.125926	0.660517	0.193613	0.0376749	1.06984	0.0376055	0.143662	1.32558	-0.0725462	0.795222	0.272131	1.34965	1.40708	0.433198	0.678049	0.352941	0.723343	0.228669	2.46565	1.0424	0.960784	0.689024	0.137905	0.0300704	0.553846	1.0686	2.78325	1.29563	1.77419	-0.109489	2.89412	0.727273	0.77193	1.60751	0.528736	0.308851	0.543501	-0.0709677	0.254561	1.68712	1.21561
801		0.783133	0.0738786	0.531646	0.33853	-0.0625889	-0.111801	0.282051	-0.102941	0.722846	0.250251	0.133038	0.847095	-0.0135028	0.0722222	1.35942	0.0143472	0.986207	0.12381	0.491124	1.41739	0.484	0.691542	-0.0574713	0.517442	0.619403	2.64567	1.1145	1.04124	0.628743	0.116844	-0.0412371	1.24138	0.857143	2.5082	1.05128	2.95652	-0.0229008	3.89394	0.101124	0.677758	1.72131	0.5	0.409836	0.516958	0.104895	0.198582	1.48837	0.884058
802		0.977444	0.0575636	0.407821	0.397778	0.122172	-0.0474684	0.2	-0.142857	1.04858	0.151163	0.149888	1.0493	0.000774593	0.0948509	1.19101	-0.114569	0.680272	0.113924	1.28986	1.2807	0.430353	0.50495	0.268571	0.577778	0.604317	2.53226	1.26122	1	0.473054	0.174144	0.0390117	1.09677	1.09068	1.97462	0.818991	1.17544	0.142857	3.30968	0.512195	0.812613	1.20755	0.658537	0.369811	0.569429	-0.186207	0.268586	1.68354	0.962406
803		0.445693	0.0571049	0.595506	0.366181	0.0308123	0	0.410256	-0.140845	0.768	0.117011	0.0702341	0.904762	0.0772947	0.127072	1.81905	0.0906475	1.15385	0.197492	1.09396	0.873874	0.532359	0.333333	0.252874	0.448087	0.877698	2.47636	1.21561	0.537037	0.775641	0.210811	0.015082	0.937984	0.715	3.30488	1.15797	2.5	-0.176471	3.32394	0.291667	0.897527	1.14035	0.569061	0.413231	0.501564	0.189542	0.254316	1.48555	0.85
804		0.861538	0.0226365	0.193548	0.344482	-0.0872576	0	-0.349398	-0.0746269	0.96	0.0987292	0.0815642	0.960526	0.0255591	0.211765	1.15106	-0.11955	0.871429	0.212698	0.937107	1.12632	0.241935	0.483871	0.229885	0.534328	0.574468	2.38577	0.955056	0.381818	0.705882	0.103817	0.0382166	0.666667	1.21762	2.93296	0.982379	1.33846	-0.0684932	3.37143	0.736264	0.923358	1.52667	0.308571	0.328972	0.726977	0.183673	0.245695	1.87425	0.962406
805		0.881423	0.0711409	0.695906	0.251656	0.121339	-0.190016	-0.139241	0.0503597	0.953488	0.141444	0.0451912	1.09655	0.0693687	0.183432	1.21493	0.266165	0.790541	0.192182	0.779141	1.41026	0.534021	0.444976	0.423313	0.668639	0.729927	2.64528	1.14672	0.979381	0.71519	0.189147	-0.0058102	0.716312	0.867647	3	1.04242	2.10204	0.102941	2.97315	0.402299	0.908088	1.29814	0.485876	0.282398	0.558912	-0.0552147	0.236242	1.28736	1.05882
806		0.92623	0.0313779	0.450292	0.397971	0.00276243	-0.031746	0.232877	0.219178	0.68	0.184524	0.118494	1.52434	0.0442203	-0.0108696	1.30211	0.0131004	0.862543	0.270968	1.48	1.57143	0.355509	0.591837	0.420765	0.640449	0.459854	3.048	1.38662	1.18519	0.465839	0.18997	0	0.758065	1.00522	2.61856	1.04651	1.66667	0.169231	3.38095	0.44898	0.899461	2.06716	0.468571	0.3358	0.569328	0.00699301	0.113878	1.31351	1.10196
807		0.661538	-0.0179806	0.604396	0.339891	-0.0989957	0.00651466	-0.0344828	-0.08	0.875486	0.154762	0.0384193	0.726984	0.0245059	0.11413	1.37037	-0.0139665	0.72028	0.0849673	1.12346	1.29825	0.385542	0.336449	0.411765	0.695775	0.713287	2.05495	1.19853	0.66	0.667674	0.158453	0.0228311	0.875	0.872679	3.28889	1.20031	1.27119	-0.161765	2.84337	0.638554	0.857651	1.36943	0.66242	0.275142	0.593785	0.04	0.189356	1.52571	0.921429
808		0.751938	0.00135318	0.775148	0.421053	0.0172911	-0.00628931	0.150685	-0.213793	1.05323	0.228891	0.0488889	0.894389	0.0362776	0.0777778	1.22222	0.174174	0.639344	0.0416667	1.38323	0.905512	0.363458	0.626794	0.281768	0.579832	0.66323	2.35	1.31008	0.719626	0.2	0.133333	0.070072	1.40336	0.756563	3.02312	1.19632	2.19298	0	3.2953	0.591837	1.05948	1.69965	0.556213	0.364683	0.670404	0.266667	0.228336	1.54749	0.760563
809		0.716475	-0.0530504	0.524324	0.435429	0.158385	-0.0580431	0.228571	-0.0140845	1.04016	0.0421156	0.075575	0.939189	0.056394	0.0662824	1.1686	0.0684524	0.731544	0.176101	1.09722	1.16667	0.389344	0.324324	0.289941	0.574468	0.459459	2.22581	1.3004	0.470588	0.224242	0.158378	0.0887574	0.611511	0.710784	3.1828	1.01441	0.777778	-0.0909091	4.01449	0.944444	0.849541	1.74098	0.519288	0.406829	0.589345	0.0253165	0.233263	1.34921	0.953488
810		0.768	0.0108992	0.238095	0.322905	0.111446	-0.0450161	-0.39759	0.0977444	0.766537	0.0403941	0.151111	0.749175	-0.0140625	0.127778	1.38554	-0.082153	0.735192	0.0788644	0.788079	0.560976	0.348089	0.563107	0.295918	0.439776	0.692308	2.48485	1.0963	0.877551	0.628205	0.138675	0.0510006	1.08065	0.873418	3.38788	0.947295	1.96296	-0.0294118	3.72857	0.347368	1.10964	1.31126	0.592705	0.294566	0.561905	0.279412	0.227033	1.48588	1.05948
811		0.503937	-0.0947931	0.382716	0.365798	0.165379	-0.0410509	-0.225806	-0.015625	0.793388	0.144299	0.116438	0.993103	-0.0164191	0.127168	1.39877	-0.0271041	0.638796	0.255172	1.44138	0.910714	0.374233	0.555556	0.313953	0.567073	1.04274	2.42972	1.38431	0.86	0.713376	0.171157	0.120261	1.01667	1.14754	2.5977	1.14439	1.70833	-0.0222222	3.70833	0.679012	0.655797	1.61029	0.569697	0.307042	0.548872	-0.0140845	0.199664	1.47059	0.889764
812		0.816	-0.0760719	0.686047	0.403756	-0.00413793	-0.0113821	-0.565217	-0.417266	0.734375	0.119675	0.104911	0.853821	-0.0715397	0.255014	1.21493	0.147541	0.948148	0.313131	1.03774	1.18487	0.305955	0.415094	0.162791	0.586402	1.07018	2.28148	1.13846	1.04396	0.451613	0.0648148	0.085342	0.725806	1.04178	3.89308	1.08036	1.66667	0.208955	3.8062	0.4	0.962121	1.52632	0.559524	0.391813	0.487537	0.0503597	0.191716	1.63905	1.01504
813		0.714286	-0.0286494	0.368984	0.369266	0.123028	-0.125201	-0.314286	-0.0952381	0.808765	0.209494	0.0738255	0.918089	-0.0533643	0.176812	1.38994	-0.0487445	0.866197	0.24359	1.26846	1	0.373253	0.507246	0.218935	0.623932	0.789855	2.664	1.53659	1.43182	0.830619	0.0873937	0.0686528	0.587302	1.10638	3.26415	1.13453	2.26531	-0.0510949	3.54054	0.481481	0.964029	1.71812	0.63354	0.368421	0.701528	-0.219178	0.203819	1.3432	1.06178
814		0.651515	-0.0507545	0.569767	0.4518	0.0895954	-0.117552	0.142857	-0.0461538	0.890196	0.15942	0.0520362	0.979798	0.00784929	0	1.31056	0.0412518	0.74216	0.318033	1.06494	1.2	0.36	0.38756	0.0526316	0.649123	0.91342	2.73913	1.08163	0.557522	0.744966	0.17096	0.0878553	0.96875	0.858639	2.85227	0.96291	0.820896	-0.0704225	3.0915	0.65	0.967093	1.51799	0.64497	0.33202	0.625	0.044586	0.184874	1.51534	0.841727
815		0.477273	-0.0684932	0.184783	0.415313	0.0539291	-0.00846024	0.21519	-0.333333	0.867188	0.151329	0.12212	1.28261	0.0562154	0.146814	1.26437	0.156773	0.575758	0.233333	1.53521	1.43396	0.416667	0.54902	0.0108696	0.517045	1.21519	2.1032	1.25483	0.469388	0.67619	0.126259	0.0383865	0.679389	0.895288	2.38922	1.28527	1.13559	-0.16129	3.18571	0.557895	0.83659	1.64539	0.306358	0.289421	0.538622	-0.219178	0.194055	1.44565	0.964158
816		0.534545	-0.0668486	0.434783	0.295964	0.0321637	-0.029316	0.153846	-0.115942	0.96139	0.10766	-0.0221987	0.885714	-0.0618637	0.301493	1.05217	-0.0961263	0.822064	0.165644	1.23602	0.894737	0.603412	0.701923	0.262032	0.684211	1.34599	2.31599	1.01476	0.809524	0.89697	0.0703593	0.0386379	0.537313	1.05222	3.03141	1.18759	2.25	-0.0206897	3.26761	0.52381	1.10923	1.43243	0.656051	0.243542	0.671053	-0.22973	0.188993	1.20652	1.09811
817		0.645283	0.0433604	0.688172	0.398104	0.146269	-0.026534	0.5625	0.119403	1.016	0.164271	0.0573678	1.12544	0.0196386	0.308357	1.68111	-0.0277372	0.814433	0.170886	1.09581	1.15789	0.465347	0.692308	0.462857	0.623188	1.38053	2.52416	1	1.2	0.934641	0.17321	0.0115533	0.71831	0.712159	2.97714	1.22047	1.03333	0.0364964	3.82707	0.333333	1.02963	1.52318	0.611285	0.374398	0.802817	-0.0428571	0.22304	1.54438	1.22222
818		0.433566	0.017931	0.710692	0.360544	0.0233196	0.0342466	0.0724638	-0.3	0.967871	0.130261	0.105323	1.21245	0.0475448	0.105413	1.31515	-0.00580552	0.683099	0.335593	1.25333	1.07843	0.44958	0.495146	0.421965	0.641026	1.12987	2.24031	1.02239	1.10204	0.493902	0.0838509	0.0279766	0.457143	1.04188	3.27711	1.1536	1.29167	0.313869	3.35461	0.182796	0.897623	1.768	0.467492	0.391045	0.547248	-0.056338	0.203001	1.38323	0.826415
819		0.868852	-0.108033	0.461078	0.335648	0.109034	0.015544	0.323077	-0.0441176	0.766537	0.143725	0.0774487	1.05281	0.060048	0.17847	1.2449	0.06875	0.79021	0.308219	1.31429	0.966942	0.404517	0.60199	0.284848	0.762319	1.16102	2.31765	1.38211	1.22917	0.539474	0.112952	0.046729	0.887097	0.906736	3.58824	1.14373	1.7037	-0.107692	3.74074	0.450549	0.798165	1.55396	0.42029	0.413255	0.566631	-0.191781	0.233443	1.33155	1.09057
820		0.588235	-0.00685871	0.389831	0.36056	-0.0421687	-0.0146819	0.060241	0.0298507	1	0.119342	0.117778	1.0068	-0.0119142	0.159763	1.35866	0.098966	0.468085	0.266667	1.16774	0.968	0.510373	0.406393	0.0769231	0.702128	1.09053	2.65992	1.30233	0.621053	0.578616	0.0955994	0.0230769	0.723077	1.09922	2.75532	1.1	1.40741	-0.0555556	3.45205	0.697674	0.981025	1.40404	0.534884	0.380309	0.732102	0.112676	0.139883	1.5283	0.913669
821		0.984127	-0.0288714	0.597561	0.275058	0.0832025	0.0673235	-0.0555556	-0.057971	1.02521	0.0920245	0.0952928	1.3295	0.0380952	0.133903	1.10494	-0.00610687	1.05224	0.179487	1.10256	1.17241	0.478632	0.708738	0.0514286	0.639053	0.970464	2.21583	1.15038	1.08081	0.178344	0.0742424	0.0566038	1.096	0.979487	2.51323	1.10526	1.7037	0.112903	3.32877	0.714286	1.07238	1.73529	0.855263	0.437624	0.566215	-0.253165	0.120653	1.24339	1.11628
822		0.40856	-0.13587	0.741176	0.235096	0.0637982	0.0616438	-0.181818	-0.125926	0.899614	0.174737	0.0753425	1.00683	-0.0177332	0.145299	1.28834	0.0335878	0.964539	0.340136	1.49333	1.34545	0.45898	0.753695	0.407407	0.700288	1.16364	2.54789	1.06275	1.15238	0.851613	0.178488	0.0931011	0.751938	0.930521	3.21118	1.15975	1.73077	0.277778	3.09032	0.227273	1.04642	1.83688	0.509202	0.358717	0.670455	0	0.124973	1.36782	1.04545
823		0.767442	-0.0889193	0.660606	0.37006	-0.0214724	-0.023569	-0.386667	-0.023622	0.876033	0.205977	0.0642616	0.971731	0.0446359	0.284024	1.27729	-0.00574713	0.877698	0.32872	1.55072	0.864407	0.387234	0.683168	-0.0833333	0.709302	0.869369	2.43511	1.44534	1.43956	0.272152	0.097318	0.0674603	0.676923	1.18428	2.92135	1.04856	1.86364	0.164179	3.27536	0.2	0.958879	1.35789	0.502959	0.321224	0.640177	0.0405405	0.169074	1.14508	0.659574
824		0.779468	-0.0564516	0.791411	0.457669	0.1518	0.0619765	0.0625	-0.0422535	0.885714	0.123028	0.0911136	0.920863	0.0096	0.206061	1.26625	0.262136	0.843003	0.256579	1.19231	1.07018	0.475	0.490196	0.134146	0.605797	1.28972	2.44853	1.21138	0.708333	0.631902	0.0833959	0.0664011	0.0428571	1.06897	2.9661	1.06567	0.692308	-0.0428571	3.13158	0.55814	0.919414	1.61961	0.71246	0.345813	0.61326	-0.0769231	0.194426	1.17614	1.07905
825		0.673469	-0.184885	0.438596	0.39759	0.0729483	0.0934744	0.0632911	-0.22963	0.843478	0.147752	0.0299667	1.20351	0.0232186	0.283133	1.56688	-0.103641	0.951049	0.28223	1.50323	1.05217	0.539785	0.502392	0.101796	0.661111	1.19298	2.19531	1.2249	0.76	0.504702	0.0735406	-0.0138067	0.969697	1.11917	3.06173	1.18692	1.6	0.238095	3.16667	0.288889	1.1336	1.50685	0.440476	0.357143	0.724218	-0.303797	0.191781	1.42458	0.915789
826		0.634981	-0.0942335	0.357576	0.385176	0.110632	0.0425894	-0.0285714	-0.288889	1.16194	0.0441932	0.087963	1.02606	0.0193349	0.192982	1.12828	0.14956	0.707483	0.268293	1.21519	1.4252	0.558442	0.735294	0.288889	0.611429	1.19912	2.33083	1.21862	0.62963	0.701863	0.0672646	0.0473062	0.573529	1.1589	3.05298	1.15509	2.10714	0.222222	3.74286	0.409091	0.973684	2.14062	0.442815	0.504683	0.696759	0.132867	0.139362	1.38824	1.09339
827		0.615094	-0.0406732	0.465909	0.24971	0.122417	-0.0305085	-0.481928	-0.0518519	1.048	0.0822785	0.13879	0.938356	0.0294352	0.182353	1.06042	-0.117994	0.785467	0.248322	1.27451	1.31683	0.502041	0.431579	0.459119	0.409639	1.12217	2.5678	1.08333	0.584906	0.233038	0.104906	0.00862641	1.11765	1.35694	3.04444	0.946108	2.33333	0.0153846	2.97143	0.27907	1.03143	1.7482	0.550152	0.207364	0.685969	-0.0746269	0.165689	1.16471	0.686131
828		0.72549	-0.0573427	0.511111	0.314702	0.0421217	0.0187394	-0.121212	0.0327869	0.637736	0.122732	0.229682	0.423197	-0.0747443	0.0118343	1.41751	-0.00453858	0.783784	0.145833	1.17722	1.01724	0.442266	0.636364	0.329114	0.579251	0.892857	2.52896	1.16393	0.942308	0.878205	0.0583832	0.0589831	0.734375	1.20163	2.84615	1.19718	1.16129	-0.475862	3.52555	0.5	0.962335	1.58865	0.590214	0.457732	0.625277	0.0694444	0.215398	1.18644	0.9
829		0.565574	-0.00425532	0.569767	0.447779	0.0334302	0.0542907	0.366667	-0.276596	0.97479	0.179039	0.161446	1.11348	0.0652699	0.327103	1.48562	0.0118694	0.544218	0.217391	1.66667	1.44231	0.325052	0.474227	0.0787879	0.847561	0.95279	2.70588	1.144	1.07767	0.4125	0.141066	0.0321285	0.808	1.19101	3.35802	1.20124	2	0.145299	3.49635	0.149425	1.11811	1.82869	0.597484	0.305584	0.784824	-0.104895	0.170807	1.19883	1.10317
830		0.669291	-0.00140647	0.843137	0.333333	0.0127119	0.037037	-0.047619	-0.035461	0.846743	0.0959184	0.101993	1.01325	0.00470219	0.247059	1.30861	-0.00291545	0.724638	0.166124	1.40268	1.05172	0.433962	0.636364	0.404762	0.846626	1.00926	2.52	1.63025	1.17391	0.258786	0.116314	0.0392027	1.22034	1.0813	3.37427	1.14029	1.16667	-0.0289855	3.48227	0.432099	0.90128	1.5434	0.573171	0.472367	0.604444	-0.0833333	0.141853	1.16575	0.857651
831		0.651452	-0.181572	0.649718	0.334101	0.0523169	0.00331126	0.396825	-0.0441176	0.846154	0.181719	0.0717593	1.15038	0.0610626	0.287834	1.13374	0.0142653	1.04511	0.240678	0.950617	1.28571	0.403888	0.543147	0.163636	0.821538	1.04717	2.15356	1.09848	0.408163	0.80339	0.140867	0.00723208	0.725191	1.1626	3.21118	1.25371	1.92308	0.0218978	3.68116	0.217391	1.15779	1.66415	0.492447	0.299401	0.696233	-0.0718954	0.11457	1.50323	0.714286
832		1.09917	-0.0879121	0.497006	0.447433	0.00578035	0.095986	0.15625	-0.19708	1.22034	0.0495258	0.0838117	0.851852	0.037037	0.2	1.30088	0.105882	0.869565	0.277193	1.06452	1.81553	0.490446	0.580952	0.234568	0.910256	1.33824	2.53226	0.922481	0.409524	0.979661	0.101002	0.0175676	0.530303	1.30252	2.85629	1.10345	1.13333	-0.255172	3.20979	0.714286	1.10305	1.40127	0.560117	0.394531	0.75	0.215385	0.25653	1.4386	1.02974
833		0.892562	-0.0259209	0.455621	0.387298	0.171779	0.00687285	-0.486486	0.0307692	0.967213	0.102747	0.0838117	0.736842	0.0338005	0.157576	1.07715	0.129129	0.954198	0.228669	1.29487	1.80392	0.361419	0.458128	0.0666667	0.651163	1.02542	2.30159	1.09877	0.576923	0.396104	0.17776	-0.0190664	0.52381	1.16959	3.44172	0.869048	2.28571	-0.0866142	3.68657	0.0617284	1.03422	1.55351	0.467085	0.324111	0.731818	0.102041	0.129216	1.35294	1.03676
834		0.70428	-0.0853147	0.694915	0.341404	0.0507042	0.0424448	-0.0379747	-0.140845	0.887097	0.0984127	0.0410959	1.0229	0.0224359	0.0628571	1.2521	-0.103641	0.868613	0.250936	1.14724	1.24299	0.399123	0.201754	0.232558	0.560241	1.18667	2.16031	0.828996	0.62963	0.687898	0.120811	0.0126414	0.984	1.1828	2.79141	0.938272	1.58621	-0.0551181	3.26316	0.356322	0.984526	1.55273	0.522659	0.439834	0.563991	0.366906	0.087013	1.21591	0.816092
835		0.806167	-0.117486	0.753086	0.306413	-0.0245399	0.00666667	-0.117647	-0.557143	1.1097	0.170418	0.119718	0.890034	0.0855746	0.190616	1.33766	0.109063	1.00719	0.131313	1.48052	1.19469	0.624434	0.43	0.402439	0.606838	1.23767	2.1711	1.45763	1.3913	0.691275	0.0688073	0.040264	0.826772	1.14857	3.1105	0.954819	2.04167	-0.0634921	3.72059	0.272727	1.00388	1.47273	0.274854	0.318091	0.720145	-0.109756	0.138859	1.05814	1.08955
836		0.792308	0.00987306	0.254237	0.475	-0.0162963	0.164336	0.625	0.265625	0.990991	0.223301	0.092182	0.941818	0.0141079	0.171598	1.53957	-0.026087	0.910112	0.147887	1.21935	1.23301	0.376299	0.69	0.00621118	0.738318	1.09442	2.24514	1.40816	0.75	0.881944	0.0568356	0.00995355	0.72093	0.939241	2.23316	1.09422	1.79245	0.138686	3.48819	0.463415	1.11111	1.84091	0.417417	0.249273	0.799043	-0.0512821	0.0938245	1.25434	0.772059
837		0.949367	-0.0124827	0.373494	0.384807	0.2	0.0118846	0.16129	-0.0338983	0.710638	0.1258	0.108669	0.573883	0.0235199	0	1.2236	-0.0988201	0.984615	0.188811	1.72109	1.38889	0.36	0.615385	0.286624	0.506098	0.814815	2.32794	0.959184	0.747573	0.758958	0.134661	-0.0228802	0.868852	1.18082	3.32222	1.01201	1.17021	0.109375	3.49624	0.333333	1.12205	1.75	0.611285	0.394366	0.738182	-0.152778	0.18632	1.15205	0.846743
838		0.725191	-0.0277778	0.656805	0.47184	0.0600924	0.0415225	0.25641	0.00729927	0.789916	0.157456	0.0186047	0.959044	0.0150435	0.368098	1.21865	0.115502	0.760797	0.3213	1.05063	1	0.542735	0.590476	0.506667	0.818182	1.08962	2.36626	1.23387	1	0.517241	0.144975	0.0353098	0.825397	1.06593	2.21387	0.880292	1.10909	0.269841	3.75188	0.368421	1.08925	1.43446	0.472141	0.400631	0.85122	-0.0629371	0.164094	1.17262	0.992126
839		0.784861	0.00141844	0.735849	0.531486	0.028065	-0.0740741	0.181818	0.193798	0.824701	0.14862	0.0813953	1.15556	-0.0120676	0.284024	1.14724	-0.0983847	0.735714	0.175627	1.4359	0.946429	0.331906	0.32093	0.251462	0.716814	1.23009	2.1635	1.08871	1.02299	0.672026	0.044358	0.0519126	0.80303	1.021	2.47977	0.785408	2.375	0.15625	3.36232	0.333333	0.897921	1.60584	0.498433	0.468487	0.726264	-0.0555556	0.189689	1.66667	1.14981
840		0.614458	-0.0893855	0.614035	0.462228	-0.0131387	0.0103806	-0.375	-0.0724638	1.01852	0.125	-0.00231214	1.05948	0.0144	0.375758	1.32323	0.107558	0.876812	0.289199	1.10738	1.22642	0.498911	0.458937	0.121387	0.747692	1.03571	2.29961	1.13992	0.654545	0.712418	0.119179	0.121482	0.511811	0.989717	2.56627	1.20593	1.47059	0.0571429	2.5817	0.409091	0.847358	1.68482	0.407625	0.5074	0.845054	-0.109489	0.217655	1.40244	0.931818
841		0.727273	0.00821918	0.649123	0.502525	0.189873	-0.0402802	0.180328	-0.234375	0.975104	0.216473	0.0567787	0.949458	0.0348653	0.19186	1.23301	0.0398773	0.885305	-0.0501672	1.32394	0.983051	0.395248	0.520833	0.290323	0.54717	0.604839	2.24427	1.33929	1	0.559871	0.0696203	0.0102389	0.646154	1.27666	2.72222	1.05178	1	-0.525926	3.2446	0.255814	0.968811	1.48689	0.507418	0.39916	0.681765	-0.102041	0.170764	1.04598	0.881919
842		0.77686	-0.0837989	0.588235	0.338012	-0.00626959	0.0338681	-0.292683	0.0676692	1.1875	0.0742358	0.147268	1.08271	0.0392799	0.290909	1.19417	0.00628931	0.832117	0.28169	0.78481	0.764706	0.45898	-0.163793	0.556962	0.85443	1	2.43775	1.208	0.84	0.414791	0.0734725	0.014966	0.577236	1.12958	2.33333	0.886131	2.09804	-0.161765	2.90278	0.181818	0.992248	1.60076	0.183183	0.366771	0.794152	0.0406504	0.24408	1.35802	1
843		0.950207	-0.0445682	0.660819	0.441176	0.018759	-0.00346021	-0.275	-0.111111	0.919028	0.126486	0.0981308	1.33858	0.0283401	0.27439	1.04106	-0.0400616	0.852941	0.273973	1.13423	0.572519	0.475054	0.46875	0.236842	0.635802	0.752988	2.62846	1.33051	0.836957	0.377778	0.11236	0.0013369	0.734375	1.18436	2.97531	1.04961	1.70588	0.147059	3.36641	0.477273	1.07364	1.62205	0.598706	0.411765	0.683849	-0.276316	0.142538	1.37805	0.901515
844		0.894273	-0.117241	0.764706	0.362745	0.0692308	0.062167	0.181818	-0.149606	0.982533	0.115589	0.0609896	1.16092	0.0500835	0.205882	1.21538	-0.139818	0.832727	0.293286	1.5493	0.946903	0.419643	0.0414747	0.0181818	0.647416	0.731225	2.34746	1.16736	1.46591	0.627907	0.114332	-0.0481431	0.935484	1.01067	2.98734	1.19714	1.30189	-0.030303	2.97059	0.47619	1.04762	1.5	0.398734	0.381703	0.679096	-0.0289855	0.098172	1.25904	0.779468
845		0.826446	0.0515759	0.816092	0.37923	0.0335366	0.0569395	0.317647	-0.0757576	1.06809	-0.039657	0.0756694	0.921708	0.0781759	0.139394	1.21498	0.254237	1	0.138047	0.875	0.391304	0.465517	0.649485	0.121019	0.5375	0.683794	2.09091	1.29075	0.462963	0.819876	0.0822581	0.0759919	0.698413	1.10638	2.81818	0.905512	2.19231	-0.028169	3.18045	0.340659	1.00413	1.73518	0.39759	0.478992	0.701357	0.0962963	0.16738	1.16484	0.677656
846		0.761317	0.0420168	0.883117	0.400731	-0.0326409	0.0921986	-0.259259	-0.015873	0.810345	0.121844	0.103286	1.03559	0.0941476	0.136778	1.42466	-0.110787	0.853659	0.244604	1.24	0.90566	0.387755	0.417582	0.00598802	0.753165	0.91453	2.39608	1.41441	0.829787	0.591195	0.109312	-0.0186593	0.569231	1.22652	2.66667	1.17974	2.17391	0.107692	3.74797	0.152174	1	1.79528	0.432927	0.408857	0.507795	-0.246154	0.143744	1.34118	0.92674
847		1	-0.0486787	0.729412	0.309609	0.115512	0.00692042	0.408451	-0.208054	0.910314	0.00858369	0.180952	0.881944	0.01473	0.249284	1.41916	-0.029052	0.55477	0.273973	1.56579	1.09375	0.205184	0.424658	0.4375	0.557423	0.706767	2.36471	1.15936	0.708333	0.317073	0.099026	-0.0215633	0.757576	1.27778	3.63291	1.09177	1.25	-0.117647	2.94558	-0.4	0.94186	1.4461	0.30625	0.402323	0.543478	0.0735294	0.202763	1.73077	0.946768
848		0.962963	-0.0226629	0.508772	0.513854	0.0118519	0.0805009	0.307692	-0.00775194	0.857741	0.0264317	0.148103	0.958333	0.0162338	0.287066	1.52805	0.113497	1	0.284211	1.65217	1.69811	0.288684	0.552083	0.0949721	0.751634	0.809917	2.38224	1.09091	1.16	0.594684	0.149877	-0.00266312	0.982759	1.11989	2.96226	1.14145	0.966102	0.0724638	3.26154	0.27907	1.09843	1.55686	0.605096	0.424599	0.603583	-0.186207	0.213734	1.27848	0.724138
849		0.877193	-0.0725462	0.8125	0.391304	0	0.00732601	0.285714	0.159664	1.10762	0.097589	0.183475	0.992453	-0.00244898	0.314985	1.45223	0.150242	0.984733	0.318841	0.972603	1.07273	0.6	0.176471	0.171053	0.613707	0.661017	2	1.31532	1.55172	0.331269	0.0409639	-0.0145128	0.252033	1.38235	3.08	1.22517	1.52174	-0.016129	3.80952	0.351351	0.762712	1.5814	0.290909	0.280248	0.7259	0.0434783	0.181077	1.10227	0.685714
850		0.764228	0.035868	0.795181	0.364648	0.0604651	0.00699301	0.470588	0	0.92437	0.135802	0.0848268	1.35019	0.0702614	0.214502	1.34839	0.0903704	0.952191	0.181818	0.679012	1.23529	0.470852	0.476923	0.230769	0.794872	0.611111	2.11698	1.10442	1.45238	0.452941	0.0939227	0.073624	0.646154	1.125	3.03822	0.987055	1.44	0.0496454	2.76552	0.195652	1.08925	1.37247	0.238636	0.340602	0.590466	0.227273	0.165183	1.5896	1.07287
851		0.714286	-0.0128023	0.502762	0.466667	0.107084	0.0210526	0.115385	0.165354	1.22707	0.0613563	-0.002331	1.05755	0.0412111	0.0830769	1.39103	0.251656	0.714286	0.241379	1.16883	1.25	0.340611	0.541667	0.190184	0.700599	0.714286	2.57143	1.00813	0.89899	0.505017	0.118531	0.0836213	0.612903	1.33048	3.62025	1.20805	0.766667	-0.0142857	3.28369	0.612903	0.995984	1.53125	0.386076	0.255341	0.741339	0.15942	0.124153	1.53012	1.00778
852		0.829787	-0.00842697	0.362637	0.469182	-0.075	-0.0107914	0.0632911	-0.461538	0.692913	0.0903084	0.189873	1.10728	0.0641447	0.231707	1.2517	0.111111	0.703971	0.105634	1.10738	1.18018	0.26477	0.31068	0.72973	0.634731	0.662745	2.35115	1.3691	0.918367	0.580328	0.0566968	0.0862664	0.751938	1.16066	3.16774	1.23232	1.39216	-0.165468	3.07407	0.5	0.995992	1.54902	0.406728	0.405291	0.684947	0.102362	0.106968	1.33121	0.901639
853		1.06114	-0.0998594	0.283784	0.464052	-0.0191693	0.101243	-0.142857	0.0218978	0.886463	0.13224	0.230189	0.730337	0.0614251	0.0703364	1.09967	0.00745156	1.016	0.398551	1.62595	1.03636	0.413093	0.402062	0.265823	0.981013	0.386973	2.67611	1.31356	1.02198	0.411043	0.0938776	0.0521262	0.216667	1.2521	3.05195	1.15705	2.41463	-0.169231	3.10448	0.108434	1.03502	1.66939	0.5	0.351522	0.728972	0.148649	0.168778	1.49351	0.916667
854		0.816594	-0.102384	0.490909	0.390089	0.126806	0.0865562	0.3	-0.106061	0.695652	0.162896	0.156055	1.00778	0.0590164	0.180124	1.2623	0.135566	0.791822	0.242647	1.01299	1.51429	0.387025	0.336493	0.470199	0.779817	0.701245	2.31148	1.57391	0.873684	0.570957	0.12562	-0.0159611	1.13559	1.11299	2.80892	1.28293	1.81818	-0.16129	3.08333	0.333333	0.872	1.18638	0.41433	0.535754	0.938619	0.23741	0.128788	1.08867	0.529412
855		1.02586	0.0238095	0.656805	0.536082	-0.0516717	0.00884956	0.611111	-0.465649	0.784232	0.114716	0.0761905	0.970149	0.042915	0.168254	1.08525	-0.0840841	0.945736	0.148936	1.5	0.898305	0.290749	0.59	-0.0641026	0.640118	0.873418	2.304	0.865546	1.17778	0.694805	0.127063	0.00683995	1.15385	1.03815	3.72848	1.06159	1.95833	-0.0962963	3.20588	0.425	0.868526	1.49811	0.407855	0.258696	0.747417	-0.0344828	0.180961	0.935484	0.648438
856		0.923077	0.0518519	0.717949	0.378947	-0.0993976	-0.0198915	-0.0117647	-0.277778	1.0166	0.135074	0.165432	1.05861	0.0326797	0.109195	1.12862	0.140065	0.960317	0.088968	1.33566	0.840708	0.382151	0.548387	0.417722	0.740413	0.722008	3.08295	1.27706	0.59596	0.410658	0.0451931	-0.0144132	0.653543	1.32676	3.40816	1.02875	2.47619	-0.117647	3.32168	0.580247	0.860279	1.5019	0.537975	0.444211	1.13333	-0.0496454	0.128885	1.06936	0.809524
857		1.17857	-0.0451977	0.493671	0.401307	0.0990415	0.00525394	0.0447761	-0.0578512	0.852174	0.0109409	0.19802	1.4	0.066343	0.0718563	0.975232	0.131886	0.688889	0.134948	0.896774	1.07273	0.418269	0.978261	0.296296	0.975976	1.0678	2.45528	1.32287	1.17582	0.807074	0.0941176	0.0179806	0.732283	1.24259	2.88312	1.1039	1.46154	-0.186992	2.93103	0.317073	0.94186	1.82591	0.597403	0.302326	0.70045	-0.183099	0.223448	1.20859	0.892308
858		0.708333	-0.017192	0.707317	0.252475	0.131195	-0.00722022	0.4	0.344828	0.799163	0.14094	0.0588235	0.93617	0.0658882	0.0470219	1.26578	0.0978261	0.772414	0.0872483	1.40845	0.830189	0.441242	0.378641	0.025641	0.803077	0.859903	2.65106	1.65455	0.873874	0.616099	0.177833	-0.00138504	0.709402	1.17877	2.96129	0.984051	1.875	0.149254	3.66165	0.753425	0.889571	1.91071	0.40694	0.364486	0.475027	-0.0454545	0.238227	1.34532	0.939655
859		0.697479	-0.0720222	0.440476	0.413572	-0.0267857	0.15508	0.235294	-0.4	1.00873	0.164786	0.0872162	0.955882	0.0243112	0.213115	1.06528	0.215889	0.657993	0.242647	0.602564	0.633333	0.501222	0.585492	0.175	0.505952	0.340996	2.3125	1.26778	0.959596	0.506579	0.0180624	-0.00134409	0.3125	1.21849	2.74118	0.92163	0.057971	-0.0307692	4.20354	0.384615	0.940828	1.33716	0.622754	0.341799	0.791563	-0.0638298	0.145042	1.34524	0.849206
860		0.938053	-0.0480226	0.75	0.383838	0.00787402	-0.084507	0.454545	-0.0909091	1.13699	0.101947	0.10107	1.10566	0.0690789	0.138365	1.06769	-0.0509259	0.774436	0.137931	1.08511	0.25	0.476852	0.84127	-0.211429	0.964072	0.460938	2.80672	1.1875	1.19565	0.434211	0.0865622	-0.0288124	0.6875	1.2117	2.42697	1.13355	1.03704	0.1875	3.30303	0.157895	1.20635	1.82353	0.375796	0.478903	0.687646	-0.450704	0.199817	1.85315	1.04149
861		0.972727	-0.0153846	0.490683	0.403101	-0.00451128	-0.0628366	-0.0625	-0.29771	0.839662	0.0690423	0.110571	1.08462	0.093572	0.175	1.03003	0.189542	0.961832	0.16263	1.13986	0.328	0.469194	0.42723	-0.127907	0.622093	0.553903	2.39316	1.30172	1.0396	0.367164	0.0348259	0.0504909	0.546875	1.42651	2.98788	1.09748	1.25532	-0.111111	3.4697	-0.0232558	0.984	1.87649	0.578947	0.41342	0.902133	-0.232877	0.183367	1.03681	1.11064
862		0.848101	-0.0569801	0.622642	0.39719	0.00768049	0.02693	0.242424	-0.220588	0.766667	0.213457	0.0752688	0.769231	0.0510708	0.204819	1.40714	0.207987	1	0.258182	1.28148	1.19802	0.450893	0.412371	0.174194	0.664706	1.01786	2.82222	1.66372	1.06383	0.677316	0.0630048	-0.00413793	0.622951	1.10929	3.0122	1.14	2.15556	0.0606061	3.15385	0.146341	1.03659	2.33645	0.389937	0.377416	0.518519	0.00729927	0.160152	1.50649	0.857708
863		0.914894	-0.00998573	0.664516	0.471053	-0.0216718	-0.0320285	0.6875	-0.0151515	0.744681	0.134259	-0.00856793	1	0.0230263	0.273885	1.35135	-0.075969	0.578182	0.190647	1.05369	0.947368	0.288288	0.589744	0.151899	0.678363	0.893443	2.17886	1.08197	1.08602	1.09459	0.0930041	0.0292479	0.507692	1.49547	2.83133	1.12238	1.44444	0.106061	3.17778	-0.340426	1.10127	1.59836	0.402985	0.401235	0.807169	0.106667	0.172901	1.27673	0.821012
864		0.898305	-0.0957746	0.654321	0.355007	-0.0490046	0.0499076	0.295775	-0.15	1.02703	0.142531	0.125457	1.18462	-0.00246914	0.2	1.30345	0.217247	1.04762	0.0533808	0.654321	0.960396	0.513889	0.353234	-0.2	0.867089	0.556452	2.42739	1.21834	0.641509	0.664516	0.126829	0.0042735	0.537313	1.25424	3.02581	1.17347	1.88889	-0.135593	2.73529	0.0526316	0.94332	1.67969	0.56875	0.375135	0.649203	-0.0757576	0.249207	1.55696	0.583942
865		0.966102	-0.0876672	0.552795	0.434109	0.0682196	0.0106762	-0.102564	-0.172932	1.05381	0.223776	0.0738423	1.42478	0.0490998	0.207547	1.24262	0.111987	0.975309	0.111888	1.4	0.584906	0.451923	0.336683	-0.0365854	0.740181	0.792531	2.44578	1.34783	0.0833333	0.665552	-0.0184443	-0.0164159	1.01613	1.31672	2.38554	0.837278	2.04348	-0.00813008	3.34711	0.728395	1.01205	1.56452	0.378462	0.404517	0.950262	0	0.184488	1.18857	0.813765
866		0.766393	-0.0961263	0.325153	0.315385	0.0272	0.0296296	0.037037	-0.030303	1.16981	0.0787037	0.0970874	1.15909	-0.00163666	0.111821	1.11847	0.194719	1.144	0.388679	1.42748	0.67619	0.268065	0.614583	-0.129412	0.795666	1.03941	2.05439	1.26244	1.45238	0.610561	0.111475	0.0389049	0.794872	1.29609	3.08108	1.11186	1.70588	0.107438	2.71233	0.942857	1.07243	1.53061	0.62987	0.408333	0.592342	-0.123288	0.227965	1.4	0.657795
867		0.894737	0.025788	0.753425	0.340967	0.0742496	-0.00952381	-0.391892	-0.149606	1.00893	0.153477	0.117207	0.785441	0.110177	0.103858	1.48611	0.192171	0.84556	0.360595	1.09023	0.960784	0.47343	0.22905	0.288591	0.795527	0.636364	2.26496	1.05263	1	0.541096	0.104377	-0.0124827	0.578947	1.22989	3.1375	1.20619	1.58333	0.220339	2.8156	0.561644	1.14969	1.639	0.533546	0.423286	0.680488	0.056338	0.237941	1.34177	1.01606
868		1.14592	0.0207101	0.693333	0.323077	0.0210016	0.0588235	-0.114754	-0.057971	0.911504	0.217287	0.0453461	1.29565	0.0599836	0.111782	1.27368	0.268631	0.92126	0.255319	1.20979	1.13208	0.368421	0.557895	0.159236	0.465875	0.756098	2.11111	1.18565	1.48889	0.808874	0.134255	0.000718907	0.924528	1.33708	2.5	1.03492	1.43137	-0.0294118	3.26772	0.156627	1.10505	1.528	0.593333	0.495039	0.535088	-0.342857	0.117356	1.35404	0.666667
869		1.18433	-0.0294118	0.869281	0.430429	-0.0171073	0.16129	-0.0322581	-0.0833333	1.06796	0.173333	0.202649	1.00806	0.0816667	0.21519	1.14013	0.0710572	0.818898	0.330882	1.53237	0.925926	0.399538	0.252427	0.246575	0.816393	0.757322	2.31984	0.983402	0.782609	0.862179	0.10795	0.0674157	0.7	1.42985	2.71831	1.00327	2.06122	-0.285714	3.28169	-0.025	1.30222	1.93043	0.387195	0.443067	0.85213	-0.320755	0.269313	1.02732	0.983471
870		0.876106	-0.0143678	0.813665	0.296061	-0.0923077	0.0671642	-0.166667	-0.0454545	1.03721	0.267373	0.120482	0.924242	-0.0451931	0.236842	1.21333	0.0267717	0.856061	0.290323	0.822785	1.28866	0.167816	0.540816	0.164557	0.587692	0.886256	2.36885	1.28571	1.2381	0.820189	-0.000804505	0.048218	0.512605	1.31642	2.80892	1.1642	0.924528	0.0814815	2.94558	0.247059	1.16985	2.11297	0.582781	0.477612	0.538636	-0.242424	0.246143	1.51701	1.06867
871		0.898148	-0.00148148	0.379747	0.445026	0.0553633	0.125954	-0.212121	-0.259259	0.803571	0.255814	0.120988	0.904412	0.0524506	0.285246	1.09859	-0.0139104	0.759398	0.459459	1.432	1.48193	0.380282	0.664671	0.32	0.986885	0.623932	2.51131	1.26923	1.15909	0.331148	0.0694215	0.026831	0.015625	1.11299	2.97386	1.14145	1.3913	0.0153846	3.77586	1.03279	1.13174	1.47347	0.345566	0.418103	1.27937	-0.114286	0.111008	1.33544	0.771654
872		0.973214	-0.0194903	0.856209	0.435762	0.021875	0.0369686	0.206349	-0.28	0.763636	0.220748	0.177914	1.2562	-0.00686106	0.255814	1.27922	0.00319489	0.676692	0.171429	1.15942	1.40909	0.495146	0.59116	0.236842	0.75625	0.811966	2.15058	1.3139	0.71134	0.496644	0.061157	0.0715328	0.709091	1.50909	3.14184	1.13953	2.08696	0.00787402	3.80645	0.25641	1.07143	1.62295	0.628378	0.450766	0.828571	-0.26087	0.128745	1.42857	0.610687
873		0.936937	-0.0259542	0.238095	0.508242	-0.00796178	0.19084	0.0526316	-0.0793651	0.963134	0.222089	0.0505549	0.742857	0.106272	0.324415	1.48327	0.128978	0.975709	0.311111	1.37879	1.50505	0.567568	0.38835	0.161765	0.756098	0.755656	2.55459	1.39819	1.19149	0.576923	0.0262046	0.0740474	0.54386	1.6055	3.01282	0.929374	1.90909	0	4.30508	0.485714	1.30675	1.52756	0.350482	0.427971	1.17311	-0.191781	0.145446	0.973684	0.966805
874		0.72973	-0.0334789	0.683544	0.417655	-0.0703364	0.032491	-0.194444	-0.312977	0.864865	0.259861	0.127086	1.22222	0.055794	0.118421	0.986301	0.109299	0.726562	0.306273	1.36232	0.965517	0.369928	0.397849	0.438356	0.785489	0.624521	2.3719	1.12069	1.21739	0.503226	0.0999188	0.0748003	0.428571	1.05571	2.36471	0.860979	2.01961	-0.0894309	3.73282	0.325	1.02459	1.46721	0.462295	0.394678	0.624257	0.020979	0.107699	1.17089	0.6139
875		0.905579	-0.144131	0.447853	0.481283	0.0403727	0.06	0.476923	0.0307692	0.779736	0.242131	0.0660025	0.895911	0.0434783	0.315789	1.22148	-0.181679	1.14575	0.160839	1.27338	1.20183	0.446602	0.602094	0.422819	1.03834	0.515625	2.68831	1.30973	1.24176	0.765101	-0.0304976	0.0369338	0.40678	1.28969	2.62791	0.897436	2.42857	-0.0364964	3.08633	0.506173	1.04073	1.75862	0.459119	0.414054	1.13353	-0.245033	0.0900118	1.35152	0.877551
876		1.04386	-0.0588235	0.688312	0.372185	-0.0421217	0.083004	0.290323	-0.149606	0.723849	0.230415	0.158291	1.04412	0.0592275	0.30033	1.12752	0.277978	1.09412	0.302158	1.11111	1.64583	0.567961	0.738636	0.506494	0.954984	0.728395	2.31405	1.13146	1.49412	0.448505	0.102007	0.0379928	-0.0075188	1.21111	2.89262	0.886364	1.5	0.155172	2.45455	0.0930233	1.12245	1.52846	0.590759	0.403315	0.677184	-0.255474	0.0565355	1.14451	0.816
[truncated: 25 more rows]
[truncated: 371 more columns]

## Sheet: Msn2 CaCl2
Nuclear localization trajectory
[truncated: 905 more rows]
[truncated: 658 more columns]

## Sheet: Msn4 CaCl2
Nuclear localization trajectory
[truncated: 905 more rows]
[truncated: 657 more columns]
